# Supplementary material for: Experimental evolution links post-transcriptional regulation to Leishmania fitness gain
Source: PLoS Pathog. 2022 Mar 16;18(3):e1010375. doi: 10.1371/journal.ppat.1010375 (PMC8959184; doi:10.1371/journal.ppat.1010375)
Supplement: S5 Table — Index. Detailed information on samples and analyses presented in the table. a Sheet in S5 Table. All RNAnorm LP ogvs EPlog. RNA normalized abundance determined for EP.1 and LP.1 log parasites for all genes. b Sheet in S5 Table. RNAsig_RNAnorm_LPlogvs EPlog. RNA normalized abundance determined for EP.1 and LP.1 log parasites for genes whose RNA read counts were associated with adj p-value < 0.01). c Sheet in S5 Table. All_RNA&DNA_LPstatvs EPstat. RNA normalized abundance determined for EP.1 and LP.1 stat parasites for all genes. d Sheet in S5 Table. Gene dosage dependent. List of genes for which the ratio of normalized RNA read counts / normalized DNA read counts # 1. e Sheet in S5 Table. Gene dosage independent. List of genes for which the ratio of normalized RNA read counts / normalized DNA read counts is <0.8 or >1.2. f Sheet in S5 Table. RNAnormCoverChr5_LPlog-EPlog. RNA normalized coverage determined between EP.1 log and LP.1 log for the chromosome 5. g Sheet in S5 Table. RNAnormCoverChr26_LPlog-EPlog. RNA normalized coverage determined between EP.1 log and LP.1 log for the chromosome 26. h Sheet in S5 Table. RNAnormCoverChr36_LPlog-EPlog. RNA normalized coverage determined between EP.1 log and LP.1 log for the chromosome 36. i Sheet in S5 Table. GO_RNA norm Abundance_BP. GO term enrichment analyses for the category biological process. j Sheet in S5 Table. Categories. List of gene dosage independent genes manually assigned to a category. (XLSX) [file ppat.1010375.s015.xlsx]

## Sheet: index
Analysis of gene copy number-independent changes in RNA abundance.
Samples
EP.1log = early passage promastigotes (<5) collected during exponential growth phase for RNA preparation; three independent preparations EP.1 log1, log2, log3.
EP.1stat = early passage promastigotes (<5) collected during stationary growth phase for RNA preparation; three independant preparations EP.1 stat1, stat2, stat3.
LP.1log = late passage promastigotes (>20) collected during exponential growth phase for RNA preparation; three independent preparations LP.1 log1, log2, log3.
LP.1stat = late passage promastigotes (>20) collected during stationary growth phase for RNA preparation; three independent preparations LP.1 stat1, stat2, stat3.
DNAxRNA seq data
a-All_RNAnormLPlogvsEPlog = RNA normalized abundance determined for EP.1 and LP.1 log parasites (normalized RNA read counts / normalized DNA read counts for each gene) for all genes
b-RNAsig_RNAnorm_LPlogvsEPlog = RNA normalized abundance determined for EP.1 and LP.1 log parasites (normalized RNA read counts / normalized DNA read counts for each gene) for genes whose RNA read counts were associated with adj p-value < 0.01
c-All_RNA&DNA_LPstatvsEPstat = RNA normalized abundance determined for EP.1 and LP.1 stat parasites (normalized RNA read counts / normalized DNA read counts for each gene) for all genes
d- gene dosage dependant = list of genes for which the ratio of normalized RNA read counts / normalized DNA read counts # 1
e- gene dosage independant = list of genes for which the ratio of normalized RNA read counts / normalized DNA read counts is <0.8 or >1.2
f-RNAnormCoverChr5_LPlog-EPlog = RNA normalized coverage determined between EP.1 log and LP.1 log for the chromosome 5
g-RNAnormCoverChr26_LPlog-EPlog = RNA normalized coverage determined between EP.1 log and LP.1 log for the chromosome 26
h-RNAnormCoverChr36_LPlog-EPlog = RNA normalized coverage determined between EP.1 log and LP.1 log for the chromosome 36
i-GO_RNAnormAbundance_BP = GO term enrichment analyses for the category biological process
j- Categories = list of gene dosage independent genes manually assigned to a category

## Sheet: a-All_RNAnormLPlogvsEPlog
Geneid	Product	Chr	norm_gDNA EP.1 log	norm_gDNA LP.1 log	norm_RNA LP.1 log	norm_RNA EP.1 log	EP_RNAnormAbundance	LP_RNAnormAbundance
LD11Cs1H1_c1	snoRNA	11	159.537	162.508	14	39	0.244457	0.0861497
LD11Cs2H1_c2	snoRNA	11	126.529	131.969	267	429	3.39052	2.0232
LD14Cs1C1_c6	snoRNA	14	98.1061	101.431	14	19	0.193668	0.138025
LD14Cs1C2_c7	snoRNA	14	173.29	164.689	46	81	0.467424	0.279314
LD14Cs1C3_c5	snoRNA	14	58.6803	74.1646	13	19	0.323789	0.175286
LD14Cs1H1_c4	snoRNA	14	179.708	158.145	28	59	0.32831	0.177053
LD14Cs1H2_c8	snoRNA	14	206.298	217.041	37	94	0.455652	0.170475
LD14Cs1H3_c3	snoRNA	14	302.57	280.299	90	126	0.416432	0.321086
LD15Cs1C1_c11	snoRNA	15	173.29	193.046	2	2	0.0115413	0.0103602
LD15Cs1C1_c22	snoRNA	15	127.446	136.332	1	2	0.0156929	0.00733503
LD15Cs1H1_c12	snoRNA	15	212.716	225.766	6	6	0.0282066	0.0265762
LD16Cs1H1_c23	snoRNA	16	162.288	187.593	3	3	0.0184857	0.0159921
LD16Cs2H1_c24	snoRNA	16	172.373	159.236	128	100	0.580136	0.803839
LD18Cs1C1_c25	snoRNA	18	203.547	175.596	7	9	0.0442158	0.0398643
LD18Cs1C1_c30	snoRNA	18	143.033	121.063	1	1	0.00699139	0.00826017
LD18Cs1C1_c61	snoRNA	18	137.532	127.607	6	7	0.0508973	0.0470195
LD18Cs1C2_c64	snoRNA	18	205.381	226.856	40	69	0.335961	0.176323
LD18Cs1C3_c31	snoRNA	18	150.368	154.873	2	4	0.0266014	0.0129138
LD19Cs1H1_c65	snoRNA	19	99.023	100.34	32	44	0.444341	0.318915
LD19Cs1H2_c66	snoRNA	19	133.864	122.153	22	24	0.179286	0.180101
LD19Cs2H1_c67	snoRNA	19	165.955	176.686	110	114	0.686933	0.622572
Ld1S_010005000	Protein of unknown function (DUF2946), putative	1	966.391	1428.76	983	971	1.00477	0.688009
Ld1S_010005100	Endonuclease/Exonuclease/phosphatase family, putative	1	1511.02	2320.92	782	529	0.350095	0.336936
Ld1S_010005200	Kinesin-13 1, putative	1	2013.47	2836.8	1392	969	0.481259	0.490694
Ld1S_010005300	hypothetical protein	1	621.644	825.627	597	598	0.961965	0.723087
Ld1S_010005400	carboxylase, putative	1	1842.01	2748.45	1134	1151	0.624861	0.412596
Ld1S_010005500	hypothetical protein	1	812.355	1156.1	854	665	0.818608	0.738693
Ld1S_010005600	BSD domain containing protein, putative	1	1688.89	2291.47	767	488	0.288947	0.33472
Ld1S_010005700	hypothetical protein	1	727.085	1061.21	500	352	0.484125	0.471161
Ld1S_010005800	UMP-CMP kinase, mitochondrial, putative	1	1021.4	1405.86	291	238	0.233013	0.206991
Ld1S_010005900	Glycosyl transferase family 11, putative	1	1014.07	1417.85	309	187	0.184406	0.217935
Ld1S_010006000	glutaredoxin-like protein	1	700.496	1037.21	621	513	0.732338	0.598719
Ld1S_010006100	hypothetical protein	1	1865.85	2837.89	1141	821	0.440014	0.40206
Ld1S_010006200	hypothetical protein	1	1147.93	1722.15	567	370	0.322318	0.32924
Ld1S_010006300	hypothetical protein	1	310.822	435.172	246	196	0.630586	0.565294
Ld1S_010006400	hypothetical protein	1	414.429	639.124	326	178	0.429506	0.510073
Ld1S_010006500	LSM domain containing protein, putative	1	310.822	447.169	290	195	0.627369	0.648524
Ld1S_010006600	hypothetical protein	1	1301.97	1862.84	1006	986	0.757315	0.540035
Ld1S_010006700	CLC-type chloride channel, putative	1	2228.93	3367.95	1913	1295	0.580995	0.568002
Ld1S_010006800	hypothetical protein	1	743.589	1003.4	526	336	0.451862	0.524216
Ld1S_010006900	Low molecular weight phosphotyrosine protein phosphatase, putative	1	1059	1390.59	722	621	0.586405	0.519205
Ld1S_010007000	CUE domain/Domain of unknown function (DUF1771)/Smr domain containing protein, putative	1	2412.31	3697.32	1463	957	0.396715	0.395692
Ld1S_010007100	cyclophilin type peptidyl-prolyl cis-trans isomerase, putative	1	993.897	1442.94	1241	1042	1.0484	0.860051
Ld1S_010007200	hypothetical protein	1	452.022	675.116	445	341	0.754389	0.659146
Ld1S_010007300	DNA excision/repair protein SNF2, putative	1	2845.08	3855.47	1445	978	0.343752	0.374792
Ld1S_010007400	Right handed beta helix region, putative	1	2355.46	3501.01	579	369	0.156657	0.165381
Ld1S_010007500	Calmodulin-binding, putative	1	911.378	1248.8	754	593	0.650663	0.603779
Ld1S_010007600	thioredoxin, putative	1	363.084	575.866	491	427	1.17604	0.852628
Ld1S_010007700	pseudouridylate synthase-like protein	1	1277.21	1826.85	1116	934	0.73128	0.610888
Ld1S_010007800	Cytochrome c oxidase biogenesis protein Cmc1 like, putative	1	598.722	809.267	1634	1464	2.44521	2.01911
Ld1S_010007900	4F5 protein family, putative	1	318.157	470.073	3770	3762	11.8243	8.02003
Ld1S_010008000	acidocalcisomal exopolyphosphatase, putative	1	1100.26	1586.9	2251	2350	2.13587	1.41848
Ld1S_010008100	hypothetical protein	1	530.873	727.468	423	483	0.909822	0.581469
Ld1S_010008200	poly(A) export protein, putative	1	905.877	1257.53	1217	1024	1.1304	0.967773
Ld1S_010008300	hypothetical protein	1	590.47	939.055	1397	1567	2.65382	1.48767
Ld1S_010008400	Mitochondrial pyruvate carrier 1	1	362.167	572.594	1281	1456	4.02024	2.23719
Ld1S_010008500	hypothetical protein	1	777.514	1081.93	695	528	0.679088	0.64237
Ld1S_010008600	hypothetical protein	1	2244.52	2952.41	1380	1021	0.454886	0.467415
Ld1S_010008700	hypothetical protein	1	610.642	961.959	522	415	0.679613	0.542643
Ld1S_010008800	Protein of unknown function (DUF788), putative	1	612.475	860.528	488	396	0.646557	0.567094
Ld1S_010008900	Dyggve-Melchior-Clausen syndrome protein, putative	1	2411.39	3489.01	1586	1060	0.43958	0.45457
Ld1S_010009000	hypothetical protein	1	2390.3	3483.56	1150	719	0.300799	0.330122
Ld1S_010009100	hypothetical protein	1	1583.45	2374.36	342	211	0.133253	0.144039
Ld1S_010009200	ribosomal protein S7, putative;ribosomal protein S7, putative (fragment)	1	695.911	937.964	3767	3267	4.69456	4.01614
Ld1S_010009300	ribosomal protein S7, putative;ribosomal protein S7, putative (fragment)	1	630.813	834.352	2872	2216	3.51293	3.44219
Ld1S_010009400	Ring finger domain/Zn-finger in ubiquitin-hydrolases and other protein, putative	1	2195.01	3170.54	863	428	0.194988	0.272194
Ld1S_010009500	Protein of unknown function (DUF791), putative	1	1810.84	2455.07	1390	907	0.500873	0.566176
Ld1S_010009600	alpha/beta-hydrolase-like protein	1	738.088	1101.56	1217	832	1.12724	1.10479
Ld1S_010009700	conserved protein	1	4222.23	5983.34	4174	2412	0.571262	0.697604
Ld1S_010009800	fatty acyl CoA synthetase 2, putative;long chain fatty acid CoA ligase, putative;fatty acyl CoA syntetase 1, putative;long chain fatty Acyl CoA synthetase, putative	1	2044.64	2862.97	2026	1424	0.696455	0.707656
Ld1S_010009900	beta eliminating lyase,putative	1	1007.65	1435.3	1393	804	0.797896	0.970527
Ld1S_010010000	fatty acyl CoA synthetase 2, putative;long chain fatty acid CoA ligase, putative;fatty acyl CoA syntetase 1, putative;long chain fatty Acyl CoA synthetase, putative	1	2095.07	2746.27	2199	1261	0.601889	0.800722
Ld1S_010010100	fatty acyl CoA synthetase 2, putative;long chain fatty acid CoA ligase, putative;fatty acyl CoA syntetase 1, putative;long chain fatty Acyl CoA synthetase, putative	1	1893.36	2834.62	1302	1680	0.887313	0.459322
Ld1S_010010200	fatty acyl CoA synthetase 2, putative	1	545.543	859.437	587	572	1.0485	0.683005
Ld1S_010010300	fatty acyl CoA synthetase 2, putative;long chain fatty acid CoA ligase, putative;fatty acyl CoA syntetase 1, putative;long chain fatty Acyl CoA synthetase, putative	1	2112.49	3023.3	3374	2518	1.19196	1.116
Ld1S_010010400	long chain fatty acid CoA ligase, putative	1	4710.93	6760.98	1219	640	0.135854	0.180299
Ld1S_010010500	RING. Posttranslational modification, protein turnover, chaperones	1	2052.89	2862.97	1671	992	0.483221	0.583659
Ld1S_010010600	hypothetical protein	1	1053.49	1553.09	872	468	0.444236	0.56146
Ld1S_010010700	pre-mRNA processing factor 3 (PRP3)/Protein of unknown function (DUF1115), putative	1	1886.02	2272.93	1296	788	0.417811	0.57019
Ld1S_010010800	tricarboxylate carrier, putative	1	925.131	1301.15	1359	1109	1.19875	1.04446
Ld1S_010010900	hypothetical protein	1	2877.17	4070.33	961	607	0.210971	0.236099
Ld1S_010011000	mitochondrial RNA editing ligase 1	1	1327.64	1919.55	1702	1407	1.05977	0.886664
Ld1S_010011100	Rab-GTPase-TBC domain containing protein, putative	1	5743.33	7667.31	1424	809	0.140859	0.185723
Ld1S_010011200	DNA-damage inducible protein DDI1-like protein	1	738.088	1027.4	615	456	0.617813	0.5986
Ld1S_010011300	hypothetical protein	1	1881.44	2601.21	2120	1497	0.795669	0.815004
Ld1S_010011400	hypothetical protein	1	2026.3	2882.6	1432	899	0.443665	0.496773
Ld1S_010011500	HSP70-like protein	1	3394.29	4606.93	2485	1581	0.465783	0.539405
Ld1S_010011600	mitochondrial-processing peptidase subunit beta, putative	1	1437.67	1973	2525	1792	1.24646	1.27978
Ld1S_010011700	hypothetical protein	1	4580.73	6241.82	1743	979	0.213721	0.279245
Ld1S_010011800	Poly(A)-binding protein. RNA processing and modification;Translation, ribosomal structure and biogenesis	1	892.124	1277.16	437	282	0.3161	0.342166
Ld1S_010011900	hypothetical protein	1	2468.24	3554.45	1017	666	0.269828	0.28612
Ld1S_010012000	PLAC8 family, putative	1	688.576	971.775	722	525	0.762443	0.742971
Ld1S_010012100	PLAC8 family, putative	1	1139.68	1538.92	419	387	0.339569	0.27227
Ld1S_010012200	ubiquitin activating enzyme, putative	1	1588.95	2219.49	1021	641	0.403411	0.460017
Ld1S_010012300	hypothetical protein	1	4891.55	6675.91	1434	628	0.128385	0.214802
Ld1S_010012400	Meckel syndrome type 6 protein, putative	1	6698.72	9443.99	2025	1264	0.188693	0.214422
Ld1S_010012500	hypothetical protein	1	2186.76	3124.73	991	575	0.262946	0.317147
Ld1S_010012600	protein kinase, putative	1	4287.33	5766.3	1345	817	0.190562	0.233252
Ld1S_010012700	hypothetical protein	1	1540.36	2082.06	1052	918	0.595966	0.505268
Ld1S_010012800	Eukaryotic initiation factor 4A-1	1	1092.92	1398.22	276	193	0.176591	0.197394
Ld1S_010012900	Eukaryotic initiation factor 4A-1	1	1112.17	1625.08	294	265	0.238272	0.180914
Ld1S_010013000	hypothetical protein	1	1508.27	2151.86	1177	887	0.588092	0.546968
Ld1S_010013100	C2H2-type domain-containing protein	1	1649.47	2106.06	815	501	0.303735	0.386979
Ld1S_010013200	calcium/potassium channel (CAKC), putative	1	2914.76	4031.06	1180	840	0.288188	0.292727
Ld1S_010013300	potassium channel subunit-like protein	1	3341.11	4782.53	1147	742	0.222082	0.239831
Ld1S_010013400	Peptidase family M3, putative	1	739.922	1031.76	112	151	0.204076	0.108552
Ld1S_010013500	Peptidase family M3, putative	1	288.817	416.631	31	44	0.152346	0.0744064
Ld1S_020182300	phosphoglycan beta 1,3 galactosyltransferase 4 (fragment)	2	2383.89	2559.77	21	20	0.00838966	0.00820386
Ld1S_020182400	histone H4	2	384.172	498.43	1087	1366	3.5557	2.18085
Ld1S_020182500	tagatose-6-phosphate kinase-like protein	2	911.378	924.876	10	10	0.0109724	0.0108123
Ld1S_020182600	Xaa-Pro aminopeptidase, putative (fragment)	2	1734.74	1929.37	502	523	0.301487	0.260188
Ld1S_020182700	cytochrome b-domain protein, putative	2	626.229	735.102	420	537	0.857514	0.571349
Ld1S_020182800	hypothetical protein	2	628.062	729.649	217	240	0.382128	0.297403
Ld1S_020182900	hypothetical protein	2	1120.43	1247.71	426	421	0.37575	0.341425
Ld1S_020183000	hypothetical protein	2	2807.48	3083.28	735	568	0.202316	0.238382
Ld1S_020183100	hypothetical protein	2	886.622	920.514	227	233	0.262795	0.246601
Ld1S_020183200	hypothetical protein	2	1009.48	1225.9	1010	1038	1.02825	0.823886
Ld1S_020183300	hypothetical protein	2	2700.21	2630.66	1199	1228	0.45478	0.455779
Ld1S_020183400	exportin-T, putative	2	3065.13	3268.7	691	656	0.21402	0.211399
Ld1S_020183500	phosphatidylinositol 3-kinase-like protein	2	13991.6	14631.2	1933	1909	0.136439	0.132115
Ld1S_020183600	Zinc-finger of C2H2 type, putative	2	730.753	727.468	767	974	1.33287	1.05434
Ld1S_020183700	Ankyrin repeats (3 copies)/Zinc finger, C3HC4 type (RING finger), putative	2	2357.3	2487.79	588	562	0.238409	0.236355
Ld1S_020183800	Vps51/Vps67, putative	2	5906.54	5872.09	1150	917	0.155252	0.195842
Ld1S_020183900	hypothetical protein	2	413.513	402.452	30	29	0.0701309	0.074543
Ld1S_020184000	phosphoglycan beta 1,3 galactosyltransferase, putative (fragment);phosphoglycan beta 1,3 galactosyltransferase	2	2130.83	2187.86	311	301	0.14126	0.142148
Ld1S_020184100	phosphoglycan beta 1,3 galactosyltransferase, putative (fragment);phosphoglycan beta 1,3 galactosyltransferase	2	2218.85	2159.5	209	223	0.100503	0.0967817
Ld1S_020184200	phosphoglycan beta 1,3 galactosyltransferase, putative (fragment);phosphoglycan beta 1,3 galactosyltransferase	2	1919.03	1967.54	54	82	0.04273	0.0274454
Ld1S_020184300	hypothetical protein	2	329.16	319.562	108	145	0.440516	0.337962
Ld1S_020184400	phosphoglycan beta 1,3 galactosyltransferase, putative (fragment);phosphoglycan beta 1,3 galactosyltransferase	2	2186.76	2121.33	441	628	0.287183	0.207889
Ld1S_020184500	phosphoglycan beta 1,3 galactosyltransferase, putative (fragment);phosphoglycan beta 1,3 galactosyltransferase	2	2582.85	2391.81	189	260	0.100664	0.0790197
Ld1S_020184600	phosphoglycan beta 1,2 arabinosyltransferase	2	2057.48	2060.25	770	376	0.182748	0.373741
Ld1S_020184700	phosphoglycan beta 1,3 galactosyltransferase	2	3198.08	3187.99	1162	1141	0.356777	0.364493
Ld1S_020184800	glycosyltransferase (GlcNAc), putative	2	2641.53	2655.75	791	731	0.276734	0.297845
Ld1S_020184900	hypothetical protein	2	3206.33	3054.93	1250	1212	0.378003	0.409175
Ld1S_020185000	small GTP binding protein rab6-like protein	2	893.957	867.072	514	377	0.42172	0.5928
Ld1S_020185100	hypothetical protein	2	291.568	299.93	482	637	2.18474	1.60704
Ld1S_020185200	hypothetical protein	2	600.556	590.045	332	368	0.612766	0.562669
Ld1S_020185300	Mitogen-activated kinase kinase kinase, putative	2	1533.94	1500.74	548	469	0.305749	0.365153
Ld1S_020185400	ATP-binding cassette protein subfamily A, member 9, putative;ATP-binding cassette protein subfamily A, member 6, putative;ATP-binding cassette protein subfamily A, member 3, putative (fragment);ATP-binding cassette protein subfamily A, member 7, putative;	2	7081.98	7108.9	1039	1609	0.227196	0.146155
Ld1S_020185500	Soluble NSF attachment protein, SNAP, putative	2	2007.05	2270.75	951	1432	0.713485	0.418805
Ld1S_020185600	ribosomal RNA processing protein 41B, putative	2	1038.82	1048.12	654	580	0.558324	0.623974
Ld1S_020185700	glycosyl transferase, putative	2	4320.34	4524.04	735	711	0.164571	0.162465
Ld1S_020185800	UAA transporter family, putative	2	2900.09	2814.98	650	539	0.185856	0.230907
Ld1S_020185900	hypothetical protein	2	3048.62	2973.13	870	924	0.303088	0.292621
Ld1S_020186000	casein kinase II, alpha chain, putative	2	1110.34	1015.4	906	1017	0.915935	0.892259
Ld1S_020186100	proteasome regulatory non-ATPase subunit 6, putative	2	1536.69	1446.21	1322	1454	0.94619	0.914113
Ld1S_020186200	FtsJ-like methyltransferase, putative	2	1447.75	1504.01	594	551	0.38059	0.394943
Ld1S_020186300	ubiquitin-conjugating enzyme E2, putative	2	583.135	559.507	234	230	0.39442	0.418226
Ld1S_020186400	hypothetical protein	2	253.976	255.214	38	35	0.137809	0.148895
Ld1S_020186500	Kinetoplastid RNA editing protein 1, putative (fragment)	2	2971.61	3037.48	763	505	0.169942	0.251195
Ld1S_020186600	hypothetical protein	2	2746.97	2707.01	946	920	0.334914	0.349463
Ld1S_020186700	rhomboid-like protein	2	1235.95	1277.16	323	358	0.289655	0.252905
Ld1S_020186800	Transmembrane amino acid transporter protein, putative	2	1154.35	1079.75	316	399	0.345649	0.29266
Ld1S_020186900	hypothetical protein	2	491.447	474.435	166	218	0.443588	0.34989
Ld1S_020187000	voltage-dependent anion-selective channel, putative	2	923.297	883.431	1732	2398	2.59721	1.96054
Ld1S_020187100	Mitochondrial outer membrane protein porin, putative	2	849.03	832.171	4053	4269	5.02809	4.8704
Ld1S_020187200	hypothetical protein	2	8563.65	8518.02	2063	2292	0.267643	0.242192
Ld1S_020187300	hypothetical protein	2	768.345	739.465	257	163	0.212144	0.347549
Ld1S_020187400	hypothetical protein	2	1877.77	2022.08	540	526	0.28012	0.267052
Ld1S_020187500	glycerate kinase, putative	2	2729.55	2650.29	596	584	0.213955	0.224881
Ld1S_020187600	hypothetical protein	2	512.536	515.88	112	114	0.222424	0.217105
Ld1S_020187700	hypothetical protein	2	5424.26	5331.13	1750	1880	0.346591	0.328261
Ld1S_020187900	hypothetical protein	2	2461.82	2325.28	984	1196	0.485819	0.423175
Ld1S_020188000	hypothetical protein	2	1015.9	1093.93	480	541	0.532532	0.438786
Ld1S_020188100	function. Function unknown	2	547.377	508.246	1552	3189	5.82597	3.05364
Ld1S_020188200	hypothetical protein	2	2347.21	2356.91	878	764	0.325493	0.372522
Ld1S_020188300	protein kinase, putative	2	3483.22	3687.51	605	638	0.183164	0.164067
Ld1S_020188400	hypothetical protein	2	9927.05	9677.39	1512	1679	0.169134	0.15624
Ld1S_020188500	TPR repeat/Tetratricopeptide repeat, putative	2	1391.82	1363.32	507	578	0.415283	0.371886
Ld1S_020188600	ARP2/3 complex subunit, putative	2	681.241	609.677	236	271	0.397803	0.38709
Ld1S_020188700	hypothetical protein	2	916.879	928.148	575	584	0.636943	0.619513
Ld1S_020188800	hypothetical protein	2	1838.34	1775.59	501	548	0.298095	0.28216
Ld1S_020188900	gamma-glutamyl phosphate reductase-like protein	2	1822.76	1820.3	274	357	0.195857	0.150524
Ld1S_020189000	Leucine-rich repeat protein. Function unknown	2	4115.87	3938.36	636	716	0.173961	0.161489
Ld1S_020189100	hypothetical protein	2	981.978	992.497	544	515	0.524452	0.548112
Ld1S_020189200	Nop14-like family, putative	2	2576.43	2758.27	555	400	0.155254	0.201213
Ld1S_020189300	mitochondrial carrier protein, putative	2	942.552	1032.85	1026	1159	1.22964	0.993367
Ld1S_020189400	hypothetical protein	2	1181.86	1149.55	314	355	0.300375	0.27315
Ld1S_020189500	hypothetical protein	2	1380.82	1351.32	1	4	0.00289683	0.000740016
Ld1S_020189600	Coiled-coil domain containing 147. Function unknown	2	2571.85	2626.3	7	8	0.00311061	0.00266535
Ld1S_020189700	ATP-dependent Clp protease subunit, heat shock protein 78 (HSP78), putative	2	2126.24	2306.74	7	6	0.00282188	0.00303459
Ld1S_030444900	Leucine rich repeat/Leucine Rich Repeat, putative	3	2595.69	2597.94	358	586	0.225759	0.137801
Ld1S_030445000	hypothetical protein	3	725.252	807.085	330	402	0.55429	0.408879
Ld1S_030445100	D-3-phosphoglycerate dehydrogenase-like protein	3	998.482	1042.67	1246	1297	1.29897	1.19501
Ld1S_030445200	2-aminoethylphosphonate:pyruvateaminotransferas e-like protein	3	1008.57	979.409	969	1159	1.14915	0.989372
Ld1S_030445300	Met-10+ like-protein, putative	3	1182.77	1143.01	557	523	0.442181	0.487311
Ld1S_030445400	hypothetical protein	3	1985.96	2089.7	631	564	0.283994	0.301958
Ld1S_030445500	glycerol-3-phosphate acyltransferase, putative	3	1566.03	1564	1467	1664	1.06256	0.937979
Ld1S_030445600	DNA primase large subunit, putative	3	1498.18	1488.75	878	891	0.594721	0.589758
Ld1S_030445700	cytochrome c oxidase assembly protein, putative	3	555.629	530.059	809	864	1.55499	1.52625
Ld1S_030445800	hypothetical protein	3	2457.24	2516.14	936	939	0.382137	0.371998
Ld1S_030445900	Leucine Rich Repeat, putative	3	2535.17	2523.78	1004	915	0.360922	0.397816
Ld1S_030446000	acetyltransferase, putative	3	552.878	627.127	656	693	1.25344	1.04604
Ld1S_030446100	hypothetical protein	3	494.198	508.246	324	421	0.851885	0.637487
Ld1S_030446200	hypothetical protein	3	813.272	833.261	1321	1854	2.27968	1.58534
Ld1S_030446300	ATP-binding cassette protein subfamily F, member 1, putative	3	1930.95	1884.65	1423	1283	0.664441	0.755046
Ld1S_030446400	hypothetical protein	3	610.642	574.776	543	559	0.915431	0.944716
Ld1S_030446500	zinc-finger of acetyl-transferase ESCO, putative	3	1915.36	1976.27	656	618	0.322655	0.331939
Ld1S_030446600	U2 splicing auxiliary factor, putative	3	650.984	549.691	866	1028	1.57915	1.57543
Ld1S_030446700	delta-1-pyrroline-5-carboxylate dehydrogenase, putative	3	1535.77	1584.72	7131	6606	4.30142	4.49984
Ld1S_030446800	protein kinase, putative	3	1032.41	1024.13	939	933	0.903714	0.916879
Ld1S_030446900	hypothetical protein	3	982.895	905.245	744	756	0.769157	0.821877
Ld1S_030447000	fatty acyl CoA synthetase 2, putative;long chain fatty acid CoA ligase, putative;fatty acyl CoA syntetase 1, putative;long chain fatty Acyl CoA synthetase, putative	3	1876.85	1834.48	3335	3693	1.96766	1.81795
Ld1S_030447100	hypothetical protein	3	466.692	502.792	469	563	1.20636	0.93279
Ld1S_030447200	ribosomal protein L38, putative	3	331.91	343.557	6344	7895	23.7865	18.4657
Ld1S_030447300	hypothetical protein	3	809.604	935.783	340	319	0.39402	0.363332
Ld1S_030447400	FYVE zinc finger/Apolipoprotein A1/A4/E domain containing protein, putative	3	6698.72	6538.48	866	1030	0.153761	0.132447
Ld1S_030447500	hypothetical protein	3	2856.08	2860.79	944	882	0.308815	0.329979
Ld1S_030447600	hypothetical protein	3	341.996	344.647	175	191	0.558486	0.507765
Ld1S_030447700	hypothetical protein	3	5613.14	5557.98	595	824	0.146799	0.107053
Ld1S_030447800	Coiled-coil domain containing 147. Function unknown	3	2964.27	2824.8	1268	1216	0.410219	0.448881
Ld1S_030447900	hypothetical protein	3	1700.81	1781.04	522	492	0.289274	0.293087
Ld1S_030448000	DDRGK domain containing protein, putative	3	918.713	868.162	389	307	0.334163	0.448073
Ld1S_030448100	protein kinase, putative	3	3938	3835.84	1052	809	0.205434	0.274256
Ld1S_030448200	ATP-dependent DEAD H RNA helicase. RNA processing and modification	3	4425.78	4365.9	897	965	0.218041	0.205456
Ld1S_030448300	GPR1/FUN34/yaaH family, putative	3	791.267	868.162	521	396	0.500463	0.600118
Ld1S_030448400	GPR1/FUN34/yaaH family, putative	3	1040.66	1000.13	344	303	0.291162	0.343955
Ld1S_030448500	GPR1/FUN34/yaaH family, putative	3	947.136	920.514	219	266	0.280847	0.237911
Ld1S_030448600	GPR1/FUN34/yaaH family, putative	3	821.524	840.896	508	780	0.949455	0.604118
Ld1S_030448700	MFS transporter, putative	3	1987.79	1909.74	1441	1333	0.670593	0.754553
Ld1S_030448800	PTP1-interacting protein, 39 kDa, putative	3	4566.06	4533.86	1270	1283	0.280986	0.280115
Ld1S_030448900	60S acidic ribosomal protein P2, putative	3	336.495	281.389	494	596	1.7712	1.75558
Ld1S_030449000	60S acidic ribosomal protein P2, putative	3	391.507	329.378	737	767	1.95909	2.23755
Ld1S_030449100	TLD domain protein, conserved	3	4720.09	4640.74	1176	865	0.183259	0.253408
Ld1S_030449200	hypothetical protein	3	2967.02	2876.06	401	402	0.135489	0.139427
Ld1S_030449300	hypothetical protein	3	345.664	385.002	156	149	0.431055	0.405193
Ld1S_030449400	hypothetical protein	3	2677.29	2792.08	841	851	0.317859	0.301209
Ld1S_030449500	Ankyrin repeats (3 copies)/DHHC palmitoyltransferase, putative	3	2792.81	2781.17	1014	1005	0.359852	0.364594
Ld1S_030449600	hypothetical protein	3	2731.38	2771.36	979	991	0.36282	0.353257
Ld1S_030449700	phosphate-Repressible Phosphate Permease-like protein;phosphate-repressible phosphate permease	3	1480.76	1524.74	465	596	0.402496	0.304971
Ld1S_030449800	hypothetical protein	3	6730.81	6679.18	1263	1122	0.166696	0.189095
Ld1S_030449900	RNA recognition motif. (a.k.a. RRM, RBD, or RNP domain), putative	3	2282.11	2325.28	1280	935	0.409708	0.550472
Ld1S_030450000	hypothetical protein	3	5796.51	5787.02	1752	1352	0.233244	0.302746
Ld1S_030450100	26S protease regulatory subunit, putative	3	1196.53	1195.36	1202	1545	1.29124	1.00556
Ld1S_030450200	hypothetical protein	3	3671.18	3678.78	1191	1153	0.314068	0.323748
Ld1S_030450300	exosome subunit rrp6p homologue. Translation, ribosomal structure and biogenesis	3	2053.81	1927.19	565	496	0.241502	0.293173
Ld1S_030450400	quinone oxidoreductase, putative	3	973.726	1017.58	542	552	0.566895	0.532635
Ld1S_030450500	hypothetical protein	3	566.631	579.138	799	764	1.34832	1.37964
Ld1S_030450600	DNA repair helicase, putative	3	3717.03	3531.54	1015	993	0.267149	0.28741
Ld1S_030450700	arginine N-methyltransferase, putative	3	1229.54	1205.17	947	800	0.650652	0.785778
Ld1S_030450800	kinase-like protein	3	1042.49	1036.12	899	1143	1.09641	0.867657
Ld1S_030450900	mitochondrial protein 99, putative	3	1886.02	1865.02	576	524	0.277834	0.308844
Ld1S_030451000	hypothetical protein	3	971.892	1036.12	685	733	0.754199	0.661118
Ld1S_030451100	hypothetical protein	3	1692.56	1657.8	902	920	0.543556	0.544095
Ld1S_030451200	hypothetical protein	3	2276.61	2517.23	992	921	0.404549	0.394083
Ld1S_030451300	hypothetical protein	3	2188.59	2126.78	1036	940	0.4295	0.487122
Ld1S_030451400	hypothetical protein	3	1621.04	1517.1	314	238	0.146819	0.206973
Ld1S_030451500	Uroporphyrinogen-III synthase HemD, putative	3	865.534	958.687	221	365	0.421705	0.230524
Ld1S_030451600	tRNA-Lys	3	141.199	159.236	1	1	0.00708218	0.00628
Ld1S_030451700	DEAD/DEAH box helicase, putative	3	5944.13	6060.78	5273	3963	0.666708	0.870021
Ld1S_030451800	hypothetical protein	3	8025.44	7645.5	1445	1142	0.142297	0.189
Ld1S_030451900	Aminoacyl-tRNA editing domain containing protein, putative	3	720.667	674.025	408	414	0.574468	0.605318
Ld1S_030452000	hypothetical protein	3	2747.89	2532.5	800	689	0.250738	0.315893
Ld1S_030452100	hypothetical protein	3	1304.72	1313.15	512	558	0.427678	0.389902
Ld1S_030452200	cytochrome c oxidase copper chaperone, putative	3	279.648	339.194	461	580	2.07403	1.3591
Ld1S_030452300	TatD related DNase, putative	3	2138.16	2003.54	942	767	0.358719	0.470169
Ld1S_030452400	hypothetical protein	3	919.63	934.692	294	232	0.252275	0.314542
Ld1S_030452500	Ubiquitin-like domain containing protein, putative	3	1542.19	1537.83	723	775	0.502532	0.470145
Ld1S_030452600	serine/threonine-protein kinase, putative	3	8517.81	8745.97	2708	2428	0.28505	0.309628
Ld1S_030452700	hypothetical protein	3	1419.33	1428.76	590	545	0.383984	0.412946
Ld1S_030452800	6-phosphofructo-2-kinase 1	3	6212.77	6295.27	1609	1446	0.232746	0.255589
Ld1S_030452900	hypothetical protein	3	2979.86	3030.93	742	654	0.219474	0.244809
Ld1S_030453000	hypothetical protein	3	7717.37	8005.42	1220	1137	0.14733	0.152397
Ld1S_030453100	choline/ethanolamine phosphotransferase, putative	3	1724.65	1675.25	494	506	0.293393	0.294882
Ld1S_030453200	hypothetical protein	3	1126.84	1132.1	196	170	0.150864	0.173129
Ld1S_030453300	hypothetical protein	3	2739.64	2797.53	542	263	0.0959982	0.193742
Ld1S_030453400	hypothetical protein	3	6322.8	6425.05	1721	1651	0.261119	0.267858
Ld1S_030453500	hypothetical protein	3	4109.45	3986.35	867	704	0.171312	0.217492
Ld1S_030453600	hypothetical protein	3	3682.19	3782.4	857	789	0.214275	0.226576
Ld1S_030453700	hypothetical protein	3	5657.15	5853.55	1272	928	0.16404	0.217304
Ld1S_030453800	NLI interacting factor-like phosphatase, putative	3	2021.72	2029.71	766	740	0.366025	0.377394
Ld1S_030453900	peter pan protein, putative	3	1072.75	1132.1	622	596	0.555582	0.549421
Ld1S_030454000	inorganic pyrophosphatase, putative	3	622.561	636.943	884	1361	2.18613	1.38788
Ld1S_030454100	Got1/Sft2-like family, putative	3	654.652	682.751	506	594	0.907353	0.74112
Ld1S_030454200	Amidohydrolase family, putative	3	1812.67	1923.92	832	840	0.463405	0.432451
Ld1S_030454300	hypothetical protein	3	888.456	877.978	489	601	0.676454	0.556961
Ld1S_030454400	multicopper oxidase, putative	3	1563.28	1656.71	1148	1057	0.676143	0.692941
Ld1S_030454500	hypothetical protein	3	398.843	437.353	3280	3573	8.95842	7.49966
Ld1S_030454600	MORN repeat, putative	3	993.897	992.497	1107	1504	1.51324	1.11537
Ld1S_030454700	eukaryotic translation initiation factor 2 subunit alpha	3	1177.27	1249.89	7418	7214	6.12772	5.93491
Ld1S_040797100	calcium-translocating P-type ATPase	4	2470.07	2777.9	3198	2778	1.12466	1.15123
Ld1S_040797200	pteridine transporter (truncated), putative	4	811.438	841.986	329	338	0.416544	0.390743
Ld1S_040797300	cAMP-specific phosphodiesterase, putative	4	1929.11	2076.61	1233	1369	0.709652	0.593756
Ld1S_040797400	hypothetical protein	4	283.316	291.205	452	480	1.69422	1.55217
Ld1S_040797500	hypothetical protein	4	1302.89	1292.43	864	521	0.399882	0.668509
Ld1S_040797600	hypothetical protein	4	546.46	558.416	431	450	0.823482	0.771826
Ld1S_040797700	hypothetical protein	4	1316.64	1554.18	1815	1972	1.49775	1.16781
Ld1S_040797800	DNA topoisomerase type IB small subunit	4	720.667	698.02	538	413	0.57308	0.770752
Ld1S_040797900	methyltransferase like 13. Amino acid transport and metabolism	4	655.569	741.646	677	650	0.991506	0.912834
Ld1S_040798000	hypothetical protein	4	447.437	436.262	534	602	1.34544	1.22403
Ld1S_040798100	hypothetical protein	4	4697.17	5154.44	2490	1962	0.417698	0.483079
Ld1S_040798200	hypothetical protein	4	1526.6	1693.79	871	684	0.448053	0.514232
Ld1S_040798300	hypothetical protein	4	932.466	1062.3	641	670	0.718525	0.603408
Ld1S_040798400	exosome complex exonuclease RRP40, putative	4	952.638	895.429	682	564	0.59204	0.761646
Ld1S_040798500	hypothetical protein	4	484.112	579.138	559	560	1.15676	0.965227
Ld1S_040798600	hypothetical protein	4	1140.6	1121.19	971	1065	0.933721	0.866041
Ld1S_040798700	hypothetical protein	4	1265.29	1424.4	27	55	0.0434682	0.0189554
Ld1S_040798800	hypothetical protein	4	1250.62	1428.76	24	42	0.0335833	0.0167978
Ld1S_040798900	surface antigen-like protein (fragment)	4	1355.15	1422.22	213	425	0.313619	0.149766
Ld1S_040799000	surface antigen-like protein (fragment)	4	1841.09	2031.89	385	825	0.448103	0.189479
Ld1S_040799100	surface antigen-like protein	4	497.865	599.861	827	982	1.97242	1.37865
Ld1S_040799200	surface antigen-like protein	4	783.932	861.618	268	535	0.682457	0.311043
Ld1S_040799300	hypothetical protein	4	960.89	1050.3	804	886	0.922062	0.765494
Ld1S_040799400	hypothetical protein	4	718.833	726.377	583	719	1.00023	0.802614
Ld1S_040799500	GRAM domain containing protein, putative	4	884.789	985.953	892	1269	1.43424	0.904708
Ld1S_040799600	RNA pseudouridylate synthase-like protein	4	3827.97	4100.87	888	638	0.166668	0.21654
Ld1S_040799700	Tetratricopeptide repeat, putative	4	781.181	808.176	588	567	0.725824	0.727564
Ld1S_040799800	Mitochondrial 39-S ribosomal protein L47 (MRP-L47), putative	4	1224.03	1385.13	1374	1289	1.05308	0.991962
Ld1S_040799900	AMP deaminase, putative;adenosine monophosphate deaminase, putative	4	5208.79	5360.57	1859	1571	0.301605	0.346791
Ld1S_040800000	Alcohol dehydrogenase GroES-like domain containing protein, putative	4	1200.2	1180.09	704	682	0.568241	0.596565
Ld1S_040800100	hypothetical protein	4	904.96	951.052	604	588	0.649753	0.635086
Ld1S_040800200	beta-fructofuranosidase-like protein;beta-fructofuranosidase, putative;beta-fructofuranosidase, putative (fragment)	4	1645.8	1662.16	1559	511	0.310488	0.937936
Ld1S_040800300	beta-fructofuranosidase, putative	4	941.635	995.769	31	34	0.0361074	0.0311317
Ld1S_040800400	mitochondrial exoribonuclease DSS-1, putative	4	2126.24	2319.83	1064	814	0.382835	0.458655
Ld1S_040800500	ADP-ribosylation factor, putative	4	487.78	538.784	726	884	1.81229	1.34748
Ld1S_040800600	hypothetical protein	4	5104.27	5623.42	2400	2504	0.49057	0.426786
Ld1S_040800700	hypothetical protein	4	592.304	605.314	407	297	0.501432	0.672378
Ld1S_040800800	phytanoyl-CoA dioxygenase (PhyH), putative	4	918.713	963.049	693	716	0.779351	0.719589
Ld1S_040800900	hypothetical protein	4	661.987	734.012	295	469	0.708473	0.401901
Ld1S_040801000	anaphase promoting complex, subunit 10-like protein	4	857.282	949.961	907	1090	1.27146	0.954776
Ld1S_040801100	hypothetical protein	4	2710.3	2766.99	1184	1145	0.422463	0.427901
Ld1S_040801200	Tetratricopeptide repeat, putative	4	1065.41	1161.55	1218	1230	1.15448	1.0486
Ld1S_040801300	C-type lectin domain-containing protein	4	10666.1	10981.8	4008	4118	0.386085	0.364967
Ld1S_040801400	serine/threonine protein kinase-like protein	4	3346.61	3554.45	809	920	0.274905	0.227602
Ld1S_040801500	calpain-like cysteine peptidase, putative	4	2357.3	2347.09	1352	1951	0.827643	0.576032
Ld1S_040801600	adenylosuccinate lyase, putative	4	1250.62	1318.6	1774	2107	1.68476	1.34536
Ld1S_040801700	60S ribosomal protein L11 (L5, L16)	4	529.956	599.861	4392	5592	10.5518	7.3217
Ld1S_040801800	ADP-ribosylation factor, putative	4	521.704	510.427	588	626	1.19991	1.15198
Ld1S_040801900	hypothetical protein	4	892.124	939.055	906	683	0.765589	0.9648
Ld1S_040802000	Nucleotidyltransferase domain containing protein, putative	4	7514.74	7889.81	2200	1609	0.214112	0.278841
Ld1S_040802100	hypothetical protein	4	3871.98	4016.89	1912	1511	0.390239	0.475991
Ld1S_040802200	huntingtin interacting protein (HIP), putative	4	2642.45	2822.62	1643	1506	0.569926	0.582084
Ld1S_040802300	hypothetical protein	4	1221.28	1314.24	463	485	0.397123	0.352295
Ld1S_040802400	Zinc finger, C3HC4 type (RING finger), putative	4	1562.36	1416.76	505	462	0.295706	0.356447
Ld1S_040802500	TPR repeat/Tetratricopeptide repeat, putative	4	3933.41	3952.54	1004	965	0.245334	0.254014
Ld1S_040802600	tyrosine phosphatase, putative	4	759.176	815.811	599	521	0.68627	0.734239
Ld1S_040802700	DENN (AEX-3) domain containing protein, putative	4	3670.27	3756.22	1298	1034	0.281723	0.34556
Ld1S_040802800	spermidine synthase, putative	4	832.526	892.157	1452	1241	1.49064	1.62752
Ld1S_040802900	Topoisomerase-related function protein-like protein. Replication, recombination and repair	4	748.174	700.201	529	498	0.665621	0.755497
Ld1S_040803000	Ankyrin repeat, putative	4	7849.4	8114.48	1445	1753	0.223329	0.178077
Ld1S_040803100	hypothetical protein	4	535.458	582.41	239	191	0.356704	0.410364
Ld1S_040803200	hypothetical protein	4	3100.89	3335.23	1057	915	0.295077	0.31692
Ld1S_040803300	hypothetical protein	4	448.354	436.262	549	510	1.13749	1.25842
Ld1S_040803400	hypothetical protein	4	904.96	952.143	1806	1983	2.19126	1.89677
Ld1S_040803500	hypothetical protein	4	579.468	624.946	5123	6159	10.6287	8.19751
Ld1S_040803600	Zinc finger, C3HC4 type (RING finger), putative	4	922.381	828.899	401	447	0.484616	0.483774
Ld1S_040803700	serine-threonine protein kinase-like protein	4	2968.86	3090.92	1039	930	0.313252	0.336146
Ld1S_040803800	hypothetical protein	4	431.85	429.718	122	147	0.340396	0.283907
Ld1S_040803900	hypothetical protein	4	460.273	450.441	1000	558	1.21232	2.22005
Ld1S_040804000	ubiquitin-conjugating enzyme E2, putative	4	403.427	456.985	1103	1180	2.92494	2.41365
Ld1S_040804100	axonemal dynein light chain, putative	4	1818.17	1892.29	1252	937	0.515353	0.661633
Ld1S_040804200	hypothetical protein	4	2714.88	2973.13	378	303	0.111607	0.127139
Ld1S_040804300	Tir chaperone protein (CesT) family/PDZ domain containing protein, putative	4	2046.47	1986.08	739	623	0.304426	0.372089
Ld1S_040804400	hypothetical protein	4	1778.75	1966.45	247	320	0.179902	0.125607
Ld1S_040804500	Protein of unknown function (DUF974), putative	4	1800.75	1962.09	681	572	0.317645	0.347079
Ld1S_040804600	hypothetical protein	4	2131.74	2145.32	657	578	0.271139	0.306248
Ld1S_040804700	60S ribosomal protein L10, putative	4	678.491	660.938	3085	3318	4.89027	4.66761
Ld1S_040804800	nascent polypeptide associated complex subunit- like protein, copy 1	4	508.868	608.586	1555	1299	2.55272	2.5551
Ld1S_040804900	nascent polypeptide associated complex subunit- like protein, copy 1	4	504.284	600.951	910	670	1.32862	1.51427
Ld1S_040805000	heat shock protein, putative	4	1378.07	1498.56	961	804	0.583425	0.641282
Ld1S_040805100	hypothetical protein	4	2957.85	2920.78	1066	964	0.325912	0.364971
Ld1S_040805200	hypothetical protein	4	1062.66	1086.29	857	693	0.652135	0.788921
Ld1S_040805300	Pescadillo N-terminus/BRCA1 C Terminus (BRCT) domain containing protein, putative	4	1674.22	1686.15	1750	1346	0.803956	1.03786
Ld1S_040805400	Peptide deformylase 2, putative	4	1117.68	1197.54	594	499	0.446462	0.496017
Ld1S_040805500	hypothetical protein	4	3504.31	3495.55	1198	974	0.277943	0.342721
Ld1S_040805600	tyrosine phospatase-like protein	4	2348.13	2353.64	1199	869	0.370082	0.509425
Ld1S_040805700	rhomboid-like protein	4	1011.32	994.678	1486	1014	1.00265	1.49395
Ld1S_040805800	hypothetical protein	4	1037.91	1032.85	755	738	0.711046	0.730986
Ld1S_040805900	hypothetical protein	4	2877.17	2977.49	807	668	0.232173	0.271034
Ld1S_040806000	hypothetical protein	4	576.717	585.682	560	541	0.938068	0.95615
Ld1S_040806100	hypothetical protein	4	3032.12	3351.59	1872	1855	0.611783	0.558542
Ld1S_040806200	hypothetical protein	4	4655.91	4862.14	1321	1455	0.312506	0.271691
Ld1S_040806300	F-box and WD repeat domain containing 11. Function unknown	4	645.483	718.742	380	314	0.486457	0.528701
Ld1S_040806400	hypothetical protein	4	1560.53	1577.09	762	548	0.351163	0.483169
Ld1S_040806500	Cytochrome c oxidase biogenesis protein Cmc1 like, putative	4	491.447	567.141	829	841	1.71127	1.46172
Ld1S_040806600	chaperone protein DnaJ, putative	4	1345.98	1273.89	1002	593	0.440572	0.786569
Ld1S_040806700	60S ribosomal protein L10, putative	4	631.73	630.399	1910	1851	2.93005	3.02983
Ld1S_040806800	adenylate kinase, putative	4	615.226	652.212	1522	1663	2.70307	2.3336
Ld1S_040806900	hypothetical protein	4	1227.7	1305.52	709	634	0.516412	0.543081
Ld1S_040807000	hypothetical protein	4	1251.54	1250.98	530	516	0.412292	0.423667
Ld1S_040807100	hypothetical protein	4	3098.14	3138.91	845	683	0.220455	0.269202
Ld1S_040807200	hypothetical protein	4	1052.58	1054.66	2131	2239	2.12716	2.02055
Ld1S_040807300	chloride channel protein, putative	4	3220.08	3147.63	1130	1051	0.326389	0.359
Ld1S_040807400	Domain of unknown function (DUF947), putative	4	598.722	647.85	685	589	0.983762	1.05734
Ld1S_040807500	hypothetical protein	4	547.377	614.039	1855	1661	3.03447	3.02098
Ld1S_040807600	COPI associated protein, putative	4	537.291	575.866	2730	2507	4.666	4.74068
Ld1S_040807700	acyltransferase-like protein, copy 1	4	1087.42	1138.64	968	1111	1.02169	0.850133
Ld1S_040807800	acyltransferase-like protein, copy 2	4	768.345	993.588	1194	1225	1.59434	1.20171
Ld1S_040807900	hypothetical protein	4	1259.79	1280.43	596	455	0.361171	0.465469
Ld1S_040808000	hypothetical protein	4	488.697	450.441	471	547	1.1193	1.04564
Ld1S_040808100	Transcriptional repressor TCF25, putative	4	2257.36	2437.62	1328	959	0.424833	0.544795
Ld1S_040808200	hypothetical protein	4	3394.29	3298.14	1532	1200	0.353535	0.464504
Ld1S_040808300	hypothetical protein	4	638.148	695.839	579	725	1.1361	0.83209
Ld1S_040808400	proton motive ATPase, putative	4	2224.35	2414.71	1311	1386	0.623104	0.542922
Ld1S_040808500	hypothetical protein	4	1717.31	1809.4	1370	1246	0.725551	0.757158
Ld1S_040808600	cytochrome c oxidase assembly factor, putative	4	786.682	809.267	713	570	0.724562	0.881044
Ld1S_040808700	zinc carboxypeptidase. Amino acid transport and metabolism	4	831.61	900.882	420	298	0.358341	0.46621
Ld1S_040808800	hypothetical protein	4	451.105	488.614	504	563	1.24805	1.03149
Ld1S_040808900	fructose-1,6-bisphosphatase, cytosolic, putative	4	970.975	945.599	1471	1382	1.42331	1.55563
Ld1S_040809000	hypothetical protein	4	674.823	653.303	603	446	0.660914	0.923002
Ld1S_040809100	Double RNA binding domain protein 3	4	798.602	740.555	872	1045	1.30854	1.17749
Ld1S_040809200	hypothetical protein	4	5713.08	6289.81	1822	1756	0.307365	0.289675
Ld1S_040809300	tRNA nucleotidyltransferase, putative	4	1266.21	1331.69	1297	1076	0.84978	0.97395
Ld1S_040809400	Leucine Rich repeat, putative	4	483.195	431.9	447	332	0.687093	1.03496
Ld1S_040809500	casein kinase I, putative	4	766.511	786.363	593	911	1.1885	0.754105
Ld1S_040809600	S-phase cyclin A-associated protein in the ER. Function unknown	4	2273.86	2460.52	1660	1278	0.56204	0.674654
Ld1S_040809700	actin	4	991.147	996.86	7916	7398	7.46408	7.94094
Ld1S_050809800	hypothetical protein	5	2507.66	3691.87	1717	1647	0.656786	0.465076
Ld1S_050809900	hypothetical protein	5	540.959	725.286	765	682	1.26072	1.05476
Ld1S_050810000	ras-like small GTPases, putative	5	652.818	871.434	3530	3823	5.85615	4.05079
Ld1S_050810100	paraflagellar rod component par4, putative	5	1807.17	2520.51	3531	3863	2.1376	1.40091
Ld1S_050810200	Receptor-type adenylate cyclase. Signal transduction mechanisms	5	2631.44	3334.14	2398	1808	0.687075	0.719227
Ld1S_050810300	major vault protein, putative	5	2391.22	3264.33	3035	3027	1.26588	0.929746
Ld1S_050810400	dynein light chain, putative	5	449.271	523.515	922	1018	2.26589	1.76117
Ld1S_050810500	Rrp15p, putative	5	683.075	1041.58	806	653	0.955971	0.773827
Ld1S_050810600	Nudix hydrolase 2, putative	5	590.47	764.55	576	472	0.799363	0.753384
Ld1S_050810700	phosphoprotein phosphatase, putative	5	2028.14	2756.09	2660	2228	1.09855	0.965136
Ld1S_050810800	hypothetical protein	5	540.042	670.753	620	510	0.944371	0.924334
Ld1S_050810900	hypothetical protein	5	1171.77	1535.64	903	641	0.547035	0.588027
Ld1S_050811000	protein kinase, putative	5	1536.69	2064.61	912	619	0.402814	0.441729
Ld1S_050811100	nucleolar RNA helicase II, putative	5	2272.94	2732.09	973	477	0.20986	0.356137
Ld1S_050811200	Leucine Rich repeat/Leucine rich repeat/Leucine Rich Repeat, putative	5	1525.69	1923.92	1325	1175	0.770145	0.688699
Ld1S_050811300	Kinesin family member. Cytoskeleton	5	1781.5	2401.62	771	583	0.327253	0.321033
Ld1S_050811400	basal body component, putative	5	2656.2	3389.76	1127	714	0.268805	0.332472
Ld1S_050811500	dihydrolipoamide branched chain transacylase, putative	5	1620.13	2114.78	1153	664	0.409845	0.54521
Ld1S_050811600	Fip1 motif/Zinc finger C-x8-C-x5-C-x3-H type (and similar), putative	5	1378.99	1758.14	1231	802	0.581587	0.700173
Ld1S_050811700	50S ribosome-binding GTPase, putative	5	2652.53	3435.57	1635	835	0.314794	0.475904
Ld1S_050811800	hypothetical protein	5	4779.69	6182.93	1615	913	0.191016	0.261203
Ld1S_050811900	dual specificity phosphatase-like protein	5	2142.75	2897.87	1093	826	0.385486	0.377173
Ld1S_050812000	hydrogenase, putative	5	2138.16	2582.67	2128	2178	1.01863	0.823952
Ld1S_050812100	viscerotropic leishmaniasis antigen, putative	5	2986.28	3836.93	1093	923	0.309081	0.284863
Ld1S_050812200	hypothetical protein	5	514.369	563.869	628	620	1.20536	1.11373
Ld1S_050812300	Ankyrin repeat, putative	5	1328.56	1635.98	1214	1101	0.828718	0.742061
Ld1S_050812400	hypothetical protein	5	1012.23	1370.95	1206	938	0.926663	0.879679
Ld1S_050812500	protein tyrosine phosphatase, putative	5	849.03	1072.11	3640	3312	3.90092	3.39516
Ld1S_050812600	ARP2/3 complex 16kDa subunit, putative	5	664.738	836.533	590	549	0.82589	0.705292
Ld1S_050812700	phosphate carrier protein, mitochondrial precursor-like protein	5	1690.73	2032.98	1615	1665	0.984784	0.794399
Ld1S_050812800	hypothetical protein	5	2901.01	3572.99	1322	1128	0.388831	0.369998
Ld1S_050812900	glutaredoxin-like protein	5	733.503	959.777	532	373	0.508518	0.554295
Ld1S_050813000	hypothetical protein	5	110.026	150.511	80	70	0.636216	0.531524
Ld1S_050813100	DNA replication licensing factor, putative	5	3349.36	4561.12	1343	948	0.283039	0.294445
Ld1S_050813200	hypothetical protein	5	1282.71	1743.96	963	878	0.684486	0.552192
Ld1S_050813300	trypanothione reductase	5	1555.03	2022.08	7723	7829	5.03464	3.81934
Ld1S_050813400	ATP-dependent RNA helicase, putative	5	2228.93	2552.14	806	379	0.170036	0.315814
Ld1S_050813500	hypothetical protein	5	1187.36	1413.49	847	654	0.550802	0.599226
Ld1S_050813600	microtubule-associated protein, putative (fragment)	5	5443.51	6557.02	2648	2615	0.480388	0.403842
Ld1S_050813700	protein kinase, putative	5	2456.32	3117.1	2193	1675	0.681914	0.70354
Ld1S_050813800	structural maintenance of chromosome (SMC), putative	5	3991.18	4806.52	2622	2028	0.508121	0.545509
Ld1S_050813900	TPR repeat, putative	5	2882.67	3668.97	1139	722	0.250462	0.310442
Ld1S_050814000	dynein-light chain-protein, putative	5	443.77	604.223	371	319	0.718842	0.614011
Ld1S_050814100	hypothetical protein	5	2232.6	2743	821	715	0.320254	0.299307
Ld1S_050814200	hypothetical protein	5	2926.68	3761.67	1016	674	0.230295	0.270093
Ld1S_050814300	hypothetical protein	5	774.763	963.049	10049	9339	12.054	10.4346
Ld1S_050814400	GTPase, putative	5	1963.96	2552.14	832	368	0.187377	0.326002
Ld1S_050814500	hypothetical protein	5	1144.27	1409.13	591	466	0.407248	0.419408
Ld1S_050814600	monocarboxylate transporter-like protein	5	1981.38	2488.88	1183	951	0.479969	0.475315
Ld1S_050814700	hypothetical protein	5	683.992	856.165	1305	1095	1.6009	1.52424
Ld1S_050815000	ATP synthase F1, alpha subunit, putative	5	1899.77	2310.01	387	307	0.161598	0.167532
Ld1S_050815100	nuclear receptor binding factor-like protein	5	1222.2	1502.92	688	516	0.422189	0.457774
Ld1S_050815200	kinetoplast-associated protein-like protein	5	6620.79	8011.96	2605	1892	0.285767	0.325139
Ld1S_050815300	u6 snrna-associated sm-like protein lsm3	5	628.062	766.731	541	444	0.706936	0.705593
Ld1S_050815400	protein kinase, putative	5	1086.5	1333.87	765	665	0.612056	0.573518
Ld1S_050815500	hypothetical protein	5	1632.05	1890.11	570	383	0.234675	0.30157
Ld1S_050815600	hypothetical protein	5	1371.65	1685.06	1120	971	0.707906	0.664663
Ld1S_050815700	hypothetical protein	5	2505.83	3210.89	2560	2143	0.855205	0.797286
Ld1S_050815800	ATP-dependent RNA helicase, putative	5	3614.34	4257.92	1240	785	0.217191	0.291222
Ld1S_050815900	COG4 transport protein, putative	5	2882.67	3623.16	1120	619	0.214732	0.309122
Ld1S_050816000	Surp module, putative	5	3300.77	4261.19	1065	622	0.188441	0.24993
Ld1S_050816100	hypothetical protein	5	3032.12	3952.54	1300	907	0.299131	0.328903
Ld1S_050816200	kinesin, putative	5	4158.05	5101	2754	2273	0.546651	0.539894
Ld1S_050816300	Ankyrin repeats (many copies)/Ankyrin repeats (3 copies), putative	5	6205.44	7761.11	2445	1728	0.278465	0.315032
Ld1S_050816400	hypothetical protein	5	3077.05	3748.58	1193	854	0.277539	0.318253
Ld1S_050816500	nitroreductase-like protein	5	1223.12	1561.82	749	506	0.413697	0.479569
Ld1S_050816600	hypothetical protein	5	7863.16	10038.4	2438	1744	0.221794	0.242867
Ld1S_050816700	sre-2/carboxylate carrier-like protein	5	1314.8	1530.19	891	565	0.429722	0.58228
Ld1S_050816800	Sperm-tail PG-rich repeat, putative	5	8906.57	11152	2814	1558	0.174927	0.252332
Ld1S_050816900	hypothetical protein	5	5932.21	7406.65	1407	867	0.146151	0.189965
Ld1S_050817000	CYC2-like cyclin, putative	5	4632.07	5856.82	4792	3063	0.661259	0.818191
Ld1S_050817100	phophatase-like protein	5	4611.9	5818.65	1867	1287	0.279061	0.320865
Ld1S_050817200	hypothetical protein	5	2632.36	3175.99	1357	839	0.318725	0.427268
Ld1S_050817300	Vta1 like, putative	5	1364.32	1631.62	897	666	0.488157	0.54976
Ld1S_050817400	Flavodoxin/Radical SAM superfamily/Wyosine base formation, putative	5	2896.42	3372.31	1389	886	0.305895	0.411884
Ld1S_050817500	kinesin-like protein	5	4617.4	5492.54	3473	2821	0.610949	0.632312
Ld1S_050817600	hypothetical protein	5	4623.82	5712.86	1550	809	0.174963	0.271318
Ld1S_050817700	hypothetical protein	5	550.128	640.215	1438	1135	2.06316	2.24612
Ld1S_050817800	Mitochondrial glycoprotein, putative	5	1301.05	1748.32	1072	938	0.720955	0.613159
Ld1S_050817900	MYND zinc finger (ZnF) domain-like protein	5	1747.57	2179.13	699	485	0.277528	0.32077
Ld1S_050818000	Got1/Sft2-like family, putative	5	633.564	803.814	613	550	0.868105	0.762615
Ld1S_050818100	hypothetical protein	5	3189.82	3915.46	951	440	0.137939	0.242884
Ld1S_050818200	methylthioadenosine phosphorylase, putative	5	1073.67	1264.07	3332	2520	2.3471	2.63593
Ld1S_050818300	hypothetical protein	5	4481.71	5982.25	2046	1657	0.369725	0.342012
Ld1S_050818400	zinc-finger of a C2HC-type, putative	5	2741.47	3350.5	1293	743	0.271023	0.385913
Ld1S_050818500	hypothetical protein	5	757.342	801.632	418	348	0.459502	0.521436
Ld1S_050818600	hypothetical protein	5	6467.67	8093.76	1906	1287	0.19899	0.23549
Ld1S_050818700	hypothetical protein	5	773.846	925.967	974	826	1.0674	1.05187
Ld1S_050818800	CPSF A subunit region, putative	5	6545.6	8115.57	3368	1767	0.269952	0.415005
Ld1S_050818900	surface antigen-like protein	5	1042.49	1202.99	805	1095	1.05037	0.669164
Ld1S_050819000	hypothetical protein	5	3684.02	4453.15	1142	789	0.214168	0.256448
Ld1S_050819100	paraflagellar rod protein, putative	5	3642.76	4753.08	1887	1600	0.439227	0.397006
Ld1S_050819200	ubiquitin-conjugating enzyme E2, putative	5	1625.63	2019.9	731	472	0.29035	0.3619
Ld1S_050819300	syndrome nuclear autoantigen 1. Function unknown	5	4358.84	5355.12	1892	1450	0.332657	0.353307
Ld1S_050819400	glutaminyl cyclase, putative	5	3132.98	3916.55	2761	2807	0.895953	0.704958
Ld1S_050819500	dipeptidyl-peptidase III, putative	5	2314.2	2776.81	3442	3362	1.45277	1.23955
Ld1S_050819800	3-mercaptopyruvate sulfurtransferase	5	1290.97	1652.34	961	607	0.470191	0.581598
Ld1S_050819900	NADH-ubiquinone oxidoreductase, mitochondrial, putative	5	1548.61	2043.89	1472	1332	0.860127	0.720195
Ld1S_050820000	hypothetical protein	5	385.089	503.883	160	123	0.319406	0.317534
Ld1S_050820100	hypothetical protein	5	449.271	598.77	466	382	0.850267	0.778262
Ld1S_050820200	methyltransferase-like protein	5	2218.85	2811.71	692	391	0.176218	0.246113
Ld1S_050820300	Coiled-coil domain containing 135. Function unknown	5	2760.72	3395.21	1761	1352	0.489727	0.518672
Ld1S_050820400	hypothetical protein	5	628.979	656.575	1354	1213	1.92852	2.06222
Ld1S_050820500	stomatin-like protein	5	1225.87	1565.09	2322	1989	1.62252	1.48362
Ld1S_050820600	hypothetical protein	5	1483.51	1850.84	585	673	0.453654	0.316072
Ld1S_050820700	ATPase, putative	5	1494.51	2031.89	1555	1283	0.858473	0.765296
Ld1S_050820800	Legume-like lectin family, putative	5	1843.84	2342.73	1753	1554	0.842804	0.748273
Ld1S_050820900	Phosphatidylinositol 4-phosphate 5-kinase, putative	5	2439.82	3018.94	1812	1410	0.577912	0.600211
Ld1S_050821000	double-strand-break repair protein rad21 homolog, putative	5	2196.84	2785.54	1118	858	0.39056	0.401359
Ld1S_050821100	methyltransferase domain containing protein, putative	5	981.978	1216.08	911	1175	1.19656	0.749127
Ld1S_050821200	RRM domain-containing protein	5	4268.07	5309.31	10511	10028	2.34954	1.97973
Ld1S_050821300	hypothetical protein	5	480.445	650.031	160	172	0.358002	0.246142
Ld1S_050821400	hypothetical protein	5	2043.72	2720.1	392	247	0.120858	0.144113
Ld1S_050821500	V-type proton ATPase subunit D, putative	5	1477.09	1525.83	638	512	0.346627	0.418134
Ld1S_050821600	hypothetical protein	5	2930.35	3584.99	485	388	0.132408	0.135286
Ld1S_050821700	DNA topoisomerase type IB small subunit. Replication, recombination and repair	5	674.823	738.374	388	274	0.406032	0.525479
Ld1S_050821800	elongation of very long chain fatty acids protein, putative	5	804.103	994.678	853	679	0.844419	0.857564
Ld1S_050821900	hypothetical protein	5	1708.15	2035.16	725	515	0.301496	0.356237
Ld1S_050822000	hypothetical protein	5	6236.61	7626.96	1542	1029	0.164993	0.202178
Ld1S_050822100	prefoldin subunit, putative	5	595.972	744.918	854	798	1.33899	1.14643
Ld1S_050822200	protein phosphatase type 1 regulator-like protein	5	1311.14	1597.81	477	416	0.317282	0.298533
Ld1S_050822300	surface antigen-like protein	5	965.474	1200.81	589	604	0.625599	0.490501
Ld1S_050829800	Leucine Rich repeats (2 copies), putative	5	1915.36	2389.63	1	4	0.00208838	0.000418475
Ld1S_060829900	histone H4	6	407.094	436.262	11116	13733	33.7342	25.4801
Ld1S_060830000	Leucine-rich repeat protein. Function unknown	6	1371.65	1382.95	474	539	0.392957	0.342745
Ld1S_060830100	WD domain, G-beta repeat, putative	6	1822.76	1758.14	2792	2843	1.55973	1.58804
Ld1S_060830200	39S mitochondrial ribosomal protein L46, putative	6	800.436	834.352	898	897	1.12064	1.07628
Ld1S_060830300	pumilio/PUF RNA binding protein 5, putative	6	1244.21	1238.99	1047	1148	0.922677	0.845046
Ld1S_060830400	tRNA methyltransferase 61 homolog. Translation, ribosomal structure and biogenesis	6	871.035	989.225	269	356	0.408709	0.27193
Ld1S_060830500	hypothetical protein	6	1290.97	1238.99	473	567	0.439206	0.381764
Ld1S_060830600	ATP-binding cassette protein subfamily G, member 2 (fragment);ATP-binding cassette protein subfamily G, member 3, putative;ATP-binding cassette protein subfamily G, member 1, putative (fragment)	6	1742.99	1752.68	121	103	0.0590939	0.069037
Ld1S_060830700	ATP-binding cassette protein subfamily G, member 2 (fragment);ATP-binding cassette protein subfamily G, member 3, putative;ATP-binding cassette protein subfamily G, member 1, putative (fragment)	6	1855.76	1702.51	371	282	0.151959	0.217913
Ld1S_060830800	ATP-binding cassette protein subfamily G, member 2 (fragment);ATP-binding cassette protein subfamily G, member 3, putative;ATP-binding cassette protein subfamily G, member 1, putative (fragment)	6	1013.15	922.695	68	73	0.0720524	0.0736972
Ld1S_060830900	hypothetical protein	6	1773.24	1614.17	1299	1211	0.682929	0.804747
Ld1S_060831000	cyclophilin	6	612.475	544.237	1931	2672	4.36262	3.54808
Ld1S_060831100	Domain of unknown function (DUF1768), putative	6	584.969	547.509	502	596	1.01886	0.916879
Ld1S_060831200	proteasome beta 6 subunit, putative	6	732.587	658.756	1369	1581	2.15811	2.07816
Ld1S_060831300	hypothetical protein	6	441.019	352.282	260	345	0.782279	0.738045
Ld1S_060831400	HD domain containing protein, putative	6	1183.69	1128.83	620	624	0.527165	0.549242
Ld1S_060831500	Trm112p-like protein, putative	6	551.044	508.246	163	131	0.23773	0.320711
Ld1S_060831600	kinesin-like protein	6	1718.23	1681.79	871	1056	0.614585	0.5179
Ld1S_060831700	hypothetical protein	6	1735.65	1749.41	463	379	0.218362	0.26466
Ld1S_060831800	hypothetical protein	6	1301.97	1453.84	661	744	0.571442	0.454657
Ld1S_060831900	hypothetical protein	6	297.069	298.84	247	265	0.892049	0.82653
Ld1S_060832000	tRNA	6	193.462	175.596	66	116	0.599602	0.375864
Ld1S_060832100	FHA domain containing protein, putative	6	1891.52	1719.96	579	492	0.260108	0.336635
Ld1S_060832200	calcium-dependent protein kinase. Signal transduction mechanisms	6	636.314	748.19	655	770	1.21009	0.875446
Ld1S_060832300	hypothetical protein	6	989.313	1043.76	512	444	0.448796	0.490535
Ld1S_060832400	Present in the outer mitochondrial membrane proteome 34	6	2355.46	2389.63	1383	1446	0.613892	0.578751
Ld1S_060832500	hypothetical protein	6	777.514	869.253	865	975	1.254	0.995107
Ld1S_060832600	5'-3' exoribonuclease A, putative	6	3975.59	4031.06	1723	1458	0.366738	0.42743
Ld1S_060832700	hypothetical protein	6	942.552	954.324	601	712	0.755396	0.629765
Ld1S_060832800	FHA domain-containing protein	6	2287.61	2380.9	675	605	0.264468	0.283506
Ld1S_060832900	ribonuclease H1, putative	6	693.161	754.734	451	449	0.647757	0.597562
Ld1S_060833000	MYND finger domain-like protein	6	484.112	518.062	531	568	1.17328	1.02497
Ld1S_060833100	folate/biopterin transporter, putative;biopterin transporter, putative;pteridine transporter, putative;folate/biopterin transporter, putative (fragment)	6	1848.43	1826.85	770	1400	0.7574	0.421491
Ld1S_060833200	hypothetical protein	6	2727.72	2683.01	1400	1594	0.584372	0.521801
Ld1S_060833300	hypothetical protein	6	3291.6	3129.09	844	848	0.257626	0.269727
Ld1S_060833400	oligopeptidase B-like protein	6	2332.54	2211.85	1509	1588	0.680803	0.682234
Ld1S_060833500	NAD(P)-dependent steroid dehydrogenase protein, putative	6	1012.23	1189.91	1538	2153	2.12698	1.29254
Ld1S_060833600	hypothetical protein	6	1196.53	1306.61	891	1045	0.873361	0.681919
Ld1S_060833700	glutamine synthetase, putative	6	920.547	1110.29	3267	4588	4.98399	2.94248
Ld1S_060833800	Present in the outer mitochondrial membrane proteome 35	6	1147.02	1083.02	749	788	0.687	0.691584
Ld1S_060833900	hypothetical protein	6	2474.66	2346	1076	1261	0.509566	0.458653
Ld1S_060834000	Fructose-bisphosphate aldolase class-I, putative	6	397.009	356.645	181	171	0.430721	0.507508
Ld1S_060834100	60S ribosomal protein L19, putative	6	936.134	917.242	1686	1273	1.35985	1.83812
Ld1S_060834200	hypothetical protein	6	617.06	667.482	505	621	1.00639	0.756575
Ld1S_060834300	60S ribosomal protein L19, putative	6	664.738	596.589	982	806	1.21251	1.64602
Ld1S_060834400	hypothetical protein	6	1692.56	1588	550	607	0.358629	0.346349
Ld1S_060834500	hypothetical protein	6	1938.28	1963.18	870	841	0.433889	0.443158
Ld1S_060834600	hypothetical protein	6	2678.2	2736.46	1036	947	0.353595	0.378592
Ld1S_060834700	Zinc finger protein. Signal transduction mechanisms	6	1356.06	1259.71	1205	1700	1.25363	0.956571
Ld1S_060834800	ATP-NAD kinase-like protein	6	3595.08	3242.52	1145	1043	0.290118	0.35312
Ld1S_060834900	condensin complex subunit 2, putative	6	3279.68	3113.82	1513	1380	0.420773	0.485898
Ld1S_060835000	hypothetical protein	6	1091.09	1050.3	613	746	0.683722	0.583642
Ld1S_060835100	hypothetical protein	6	1360.65	1327.33	993	1075	0.790064	0.748119
Ld1S_060835200	SpoU rRNA Methylase family, putative	6	1625.63	1597.81	342	305	0.18762	0.214043
Ld1S_060835300	U-box domain containing protein, putative	6	2014.38	2067.88	501	514	0.255165	0.242277
Ld1S_060835400	Leucine-rich repeat protein. Function unknown	6	5122.6	5143.53	828	1087	0.212197	0.160979
Ld1S_060835500	hypothetical protein	6	909.544	809.267	528	545	0.599201	0.652442
Ld1S_060835600	basic, immunoglobulin-like variable motif containing. Function unknown	6	2275.69	2150.77	698	762	0.334843	0.324534
Ld1S_060835700	hypothetical protein	6	4884.22	4837.06	1108	897	0.183653	0.229065
Ld1S_060835800	deoxyuridine triphosphatase, putative	6	794.017	782	5756	6749	8.49981	7.36061
Ld1S_060835900	60S ribosomal protein L23a, putative	6	425.432	441.716	1317	1598	3.75618	2.98156
Ld1S_060836000	60S ribosomal protein L23a, putative	6	474.027	485.342	4212	5047	10.6471	8.67842
Ld1S_060836100	hypothetical protein	6	4003.1	4013.61	1106	1139	0.28453	0.275562
Ld1S_060836200	hypothetical protein	6	4306.58	4032.16	822	828	0.192264	0.203861
Ld1S_060836300	carbonic anhydrase family protein, putative	6	964.557	838.715	714	888	0.92063	0.851303
Ld1S_060836400	Putative Phosphatase/Protein of unknown function DUF89, putative	6	2928.51	2914.23	1415	970	0.331226	0.485548
Ld1S_060836500	hypothetical protein	6	4748.52	4657.1	1983	2459	0.517846	0.425801
Ld1S_060836600	protein kinase, putative	6	8591.16	8521.3	2201	1948	0.226745	0.258294
Ld1S_060836700	lanosterol synthase, putative	6	2657.12	2521.6	1495	1930	0.726351	0.592878
Ld1S_060836800	hypothetical protein	6	2073.98	1777.77	757	730	0.35198	0.425815
Ld1S_060836900	hypothetical protein	6	3405.29	3473.74	1305	1447	0.424927	0.375676
Ld1S_060837000	hypothetical protein	6	759.176	801.632	489	465	0.612506	0.610005
Ld1S_060837100	hypothetical protein	6	1138.76	1179	776	694	0.609433	0.658185
Ld1S_060837200	hypothetical protein	6	6595.11	6543.94	2678	2038	0.309017	0.409234
Ld1S_060837300	C2 domain/Ankyrin repeats (3 copies), putative	6	2121.66	2059.16	1358	1286	0.60613	0.659493
Ld1S_060837400	hypothetical protein	6	1446.84	1534.55	241	196	0.135468	0.157049
Ld1S_060837500	YEATS family, putative	6	4853.04	5002.84	1635	1398	0.288067	0.326814
Ld1S_060837600	threonine ammonia-lyase	6	1039.74	1086.29	670	703	0.67613	0.616776
Ld1S_060837700	hypothetical protein	6	3005.53	2945.86	820	641	0.213274	0.278357
Ld1S_060837800	Haemolysin-III related, putative	6	2097.82	1841.03	422	386	0.184001	0.22922
Ld1S_060837900	hypothetical protein	6	3110.97	3184.72	838	714	0.22951	0.263132
Ld1S_060838000	Double RNA binding domain protein 12	6	5537.95	5380.21	989	1147	0.207116	0.183822
Ld1S_060838100	hypothetical protein	6	9023.01	8499.48	1930	2348	0.260224	0.227073
Ld1S_060838200	hypothetical protein	6	2955.1	2928.41	1228	1028	0.347873	0.41934
Ld1S_060838300	hypothetical protein	6	4660.5	4250.29	1011	944	0.202553	0.237866
Ld1S_060838400	hypothetical protein	6	8594.83	8736.16	2483	2332	0.271326	0.284221
Ld1S_060838500	Qb-SNARE protein, putative	6	1081	1060.12	185	156	0.144311	0.174509
Ld1S_060838600	lipin, putative	6	3750.04	3456.29	1347	1129	0.301064	0.389724
Ld1S_060838700	hypothetical protein	6	766.511	718.742	461	511	0.666657	0.641398
Ld1S_060838800	hypothetical protein	6	9453.94	9015.36	3928	3945	0.417286	0.435701
Ld1S_060838900	dihydrofolate reductase-thymidylate synthase	6	1461.51	1442.94	1356	1931	1.32124	0.939749
Ld1S_060839000	protein arginine n-methyltransferase 7	6	1204.78	1008.86	531	476	0.395093	0.526338
Ld1S_060839100	acyl-coenzyme a dehydrogenase, putative	6	1022.32	1045.94	2599	2743	2.68311	2.48485
Ld1S_060839200	hypothetical protein	6	1988.71	1945.73	726	725	0.364558	0.373125
Ld1S_060839300	protein phosphatase 2C, putative	6	4682.5	4604.75	1198	1252	0.267378	0.260166
Ld1S_060839400	peptidyl-tRNA hydrolase, putative	6	774.763	787.454	476	684	0.882851	0.60448
Ld1S_060839500	hypothetical protein	6	1250.62	1379.68	525	408	0.326237	0.380523
Ld1S_060839600	2,4-dienoyl-coa reductase-like protein	6	2162.92	2315.46	771	778	0.359699	0.332979
Ld1S_060839700	TLD, putative	6	1685.22	1750.5	410	449	0.266433	0.234218
Ld1S_060839800	glucosamine-fructose-6-phosphate aminotransferase, putative	6	1720.07	1713.42	665	844	0.490679	0.388113
Ld1S_060839900	cell cycle associated protein MOB1, putative	6	690.41	655.484	662	829	1.20074	1.00994
Ld1S_060840000	Domain of unknown function (DUF3883), putative	6	4416.61	4506.59	811	659	0.14921	0.179959
Ld1S_060840100	Leucine Rich Repeat, putative	6	2678.2	2677.56	1514	1684	0.628779	0.56544
Ld1S_060840200	WD domain, G-beta repeat, putative	6	3362.2	3337.41	974	800	0.23794	0.291843
Ld1S_060840300	hypothetical protein	6	472.193	459.166	172	186	0.393907	0.374592
Ld1S_060840400	SET domain containing protein, putative	6	1349.65	1393.86	428	377	0.279332	0.307061
Ld1S_060840500	hypothetical protein	6	1932.78	1915.19	500	465	0.240586	0.26107
Ld1S_060840600	G-patch domain containing protein, putative	6	750.007	787.454	682	678	0.903991	0.866083
Ld1S_060840700	kinesin, putative	6	2251.86	2495.42	856	911	0.404555	0.343028
Ld1S_060840800	hypothetical protein	6	2026.3	2018.8	914	886	0.437249	0.452743
Ld1S_060840900	protein disulfide isomerase	6	490.53	492.977	1279	2024	4.12615	2.59444
Ld1S_060841000	2OG-Fe(II) oxygenase superfamily, putative	6	1051.66	1145.19	544	584	0.555312	0.475031
Ld1S_060841100	deoxyribose-phosphate aldolase, putative	6	837.111	872.525	747	930	1.11096	0.856136
Ld1S_060841200	Staphylococcal nuclease homologue, putative	6	764.677	834.352	442	677	0.885341	0.529752
Ld1S_060841300	hypothetical protein	6	1590.79	1556.37	445	379	0.238247	0.285922
Ld1S_060841400	peripherally associated ATOM36	6	992.063	1043.76	509	470	0.47376	0.487661
Ld1S_060841500	hypothetical protein	6	3107.3	3117.1	1223	1154	0.371383	0.392352
Ld1S_060841600	hypothetical protein	6	881.121	808.176	403	452	0.512983	0.498654
Ld1S_060841700	WD domain, G-beta repeat, putative	6	1062.66	984.862	418	546	0.513803	0.424425
Ld1S_060841800	hypothetical protein	6	2065.73	2140.96	660	654	0.316595	0.308273
Ld1S_060841900	Domain of unknown function (DUF4379), putative	6	1350.56	1517.1	480	418	0.309501	0.316393
Ld1S_060842000	hypothetical protein	6	3180.65	3249.06	781	778	0.244604	0.240377
Ld1S_060842100	mRNA transport regulator MTR2, putative	6	380.505	361.007	475	450	1.18264	1.31576
Ld1S_060842200	protein kinase, putative	6	1191.03	1189.91	974	1119	0.939526	0.818552
Ld1S_060842300	thioredoxin, putative	6	634.48	627.127	549	908	1.43109	0.87542
Ld1S_060842400	hypothetical protein	6	363.084	426.447	170	220	0.60592	0.398643
Ld1S_060842500	hypothetical protein	6	414.429	390.455	110	118	0.284729	0.281723
Ld1S_060842600	hypothetical protein	6	1094.75	1170.27	197	169	0.154373	0.168337
Ld1S_060842700	hypothetical protein	6	1798.92	1982.81	537	470	0.261268	0.270827
Ld1S_060842800	hypothetical protein	6	2091.4	2259.84	506	596	0.284976	0.22391
Ld1S_060842900	Protein of unknown function (DUF1637), putative	6	871.952	918.332	259	333	0.381902	0.282033
Ld1S_060843000	FAD binding domain containing protein, putative	6	1387.24	1457.12	811	946	0.68193	0.556579
Ld1S_060843100	Transcription factor e(y)2, putative	6	554.712	544.237	212	262	0.472317	0.389536
Ld1S_060843200	hypothetical protein	6	657.402	678.388	473	542	0.824457	0.697241
Ld1S_060843300	hypothetical protein	6	583.135	619.493	338	508	0.871153	0.545608
Ld1S_060843400	folate/biopterin transporter, putative;biopterin transporter, putative;pteridine transporter, putative;folate/biopterin transporter, putative (fragment)	6	1761.33	1863.93	2738	984	0.55867	1.46894
Ld1S_060843500	coproporphyrinogen III oxidase	6	860.033	816.901	937	510	0.593001	1.14702
Ld1S_060843600	protoporphyrinogen oxidase-like protein	6	717.917	679.479	352	130	0.18108	0.518044
Ld1S_060843700	Cytochrome b5-like Heme/Steroid binding domain containing protein, putative	6	358.5	346.829	162	39	0.108787	0.467089
Ld1S_060843800	CLN3 protein, putative	6	1739.32	1814.85	185	245	0.14086	0.101937
Ld1S_070843900	Ubiquitin-like modifier-activating enzyme ATG7, putative	7	2016.22	2219.49	494	451	0.223686	0.222574
Ld1S_070844000	Isy1-like splicing family, putative	7	900.375	977.228	440	586	0.65084	0.450253
Ld1S_070844100	histone-lysine N-methyltransferase, putative	7	869.202	889.975	2891	4048	4.65715	3.2484
Ld1S_070844200	Peptidase dimerisation domain containing protein, putative	7	782.098	894.338	1876	2423	3.09808	2.09764
Ld1S_070844300	hypothetical protein	7	926.048	880.159	837	1009	1.08958	0.950964
Ld1S_070844400	alpha-adaptin-like protein	7	2625.03	2729.91	1312	1123	0.427805	0.480602
Ld1S_070844500	cytochrome c1, heme protein, mitochondrial, putative	7	724.335	766.731	3855	3511	4.84721	5.02784
Ld1S_070844600	hypothetical protein	7	573.966	548.6	951	1049	1.82763	1.7335
Ld1S_070844700	Golgi/lysosome glycoprotein 1, putative	7	1580.7	1634.89	1145	1416	0.895806	0.700351
Ld1S_070844800	cobalamin-dependent methionine synthase, putative	7	3422.71	3438.84	3648	4439	1.29693	1.06082
Ld1S_070844900	pitrilysin-like metalloprotease	7	2644.28	2871.7	1528	1274	0.481795	0.532089
Ld1S_070845000	mitochondrial calcium uptake 1, putative	7	1032.41	1014.31	516	639	0.618942	0.50872
Ld1S_070845100	Sec7 domain containing protein, putative	7	5972.55	6002.97	1633	1437	0.240601	0.272032
Ld1S_070845200	tRNA-methyl transferase, putative	7	1846.59	1727.6	287	261	0.141341	0.166126
Ld1S_070845300	hypothetical protein	7	1074.58	1117.92	539	556	0.51741	0.482144
Ld1S_070845400	Eukaryotic membrane protein family, putative	7	1843.84	1953.37	764	704	0.381811	0.39112
Ld1S_070845500	protein kinase, putative	7	2427.9	2520.51	603	500	0.20594	0.239238
Ld1S_070845600	hypothetical protein	7	485.946	407.905	109	166	0.341602	0.267219
Ld1S_070845700	protein kinase, putative	7	3152.23	3080.01	623	908	0.28805	0.202272
Ld1S_070845800	hypothetical protein	7	5796.51	5829.56	331	238	0.0410592	0.0567796
Ld1S_070845900	protein phosphatase 2A, regulatory subunit B, putative	7	1143.35	1199.72	548	617	0.539643	0.456773
Ld1S_070846000	phosphatidylglycerolphosphate synthase, mitochondrial, putative	7	2074.9	2077.7	962	941	0.453516	0.463012
Ld1S_070846100	hypothetical protein	7	952.638	1013.22	227	297	0.311766	0.224038
Ld1S_070846200	hypothetical protein	7	1720.98	1893.38	1984	1714	0.995943	1.04786
Ld1S_070846300	Cytokine-induced anti-apoptosis inhibitor 1, Fe-S biogenesis, putative	7	470.359	438.444	362	411	0.8738	0.825648
Ld1S_070846400	hypothetical protein	7	1770.49	1694.88	696	670	0.378425	0.410649
Ld1S_070846500	protein kinase, putative	7	5133.61	4786.89	1450	1541	0.300179	0.302911
Ld1S_070846600	homoserine dehydrogenase-like protein	7	1058.08	968.503	386	338	0.319447	0.398553
Ld1S_070846700	acetylornithine deacetylase-like protein	7	1091.09	1017.58	688	964	0.883523	0.676113
Ld1S_070846800	ubiquitin-protein ligase-like, putative	7	17078.7	17313.1	3212	2819	0.165059	0.185525
Ld1S_070846900	Uncharacterised protein family (UPF0172), putative	7	907.711	850.712	1078	1213	1.33633	1.26717
Ld1S_070847000	hypothetical protein	7	2492.99	2404.9	930	857	0.343763	0.386711
Ld1S_070847100	paraflagellar rod protein, putative	7	2258.27	2183.49	1344	1680	0.743931	0.615527
Ld1S_070847200	hypothetical protein	7	2760.72	2858.61	1190	1224	0.443362	0.416286
Ld1S_070847300	Protein of unknown function (DUF3735)/Abscisic acid G-protein coupled receptor, putative	7	2481.99	2427.8	985	1099	0.442789	0.405717
Ld1S_070847400	NUDIX family hydrolase, putative	7	2265.61	2135.5	522	561	0.247616	0.244439
Ld1S_070847500	ATP-dependent DEAD H RNA helicase. RNA processing and modification	7	520.787	583.501	738	534	1.02537	1.26478
Ld1S_070847600	ATP-dependent RNA helicase DBP2B, putative;ATP-dependent RNA helicase DBP2A, putative	7	1521.1	1518.19	3347	3175	2.0873	2.20459
Ld1S_070847700	hypothetical protein	7	1703.56	1711.24	1099	1006	0.590527	0.642225
Ld1S_070847800	Protein of unknown function (DUF1674), putative	7	517.12	507.155	339	438	0.846999	0.668435
Ld1S_070847900	Zinc finger, C3HC4 type (RING finger), putative	7	2503.08	2509.6	171	307	0.122649	0.0681384
Ld1S_070848000	RAVE protein 1 C terminal, putative	7	9628.15	9367.65	2038	2120	0.220188	0.217557
Ld1S_070848100	hypothetical protein	7	2515	2424.53	633	694	0.275944	0.261082
Ld1S_070848200	EamA-like transporter family, putative	7	1731.07	1543.28	485	588	0.339675	0.314266
Ld1S_070848300	hypothetical protein	7	1580.7	1305.52	414	475	0.3005	0.317116
Ld1S_070848400	hypothetical protein	7	383.256	338.103	743	1181	3.08149	2.19755
Ld1S_070848500	maoc family dehydratase-like protein	7	501.533	482.07	1417	2000	3.98777	2.93941
Ld1S_070848600	maoc family dehydratase-like protein	7	495.115	514.79	512	497	1.00381	0.994581
Ld1S_070848700	hypothetical protein	7	544.626	491.886	562	685	1.25774	1.14254
Ld1S_070848800	acyl-CoA dehydrogenase, mitochondrial precursor, putative	7	1502.77	1452.75	1597	1520	1.01147	1.09929
Ld1S_070848900	pre-rrna-processing protein tsr1 homolog	7	2243.6	2185.67	880	732	0.326261	0.402622
Ld1S_070849100	hypothetical protein	7	553.795	568.232	159	344	0.621168	0.279815
Ld1S_070849200	Dynein heavy chain, N-terminal region 2, putative	7	12388	11662.4	2984	4131	0.333469	0.255865
Ld1S_070849300	hypothetical protein	7	1217.62	1096.11	699	693	0.569145	0.63771
Ld1S_070849400	60S ribosomal protein L7a, putative	7	842.612	773.275	675	1005	1.19272	0.87291
Ld1S_070849500	60S ribosomal protein L7a, putative	7	778.431	768.913	780	1105	1.41952	1.01442
Ld1S_070849600	QA-SNARE protein putative	7	682.158	654.394	690	785	1.15076	1.05441
Ld1S_070849700	adp/ATP carrier-like protein	7	914.129	909.607	400	461	0.504305	0.43975
Ld1S_070849800	hypothetical protein	7	2974.36	2665.56	766	624	0.209793	0.287369
Ld1S_070849900	cysteine peptidase B (CPB)	7	4185.55	3822.75	1044	1231	0.294107	0.273102
Ld1S_070850000	ras-related protein rab-14, putative	7	714.249	700.201	588	681	0.953449	0.839759
Ld1S_070850100	Nucleolar protein 54, putative	7	1454.17	1373.14	1036	734	0.504755	0.754477
Ld1S_070850200	Molybdopterin guanine dinucleotide synthesis protein B, putative	7	4348.76	3976.53	1655	1508	0.346766	0.416192
Ld1S_070850300	Sel1 repeat, putative	7	4763.19	4436.79	1212	1111	0.233247	0.273171
Ld1S_070850400	electron transfer flavoprotein-ubiquinone oxidoreductase, putative	7	1482.59	1288.06	1102	1368	0.922707	0.855547
Ld1S_070850500	hypothetical protein	7	632.647	563.869	470	425	0.671781	0.833527
Ld1S_070850600	60S acidic ribosomal protein. Translation, ribosomal structure and biogenesis	7	785.766	702.383	604	701	0.892124	0.85993
Ld1S_070850700	hypothetical protein	7	1772.33	1803.95	1750	1671	0.942828	0.970096
Ld1S_070850800	vacuolar-type Ca2+-ATPase, putative (fragment)	7	2892.75	2780.08	755	851	0.294183	0.271575
Ld1S_070850900	eukaryotic translation initiation factor 3 subunit h	7	1010.4	900.882	2259	2253	2.22981	2.50754
Ld1S_070851000	vacuolar-type Ca2+-ATPase, putative (fragment)	7	3464.89	3311.23	351	312	0.0900462	0.106003
Ld1S_070851100	hypothetical protein	7	1455.09	1415.67	793	883	0.606836	0.560158
Ld1S_070851200	Qa-SNARE protein, putative	7	562.964	639.124	417	376	0.667894	0.652455
Ld1S_070851300	40S ribosomal protein S9, putative	7	584.052	514.79	3345	2201	3.7685	6.4978
Ld1S_070851400	protein kinase, putative	7	4403.77	4239.38	1216	1076	0.244336	0.286834
Ld1S_070851500	topoisomerase-related function protein-like protein	7	2673.62	2416.89	1123	910	0.340362	0.464646
Ld1S_070851600	centrin, putative	7	619.81	653.303	527	766	1.23586	0.80667
Ld1S_070851700	hypothetical protein	7	1707.23	1625.08	1076	1308	0.766154	0.662122
Ld1S_070851800	HEAT-like repeat, putative	7	3546.49	3439.93	1416	1113	0.313831	0.411636
Ld1S_070851900	malonyl-coa decarboxylase-like protein	7	2083.15	1917.37	363	324	0.155534	0.189321
Ld1S_070852000	hypothetical protein	7	9843.62	9981.68	2919	3356	0.340932	0.292436
Ld1S_070852100	protein phosphatase inhibitor, putative	7	534.541	523.515	356	379	0.70902	0.680019
Ld1S_070852200	Protein kinase domain containing protein, putative	7	386.923	379.548	106	150	0.387674	0.279279
Ld1S_070852300	hypothetical protein	7	993.897	888.885	467	616	0.619782	0.525377
Ld1S_070852400	6-phosphofructo-2-kinase-like protein	7	3377.78	3137.82	1167	1191	0.352598	0.371915
Ld1S_070852500	DNAJ-domain transmembrane-like protein	7	1250.62	1139.74	732	690	0.551725	0.642254
Ld1S_070852600	J domain-containing protein	7	906.794	942.327	474	523	0.576757	0.50301
Ld1S_070852700	dihydrolipoamide branched chain transacylase. Energy production and conversion	7	890.29	809.267	391	395	0.443676	0.483153
Ld1S_070852800	flavoprotein subunit-like protein	7	1842.01	1680.7	2967	3624	1.96742	1.76533
Ld1S_070853000	polyadenylate-binding protein 1. RNA processing and modification	7	940.718	839.805	579	827	0.879116	0.689446
Ld1S_070853100	phosphoacetylglucosamine mutase-like protein	7	1620.13	1528.01	1574	1789	1.10424	1.0301
Ld1S_070853200	cytochrome b5-like protein	7	218.217	203.953	410	556	2.54792	2.01027
Ld1S_070853300	hypothetical protein	7	6357.64	6229.83	880	989	0.155561	0.141256
Ld1S_070853400	hypothetical protein	7	5383.92	5202.43	422	738	0.137075	0.0811159
Ld1S_070853500	hypothetical protein	7	6335.64	6295.27	687	890	0.140475	0.10913
Ld1S_070853600	ubiquitin-conjugating enzyme E2, putative	7	573.966	595.498	790	940	1.63773	1.32662
Ld1S_070853700	hypothetical protein	7	3902.24	3760.58	1102	1294	0.331605	0.29304
Ld1S_070853800	splicing factor ptsr1-like protein	7	1591.7	1542.19	1527	1203	0.755795	0.990152
Ld1S_070853900	protein kinase, putative	7	3699.61	3490.1	930	912	0.246513	0.266468
Ld1S_070854000	hypothetical protein	7	1753.99	1757.05	789	1358	0.774235	0.449049
Ld1S_070854100	serine/threonine kinase-like protein, putative;serine/threonine kinase, putative	7	854.532	860.528	1152	1316	1.54003	1.33871
Ld1S_070854200	Hypothetical protein, conserved. Function unknown	7	4725.6	4551.31	1458	1519	0.321441	0.320347
Ld1S_070854300	hypothetical protein	7	1031.49	993.588	311	354	0.343193	0.313007
Ld1S_070854400	Protein of unknown function (DUF3608), putative	7	6286.12	5993.16	1882	1818	0.289208	0.314025
Ld1S_070854500	Radial spokehead-like protein, putative	7	1017.74	955.415	779	963	0.946218	0.815353
Ld1S_070854600	Domain of unknown function (DUF3437), putative	7	6480.5	6169.84	1790	1642	0.253375	0.290121
Ld1S_070854700	hypothetical protein	7	5380.25	5133.72	1036	1235	0.229543	0.201803
Ld1S_070854800	KH domain containing 3-like, subcortical maternal complex member. Function unknown	7	3187.99	3014.57	941	811	0.254392	0.31215
Ld1S_070854900	hypothetical protein	7	2420.56	2197.67	955	917	0.378838	0.434551
Ld1S_070855000	RNA binding protein, putative	7	353.915	395.908	444	506	1.42972	1.12147
Ld1S_070855100	nucleolar RNA-binding protein, putative	7	897.625	861.618	5097	3885	4.32809	5.91561
Ld1S_070855200	RNA binding protein-like protein	7	1001.23	1096.11	1531	1536	1.53411	1.39676
Ld1S_070855300	Domain of unknown function DUF59, putative	7	435.518	539.875	439	533	1.22383	0.813152
Ld1S_070855400	PIF1 helicase-like protein, putative	7	3489.64	3311.23	1219	1165	0.333845	0.368141
Ld1S_070855500	peptidyl-prolyl cis-trans isomerase/rotamase, putative	7	365.835	400.271	830	1293	3.53438	2.0736
Ld1S_070855600	hypothetical protein	7	583.135	585.682	264	274	0.469874	0.450756
Ld1S_070855700	hypothetical protein	7	629.896	623.855	406	589	0.935075	0.650792
Ld1S_070855800	Sel1 repeat, putative	7	969.141	968.503	440	541	0.558226	0.45431
Ld1S_070855900	cation-transporting ATPase, putative	7	3003.7	2868.43	3919	3731	1.24214	1.36625
Ld1S_070856000	Dpy-30 motif containing protein, putative	7	368.585	367.551	524	587	1.59257	1.42565
Ld1S_070856100	lipoate-protein ligase-like	7	1360.65	1403.67	737	794	0.583545	0.525051
Ld1S_070856200	RNA-editing complex protein, putative	7	1326.72	1350.23	687	614	0.462794	0.508801
Ld1S_070856300	hypothetical protein	7	2200.51	2291.47	1833	2274	1.0334	0.799924
Ld1S_070856400	fatty acid desaturase, putative	7	1068.16	1185.54	1024	1023	0.957718	0.863739
Ld1S_070856500	hypothetical protein	7	916.879	821.264	466	575	0.627127	0.567418
Ld1S_070856600	hypothetical protein	7	400.676	314.109	278	400	0.998312	0.885043
Ld1S_070856700	ATPase subunit 9, putative	7	403.427	406.815	910	919	2.27798	2.23689
Ld1S_070856800	hypothetical protein	7	1062.66	1141.92	1516	1910	1.79737	1.32759
Ld1S_070856900	proteasome regulatory non-ATP-ase subunit, putative	7	1031.49	1050.3	979	1100	1.06642	0.932113
Ld1S_070857000	Mitochondrial GTPase involved in mitochondrial trafficking (By similarity). Defense mechanisms	7	1589.87	1661.07	1313	1432	0.900703	0.790455
Ld1S_070857100	peptide methionine sulfoxide reductase-like	7	522.621	543.147	829	957	1.83115	1.52629
Ld1S_070857200	N-terminal region of Chorein, a TM vesicle-mediated sorter, putative	7	6423.66	6607.19	2522	2447	0.380936	0.381705
Ld1S_070857300	amino acid transporter 19, putative	7	1125.93	1416.76	11523	13053	11.5931	8.13333
Ld1S_080857400	adaptor complex protein (AP) 3 delta subunit 1, putative	8	2822.15	3036.39	2763	3338	1.18278	0.909963
Ld1S_080857500	hypothetical protein	8	764.677	713.289	740	727	0.950728	1.03745
Ld1S_080857600	vesicle-associated membrane protein, putative	8	651.901	663.119	917	1004	1.54011	1.38286
Ld1S_080857700	hypothetical protein	8	616.143	680.569	1393	1742	2.82727	2.04682
Ld1S_080857800	Translation elongation factor 1-beta. Translation, ribosomal structure and biogenesis	8	282.399	342.466	1037	1021	3.61545	3.02804
Ld1S_080857900	phosphoglycerate mutase protein, putative	8	577.634	567.141	606	779	1.3486	1.06852
Ld1S_080858000	Putative zinc finger motif, C2HC5-type/ASCH domain containing protein, putative	8	1585.28	1673.07	1239	1145	0.722268	0.740556
Ld1S_080858100	ATP-dependent DEAD/H RNA helicase, putative	8	1852.1	1778.86	1448	1544	0.83365	0.814004
Ld1S_080858200	adaptor complex protein (AP) 3 delta subunit 1, putative	8	2967.02	2852.07	1617	1546	0.521061	0.566957
Ld1S_080858300	dual-specificity protein phosphatase, putative	8	1251.54	1336.05	711	637	0.508973	0.532164
Ld1S_080858400	hypothetical protein	8	1629.29	1560.73	978	883	0.541952	0.62663
Ld1S_080858500	hypothetical protein	8	799.519	833.261	924	894	1.11817	1.1089
Ld1S_080858600	hypothetical protein	8	3062.38	3014.57	1613	1250	0.40818	0.535067
Ld1S_080858700	hypothetical protein	8	1600.87	1675.25	1325	1293	0.807685	0.790928
Ld1S_080858800	DNA repair protein, putative	8	3313.6	3364.67	1274	1219	0.367878	0.37864
Ld1S_080858900	GPI-GlcNAc transferase complex, PIG-H component, putative	8	1378.99	1422.22	795	665	0.482238	0.558987
Ld1S_080859000	hypothetical protein	8	700.496	701.292	1438	1886	2.69238	2.0505
Ld1S_080859100	hypothetical protein	8	1836.51	1844.3	153	137	0.074598	0.0829583
Ld1S_080859200	Bacterial transferase hexapeptide (six repeats), putative	8	834.36	859.437	500	578	0.692746	0.581776
Ld1S_080859300	hypothetical protein	8	2594.77	2573.95	748	652	0.251275	0.290604
Ld1S_080859400	Inositol phosphosphingolipids phospholipase C	8	1853.93	1669.79	764	736	0.396994	0.457541
Ld1S_080859500	Ubiquitin-protein ligase. Posttranslational modification, protein turnover, chaperones	8	1242.37	1394.95	484	517	0.41614	0.346966
Ld1S_080859600	ubiquitin-activating enzyme-like protein	8	2801.98	2918.6	1077	921	0.328696	0.369013
Ld1S_080859700	ABC1 family, putative	8	1331.31	1354.59	1120	1190	0.893857	0.826815
Ld1S_080859800	Ribosomal protein L9, N-terminal domain containing protein, putative	8	702.33	748.19	558	542	0.771717	0.7458
Ld1S_080859900	hypothetical protein	8	400.676	450.441	572	784	1.95669	1.26987
Ld1S_080860000	hypothetical protein	8	1119.51	1183.36	571	512	0.457343	0.482524
Ld1S_080860100	hypothetical protein	8	2257.36	2335.09	767	716	0.317185	0.328466
Ld1S_080860200	ribosomal protein L2, putative	8	952.638	1032.85	757	683	0.716957	0.732923
Ld1S_080860300	iron superoxide dismutase A, mitochondrial	8	632.647	554.053	2040	2575	4.0702	3.68196
Ld1S_080860400	Isochorismatase family, putative	8	743.589	722.014	408	457	0.614587	0.565086
Ld1S_080860500	Isochorismatase family, putative	8	873.786	975.047	544	561	0.642034	0.557922
Ld1S_080860600	mitochondrial associated ribonuclease, putative	8	803.186	703.473	1081	1617	2.01323	1.53666
Ld1S_080860700	Tim10/DDP family zinc finger, putative	8	384.172	358.826	604	727	1.89238	1.68327
Ld1S_080860800	hypothetical protein	8	12725.4	12576.4	2732	2297	0.180506	0.217233
Ld1S_080860900	hypothetical protein	8	4159.88	4031.06	778	725	0.174284	0.193001
Ld1S_080861000	hypothetical protein	8	1990.54	2085.33	658	568	0.285349	0.315537
Ld1S_080861100	hypothetical protein	8	620.727	626.037	622	727	1.17121	0.993552
Ld1S_080861200	hypothetical protein	8	4970.4	5200.25	1893	1957	0.393731	0.364021
Ld1S_080861300	hypothetical protein	8	5167.53	4941.76	1560	1305	0.252538	0.315677
Ld1S_080861400	hypothetical protein	8	3196.24	3179.26	1123	888	0.277826	0.353227
Ld1S_080861500	WD domain, G-beta repeat, putative	8	3534.57	3382.12	2456	2356	0.666559	0.726171
Ld1S_080861600	hypothetical protein	8	5025.42	4857.78	2138	1665	0.331316	0.440119
Ld1S_080861700	hypothetical protein	8	2543.42	2503.06	1325	924	0.36329	0.529353
Ld1S_080861800	hypothetical protein	8	6323.72	6046.6	2202	1572	0.248588	0.364172
Ld1S_080861900	signal peptidase type I, putative	8	466.692	526.787	490	557	1.19351	0.930167
Ld1S_080862000	hypothetical protein	8	836.194	812.539	992	1141	1.36452	1.22086
Ld1S_080862100	small ubiquitin protein, putative	8	403.427	316.29	417	549	1.36084	1.31841
Ld1S_080862200	hypothetical protein	8	828.859	705.654	576	606	0.731126	0.816264
Ld1S_080862300	hypothetical protein	8	1053.49	1095.02	437	385	0.36545	0.39908
Ld1S_080862400	NA. Cytoskeleton	8	965.474	988.134	327	321	0.332479	0.330927
Ld1S_080862500	ribose-phosphate pyrophosphokinase, putative	8	2054.73	2240.21	1771	1711	0.832714	0.790552
Ld1S_080862600	protein kinase (EC. Signal transduction mechanisms	8	6185.27	5761.94	1743	1519	0.245584	0.302502
Ld1S_080862700	protein kinase , putative	8	4570.64	4356.08	1263	1085	0.237385	0.28994
Ld1S_080862800	hypothetical protein	8	1044.33	966.321	826	1069	1.02363	0.854788
Ld1S_080862900	cyclopropane-fatty-acyl-phospholipid syntahse	8	1217.62	1341.51	377	405	0.332617	0.281027
Ld1S_080863000	translation initiation factor-like protein	8	913.212	924.876	3184	2555	2.79782	3.44262
Ld1S_080863100	hypothetical protein	8	724.335	651.122	778	700	0.966404	1.19486
Ld1S_080863200	hypothetical protein	8	636.314	570.413	182	302	0.474608	0.319067
Ld1S_080863300	hypothetical protein	8	526.289	520.243	159	162	0.307816	0.305626
Ld1S_080863400	hypothetical protein	8	1320.31	1141.92	286	484	0.366582	0.250456
Ld1S_080863500	hypothetical protein	8	404.344	400.271	90	150	0.370971	0.224848
Ld1S_080863600	hypothetical protein	8	482.279	499.52	273	287	0.595092	0.546524
Ld1S_080863700	hypothetical protein	8	7413.89	7081.63	2501	2456	0.33127	0.353167
Ld1S_080863800	hypothetical protein	8	5858.86	5728.13	2363	2479	0.42312	0.412526
Ld1S_080863900	Amastin surface glycoprotein, putative	8	750.924	793.998	7142	7625	10.1542	8.99499
Ld1S_080864000	DnaJ domain containing protein, putative	8	898.542	858.346	628	683	0.760121	0.731639
Ld1S_080864100	protein kinase, putative	8	3518.98	3420.3	543	683	0.19409	0.158758
Ld1S_080864500	Amastin surface glycoprotein, putative	8	874.703	881.25	267	317	0.362409	0.302979
Ld1S_080864600	amastin-like protein	8	862.783	826.717	111	136	0.157629	0.134266
Ld1S_080864700	amastin-like protein	8	776.597	750.371	169	201	0.258822	0.225222
Ld1S_080864800	amastin-like protein	8	732.587	716.561	374	464	0.633372	0.521937
Ld1S_080864900	tuzin-like protein;tuzin, putative	8	1423	1393.86	577	616	0.432889	0.413959
Ld1S_080865000	tuzin-like protein;tuzin, putative	8	1720.98	1598.9	659	817	0.474729	0.412158
Ld1S_080865100	tuzin, putative (fragment)	8	1317.56	1191	704	935	0.709647	0.591102
Ld1S_080865200	amastin-like protein	8	745.423	646.759	201	268	0.359527	0.31078
Ld1S_080865300	amastin-like protein	8	754.592	1025.22	216	187	0.247816	0.210687
Ld1S_080865400	amastin-like protein	8	770.179	713.289	170	196	0.254486	0.238333
Ld1S_080865700	hypothetical protein	8	817.856	872.525	1464	1698	2.07616	1.67789
Ld1S_080865800	hypothetical protein	8	1224.03	1143.01	791	720	0.588219	0.692034
Ld1S_080865900	SET domain containing protein, putative	8	1481.68	1452.75	465	377	0.254441	0.320082
Ld1S_080866000	mitochondrial DNA polymerase beta	8	1025.07	978.318	829	937	0.914083	0.847372
Ld1S_080866100	mitochondrial DNA polymerase beta-PAK, putative	8	1741.15	1810.49	674	626	0.359532	0.372275
Ld1S_080866200	Beta-lactamase superfamily domain containing protein, putative	8	5841.44	5395.48	1023	781	0.1337	0.189603
Ld1S_080866300	hypothetical protein	8	668.405	683.841	550	609	0.911124	0.80428
Ld1S_080866400	hypothetical protein	8	437.351	405.724	226	277	0.633358	0.557029
Ld1S_080866500	protein kinase, putative	8	3220.08	3287.24	755	985	0.305893	0.229676
Ld1S_080866600	hypothetical protein	8	855.448	884.522	356	324	0.378749	0.402477
Ld1S_080866700	hypothetical protein	8	492.364	490.795	442	649	1.31813	0.900579
Ld1S_080866800	Dpy-30 motif containing protein, putative	8	1574.28	1521.47	1125	1474	0.9363	0.739419
Ld1S_080866900	Protein of unknown function (DUF2453), putative	8	2300.45	2193.31	669	603	0.262123	0.305019
Ld1S_080867000	hypothetical protein	8	543.709	536.603	64	97	0.178404	0.119269
Ld1S_080867100	hypothetical protein	8	2920.26	2807.35	351	588	0.201352	0.125029
Ld1S_080867200	DnaJ domain containing protein, putative	8	948.97	1093.93	538	644	0.67863	0.491806
Ld1S_080867300	AAA domain (dynein-related subfamily)/von Willebrand factor type A domain containing protein, putative	8	6209.11	6336.71	2331	2249	0.36221	0.367856
Ld1S_080867400	cathepsin L-like protease (fragment)	8	1085.59	1062.3	175	215	0.19805	0.164737
Ld1S_080867600	cathepsin L-like protease (fragment)	8	1098.42	1196.45	19	19	0.0172976	0.0158803
Ld1S_080867800	cathepsin L-like protease (fragment)	8	1190.11	1196.45	68	63	0.0529363	0.0568348
Ld1S_080867900	cathepsin L-like protease (fragment)	8	976.476	975.047	107	140	0.143373	0.109738
Ld1S_080868000	cathepsin L-like protease (fragment)	8	1081	1084.11	19	12	0.0111008	0.0175259
Ld1S_080868100	histone deacetylase, putative	8	1559.61	1702.51	668	628	0.402664	0.392361
Ld1S_080868200	Ring finger domain containing protein, putative	8	973.726	1138.64	495	696	0.71478	0.434727
Ld1S_080868300	hypothetical protein	8	992.98	953.233	7284	8263	8.32141	7.64136
Ld1S_080868400	stress-induced protein sti1	8	1595.37	1547.64	5680	6424	4.02665	3.6701
Ld1S_080868500	Repeat of unknown function (DUF1126), putative	8	2415.06	2386.36	1298	1281	0.530422	0.543926
Ld1S_080868600	phosphoribosylpyrophosphate synthetase	8	1092	1048.12	1555	1614	1.47802	1.48361
Ld1S_080868700	suppressive immunomodulating factor, putative	8	2333.46	2452.89	870	927	0.397265	0.354684
Ld1S_080868800	Exocyst complex component Sec3, putative	8	2995.44	3195.62	823	772	0.257725	0.25754
Ld1S_080868900	Thiopurine S-methyltransferase (TPMT), putative	8	1192.86	1376.41	738	758	0.635448	0.536178
Ld1S_080869000	MRB1 complex subunit MRB3010	8	1151.6	1195.36	528	451	0.391629	0.441708
Ld1S_080869100	SLU7 splicing factor homolog (S. cerevisiae). RNA processing and modification	8	1324.89	1305.52	392	391	0.295119	0.300265
Ld1S_080869200	intraflagellar transport protein 122B, putative	8	3320.94	3383.22	2237	2131	0.641686	0.661205
Ld1S_080869300	MIX protein	8	581.301	568.232	413	422	0.725957	0.726816
Ld1S_080869400	hypothetical protein	8	1070.92	1100.47	490	540	0.504242	0.445263
Ld1S_080869500	Zinc finger, C3HC4 type (RING finger), putative	8	1604.54	1602.17	5	5	0.00311616	0.00312076
Ld1S_080870500	Zinc finger, C3HC4 type (RING finger), putative	8	1583.45	1591.27	1	0	0	0.00062843
Ld1S_080870800	hypothetical protein	8	1654.97	1772.32	65	54	0.032629	0.0366752
Ld1S_080870900	amidinotransferase, putative	8	1573.36	1693.79	341	390	0.247876	0.201324
Ld1S_080871000	protein kinase, putative	8	4669.67	5078.09	1018	1537	0.329146	0.200469
Ld1S_080871100	beta tubulin (fragment)	8	2330.71	2413.62	1597	2598	1.11468	0.661661
Ld1S_080871200	Protein of unknown function (DUF1498), putative	8	831.61	883.431	78	85	0.102211	0.0882921
Ld1S_090871300	hypothetical protein	9	520.787	536.603	147	246	0.472362	0.273946
Ld1S_090871400	WD repeat domain 74. Function unknown	9	1071.83	1158.28	795	953	0.889132	0.686364
Ld1S_090871500	hypothetical protein	9	419.931	428.628	2857	3420	8.1442	6.66546
Ld1S_090871600	hypothetical protein	9	1876.85	1878.11	1176	1182	0.629778	0.626161
Ld1S_090871700	Peroxisomal biogenesis factor 11 (PEX11), putative	9	912.295	948.871	815	901	0.987619	0.858916
Ld1S_090871800	N-acetyl-D-glucosaminylphosphatidylinositol de-N-acetylase	9	687.659	710.017	811	926	1.3466	1.14223
Ld1S_090871900	endonuclease III, putative	9	770.179	881.25	1079	1230	1.59703	1.2244
Ld1S_090872000	RNA-binding protein 5, putative	9	475.86	458.076	1897	2827	5.94082	4.14124
Ld1S_090872100	RNA helicase, putative	9	3293.43	3394.12	1213	638	0.193719	0.357383
Ld1S_090872200	RNA-binding protein 5-like protein	9	708.748	622.765	235	219	0.308996	0.37735
Ld1S_090872300	RNA-binding protein 5-like protein	9	815.106	864.89	225	460	0.564344	0.260149
Ld1S_090872400	flagellar pocket cytoskeletal protein bilbo1	9	1693.48	1704.7	1961	1868	1.10306	1.15035
Ld1S_090872500	hypothetical protein	9	803.186	811.448	293	245	0.305035	0.361083
Ld1S_090872600	hypothetical protein	9	1971.29	2072.25	1139	1209	0.613304	0.549645
Ld1S_090872700	kinesin, putative	9	3171.49	2957.86	386	384	0.121079	0.1305
Ld1S_090872800	FHA domain/Ring finger domain containing protein, putative	9	1544.02	1522.56	771	709	0.45919	0.506385
Ld1S_090873700	microtubule associated protein-like protein	9	465.775	375.186	2	4	0.00858784	0.00533069
Ld1S_090874000	ATG8/AUT7/APG8/PAZ2, putative	9	485.029	404.633	20	19	0.0391729	0.0494275
Ld1S_090874100	hypothetical protein	9	529.956	479.889	206	307	0.579293	0.429266
Ld1S_090874200	NRDE protein, putative	9	1566.95	1392.77	862	881	0.56224	0.618911
Ld1S_090874300	Domain of unknown function (DUF4586), putative	9	950.804	888.885	675	947	0.995999	0.759379
Ld1S_090874400	catalytic subunit of the vacuolar transporter chaperone 4, putative	9	2098.74	2299.1	2096	2287	1.0897	0.91166
Ld1S_090874500	ATP-dependent protease ATPase subunit HslU2	9	1472.51	1433.12	1579	1633	1.10899	1.10179
Ld1S_090874600	cysteine peptidase, Clan CA, family C19, putative	9	2668.12	2783.35	1399	1311	0.491357	0.502631
Ld1S_090874700	DNA replication licensing factor MCM4	9	2636.94	2398.35	1071	881	0.334099	0.446557
Ld1S_090874800	G10 protein, putative	9	897.625	869.253	601	623	0.694054	0.691398
Ld1S_090874900	integral membrane transport protein, putative	9	1763.16	1796.31	632	473	0.268269	0.351832
Ld1S_090875000	hypothetical protein	9	2151	2089.7	663	534	0.248257	0.317271
Ld1S_090875100	kinesin, putative	9	3445.63	3374.49	834	880	0.255396	0.247148
Ld1S_090875200	hypothetical protein	9	815.106	751.462	516	607	0.744689	0.686661
Ld1S_090875300	cdc2-related kinase 12	9	2441.65	2411.44	942	946	0.387443	0.390638
Ld1S_090875400	CHASE domain-containing protein	9	2590.18	2480.15	682	886	0.342061	0.274983
Ld1S_090875500	CHASE domain-containing protein	9	2430.65	2477.97	654	571	0.234917	0.263926
Ld1S_090875600	hypothetical protein	9	3205.41	3010.21	1270	1421	0.443313	0.421897
Ld1S_090875700	hypothetical protein	9	876.537	804.904	217	220	0.250988	0.269597
Ld1S_090875800	Ring finger domain containing protein, putative	9	2492.08	2325.28	776	748	0.300151	0.333723
Ld1S_090875900	DNA photolyase, putative	9	2716.71	2433.25	892	851	0.313246	0.366587
Ld1S_090876000	Ankyrin repeats (3 copies), putative	9	659.236	573.685	383	387	0.587043	0.667614
Ld1S_090876100	hypothetical protein	9	352.082	344.647	198	235	0.667459	0.5745
Ld1S_090876200	hypothetical protein	9	580.385	666.391	226	271	0.466932	0.33914
Ld1S_090876300	Haemolysin-III related. Signal transduction mechanisms	9	1411.08	1423.31	669	754	0.534344	0.470032
Ld1S_090876400	hypothetical protein	9	5426.09	5292.95	924	754	0.138958	0.174572
Ld1S_090876500	kinetoplastid kinetochore protein 10, putative (fragment);kinetoplastid kinetochore protein 19, putative (fragment)	9	1344.15	1091.75	392	468	0.348177	0.359058
Ld1S_090876600	kinetoplastid kinetochore protein 10, putative (fragment);kinetoplastid kinetochore protein 19, putative (fragment)	9	1281.8	1222.63	305	357	0.278515	0.249463
Ld1S_090876700	tyrosine phosphatase, putative	9	3057.79	2952.41	614	442	0.144549	0.207966
Ld1S_090876800	Zinc finger, C3HC4 type (RING finger), putative	9	1336.81	1361.14	825	911	0.681473	0.60611
Ld1S_090876900	Bardet-Biedl syndrome 8 protein	9	1787	1685.06	455	422	0.23615	0.270019
Ld1S_090877000	hypothetical protein	9	2762.56	2691.74	785	726	0.2628	0.291633
Ld1S_090877100	hypothetical protein	9	8076.79	7625.87	1918	1855	0.22967	0.251512
Ld1S_090877200	serine/threonine protein phosphatase, putative	9	1905.28	1971.91	1093	1292	0.678117	0.554286
Ld1S_090877300	hypothetical protein	9	2157.42	2126.78	1024	1106	0.51265	0.481479
Ld1S_090877400	hypothetical protein	9	1142.43	1285.88	698	874	0.765035	0.542817
Ld1S_090877500	hypothetical protein	9	4408.36	4115.05	1210	1141	0.258827	0.294043
Ld1S_090877600	hypothetical protein	9	1256.12	1110.29	686	816	0.649617	0.617858
Ld1S_090877700	Flagellum attachment zone protein 3	9	2421.48	2100.6	1418	1500	0.619456	0.675044
Ld1S_090877800	leucine-rich repeat protein, putative	9	2827.66	2801.9	1565	2232	0.789346	0.55855
Ld1S_090877900	hypothetical protein	9	3076.13	2855.34	1223	1208	0.392701	0.428321
Ld1S_090878000	Dual specificity phosphatase, catalytic domain containing protein, putative	9	1798	1778.86	1044	1091	0.606785	0.586893
Ld1S_090878100	Histidine phosphatase superfamily (branch 1), putative	9	940.718	879.069	694	955	1.01518	0.789472
Ld1S_090878200	hypothetical protein	9	1470.67	1338.24	527	510	0.34678	0.393802
Ld1S_090878300	surface antigen-like protein	9	844.446	836.533	334	329	0.389605	0.399267
Ld1S_090878400	ATP-dependent DNA helicase, putative	9	3176.07	2804.08	1161	1353	0.425998	0.41404
Ld1S_090878500	cyclin 1	9	1025.07	995.769	2194	4185	4.08264	2.20332
Ld1S_090878600	Glucosidase II beta subunit-like, putative	9	2320.62	2231.48	2353	3007	1.29577	1.05446
Ld1S_090878700	hypothetical protein	9	1795.25	1795.22	426	434	0.241749	0.237297
Ld1S_090878800	PH domain containing protein, putative	9	3254.92	2952.41	853	962	0.295552	0.288917
Ld1S_090878900	palmitoyl acyltransferase 5, putative	9	1449.59	1355.69	1585	1989	1.37212	1.16915
Ld1S_090879000	Zeta toxin, putative	9	1963.04	1881.38	573	644	0.328063	0.304563
Ld1S_090879100	Methyltransferase TYW3, putative	9	1100.26	1060.12	660	839	0.76255	0.622572
Ld1S_090879200	prefoldin subunit 2, putative	9	533.624	418.812	675	802	1.50293	1.6117
Ld1S_090879300	hypothetical protein	9	1137.85	1127.74	458	567	0.498309	0.406123
Ld1S_090879400	hypothetical protein	9	1033.32	954.324	24	25	0.0241938	0.0251487
Ld1S_090879500	5S(MS) ribosomal RNA	9	158.62	130.879	1	3	0.0189131	0.00764066
Ld1S_090879800	hypothetical protein	9	1435.83	1485.47	486	478	0.332908	0.327168
Ld1S_090879900	hypothetical protein	9	1700.81	1585.81	658	650	0.382171	0.414929
Ld1S_090880000	cleavage and polyadenylation specificity factor 30 kDa subunit, putative	9	991.147	1012.13	552	538	0.542806	0.545385
Ld1S_090880100	hypothetical protein	9	1897.02	1885.74	540	475	0.250392	0.286359
Ld1S_090880200	ubiquitin ligase, putative	9	6544.68	6069.5	1859	1642	0.250891	0.306285
Ld1S_090880300	acyl-CoA binding protein, putative	9	2766.22	2653.57	903	780	0.281973	0.340297
Ld1S_090880400	hypothetical protein	9	15819.8	15285.5	3560	3252	0.205565	0.2329
Ld1S_090880500	oligopeptidase b	9	2115.24	2113.69	3560	3508	1.65844	1.68426
Ld1S_090880600	Domain of unknown function (DUF4464), putative	9	720.667	720.924	527	555	0.77012	0.731007
Ld1S_090880700	Mitogen-activated protein kinase kinase 5. Signal transduction mechanisms	9	3589.58	3468.29	1462	1406	0.391689	0.421534
Ld1S_090880800	kinetoplast-associated protein-like protein	9	3838.06	3721.32	1754	1683	0.438503	0.471338
Ld1S_090880900	prefoldin subunit, putative	9	725.252	718.742	310	336	0.463288	0.431309
Ld1S_090881000	ATPase family associated with various cellular activities (AAA), putative	9	1739.32	1649.07	895	1056	0.607134	0.542729
Ld1S_090881100	DEAD/DEAH box helicase-like protein	9	2334.37	2328.55	1387	1155	0.494779	0.595649
Ld1S_090881200	Uncharacterised protein family (UPF0160), putative	9	1260.71	1229.17	1936	1944	1.54199	1.57505
Ld1S_090881300	ras family protein-like protein	9	879.287	872.525	493	491	0.558407	0.565027
Ld1S_090881400	hypothetical protein	9	486.863	437.353	361	571	1.17281	0.82542
Ld1S_090881500	Translation initiation factor IF-2. Translation, ribosomal structure and biogenesis	9	1668.72	1537.83	625	482	0.288844	0.406418
Ld1S_090881600	histone h1-like protein	9	1472.51	1451.66	3217	3680	2.49914	2.21608
Ld1S_090881700	phospholipid transporting ATPase-like protein, putative	9	7392.8	7094.72	3011	3342	0.452062	0.4244
Ld1S_090881800	ubiquitin-fusion protein	9	468.525	468.982	402	541	1.15469	0.857176
Ld1S_090881900	ef-hand protein 5, putative	9	688.576	676.207	866	847	1.23007	1.28067
Ld1S_090882000	calmodulin, putative	9	494.198	528.968	349	623	1.26063	0.659775
Ld1S_090882100	calmodulin, putative	9	477.694	451.532	1696	1894	3.96488	3.7561
Ld1S_090882200	calmodulin, putative	9	527.206	490.795	599	843	1.599	1.22047
Ld1S_090882300	translation-associated element 2, putative	9	3529.99	3169.45	1867	1432	0.405667	0.589062
Ld1S_090882400	O-phosphoseryl-tRNA(Sec) selenium transferase, putative	9	1809	1700.33	595	521	0.288004	0.349931
Ld1S_090882500	hypothetical protein	9	1913.53	1776.68	1122	885	0.462497	0.631515
Ld1S_090882600	elongation factor-1 gamma	9	1115.84	1104.83	629	651	0.583416	0.569316
Ld1S_090882800	elongation factor-1 gamma	9	979.227	970.684	43	30	0.0306364	0.0442987
Ld1S_090882900	hypothetical protein	9	2822.15	2625.21	3961	3784	1.34082	1.50883
Ld1S_090883000	N-terminal region of Chorein, a TM vesicle-mediated sorter, putative	9	14625.1	13794.6	3795	4522	0.309194	0.275107
Ld1S_090883100	PUB domain containing protein, putative	9	858.199	855.074	531	825	0.961315	0.620999
Ld1S_090883400	tRNA-His	9	107.275	109.066	1	0	0	0.00916879
Ld1S_090883600	UEV domain/Zinc finger, C3HC4 type (RING finger) containing protein, putative	9	866.451	729.649	444	491	0.56668	0.608512
Ld1S_090883700	Present in the outer mitochondrial membrane proteome 10	9	1601.79	1609.81	2562	2430	1.51705	1.59149
Ld1S_090883800	hypothetical protein	9	343.83	313.018	261	347	1.00922	0.833817
Ld1S_090884400	LEM3 (ligand-effect modulator 3) family / CDC50 family, putative	9	1650.38	1635.98	875	1048	0.635004	0.534846
Ld1S_090884500	lectin, mannose-binding 1. Intracellular trafficking, secretion, and vesicular transport	9	1050.74	1038.3	487	537	0.511067	0.469034
Ld1S_090884800	MSP (Major sperm protein) domain containing protein, putative	9	729.836	703.473	812	877	1.20164	1.15427
Ld1S_090884900	DNA-directed RNA polymerase III subunit, putative	9	812.355	774.366	473	502	0.617956	0.610822
Ld1S_090885000	eukaryotic translation initiation factor 2 subunit, putative (fragment)	9	1334.98	1331.69	4171	3607	2.70192	3.13211
Ld1S_090885100	translation initiation factor EIF-2B gamma subunit, putative	9	1622.88	1549.82	331	284	0.174998	0.213573
Ld1S_090885200	hypothetical protein	9	739.922	783.091	916	978	1.32176	1.16972
Ld1S_090885300	whole genome shotgun sequence. Signal transduction mechanisms	9	1370.73	1245.53	434	405	0.295462	0.348446
Ld1S_090885400	mitochondrial RNA binding protein 2	9	697.745	726.377	1661	1638	2.34756	2.28669
Ld1S_090885500	mitochondrial import inner membrane translocase subunit TIM17, putative	9	535.458	530.059	571	543	1.01409	1.07724
Ld1S_090885600	heat shock protein family B (small), member 11. Function unknown	9	667.488	657.666	689	845	1.26594	1.04764
Ld1S_090885700	hypothetical protein	9	882.038	816.901	418	425	0.481839	0.51169
Ld1S_090885800	hypothetical protein	9	2135.41	1966.45	997	838	0.39243	0.507004
Ld1S_090885900	Skp1 domain-containing protein	9	715.166	711.108	755	763	1.06689	1.06172
Ld1S_090886000	hypothetical protein	9	2775.39	2750.63	784	759	0.273475	0.285025
Ld1S_090886100	hypothetical protein	9	1842.93	1778.86	395	322	0.174722	0.222052
Ld1S_090886200	Ankyrin Repeat Protein. Cell wall/membrane/envelope biogenesis	9	4300.16	4091.05	830	725	0.168598	0.202882
Ld1S_090886300	Zinc finger, C3HC4 type (RING finger), putative	9	1200.2	1352.41	859	1040	0.866526	0.635161
Ld1S_090886400	AAA family ATPase, putative	9	3607	3688.6	1729	1332	0.369282	0.468742
Ld1S_090886500	hypothetical protein	9	1327.64	1170.27	533	427	0.321623	0.455449
Ld1S_090886600	ATP-dependent helicase, putative (fragment)	9	6210.02	6152.39	1692	1283	0.206601	0.275015
Ld1S_090886700	NA. Defense mechanisms	9	596.888	627.127	835	806	1.35034	1.33147
Ld1S_090886800	Bromodomain, putative	9	2055.64	1973	684	574	0.279231	0.346681
Ld1S_090886900	mitochondrial carrier protein, putative	9	1100.26	978.318	793	1124	1.02158	0.810574
Ld1S_090887000	hypothetical protein	9	1114.93	977.228	513	618	0.554297	0.524954
Ld1S_090887100	hypothetical protein	9	1742.07	1610.9	487	434	0.249129	0.302316
Ld1S_090887200	PPPDE putative peptidase domain containing protein, putative	9	779.347	654.394	361	314	0.402901	0.551656
Ld1S_090887300	PPPDE putative peptidase domain containing protein, putative	9	781.181	716.561	188	264	0.33795	0.262364
Ld1S_090887400	hypothetical protein	9	1111.26	1059.03	1034	1265	1.13835	0.976368
Ld1S_090887500	paraflagellar rod component, putative	9	1643.96	1688.34	1240	1540	0.93676	0.734451
Ld1S_090887600	hypothetical protein	9	1708.15	1645.8	745	837	0.490005	0.452667
Ld1S_090887700	histone H2B	9	463.024	411.177	13929	13117	28.329	33.8759
Ld1S_090887800	hypothetical protein	9	572.133	621.674	263	238	0.415987	0.423051
Ld1S_090887900	Exonuclease. Replication, recombination and repair	9	582.218	567.141	235	236	0.405346	0.414359
Ld1S_090888000	hypothetical protein	9	928.799	882.341	437	448	0.482343	0.495274
Ld1S_090888100	hypothetical protein	9	1735.65	1514.92	668	594	0.342234	0.440947
Ld1S_090888200	hypothetical protein	9	1943.78	1785.4	1090	1074	0.55253	0.610506
Ld1S_090888300	Glycosyl hydrolase family 47, putative	9	1772.33	1778.86	967	1127	0.635887	0.543607
Ld1S_090888400	SET domain containing protein, putative	9	1707.23	1588	459	373	0.218483	0.289044
Ld1S_090888500	Bacterial trigger factor protein (TF) C-terminus, putative	9	503.367	502.792	1302	1292	2.56672	2.58954
Ld1S_090888600	ubiquinone biosynthesis protein-like protein, putative	9	639.982	594.408	485	495	0.77346	0.815938
Ld1S_090888700	DnaJ domain containing protein, putative	9	1160.77	1172.46	627	507	0.436779	0.534775
Ld1S_090888800	Rhodanese-like domain containing protein, putative	9	489.614	497.339	598	675	1.37864	1.2024
Ld1S_090888900	Rhodanese-like domain containing protein, putative	9	540.959	567.141	1010	1285	2.37541	1.78086
Ld1S_090889000	Rhodanese-like domain containing protein, putative	9	394.258	460.257	703	875	2.21936	1.52741
Ld1S_090889100	J-binding protein	9	2360.96	2198.76	2020	2569	1.08811	0.918699
Ld1S_090889200	cytochrome b5-like, putative	9	389.674	459.166	650	1016	2.60731	1.41561
Ld1S_090889300	cytochrome b5-like protein	9	532.707	507.155	383	408	0.7659	0.755193
Ld1S_090889400	hypothetical protein	9	440.102	417.721	548	654	1.48602	1.31188
Ld1S_090889500	hypothetical protein	9	3927.91	3983.08	2598	2291	0.583262	0.65226
Ld1S_090889600	Leucine Rich repeat, putative	9	1014.99	1004.49	689	769	0.757646	0.685917
Ld1S_090889700	Radial spoke protein 11	9	551.044	567.141	536	858	1.55704	0.945091
Ld1S_090889800	hypothetical protein	9	1844.76	1908.65	634	790	0.42824	0.332172
Ld1S_090889900	hypothetical protein	9	593.221	535.512	493	674	1.13617	0.920614
Ld1S_100013600	fatty acid desaturase, putative	10	1060.83	1092.84	7	6	0.00565595	0.00640534
Ld1S_100013700	pteridine transporter, putative (fragment)	10	1718.23	1693.79	81	99	0.0576174	0.0478218
Ld1S_100013800	phosphate-Repressible Phosphate Permease-like protein;phosphate-repressible phosphate permease	10	1371.65	1328.42	1019	1038	0.756752	0.767077
Ld1S_100013900	FAD binding domain containing protein, putative	10	1253.37	1317.51	521	1046	0.834547	0.395442
Ld1S_100014000	Gryzun, putative trafficking through Golgi, putative	10	2238.1	2395.08	1329	1413	0.631338	0.554887
Ld1S_100014100	Dos2-interacting transcription regulator of RNA-Pol-II, putative	10	2349.96	2523.78	1014	1024	0.435752	0.401779
Ld1S_100014200	thymidylate kinase-like protein	10	868.285	939.055	925	1153	1.32791	0.985033
Ld1S_100014300	ribosomal protein l35a, putative	10	565.715	556.235	3577	5186	9.16717	6.43074
Ld1S_100014400	hypothetical protein	10	905.877	937.964	905	1066	1.17676	0.964856
Ld1S_100014500	dehydrogenase-like protein	10	1164.44	1035.03	3100	3325	2.85546	2.99507
Ld1S_100014600	SRP40, C-terminal domain containing protein, putative	10	750.924	846.349	462	405	0.539335	0.545874
Ld1S_100014700	WD-repeat containing protein	10	1174.52	1160.46	1060	1246	1.06086	0.913432
Ld1S_100014800	PSP1 C-terminal conserved region, putative	10	1014.07	1064.48	238	323	0.318519	0.223583
Ld1S_100014900	hypothetical protein	10	1919.95	1956.64	1170	1025	0.533869	0.597965
Ld1S_100015000	DEAD/DEAH box helicase, putative	10	2092.32	2106.06	993	838	0.400513	0.471497
Ld1S_100015100	conserved protein, unknown function	10	1065.41	1019.76	1841	1776	1.66696	1.80532
Ld1S_100015200	hypothetical protein	10	1452.34	1486.56	579	411	0.282992	0.389489
Ld1S_100015300	nucleoside phosphatase, putative	10	1790.67	1830.12	1578	1830	1.02197	0.862238
Ld1S_100015400	leucine-rich repeat protein, putative	10	705.08	656.575	423	556	0.788563	0.644252
Ld1S_100015500	hypothetical protein	10	520.787	511.518	176	222	0.426278	0.344074
Ld1S_100015600	hypothetical protein	10	1889.69	1842.12	381	412	0.218025	0.206827
Ld1S_100015700	MORN repeat, putative	10	691.327	658.756	622	722	1.04437	0.944204
Ld1S_100015800	Mitogen-activated protein kinase 10, putative	10	1112.17	1089.57	743	975	0.876661	0.681923
Ld1S_100015900	hypothetical protein	10	540.042	463.529	258	342	0.633284	0.5566
Ld1S_100016000	nucleolar protein 56, putative	10	1262.54	1153.91	3566	2988	2.36665	3.09035
Ld1S_100016100	small EDRK-rich factor. Function unknown	10	1988.71	1943.55	729	621	0.312263	0.375087
Ld1S_100016200	hypothetical protein	10	688.576	753.643	582	577	0.837961	0.772249
Ld1S_100016300	Amastin surface glycoprotein, putative	10	1277.21	1261.89	679	847	0.663163	0.538082
Ld1S_100016400	Amastin surface glycoprotein, putative	10	1049.83	1003.4	450	657	0.625818	0.448474
Ld1S_100016500	hypothetical protein	10	1944.7	1945.73	1009	986	0.507019	0.518571
Ld1S_100016600	pterin 4 alpha carbinolamine dehydratase, putative	10	915.046	785.272	467	583	0.637127	0.594698
Ld1S_100016700	COPI associated protein, putative	10	387.84	349.01	1814	2380	6.13655	5.19756
Ld1S_100016800	exonuclease, putative	10	2580.1	2387.45	1110	899	0.348436	0.464932
Ld1S_100016900	hypothetical protein	10	5962.47	5838.28	1554	1345	0.225578	0.266174
Ld1S_100017000	isocitrate dehydrogenase [NADP], mitochondrial precursor, putative	10	1240.54	1161.55	4838	5544	4.46903	4.16513
Ld1S_100017100	kinetoplastid kinetochore protein 4, putative	10	1963.96	1950.09	915	745	0.379336	0.469208
Ld1S_100017200	protein transport protein SEC23, putative	10	2267.44	2196.58	1053	846	0.373108	0.479381
Ld1S_100017300	hypothetical protein	10	5245.47	5141.35	1549	1516	0.289011	0.301283
Ld1S_100017400	zinc finger. Function unknown	10	1216.7	1066.66	602	695	0.571218	0.564378
Ld1S_100017500	folate/biopterin transporter, putative;biopterin transporter, putative;pteridine transporter, putative;folate/biopterin transporter, putative (fragment)	10	1897.94	1929.37	533	779	0.410445	0.276256
Ld1S_100017600	pteridine transporter (truncated), putative	10	1970.37	2026.44	463	515	0.261372	0.22848
Ld1S_100017700	pteridine transporter (truncated), putative	10	1489.01	1524.74	390	604	0.405638	0.255782
Ld1S_100017800	pteridine transporter (truncated), putative	10	1969.46	1931.55	261	286	0.145218	0.135125
Ld1S_100017900	pteridine transporter (truncated), putative	10	1878.69	1753.77	548	715	0.380585	0.312469
Ld1S_100018000	pteridine transporter (truncated), putative	10	1864.02	1782.13	285	304	0.163089	0.159921
Ld1S_100018100	folate/biopterin transporter, putative;biopterin transporter, putative;pteridine transporter, putative;folate/biopterin transporter, putative (fragment)	10	1718.23	1697.06	2805	3103	1.80593	1.65286
Ld1S_100018200	dihydroxyacetone kinase 1-like protein	10	1617.38	1544.37	554	583	0.360461	0.358723
Ld1S_100018300	Eukaryotic translation initiation factor 4 gamma. Translation, ribosomal structure and biogenesis	10	1707.23	1615.26	680	488	0.285843	0.420984
Ld1S_100018400	Zinc finger, C3HC4 type (RING finger), putative	10	420.848	495.158	253	397	0.943334	0.510948
Ld1S_100018500	Zinc finger, C3HC4 type (RING finger), putative	10	555.629	544.237	270	309	0.556127	0.496107
Ld1S_100018600	hypothetical protein	10	673.906	646.759	290	322	0.477811	0.44839
Ld1S_100018700	4F5 protein family/Zinc-binding, putative	10	348.414	364.279	474	657	1.88569	1.3012
Ld1S_100018800	GP63, leishmanolysin (fragment)	10	2160.17	2123.51	142	481	0.222668	0.0668705
Ld1S_100018900	GP63, leishmanolysin (fragment)	10	3187.99	3122.55	75	157	0.0492473	0.0240188
Ld1S_100019000	PIF1-like helicase, putative	10	1835.59	1810.49	38	18	0.0098061	0.0209888
Ld1S_100019100	GP63, leishmanolysin (fragment)	10	2446.23	2448.52	198	98	0.0400616	0.0808651
Ld1S_100019200	GP63, leishmanolysin (fragment)	10	2404.97	2445.25	3	0	0	0.00122687
Ld1S_100019400	GP63, leishmanolysin (fragment)	10	3057.79	2880.42	4	2	0.000654067	0.00138869
Ld1S_100019900	GP63, leishmanolysin (fragment)	10	3091.72	3059.29	850	839	0.27137	0.277842
Ld1S_100020000	GP63, leishmanolysin (fragment)	10	2587.43	2624.12	113	214	0.0827074	0.0430621
Ld1S_100020200	GP63, leishmanolysin (fragment)	10	1923.61	2005.72	127	190	0.0987725	0.063319
Ld1S_100020400	hypothetical protein	10	340.162	332.65	236	217	0.637931	0.709454
Ld1S_100020500	hypothetical protein	10	244.807	223.584	195	234	0.955856	0.872153
Ld1S_100020600	mitogen-activated protein kinase 3, putative	10	1015.9	1063.39	1019	1257	1.23732	0.958256
Ld1S_100020700	hypothetical protein	10	17384.9	17011	6098	7905	0.454704	0.358475
Ld1S_100020800	glycerol-3-phosphate dehydrogenase [NAD+], glycosomal	10	1040.66	1080.84	1032	1041	1.00033	0.954813
Ld1S_100020900	hypothetical protein	10	406.178	418.812	10	29	0.0713974	0.0238771
Ld1S_100021000	hypothetical protein	10	2338.04	2279.47	607	481	0.205728	0.26629
Ld1S_100021100	hypothetical protein	10	3021.12	2988.4	1296	949	0.314122	0.433677
Ld1S_100021200	hypothetical protein	10	2834.99	2822.62	1854	1451	0.511818	0.656837
Ld1S_100021300	hypothetical protein	10	1255.21	1276.07	685	620	0.493942	0.536805
Ld1S_100021400	zinc binding dehydrogenase-like protein	10	1116.76	1179	695	693	0.620546	0.589483
Ld1S_100021500	zinc-binding dehydrogenase-like protein	10	1293.72	1098.29	474	365	0.282133	0.43158
Ld1S_100021600	chromatin assembly factor 1 subunit A, putative	10	2048.31	1898.83	864	643	0.313918	0.455017
Ld1S_100021700	hypothetical protein	10	824.275	718.742	497	620	0.752177	0.691486
Ld1S_100021800	ABC1 family, putative	10	1610.04	1669.79	1126	984	0.611165	0.674334
Ld1S_100021900	endonuclease G, putative	10	1551.36	1523.65	579	577	0.371932	0.380009
Ld1S_100022000	FLA1-binding protein	10	1919.03	1919.55	1340	1190	0.620105	0.698079
Ld1S_100022100	Flagellum adhesion protein 1	10	1548.61	1351.32	868	925	0.59731	0.642334
Ld1S_100022200	C3H1-type domain-containing protein	10	767.428	731.83	586	729	0.949926	0.800732
Ld1S_100022300	hypothetical protein	10	1137.85	1016.49	361	401	0.35242	0.355143
Ld1S_100022400	hypothetical protein	10	5371.08	5150.08	1641	1512	0.281508	0.318636
Ld1S_100022500	hypothetical protein	10	945.303	916.151	1952	2044	2.16227	2.13065
Ld1S_100022600	hypothetical protein	10	1398.24	1321.88	508	530	0.379048	0.384303
Ld1S_100022700	HEAT repeat, putative	10	4351.51	4180.48	1131	963	0.221303	0.270543
Ld1S_100022800	RNA recognition motif. (a.k.a. RRM, RBD, or RNP domain), putative	10	2747.89	2636.12	711	537	0.195423	0.269715
Ld1S_100023000	amino acid permease 24	10	1311.14	1146.28	3	6	0.00457618	0.00261716
Ld1S_100023100	amino acid permease 24	10	1467.92	1366.59	155	127	0.0865168	0.113421
Ld1S_100023200	deaminase, putative	10	852.698	823.445	304	329	0.385834	0.369181
Ld1S_100023300	hypothetical protein	10	548.294	499.52	849	1217	2.21961	1.69963
Ld1S_100023400	hypothetical protein	10	5647.06	5381.3	1099	1283	0.227198	0.204226
Ld1S_100023500	hypothetical protein	10	2012.55	1935.91	578	619	0.30757	0.298567
Ld1S_100023600	hypothetical protein	10	1534.86	1628.35	595	745	0.485388	0.365401
Ld1S_100023700	WD domain, G-beta repeat, putative	10	1181.86	1145.19	697	703	0.594826	0.608633
Ld1S_100023800	hypothetical protein	10	646.4	655.484	1595	1675	2.59128	2.43332
Ld1S_100023900	hypothetical protein	10	2985.36	2838.98	1454	1270	0.425409	0.512156
Ld1S_100024000	hypothetical protein	10	5114.35	4813.07	1143	1276	0.249494	0.237479
Ld1S_100024100	hypothetical protein	10	1091.09	1093.93	567	579	0.530664	0.518316
Ld1S_100024200	serine/threonine-protein kinase, putative	10	4832.87	4493.5	1507	1441	0.298166	0.335373
Ld1S_100024300	adenosine deaminase. Nucleotide transport and metabolism	10	2064.81	1969.72	662	601	0.291068	0.336088
Ld1S_100024400	nuclear transport factor 2, putative	10	375.921	332.65	1316	1556	4.13917	3.95611
Ld1S_100024500	Ribosome biogenesis protein Nop16, putative	10	597.805	562.779	289	242	0.404814	0.513523
Ld1S_100024600	histone H3	10	485.946	441.716	1202	1488	3.06207	2.72121
Ld1S_100024700	S-phase cyclin A-associated protein in the ER. Function unknown	10	3114.64	2890.24	1050	1128	0.362161	0.363292
Ld1S_100024800	FKBP-type peptidyl-prolyl cis-trans isomerase, putative	10	533.624	513.699	2081	2437	4.56689	4.05101
Ld1S_100024900	hypothetical protein	10	4775.11	4422.61	1188	1035	0.216749	0.26862
Ld1S_100025000	small GTP-binding protein Rab11, putative	10	719.75	664.21	1068	1331	1.84925	1.60793
Ld1S_100025100	hypothetical protein	10	671.156	657.666	608	830	1.23667	0.924482
Ld1S_100025200	hypothetical protein	10	1013.15	1027.4	224	277	0.273404	0.218027
Ld1S_100025300	multi-pass transmembrane protein. Function unknown	10	713.332	641.306	151	146	0.204673	0.235457
Ld1S_100025400	hypothetical protein	10	138.449	153.783	34	36	0.260024	0.221091
Ld1S_100025500	hypothetical protein	10	953.554	850.712	172	176	0.184573	0.202184
Ld1S_100025600	hypothetical protein	10	3401.62	3304.69	1434	1386	0.407453	0.433929
Ld1S_100025700	Archaic translocase of outer membrane 12 kDa subunit, putative	10	319.991	355.554	673	683	2.13444	1.89282
Ld1S_100025800	translation initiation factor eif-2b beta subunit, putative	10	1483.51	1367.68	1043	948	0.639025	0.762604
Ld1S_100025900	hypothetical protein	10	2259.19	2343.82	1298	1103	0.488228	0.553797
Ld1S_100026000	histone H3	10	569.382	498.43	5437	7610	13.3654	10.9083
Ld1S_100026100	hypothetical protein	10	1733.82	1703.6	535	619	0.357015	0.31404
Ld1S_100026200	histone H3	10	463.941	410.087	2825	3710	7.99671	6.88879
Ld1S_100026300	ARP2/3 complex subunit, putative	10	1228.62	1157.19	354	387	0.314988	0.305914
Ld1S_100026400	nucleoside phosphorylase-like protein	10	939.801	929.239	516	650	0.691636	0.555293
Ld1S_100026500	carrier protein, putative	10	1089.25	1216.08	456	567	0.52054	0.374975
Ld1S_100026600	RNA-binding protein-like protein	10	1049.83	1088.47	684	538	0.512465	0.628402
Ld1S_100026700	Domain of Unknown Function (DUF1042), putative	10	3275.09	3268.7	1162	955	0.291595	0.355493
Ld1S_100026800	DnaJ domain containing protein, putative	10	736.254	798.36	538	532	0.722577	0.673881
Ld1S_100026900	hypothetical protein	10	968.225	983.772	478	360	0.371815	0.485885
Ld1S_100027000	hypothetical protein	10	1570.61	1644.71	650	653	0.415761	0.395207
Ld1S_100027100	Eukaryotic translation initiation factor 4 gamma 5	10	1947.45	2032.98	1164	1108	0.568949	0.572558
Ld1S_100027200	hypothetical protein	10	1422.08	1305.52	366	403	0.283388	0.280349
Ld1S_100027300	hypothetical protein	10	465.775	503.883	726	1017	2.18346	1.44081
Ld1S_100027400	hypothetical protein	10	1083.75	1187.72	664	757	0.6985	0.559052
Ld1S_100027500	hypothetical protein	10	394.258	347.919	339	337	0.85477	0.974364
Ld1S_100027600	PAB1-binding protein , putative	10	1259.79	1250.98	1813	1718	1.36372	1.44926
Ld1S_100027700	hypothetical protein	10	398.843	467.891	444	466	1.16838	0.948938
Ld1S_100027800	hypothetical protein	10	4164.47	3957.99	1447	1303	0.312885	0.36559
Ld1S_100027900	Zinc finger, C3HC4 type (RING finger), putative	10	1007.65	1016.49	769	986	0.978514	0.756524
Ld1S_100028000	Tumour suppressor, Mitostatin, putative	10	1356.06	1358.96	1348	1524	1.12384	0.991937
Ld1S_100028100	Ras-related protein RabX1, putative	10	596.888	571.504	731	866	1.45086	1.27908
Ld1S_100028200	small GTP-binding protein Rab7, putative	10	586.803	670.753	871	976	1.66325	1.29854
Ld1S_100028300	hypothetical protein	10	381.422	395.908	304	303	0.794396	0.767855
Ld1S_100028400	flagellar protofilament ribbon protein-like protein	10	1067.25	1036.12	1499	1916	1.79527	1.44674
Ld1S_100028500	Zn-finger in Ran binding protein and others, putative	10	485.029	592.226	344	382	0.787582	0.580859
Ld1S_100028600	ran binding protein. Intracellular trafficking, secretion, and vesicular transport;Nuclear structure	10	2745.14	2674.29	1189	1248	0.454622	0.444604
Ld1S_100028700	hypothetical protein	10	1610.04	1478.93	1039	1191	0.739733	0.702535
Ld1S_100028800	Spinocerebellar ataxia type 10 protein domain containing protein, putative	10	855.448	763.459	1255	1397	1.63306	1.64383
Ld1S_100028900	hypothetical protein	10	815.106	846.349	1142	1433	1.75805	1.34932
Ld1S_100029000	kinetoplastid kinetochore protein 20	10	690.41	703.473	351	543	0.786489	0.498953
Ld1S_100029100	tRNA-Lys	10	105.441	115.61	1	1	0.00948397	0.0086498
Ld1S_100029400	Methyltransferase domain containing protein, putative	10	839.861	844.168	172	220	0.261948	0.203751
Ld1S_100029500	Protein of unknown function (DUF1861), putative	10	944.386	948.871	1275	1718	1.81917	1.3437
Ld1S_100029600	Protein of unknown function (DUF1861), putative	10	852.698	953.233	1961	1907	2.23643	2.05721
Ld1S_100029700	Protein of unknown function (DUF1861), putative	10	853.615	808.176	1215	1451	1.69983	1.50339
Ld1S_100029800	Protein of unknown function (DUF1861), putative	10	748.174	771.094	515	499	0.666958	0.667882
Ld1S_100029900	Protein of unknown function (DUF1861), putative	10	819.69	795.088	612	590	0.719784	0.769726
Ld1S_100030000	Protein of unknown function (DUF1861), putative	10	750.007	777.638	858	958	1.27732	1.10334
Ld1S_100030100	Protein of unknown function (DUF1861), putative	10	756.425	814.72	589	608	0.80378	0.722948
Ld1S_100030200	phosphate-Repressible Phosphate Permease-like protein;phosphate-repressible phosphate permease	10	1186.44	1318.6	514	562	0.473685	0.389806
Ld1S_100030300	pteridine transporter, putative (fragment)	10	1646.72	1747.23	51	63	0.038258	0.029189
Ld1S_100030400	fatty acid desaturase, putative	10	1058.08	1020.85	5	3	0.00283533	0.00489786
Ld1S_110030500	hypothetical protein	11	556.546	606.405	109	246	0.442012	0.179748
Ld1S_110030600	Endoplasmic Reticulum-Golgi Intermediate Compartment (ERGIC)/Endoplasmic reticulum vesicle transporter, putative	11	946.219	1033.94	596	812	0.858152	0.576435
Ld1S_110030700	Bacterial transferase hexapeptide (six repeats), putative	11	806.854	897.61	835	1162	1.44016	0.930248
Ld1S_110030800	ATP-binding cassette protein subfamily H, member 1, putative	11	881.121	952.143	976	1191	1.35169	1.02506
Ld1S_110030900	SNF2/RAD54 related DNA helicase, putative	11	2446.23	2470.34	1833	2095	0.856418	0.742004
Ld1S_110031000	protein kinase, putative	11	2886.34	2924.05	1721	1416	0.490587	0.588567
Ld1S_110031100	GRIP domain containing protein, putative	11	3250.34	3192.35	487	546	0.167983	0.152552
Ld1S_110031200	RNA recognition motif. (a.k.a. RRM, RBD, or RNP domain), putative	11	622.561	646.759	410	392	0.629657	0.63393
Ld1S_110031300	MORN repeat, putative	11	1396.41	1422.22	817	833	0.596531	0.574456
Ld1S_110031400	seryl-tRNA synthetase	11	1261.63	1337.14	2494	3291	2.60854	1.86517
Ld1S_110031500	cdc2-related kinase 8, putative	11	1125.93	1268.43	443	394	0.349934	0.34925
Ld1S_110031600	hypothetical protein	11	584.969	622.765	384	285	0.487205	0.616605
Ld1S_110031700	NGG1 interacting factor 3-like protein	11	803.186	735.102	364	426	0.530388	0.495169
Ld1S_110031800	cell cycle sequence binding phosphoprotein (RBP45), putative	11	804.103	848.53	592	602	0.74866	0.697677
Ld1S_110031900	listerin E3 ubiquitin protein ligase 1. Posttranslational modification, protein turnover, chaperones	11	2489.33	2404.9	979	819	0.329005	0.407086
Ld1S_110032000	Exocyst complex component. Intracellular trafficking, secretion, and vesicular transport	11	2658.95	2592.49	993	942	0.354275	0.38303
Ld1S_110032100	myotubularin-associated protein, putative	11	1781.5	1858.48	787	639	0.358687	0.423465
Ld1S_110032200	cytoplasmic translation machinery associated protein, putative	11	546.46	499.52	604	741	1.356	1.20916
Ld1S_110032300	DEAD-boc ATP-dependent (RNA) helicase, putative	11	1607.29	1693.79	432	433	0.269398	0.255049
Ld1S_110032400	hypothetical protein	11	647.317	618.402	352	359	0.554597	0.569209
Ld1S_110032500	acidocalcisomal pyrophosphatase	11	1232.29	1172.46	1544	1453	1.17911	1.31689
Ld1S_110032600	pterin-4-alpha-carbinolamine dehydratase, putative	11	445.603	464.619	446	684	1.535	0.959925
Ld1S_110032700	Rad51, putative	11	1447.75	1444.03	540	506	0.349507	0.373954
Ld1S_110032800	proteasome alpha 7 subunit, putative	11	749.09	805.995	2144	2743	3.66177	2.66007
Ld1S_110032900	serine/threonine protein kinase, putative	11	2559.93	2508.51	528	668	0.260945	0.210484
Ld1S_110033000	hypothetical protein	11	1591.7	1757.05	1008	1161	0.729408	0.57369
Ld1S_110033100	NADH-cytochrome b5 reductase-like protein	11	947.136	977.228	277	250	0.263954	0.283455
Ld1S_110033200	hypothetical protein	11	497.865	535.512	183	221	0.443895	0.341729
Ld1S_110033300	hypothetical protein	11	563.881	520.243	209	252	0.446903	0.401735
Ld1S_110033400	hypothetical protein	11	1339.56	1332.78	1083	1342	1.00182	0.812586
Ld1S_110033500	Sec20, putative	11	846.28	784.182	276	282	0.333223	0.351959
Ld1S_110033600	hypothetical protein	11	4953.9	4792.34	1377	1207	0.243646	0.287333
Ld1S_110033700	PIF1 helicase-like protein, putative	11	3196.24	3073.47	1241	1481	0.463357	0.403778
Ld1S_110033800	PIF1 helicase-like protein, putative	11	2676.37	2675.38	914	1129	0.42184	0.341634
Ld1S_110033900	hypothetical protein	11	1353.31	1231.35	214	195	0.144091	0.173793
Ld1S_110034000	14-3-3 protein 2, putative	11	752.758	683.841	3069	4525	6.01123	4.48788
Ld1S_110034100	Optic atrophy 3 protein (OPA3), putative	11	1159.85	1167	568	655	0.564727	0.486717
Ld1S_110034200	hypothetical protein	11	1603.62	1590.18	1052	1125	0.701537	0.661562
Ld1S_110034300	Domain of unknown function(DUF2779), putative	11	2965.19	3072.38	1678	1662	0.560504	0.546157
Ld1S_110034400	hypothetical protein	11	1385.4	1464.75	552	571	0.412154	0.376856
Ld1S_110034500	tubulin-tyrsoine ligase-like protein	11	3190.74	3096.37	1522	1371	0.429681	0.491543
Ld1S_110034600	Nucleolar protein 89, putative	11	2296.78	2224.94	1324	893	0.388805	0.595073
Ld1S_110034700	regulator of chromatin condensation, putative	11	2157.42	2126.78	750	551	0.255398	0.352646
Ld1S_110034800	hypothetical protein	11	1632.05	1746.14	563	573	0.351093	0.322425
Ld1S_110034900	hypothetical protein	11	1446.84	1400.4	559	549	0.379449	0.399171
Ld1S_110035000	DNA ligase, putative	11	2051.98	1938.1	826	985	0.480025	0.426192
Ld1S_110035100	hypothetical protein	11	1711.81	1592.36	1018	1007	0.588265	0.639304
Ld1S_110035200	pumilio-repeat, RNA-binding protein, putative	11	2111.57	2152.96	1096	663	0.313984	0.509068
Ld1S_110036000	mRNA cap guanine-N7 methyltransferase, putative	11	2879.92	2746.27	1680	1051	0.364941	0.611738
Ld1S_110036100	tetratricopeptide repeat (TPR) protein	11	1190.11	1089.57	571	591	0.496593	0.524062
Ld1S_110036200	hypothetical protein	11	451.105	416.631	627	795	1.76234	1.50493
Ld1S_110036300	protein kinase, putative	11	1487.18	1517.1	1364	1575	1.05905	0.899082
Ld1S_110036400	amino acid permease/transporter, putative	11	1340.48	1136.46	1377	1394	1.03993	1.21165
Ld1S_110036500	Pseudouridylate synthase 10. Translation, ribosomal structure and biogenesis	11	1941.03	1616.35	365	239	0.12313	0.225817
Ld1S_110036600	Protein of unknown function (DUF563), putative	11	1811.75	1819.21	1466	2063	1.13868	0.805842
Ld1S_110036700	nucleobase transporter	11	1524.77	1505.11	3	4	0.00262335	0.00199322
Ld1S_110036800	nucleobase transporter	11	1487.18	1581.45	3	2	0.00134483	0.00189699
Ld1S_110036900	transcription modulator/accessory protein, putative	11	2926.68	2768.09	1570	1535	0.524485	0.567179
Ld1S_110037000	hypothetical protein	11	353.915	358.826	238	239	0.675303	0.663274
Ld1S_110037100	cytochrome b5, putative	11	519.871	495.158	356	531	1.02141	0.718963
Ld1S_110037200	3-methylcrotonoyl-CoA carboxylase beta subunit, putative	11	1417.5	1444.03	1491	1674	1.18096	1.03253
Ld1S_110037300	Nucleolar protein 47, putative	11	1578.87	1409.13	942	735	0.465524	0.668499
Ld1S_110037400	conserved protein, unknown function	11	2793.73	2714.64	286	284	0.101656	0.105355
Ld1S_110037500	metallo-peptidase, Clan MF, Family M17 (fragment)	11	920.547	906.335	98	136	0.147738	0.108128
Ld1S_110037600	metallo-peptidase, Clan MF, Family M17 (fragment)	11	1599.95	1437.48	1027	959	0.599392	0.714442
Ld1S_110037700	hypothetical protein	11	4908.05	4847.97	1348	1257	0.25611	0.278055
Ld1S_110037800	Protein Associated with Differentiation, putative;major facilitator superfamily, putative	11	1722.82	1658.89	217	239	0.138726	0.130811
Ld1S_110037900	Protein Associated with Differentiation, putative;major facilitator superfamily, putative	11	1922.7	1798.49	1029	1117	0.580955	0.572146
Ld1S_110038000	Major Facilitator Superfamily/Nodulin-like, putative	11	1280.88	1244.44	279	309	0.24124	0.224197
Ld1S_110038400	Nodulin-like/Major Facilitator Superfamily, putative	11	1196.53	1141.92	90	63	0.0526524	0.0788148
Ld1S_110038500	Ankyrin repeats (3 copies)/Ankyrin repeats (many copies), putative	11	790.35	738.374	426	535	0.676915	0.576943
Ld1S_110038600	anion-transporting ATPase-like protein	11	1286.38	1179	1071	1016	0.789812	0.908398
Ld1S_110038700	hypothetical protein	11	1297.38	1197.54	554	625	0.481739	0.462615
Ld1S_110038800	PUF nine target 1	11	1832.84	1576	3685	4597	2.50813	2.3382
Ld1S_110038900	Heat shock protein HslVU, ATPase subunit. Posttranslational modification, protein turnover, chaperones	11	3220.08	3081.1	1102	1016	0.31552	0.357664
Ld1S_110039000	hypothetical protein	11	1186.44	1107.02	585	562	0.473685	0.528448
Ld1S_110039100	hypothetical protein	11	594.138	630.399	462	531	0.893732	0.732869
Ld1S_110039200	40S ribosomal protein S21, putative (fragment)	11	593.221	582.41	2456	2422	4.0828	4.21696
Ld1S_110039300	40S ribosomal protein S21, putative (fragment)	11	534.541	504.974	2484	2263	4.23354	4.91907
Ld1S_110039400	hypothetical protein	11	640.899	638.034	660	811	1.26541	1.03443
Ld1S_110039500	hypothetical protein	11	528.122	556.235	437	630	1.19291	0.78564
Ld1S_110039600	EF hand family protein. Function unknown	11	2832.24	2541.23	1244	1264	0.44629	0.489527
Ld1S_110039700	hypothetical protein	11	969.141	789.635	1174	1041	1.07415	1.48676
Ld1S_110039800	hypothetical protein	11	3596.92	3579.53	1803	1747	0.485694	0.503697
Ld1S_110039900	Alpha/beta hydrolase family, putative	11	717.917	678.388	323	388	0.540453	0.476129
Ld1S_110040000	Alpha/beta hydrolase family, putative	11	1290.97	1312.06	944	1111	0.860596	0.71948
Ld1S_110040100	PDS5, regulator of cohesion maintenance, homolog. Function unknown	11	4638.49	4438.97	1062	1006	0.216881	0.239245
Ld1S_110040200	kinesin, putative	11	4131.46	3671.15	850	911	0.220503	0.231535
Ld1S_110040300	START domain containing protein, putative	11	1122.26	1109.2	1232	1656	1.47559	1.11071
Ld1S_110040400	hypothetical protein	11	1142.43	1060.12	2661	3564	3.11966	2.5101
Ld1S_110040500	Leucine Rich repeat, putative	11	2530.59	2421.26	1597	1856	0.733427	0.659575
Ld1S_110040600	60S ribosomal protein L24, putative	11	494.198	530.059	706	690	1.3962	1.33193
Ld1S_110040700	ATPase, putative	11	4309.33	4004.89	1328	917	0.212794	0.331595
Ld1S_110040800	Short C-terminal domain/PUB domain containing protein, putative	11	1736.57	1633.8	486	448	0.25798	0.297466
Ld1S_110041000	tRNA-Arg	11	60.514	54.5328	4	13	0.214826	0.0733503
Ld1S_110041100	5S(MS) ribosomal RNA	11	134.781	117.791	15	38	0.281938	0.127344
Ld1S_110041200	hypothetical protein	11	1065.41	964.14	632	781	0.733049	0.655506
Ld1S_110041300	hypothetical protein	11	2030.89	1923.92	1088	1149	0.565762	0.565513
Ld1S_110041400	hypothetical protein	11	1150.68	1137.55	993	1159	1.00723	0.872925
Ld1S_110041500	40S ribosomal protein S5 (fragment)	11	561.13	568.232	2149	2914	5.19309	3.78191
Ld1S_110041600	40S ribosomal protein S5 (fragment)	11	623.478	555.144	4196	7130	11.4358	7.5584
Ld1S_110041700	HIT zinc finger, putative	11	1397.32	1421.12	932	961	0.687743	0.655819
Ld1S_110041800	adaptin-related protein-like protein	11	2624.11	2519.42	678	564	0.21493	0.26911
Ld1S_110041900	pyruvate phosphate dikinase, putative	11	2456.32	2325.28	6189	8589	3.49669	2.66162
Ld1S_110042000	inositol-1,4,5-trisphosphate (IP3) 5- phosphatase, putative	11	1874.1	1803.95	900	911	0.4861	0.498907
Ld1S_110042100	hypothetical protein	11	3087.13	3178.17	677	957	0.309996	0.213016
Ld1S_110042200	hypothetical protein	11	848.113	759.097	1875	1548	1.82523	2.47004
Ld1S_110042300	hypothetical protein	11	2268.36	2175.86	514	689	0.303744	0.236229
Ld1S_110042400	protein transport protein SEC61 subunit alpha, putative	11	1215.78	1192.09	2138	2522	2.07439	1.79349
Ld1S_110042500	hypothetical protein	11	766.511	714.38	170	280	0.365292	0.237969
Ld1S_110042600	hypothetical protein	11	1165.35	1125.56	357	612	0.525162	0.317176
Ld1S_110042700	hypothetical protein	11	1284.55	1348.05	348	445	0.346425	0.25815
Ld1S_110042800	hypothetical protein	11	450.188	454.804	145	242	0.537554	0.318819
Ld1S_110042900	hypothetical protein	11	702.33	682.751	261	343	0.488375	0.382277
Ld1S_110043000	zinc finger domain protein, putative	11	1456	1448.39	1102	1293	0.888047	0.760844
Ld1S_110043100	zinc finger domain protein, putative	11	885.705	839.805	180	224	0.252906	0.214335
Ld1S_110043200	Lanosterol 14-alpha demethylase	11	1254.29	1121.19	1584	2320	1.84965	1.41278
Ld1S_110043400	hypothetical protein	11	954.471	876.887	742	949	0.994268	0.846175
Ld1S_110043600	protein transport protein SEC31, putative	11	2970.69	3121.46	1092	919	0.309356	0.349837
Ld1S_110043700	eukaryotic release factor 3, putative	11	2135.41	1883.56	3354	2876	1.34681	1.78067
Ld1S_110043800	60Kd inner membrane protein, putative	11	1093.84	1079.75	1281	1362	1.24516	1.18639
Ld1S_110043900	40S ribosomal protein S15A, putative	11	441.019	474.435	3027	3457	7.83867	6.38022
Ld1S_110044000	Organic solute transporter Ostalpha, putative	11	1800.75	1774.5	1098	1205	0.669165	0.618767
Ld1S_110044100	SKP1-like protein	11	541.876	497.339	1457	1700	3.13725	2.92959
Ld1S_110044200	ATP-binding cassette subfamily A, member 1, putative	11	4660.5	4546.95	612	894	0.191825	0.134596
Ld1S_110044800	ATP-binding cassette subfamily A, member 1, putative	11	6174.27	6251.64	1703	1823	0.295258	0.272408
Ld1S_110044900	ATP-binding cassette subfamily A, member 1, putative	11	10823.8	11382.1	1418	2087	0.192817	0.124582
Ld1S_110045000	ATP-binding cassette protein subfamily A, member 2, putative	11	1058.08	1085.2	218	326	0.308106	0.200884
Ld1S_110045100	ATP-binding cassette protein subfamily A, member 9, putative;ATP-binding cassette protein subfamily A, member 6, putative;ATP-binding cassette protein subfamily A, member 3, putative (fragment);ATP-binding cassette protein subfamily A, member 7, putative;	11	5386.67	5182.8	486	913	0.169493	0.0937717
Ld1S_110045200	tatD related deoxyribonuclease, putative	11	850.864	869.253	1157	1325	1.55724	1.33103
Ld1S_110045300	ATP-binding cassette protein subfamily A, member 9, putative;ATP-binding cassette protein subfamily A, member 6, putative;ATP-binding cassette protein subfamily A, member 3, putative (fragment);ATP-binding cassette protein subfamily A, member 7, putative;	11	3845.39	3786.76	455	883	0.229625	0.120156
Ld1S_110045400	hypothetical protein	11	507.034	560.597	378	542	1.06896	0.674281
Ld1S_110045500	hypothetical protein	11	1108.51	1092.84	758	1066	0.961654	0.693607
Ld1S_110045600	hypothetical protein	11	1198.36	1219.35	649	657	0.548249	0.532249
Ld1S_110045700	Flagellar-associated PapD-like, putative	11	4406.52	4308.09	1761	1743	0.39555	0.408766
Ld1S_110045800	Nodulin-like/Major Facilitator Superfamily, putative	11	1547.69	1609.81	625	619	0.39995	0.388245
Ld1S_110045900	hypothetical protein	11	661.987	591.136	762	1027	1.55139	1.28904
Ld1S_110046000	ribosomal protein L4/L1 family, putative	11	1158.02	1257.53	1034	853	0.736603	0.822249
Ld1S_110046100	tRNA pseudouridine synthase D (TruD), putative	11	1594.45	1541.1	743	734	0.460346	0.482124
Ld1S_110046200	hypothetical protein	11	301.653	292.296	205	263	0.871862	0.701344
Ld1S_110046300	Variant SH3 domain containing protein, putative	11	1025.07	1085.2	805	987	0.96286	0.741797
Ld1S_120046400	translation initiation factor EIF-2b alpha subunit, putative	12	811.438	1193.18	1103	907	1.11777	0.924422
Ld1S_120046500	PITH domain-containing protein	12	647.317	899.791	847	728	1.12464	0.941329
Ld1S_120046600	proteasome beta-1 subunit, putative	12	793.101	1193.18	2830	3065	3.86458	2.37182
Ld1S_120046700	Mitochondrial SSU ribosomal protein 29, putative	12	1232.29	1773.41	1763	1416	1.14908	0.994132
Ld1S_120046800	hypothetical protein	12	383.256	536.603	559	665	1.73513	1.04174
Ld1S_120046900	kinetoplastid-specific phospho-protein phosphatase	12	1333.14	1777.77	1440	1122	0.84162	0.810004
Ld1S_120047000	ribonuclease mar1	12	657.402	827.808	1509	1626	2.47337	1.82289
Ld1S_120047100	hypothetical protein	12	1949.29	2619.76	1338	867	0.444778	0.510735
Ld1S_120047200	hypothetical protein	12	344.747	444.988	197	105	0.304572	0.442709
Ld1S_120047300	kinetoplastid kinetochore protein 6, putative	12	616.143	835.443	1038	920	1.49316	1.24246
Ld1S_120047400	hypothetical protein	12	1522.02	1845.39	1338	950	0.624171	0.72505
Ld1S_120047500	ornithine decarboxylase, putative	12	805.937	1115.74	756	411	0.509965	0.677577
Ld1S_120047600	FYVE-type domain-containing protein	12	2098.74	2760.45	1309	833	0.396905	0.474198
Ld1S_120047700	hypothetical protein	12	3269.59	4437.88	2130	1451	0.443786	0.479959
Ld1S_120047800	Cell division protein kinase, putative	12	1543.11	2277.29	1758	1397	0.905316	0.77197
Ld1S_120047900	hypothetical protein	12	1359.73	1793.04	1241	888	0.65307	0.692121
Ld1S_120048000	leucine-rich repeat protein, putative	12	3143.98	4276.46	1545	1045	0.332381	0.36128
Ld1S_120048100	dolichyl-P-Man:GDP-Man5GlcNAc2-PP-dolichyl alpha-1,2-mannosyltransferase, putative	12	2359.13	3207.62	978	725	0.307317	0.304899
Ld1S_120048200	hypothetical protein	12	1332.23	1707.97	581	438	0.328773	0.34017
Ld1S_120048300	hypothetical protein	12	2503.08	3372.31	923	561	0.224124	0.2737
Ld1S_120048400	ubiquitin hydrolase, putative	12	4760.44	6370.52	1721	1134	0.238213	0.270151
Ld1S_120048500	hypothetical protein	12	3090.8	4378.98	1241	985	0.318688	0.283399
Ld1S_120048600	proteasome regulatory ATPase subunittcc1l8.3, putative	12	1212.11	1535.64	1399	1220	1.00651	0.911019
Ld1S_120048700	glyoxalase II, putative	12	823.358	1183.36	1247	1009	1.22547	1.05378
Ld1S_120048800	hypothetical protein	12	3399.79	4568.76	1440	837	0.246192	0.315184
Ld1S_120048900	function. Function unknown	12	2208.76	2568.5	1091	987	0.446857	0.424762
Ld1S_120049000	cysteinyl-tRNA synthetase, putative	12	2332.54	3185.81	5147	3472	1.48851	1.6156
Ld1S_120049100	Helicase associated domain (HA2), putative	12	7554.17	9847.53	2156	1366	0.180827	0.218938
Ld1S_120049200	hypothetical protein	12	1807.17	2414.71	584	411	0.227428	0.241851
Ld1S_120049300	ornithine decarboxylase	12	2098.74	2734.27	1895	2196	1.04634	0.693054
Ld1S_120049400	hypothetical protein	12	4584.4	6189.47	1474	1148	0.250415	0.238146
Ld1S_120049500	hypothetical protein	12	5394.92	7089.26	2291	1070	0.198335	0.323165
Ld1S_120049600	hypothetical protein	12	1893.36	2397.26	869	518	0.273588	0.362497
Ld1S_120049700	Myotubularin-related protein, putative	12	8916.65	11853.3	2445	1763	0.19772	0.206273
Ld1S_120049800	hypothetical protein	12	2598.44	3333.04	788	553	0.21282	0.23642
Ld1S_120049900	hypothetical protein	12	5803.85	7365.2	1522	1186	0.204347	0.206647
Ld1S_120050000	CCR4-NOT transcription complex subunit 2, putative	12	1658.63	2139.87	1549	971	0.585421	0.723877
Ld1S_120050100	Glutathione S-transferase, N-terminal domain containing protein, putative	12	1124.09	1321.88	794	503	0.447471	0.600662
Ld1S_120050200	hypothetical protein	12	984.728	1238.99	817	623	0.632662	0.659411
Ld1S_120050300	pumillio protein 4, putative	12	4220.4	5525.26	1911	1143	0.270828	0.345866
Ld1S_120050400	HIV-1 Tat interactive protein 2, 30kDa. Signal transduction mechanisms	12	1319.39	1646.89	1308	1185	0.898143	0.794224
Ld1S_120050500	3'-nucleotidase/nuclease, putative	12	746.34	1041.58	3785	2823	3.78246	3.63391
Ld1S_120050600	hypothetical protein	12	1325.81	1521.47	211	237	0.178759	0.138682
Ld1S_120050700	Eukaryotic protein of unknown function (DUF866), putative	12	937.051	1282.61	1511	1360	1.45136	1.17807
Ld1S_120050800	hypothetical protein	12	621.644	700.201	726	651	1.04722	1.03684
Ld1S_120050900	hypothetical protein	12	1959.37	2619.76	659	452	0.230686	0.25155
Ld1S_120051000	hypothetical protein	12	1864.93	2460.52	904	536	0.28741	0.367402
Ld1S_120051100	hypothetical protein	12	2961.52	3930.72	2888	1983	0.669589	0.734725
Ld1S_120051200	hypothetical protein	12	2275.69	2890.24	115	223	0.0979921	0.0397891
Ld1S_120051300	hypothetical protein	12	2108.82	2662.29	55	96	0.045523	0.0206589
Ld1S_120051400	hypothetical protein	12	1764.99	2127.87	18	20	0.0113315	0.00845916
Ld1S_120051500	hypothetical protein	12	921.464	1185.54	31	26	0.028216	0.0261484
Ld1S_120051600	hypothetical protein	12	3127.48	4086.69	529	625	0.199842	0.129445
Ld1S_120051700	Caltractin. Function unknown	12	674.823	824.536	414	341	0.505318	0.502101
Ld1S_120051800	WW domain containing protein, putative	12	2687.37	3388.67	1208	830	0.308852	0.356482
Ld1S_120051900	vacuolar ATP synthase subunit, putative	12	473.11	651.122	1285	1427	3.01621	1.97352
Ld1S_120052000	glucose-6-phosphate isomerase	12	1735.65	2233.66	5295	5481	3.15789	2.37054
Ld1S_120052100	Present in the outer mitochondrial membrane proteome 18	12	657.402	864.89	987	841	1.27928	1.14119
Ld1S_120052200	Mannosyltransferase-like protein. Cell wall/membrane/envelope biogenesis	12	1586.2	2168.22	491	358	0.225696	0.226453
Ld1S_120052300	General transcription factor IIIC, polypeptide 3. Transcription	12	3825.22	4855.6	1548	1171	0.306126	0.318807
Ld1S_120052400	Fusaric acid resistance protein-like, putative	12	5173.03	6681.36	1165	643	0.124298	0.174366
Ld1S_120052500	Fusaric acid resistance protein-like, putative	12	5247.3	6913.67	1121	1340	0.255369	0.162143
Ld1S_120052600	hypothetical protein	12	1499.1	2164.95	1618	1243	0.829165	0.747361
Ld1S_120052700	TPR repeat, putative	12	3037.62	3922	834	458	0.150776	0.212647
Ld1S_120052800	hypothetical protein	12	4000.34	5130.45	1199	890	0.222481	0.233703
Ld1S_120052900	alanine aminotransferase, putative	12	1506.43	1970.82	1579	1568	1.04087	0.801191
Ld1S_120053000	primase 2, putative	12	1694.39	2221.67	822	669	0.394832	0.369993
Ld1S_120053100	hypothetical protein	12	2079.48	2498.69	1648	1286	0.618423	0.659545
Ld1S_120053200	ser/thr protein phosphatase, putative	12	2644.28	3454.11	1574	1375	0.51999	0.455689
Ld1S_120053300	cytochrome oxidase subunit IV, putative	12	1230.45	1577.09	5012	3892	3.16307	3.17801
Ld1S_120053400	Bardet-Biedl syndrome 5 protein	12	1466.09	1739.6	1342	1005	0.685497	0.771443
Ld1S_120053500	hypothetical protein	12	532.707	688.204	1104	1118	2.09872	1.60418
Ld1S_120053600	Leucine Rich repeat, putative	12	2450.82	3090.92	1486	1044	0.42598	0.480763
Ld1S_120053700	Protein of unknown function (DUF962), putative	12	383.256	479.889	505	412	1.075	1.05233
Ld1S_120053800	Protein of unknown function (DUF962), putative	12	439.185	522.424	182	267	0.607944	0.348376
Ld1S_120053900	hypothetical protein	12	1460.59	1737.42	163	86	0.0588804	0.0938175
Ld1S_120054000	hypothetical protein	12	4931.89	5703.04	1032	1448	0.293599	0.180956
Ld1S_120054100	hypothetical protein	12	819.69	884.522	91	125	0.152497	0.10288
Ld1S_120054200	protein, conserved. Source GeneDB. Function unknown	12	4605.48	5938.62	139	84	0.0182391	0.0234061
Ld1S_120054300	hypothetical protein	12	2925.76	3135.64	82	98	0.0334955	0.026151
Ld1S_120054700	hypothetical protein	12	1003.07	1161.55	1	0	0	0.00086092
Ld1S_120054900	hypothetical protein	12	867.368	882.341	2	0	0	0.0022667
Ld1S_120055000	hypothetical protein	12	3077.05	3337.41	121	114	0.0370485	0.0362557
Ld1S_120055100	hypothetical protein	12	5028.17	5411.84	4	2	0.000397759	0.000739121
Ld1S_120055200	hypothetical protein	12	8983.58	10548.8	3688	6246	0.695268	0.349612
Ld1S_120055300	hypothetical protein	12	5383.92	6479.59	235	125	0.0232173	0.0362677
Ld1S_120055400	protein, conserved. Source GeneDB. Function unknown	12	4452.37	5456.55	44	30	0.00673799	0.0080637
Ld1S_120055500	hypothetical protein	12	3193.49	3410.48	2	1	0.000313137	0.000586427
Ld1S_120055600	protein, conserved. Source GeneDB. Function unknown	12	2357.3	3276.33	2	1	0.000424215	0.000610439
Ld1S_120055700	surface antigen protein 2, putative	12	4967.65	6213.47	9979	11847	2.38483	1.60603
Ld1S_120055800	hypothetical protein	12	3656.51	4838.15	394	330	0.0902499	0.0814361
Ld1S_120055900	protein, conserved. Source GeneDB. Function unknown	12	4619.24	5663.78	37	17	0.00368026	0.00653274
Ld1S_120056000	Coiled-coil domain containing 104. Function unknown	12	3165.07	3980.89	801	1348	0.425899	0.201211
Ld1S_120056100	hypothetical protein	12	1695.31	1989.36	69	18	0.0106175	0.0346846
Ld1S_120056200	hypothetical protein	12	1482.59	2110.42	609	818	0.551736	0.288568
Ld1S_120056300	hypothetical protein	12	1897.02	2243.48	11	4	0.00210857	0.0049031
Ld1S_120056400	protein, conserved. Source GeneDB. Function unknown	12	5107.93	6192.75	150	68	0.0133126	0.0242219
Ld1S_120056500	hypothetical protein	12	3762.87	5128.26	784	772	0.205162	0.152878
Ld1S_120056600	hypothetical protein	12	4642.16	5968.07	2124	1685	0.362978	0.355894
Ld1S_120056700	DnaJ domain containing protein, putative	12	2063.9	2770.27	1926	2220	1.07564	0.69524
Ld1S_120056800	Flagellum attachment zone protein 2	12	3859.15	4901.41	2089	1713	0.443881	0.426204
Ld1S_120056900	ec 3.5.1.14. Amino acid transport and metabolism	12	403.427	448.26	38	59	0.146247	0.0847723
Ld1S_120057000	Activating nitroreductase NTR2	12	1070	1561.82	1307	1102	1.02991	0.836844
Ld1S_120057100	n-ethylmaleimide reductase-like protein	12	2418.73	2940.41	566	801	0.331166	0.19249
Ld1S_120057200	hypothetical protein	12	3159.57	4113.95	758	632	0.200027	0.184251
Ld1S_120057300	Putative integral membrane protein conserved region (DUF2404), putative	12	2485.66	3461.74	922	683	0.274776	0.26634
Ld1S_120057400	Putative integral membrane protein conserved region (DUF2404), putative	12	2093.24	2710.28	654	566	0.270395	0.241303
Ld1S_120057500	hypothetical protein	12	2467.32	3241.43	1145	669	0.271144	0.353239
Ld1S_120057600	ABC transporter, putative	12	4648.58	6006.24	1275	924	0.19877	0.212279
Ld1S_120057700	hypothetical protein	12	1577.95	2151.86	589	499	0.316233	0.273716
Ld1S_120057800	transfer protein. Lipid transport and metabolism	12	2887.25	3673.33	879	556	0.192571	0.239292
Ld1S_120057900	WD repeat and HMG-box DNA-binding protein, putative	12	3859.15	5045.38	1101	699	0.181128	0.21822
Ld1S_120058000	SNARE associated Golgi protein, putative	12	1064.5	1389.5	552	504	0.473463	0.397266
Ld1S_120058100	function. Posttranslational modification, protein turnover, chaperones	12	2568.18	3337.41	1159	880	0.342655	0.347276
Ld1S_120058200	puromycin-sensitive aminopeptidase-like protein	12	3905.91	4935.22	1507	1110	0.284185	0.305356
Ld1S_120058300	hypothetical protein	12	1218.53	1661.07	1037	984	0.807529	0.624297
Ld1S_120058400	arginine N-methyltransferase-like protein	12	1068.16	1346.96	2820	1760	1.64769	2.0936
Ld1S_120058500	hypothetical protein	12	1754.91	2424.53	779	578	0.329362	0.3213
Ld1S_120058600	hypothetical protein	12	695.911	787.454	389	303	0.4354	0.493997
Ld1S_120058700	SET domain containing protein, putative	12	1809	2266.38	1395	1058	0.584853	0.615518
Ld1S_120058800	Ribonuclease H2 non-catalytic subunit (Ylr154p-like), putative	12	445.603	557.325	452	409	0.917857	0.811017
Ld1S_120058900	FAM91 N-terminus/FAM91 C-terminus, putative	12	2459.07	3145.45	784	596	0.242368	0.249249
Ld1S_120059000	Vacuolar sorting protein 39 domain 1/Vacuolar sorting protein 39 domain 2, putative	12	2832.24	3603.53	1092	726	0.256334	0.303036
Ld1S_120059100	Alpha/beta hydrolase domain-containing protein	12	1751.24	2339.46	955	627	0.358032	0.408214
Ld1S_120059200	hypothetical protein	12	1279.05	1632.71	470	294	0.229859	0.287865
Ld1S_130059300	WD40. Function unknown	13	1848.43	1826.85	621	439	0.237499	0.33993
Ld1S_130059400	cis-prenyltransferase-like protein	13	1076.42	1148.46	792	1029	0.95595	0.689619
Ld1S_130059500	hypothetical protein	13	681.241	751.462	651	808	1.18607	0.866311
Ld1S_130059600	hypothetical protein	13	772.012	805.995	886	1207	1.56345	1.09926
Ld1S_130059700	ribonuclease HII, putative	13	687.659	765.641	691	942	1.36986	0.902512
Ld1S_130059800	hypothetical protein	13	1567.86	1447.3	502	677	0.431798	0.346853
Ld1S_130059900	hypothetical protein	13	809.604	840.896	754	981	1.2117	0.896663
Ld1S_130060000	mitochondrial DNA polymerase I protein B, putative	13	3635.43	3566.45	2577	2718	0.747643	0.722568
Ld1S_130060100	carboxypeptidase, putative;metallo-peptidase, Clan MA(E) Family M32	13	1400.99	1416.76	2574	3253	2.32193	1.81682
Ld1S_130060200	hypothetical protein	13	1016.82	1066.66	262	375	0.368797	0.245626
Ld1S_130060300	SURF1 family, putative	13	959.056	880.159	878	983	1.02497	0.997547
Ld1S_130060400	hypothetical protein	13	405.261	404.633	208	225	0.555198	0.514046
Ld1S_130060500	Kinesin-13 2, putative	13	1996.96	1962.09	700	871	0.436162	0.356762
Ld1S_130060600	hypothetical protein	13	565.715	500.611	674	692	1.22323	1.34635
Ld1S_130060700	hypothetical protein	13	1377.15	1337.14	677	551	0.400101	0.506303
Ld1S_130060800	protein kinase A regulatory subunit	13	1261.63	1308.79	1803	3018	2.39215	1.37761
Ld1S_130060900	MOZ/SAS family acetyltransferase, putative	13	1763.16	1654.53	989	1309	0.742417	0.597755
Ld1S_130061000	Tetratricopeptide repeat, putative	13	1169.02	1109.2	406	337	0.288275	0.36603
Ld1S_130061100	hypothetical protein	13	714.249	761.278	243	564	0.789641	0.3192
Ld1S_130061200	Lipase (class 3), putative	13	2036.39	1986.08	475	724	0.355531	0.239164
Ld1S_130061300	Triglyceride lipase, putative	13	1724.65	1895.56	416	510	0.295712	0.21946
Ld1S_130061400	ras-related protein RAB5B, putative	13	712.415	665.3	618	700	0.982573	0.928904
Ld1S_130061500	zinc-RING finger domain containing protein, putative	13	1226.78	1143.01	284	338	0.275517	0.248467
Ld1S_130061600	Domain of unknown function (DUF4200), putative	13	843.529	761.278	949	1319	1.56367	1.24659
Ld1S_130061700	Nucleoporin NUP48	13	1584.37	1526.92	596	553	0.349035	0.390329
Ld1S_130061800	N-acetyltransferase subunit ARD1, putative	13	783.932	795.088	786	784	1.00009	0.988569
Ld1S_130061900	hypothetical protein	13	4430.36	4565.49	1776	1768	0.399065	0.389006
Ld1S_130062800	alpha tubulin	13	1172.69	1023.04	45	83	0.0707775	0.0439867
Ld1S_130063000	Sister chromatid cohesion C-terminus, putative	13	5608.55	5544.9	1340	1397	0.249084	0.241664
Ld1S_130063100	hypothetical protein	13	2966.1	2785.54	1018	1073	0.361754	0.365459
Ld1S_130063200	long-chain-fatty-acid-CoA ligase, putative	13	1627.46	1737.42	1855	2216	1.36163	1.06768
Ld1S_130063300	Flagellar radial spoke protein 4/6	13	1607.29	1585.81	1570	1889	1.17527	0.990028
Ld1S_130063400	mitogen-activated protein kinase kinase 2	13	2730.47	2818.26	1496	1295	0.474278	0.530825
Ld1S_130063500	ALBA-domain protein 1	13	415.346	466.801	15046	21850	52.6067	32.2322
Ld1S_130063600	C2 domain containing protein, putative	13	1288.22	1272.8	4631	6188	4.80354	3.63845
Ld1S_130063700	hypothetical protein	13	1266.21	1161.55	1044	1056	0.833985	0.8988
Ld1S_130063800	TATA element modulatory factor 1 TATA binding, putative	13	1929.11	1941.37	2255	2493	1.2923	1.16155
Ld1S_130063900	Histidine phosphatase superfamily (branch 1), putative	13	1445	1398.22	1125	1393	0.964013	0.804594
Ld1S_130064000	ATP-dependent RNA helicase, putative	13	5460.02	5474	3639	3246	0.594504	0.664779
Ld1S_130064100	hypothetical protein	13	745.423	764.55	1134	1304	1.74934	1.48323
Ld1S_130064200	Protein of unknown function (DUF1014), putative	13	850.864	841.986	1099	1031	1.21171	1.30525
Ld1S_130064300	hypothetical protein	13	3277.84	3153.09	962	1056	0.322163	0.305098
Ld1S_130064400	hypothetical protein	13	649.151	598.77	700	762	1.17384	1.16906
Ld1S_130064500	Uncharacterized ACR, COG1678, putative	13	1875.02	1741.78	1148	915	0.487995	0.659097
Ld1S_130064600	60S ribosomal protein L18, putative	13	655.569	620.583	4231	3803	5.80107	6.81778
Ld1S_130064700	40S ribosomal protein S12, putative	13	457.523	472.254	18450	27693	60.5281	39.068
Ld1S_130064800	hypothetical protein	13	5146.44	4893.77	2196	1818	0.353254	0.448733
Ld1S_130064900	hypothetical protein	13	972.809	911.788	825	1137	1.16878	0.904815
Ld1S_130065000	Protein of unknown function, DUF607, putative	13	892.124	826.717	648	754	0.845174	0.783823
Ld1S_130065100	actyltransferase-like protein	13	885.705	905.245	695	1006	1.13582	0.767748
Ld1S_130065200	hypothetical protein	13	1360.65	1282.61	602	598	0.439496	0.469355
Ld1S_130065300	hypothetical protein	13	767.428	736.193	335	322	0.419583	0.455044
Ld1S_130065400	importin. Intracellular trafficking, secretion, and vesicular transport;Nuclear structure	13	3850.89	3650.43	1807	1501	0.38978	0.495011
Ld1S_130065500	palmitoyl acyltransferase 6, putative	13	1577.03	1516.01	1107	980	0.62142	0.730205
Ld1S_130065600	U-box domain containing protein, putative	13	1964.87	1893.38	1112	1115	0.567467	0.58731
Ld1S_130065700	mannose-specific lectin, putative	13	1290.05	1226.99	1501	1448	1.12244	1.22332
Ld1S_130065800	Metallopeptidase family M24, putative	13	1653.13	1555.28	677	483	0.292172	0.435293
Ld1S_130065900	PSP1 C-terminal conserved region, putative	13	2597.52	2407.08	1218	1146	0.44119	0.506008
Ld1S_130066000	kinesin, putative	13	4235.07	3989.62	503	553	0.130576	0.126077
Ld1S_130066100	Putative GTPase activating protein for Arf, putative	13	1367.07	1325.15	431	159	0.116307	0.325247
Ld1S_130066200	oxidoreductase-like protein	13	883.872	898.701	359	264	0.298686	0.399466
Ld1S_130066300	ubiquitin-like protein	13	2228.93	2227.12	1622	1194	0.535682	0.728295
Ld1S_130066400	Calcium-activated chloride channel, putative	13	2570.01	2447.43	820	653	0.254084	0.335045
Ld1S_130066500	hypothetical protein	13	733.503	666.391	327	300	0.408996	0.490703
Ld1S_130066600	C2 domain containing protein, putative	13	5591.13	5237.33	1779	1694	0.30298	0.339677
Ld1S_130066700	Dual specificity phosphatase, catalytic domain containing protein, putative	13	1585.28	1545.46	506	445	0.280707	0.327411
Ld1S_130066800	protein kinase, putative	13	1579.78	1610.9	1479	1957	1.23878	0.918121
Ld1S_130066900	hypothetical protein	13	2056.56	2079.88	816	617	0.300016	0.39233
Ld1S_130067000	CCR4-NOT transcription complex, subunit 3. Transcription	13	672.073	730.74	414	392	0.58327	0.566549
Ld1S_130067100	hypothetical protein	13	7070.06	6700.99	2035	1682	0.237905	0.303686
Ld1S_130067200	Complex1_LYR-like, putative	13	873.786	824.536	689	735	0.841167	0.835621
Ld1S_130067300	hypothetical protein	13	3424.54	3157.45	1112	1088	0.317707	0.352183
Ld1S_130067400	hypothetical protein	13	3242.09	3087.65	807	688	0.212209	0.261364
Ld1S_130067500	hypothetical protein	13	4153.46	3767.13	878	819	0.197185	0.233069
Ld1S_130067600	hypothetical protein	13	1437.67	1281.52	472	431	0.299791	0.368312
Ld1S_130067700	mitochondrial processing peptidase alpha subunit, putative	13	1374.4	1294.61	4088	3637	2.64624	3.15771
Ld1S_130067800	hypothetical protein	13	1830.09	1753.77	2096	2755	1.50539	1.19514
Ld1S_130067900	hypothetical protein	13	1027.82	971.775	636	666	0.647972	0.654473
Ld1S_130068000	hypothetical protein	13	1816.34	1807.22	1323	1438	0.791703	0.732065
Ld1S_130068100	Leucine Rich repeat, putative	13	2160.17	2078.79	1389	1387	0.64208	0.668177
Ld1S_130068200	Axonemal dynein light chain, putative	13	3783.96	3908.91	1375	1242	0.328227	0.35176
Ld1S_130068300	glycosyltransferase family-like protein	13	916.879	812.539	629	720	0.785272	0.774117
Ld1S_130068400	N(2), N(2)-dimethylguanosine tRNA methyltransferase, putative	13	1942.87	1979.54	1106	888	0.457056	0.558715
Ld1S_130068500	actin-like protein, putative	13	1332.23	1334.96	641	552	0.414344	0.480163
Ld1S_130068600	katanin-like protein	13	1403.74	1411.31	715	790	0.562781	0.506622
Ld1S_130068700	hypothetical protein	13	1879.6	1863.93	1585	1532	0.815066	0.850353
Ld1S_130068800	AMP deaminase, putative	13	4929.14	4768.35	1905	1546	0.313645	0.399509
Ld1S_130068900	hypothetical protein	13	1561.45	1472.39	447	397	0.254252	0.303589
Ld1S_130069000	hypothetical protein	13	1537.61	1416.76	598	469	0.30502	0.422089
Ld1S_130069100	hypothetical protein	13	1076.42	1015.4	360	421	0.391113	0.35454
Ld1S_130069200	Cryptococcal mannosyltransferase 1, putative	13	3393.37	3358.13	1638	1346	0.396656	0.487771
Ld1S_130069300	hypothetical protein	13	1120.43	984.862	390	449	0.40074	0.395994
Ld1S_130069400	subtilisin peptidase	13	4727.43	4551.31	1354	1352	0.285991	0.297497
Ld1S_130069500	hypothetical protein	13	551.044	535.512	144	110	0.199621	0.268901
Ld1S_130069600	Dpy-30 motif containing protein, putative	13	676.657	664.21	539	674	0.996073	0.811491
Ld1S_130069700	NADH-cytochrome b5 reductase, putative	13	945.303	870.344	996	1269	1.34243	1.14438
Ld1S_130069800	Heat shock protein. Posttranslational modification, protein turnover, chaperones	13	6090.83	5879.73	3696	3941	0.647038	0.628601
Ld1S_130069900	hypothetical protein	13	3558.41	3482.46	1332	1201	0.33751	0.382488
Ld1S_130070000	proteasome regulatory ATPase subunit 2, putative	13	1105.76	1072.11	2120	2409	2.1786	1.9774
Ld1S_130070100	leucyl-tRNA synthetase, putative	13	2770.81	2558.68	6017	5729	2.06763	2.3516
Ld1S_130070200	hypothetical protein	13	1412.91	1334.96	1169	1228	0.869128	0.87568
Ld1S_130070300	DNA-directed RNA polymerase ii 8.2 Kd polypeptide, putative	13	345.664	286.843	359	371	1.0733	1.25156
Ld1S_130070400	Uncharacterised ACR, YagE family COG1723, putative	13	1665.97	1679.61	940	774	0.464594	0.559654
Ld1S_130070500	Alpha/beta hydrolase family, putative	13	1145.18	1061.21	746	859	0.750099	0.702972
Ld1S_130070600	hypothetical protein	13	890.29	799.451	980	1315	1.47705	1.22584
Ld1S_130070700	calmodulin, putative	13	650.067	556.235	736	974	1.49831	1.32318
Ld1S_130070800	hypothetical protein	13	1566.03	1387.31	934	936	0.59769	0.673243
Ld1S_130070900	dynein light chain Tctex-type, putative	13	408.928	381.73	546	860	2.10306	1.43033
Ld1S_130071000	adenylosuccinate synthetase, putative	13	1851.18	1788.68	1881	2133	1.15224	1.05162
Ld1S_130071100	hypothetical protein	13	557.463	627.127	716	793	1.42252	1.14171
Ld1S_130071200	nucleobase transporter	13	1256.12	1282.61	11868	8725	6.94597	9.253
Ld1S_130071300	40S ribosomal protein S4, putative	13	775.68	812.539	1466	2197	2.83235	1.80422
Ld1S_130071400	40S ribosomal protein S4, putative	13	896.708	919.423	1384	1396	1.55681	1.50529
Ld1S_130071500	Thiamin pyrophosphokinase, vitamin B1 binding domain containing protein, putative	13	1367.98	1201.9	412	498	0.364039	0.34279
Ld1S_130071700	hypothetical protein	13	498.782	482.07	289	373	0.747821	0.599498
Ld1S_130071800	hypothetical protein	13	541.876	536.603	282	516	0.952248	0.525528
Ld1S_130071900	hypothetical protein	13	427.266	425.356	61	88	0.205961	0.143409
Ld1S_130072000	DNA/RNA non-specific endonuclease-like protein	13	2099.65	2170.41	759	743	0.353868	0.349704
Ld1S_130072100	XPA-interacting protein, putative	13	922.381	865.981	986	910	0.986578	1.13859
Ld1S_130072200	hypothetical protein	13	2404.06	2219.49	937	779	0.324036	0.42217
Ld1S_130072300	Complex 1 protein (LYR family), putative	13	514.369	460.257	241	212	0.412155	0.523621
Ld1S_130072400	hypothetical protein	13	1089.25	982.681	506	662	0.607756	0.514918
Ld1S_130072500	hypothetical protein	13	1205.7	1062.3	71	155	0.128556	0.0668362
Ld1S_130072600	vacuolar protein sorting 51 homolog (S. cerevisiae). Intracellular trafficking, secretion, and vesicular transport	13	1439.5	1243.35	1688	2175	1.51094	1.35762
Ld1S_130072700	hypothetical protein	13	3717.03	3445.38	1485	1614	0.434218	0.431012
Ld1S_130072800	AAA domain/Dpy-30 motif containing protein, putative	13	3060.54	2785.54	1465	1375	0.449267	0.525931
Ld1S_130072900	hypothetical protein	13	2044.64	1966.45	2032	2825	1.38166	1.03333
Ld1S_130073000	Sin-like protein conserved region, putative	13	1763.16	1734.14	1402	1290	0.731641	0.808468
Ld1S_130073100	endomembrane protein, putative	13	1616.46	1572.73	1934	2064	1.27687	1.22971
Ld1S_130073200	Beta-lactamase superfamily domain containing protein, putative	13	1007.65	1024.13	455	500	0.496204	0.444281
Ld1S_130073300	hypothetical protein	13	1865.85	1894.47	631	632	0.33872	0.333075
Ld1S_130073400	hypothetical protein	13	3737.2	3655.88	541	965	0.258215	0.147981
Ld1S_130073500	hypothetical protein	13	802.269	683.841	542	526	0.65564	0.792581
Ld1S_130073600	hypothetical protein	13	308.988	255.214	163	214	0.692583	0.638681
Ld1S_130073700	Leucine Rich repeats (2 copies), putative	13	1716.4	1483.29	931	1066	0.621068	0.627658
Ld1S_130073800	hypothetical protein	13	3233.83	3203.26	1164	1086	0.335824	0.36338
Ld1S_130073900	EF hand-like protein	13	607.891	618.402	268	293	0.481994	0.433375
Ld1S_130074000	programmed cell death 6 protein-like protein	13	710.581	621.674	755	617	0.868303	1.21446
Ld1S_130074100	SPRY domain/HECT-domain (ubiquitin-transferase), putative	13	14417	13901.5	4650	4198	0.291184	0.334496
Ld1S_130074200	Ran-binding protein 1, putative	13	526.289	475.526	1862	2359	4.48233	3.91566
Ld1S_130074300	DNA crosslink repair. Replication, recombination and repair	13	1954.79	1885.74	806	739	0.378046	0.427417
Ld1S_130074400	PIN domain containing protein, putative	13	2685.54	2565.22	1127	1082	0.402899	0.439338
Ld1S_130074500	phosphoprotein phosphatase-like protein (fragment);phosphoprotein phosphatase, putative (fragment)	13	1212.11	1160.46	364	449	0.370427	0.313669
Ld1S_130074600	hypothetical protein	13	455.689	462.438	484	667	1.46372	1.04663
Ld1S_130074700	ATPase family associated with various cellular activities (AAA), putative	13	2294.95	2269.66	1647	1622	0.70677	0.725661
Ld1S_130074800	Miltefosine transporter	13	2757.06	2787.72	1424	1439	0.521934	0.510812
Ld1S_130074900	hypothetical protein	13	1227.7	1337.14	1448	1878	1.52969	1.0829
Ld1S_130075000	hypothetical protein	13	3043.12	3092.01	1074	955	0.313822	0.347347
Ld1S_130075100	ras-like small GTPases, putative	13	1019.57	1009.95	1363	1457	1.42903	1.34958
Ld1S_130075200	phosphoprotein phosphatase-like protein (fragment);phosphoprotein phosphatase, putative (fragment)	13	1505.52	1552	112	142	0.0943198	0.0721648
Ld1S_130075300	ubiquitin-conjugating enzyme, putative	13	422.681	418.812	867	1031	2.43919	2.07014
Ld1S_130075400	Spindle assembly abnormal 4	13	2099.65	2013.35	1197	1218	0.580096	0.594531
Ld1S_130075500	hypothetical protein	13	3057.79	3178.17	1167	1066	0.348618	0.367192
Ld1S_130075600	Kinesin-13 5, putative	13	1798	1803.95	1638	1604	0.892102	0.90801
Ld1S_130075700	squalene monooxygenase-like protein	13	1480.76	1432.03	1280	1230	0.830654	0.893835
Ld1S_130075800	mitochondrial DNA polymerase I protein D, putative	13	3758.29	3927.45	2573	2330	0.619963	0.655132
Ld1S_130075900	mitogen-activated protein kinase 7, putative	13	1503.68	1529.1	939	1101	0.732203	0.614087
Ld1S_130076000	dynein heavy chain (pseudogene), putative;Inner arm dynein 5-1;dynein heavy chain, putative;dynein heavy chain, cytosolic, putative	13	11062.1	11689.7	7897	10528	0.951714	0.675555
Ld1S_130076100	chaperonin TCP20, putative	13	1439.5	1530.19	3019	2908	2.02015	1.97296
Ld1S_130076200	60S ribosomal protein L44;60S ribosomal protein L44, putative	13	353.915	376.276	12932	14687	41.4986	34.3684
Ld1S_130076300	pyrroline-5-carboxylate reductase	13	754.592	795.088	5838	7231	9.58267	7.34258
Ld1S_130076400	Protein Associated with Differentiation, putative;major facilitator superfamily, putative	13	1394.57	1483.29	562	1323	0.948677	0.378887
Ld1S_130076500	Leucine-rich repeat protein. Function unknown	13	1170.85	1256.44	511	469	0.400562	0.406706
Ld1S_140076600	exosome complex exonuclease, putative	14	940.718	933.602	759	943	1.00243	0.812981
Ld1S_140076700	phosphatidylinositol 3-kinase 2, putative	14	2552.59	2793.17	1431	2021	0.791744	0.512321
Ld1S_140076800	hypothetical protein	14	709.665	756.915	902	940	1.32457	1.19168
Ld1S_140076900	J Biosynthesis Protein 2	14	2429.73	2542.32	1463	1256	0.51693	0.575459
Ld1S_140077000	hypothetical protein	14	1780.58	2038.44	746	757	0.425142	0.365967
Ld1S_140077100	ADP-ribosylation factor family, putative	14	595.972	655.484	554	561	0.94132	0.845177
Ld1S_140077200	DHHC palmitoyltransferase, putative	14	777.514	813.629	374	392	0.504171	0.459669
Ld1S_140077300	hypothetical protein	14	852.698	821.264	863	921	1.0801	1.05082
Ld1S_140077400	DnaJ domain containing protein, putative	14	1082.83	1240.08	785	888	0.82007	0.633026
Ld1S_140077500	hypothetical protein	14	2694.71	2725.55	1110	1107	0.410805	0.407257
Ld1S_140077600	DnaJ domain containing protein, putative	14	1467.01	1596.72	1091	1241	0.84594	0.683276
Ld1S_140077700	hypothetical protein	14	1052.58	1156.1	393	376	0.357218	0.339937
Ld1S_140077800	nucleoside hydrolase-like protein	14	926.048	1055.76	1357	1418	1.53124	1.28534
Ld1S_140077900	histone acetyltransferase, putative	14	1594.45	1644.71	1053	1163	0.729404	0.640235
Ld1S_140078000	60S ribosomal protein, putative	14	611.559	618.402	961	918	1.50108	1.55401
Ld1S_140078100	hypothetical protein	14	1044.33	1078.66	502	545	0.521868	0.465393
Ld1S_140078200	hypothetical protein	14	1984.13	2020.99	508	524	0.264096	0.251362
Ld1S_140078300	carboxypeptidase, putative;metallo-peptidase, Clan MA(E) Family M32	14	1347.81	1326.24	3077	5451	4.04433	2.3201
Ld1S_140078400	Thioredoxin-like, putative	14	574.883	639.124	5071	5880	10.2282	7.93429
Ld1S_140078500	Bardet-Biedl syndrome 18 protein	14	602.39	606.405	251	230	0.381813	0.413915
Ld1S_140078600	Domain of unknown function (DUF4201), putative	14	1325.81	1334.96	1025	1408	1.06199	0.767812
Ld1S_140078700	PX domain containing protein, putative	14	1396.41	1449.48	452	355	0.254224	0.311836
Ld1S_140078800	hypothetical protein	14	409.845	435.172	89	85	0.207395	0.204517
Ld1S_140078900	hypothetical protein	14	4967.65	5007.2	1664	1525	0.306986	0.332321
Ld1S_140079000	HIT domain containing protein, putative	14	464.858	405.724	624	790	1.69944	1.53799
Ld1S_140079100	hypothetical protein	14	541.876	555.144	1158	1510	2.78662	2.08595
Ld1S_140079200	von Willebrand factor type A domain containing protein, putative	14	2124.41	1998.08	832	714	0.336093	0.416399
Ld1S_140079300	hypothetical protein	14	1340.48	1507.29	398	371	0.276767	0.264051
Ld1S_140079400	Nucleus and spindle associated protein 3, putative	14	2671.79	2567.4	1738	1424	0.532977	0.676948
Ld1S_140079500	NAD dependent epimerase dehydratase family protein. Carbohydrate transport and metabolism;Cell wall/membrane/envelope biogenesis	14	763.76	785.272	1283	1806	2.36462	1.63383
Ld1S_140079600	hypothetical protein	14	801.353	739.465	317	340	0.424283	0.428688
Ld1S_140079700	proteasome alpha 3 subunit, putative	14	820.607	848.53	1458	2085	2.5408	1.71826
Ld1S_140079800	Polyamine transporter 1, putative	14	2168.42	2195.49	1728	2277	1.05007	0.787068
Ld1S_140079900	transmembrane amino acid transporter protein, putative	14	1908.03	1926.1	285	312	0.16352	0.147968
Ld1S_140080000	inositol polyphosphate kinase-like protein, putative	14	3106.39	2987.31	773	790	0.254315	0.258761
Ld1S_140080100	threonine synthase, putative	14	1957.54	2029.71	704	689	0.351973	0.346847
Ld1S_140080200	bromodomain containing. Transcription	14	2592.02	2673.2	1321	1474	0.568669	0.494165
Ld1S_140080300	hypothetical protein	14	7458.81	6902.76	1915	2236	0.29978	0.277425
Ld1S_140080400	Plasma-membrane choline transporter, putative	14	1754.91	1682.88	811	1084	0.617697	0.481911
Ld1S_140080700	hypothetical protein	14	885.705	795.088	786	875	0.987913	0.988569
Ld1S_140080800	hypothetical protein	14	597.805	606.405	440	588	0.983598	0.725588
Ld1S_140080900	Protein of unknown function (DUF1253), putative	14	3077.05	3034.21	1513	1297	0.421508	0.498648
Ld1S_140081000	Iguana/Dzip1-like DAZ-interacting protein N-terminal, putative	14	2227.1	1962.09	508	482	0.216425	0.258908
Ld1S_140081100	mRNA capping enzyme, beta chain, putative	14	1253.37	1179	432	505	0.402912	0.366412
Ld1S_140081200	pyridine nucleotide-disulphide oxidoreductase, putative	14	1453.25	1349.14	480	425	0.292447	0.355782
Ld1S_140081300	hypothetical protein	14	521.704	496.249	179	226	0.433196	0.360706
Ld1S_140081400	N-terminal conserved domain of Nudc./CS domain containing protein, putative	14	1043.41	951.052	3705	3575	3.42627	3.89569
Ld1S_140081500	cystathionine beta-lyase-like protein	14	1149.77	1044.85	834	1004	0.873221	0.798202
Ld1S_140081600	UDP-glucoronosyl and UDP-glucosyl transferase, putative	14	904.96	894.338	148	170	0.187854	0.165486
Ld1S_140081700	Amastin surface glycoprotein, putative	14	826.108	780.91	94	135	0.163417	0.120372
Ld1S_140081800	amastin-like surface protein-like protein. Function unknown	14	849.947	773.275	638	979	1.15184	0.825062
Ld1S_140081900	serine threonine kinase 10. Signal transduction mechanisms	14	1456.92	1486.56	884	758	0.520275	0.59466
Ld1S_140082000	stearic acid desaturase, putative;fatty-acid desaturase, putative	14	1261.63	1175.73	120	173	0.137125	0.102064
Ld1S_140082100	hypothetical protein	14	389.674	359.917	399	369	0.946946	1.10859
Ld1S_140082200	Ion channel, putative	14	1464.26	1330.6	1165	1237	0.844797	0.875545
Ld1S_140082300	ion transport protein-like protein	14	1275.38	1258.62	1333	1593	1.24904	1.0591
Ld1S_140082400	hypothetical protein	14	1427.58	1266.25	244	289	0.20244	0.192695
Ld1S_140082500	hypothetical protein	14	1298.3	1213.9	159	208	0.160209	0.130983
Ld1S_140082600	hypothetical protein	14	734.42	771.094	519	661	0.90003	0.67307
Ld1S_140082700	WD domain, G-beta repeat, putative	14	3189.82	2916.41	1879	1328	0.416324	0.644284
Ld1S_140082800	hypothetical protein	14	440.102	407.905	538	607	1.37923	1.31893
Ld1S_140082900	hypothetical protein	14	3538.24	3442.11	1420	1590	0.449376	0.412538
Ld1S_140083000	Methylates the ribose at the nucleotide 34 wobble position in the two leucyl isoacceptors tRNA(Leu)(CmAA) and tRNA(Leu)(cmnm5UmAA). Catalyzes the methyl transfer from S- adenosyl-L-methionine to the 2'-OH of the wobble nucleotide (By similarity). Translat	14	1271.71	1279.34	852	800	0.629073	0.665969
Ld1S_140083100	hypothetical protein	14	1305.64	1274.98	703	591	0.452653	0.551383
Ld1S_140083200	transporter. Inorganic ion transport and metabolism	14	1692.56	1633.8	719	682	0.40294	0.440078
Ld1S_140083300	LSD1 zinc finger, putative	14	791.267	687.113	645	792	1.00093	0.93871
Ld1S_140083400	fatty acid elongase, putative	14	783.015	821.264	207	261	0.333327	0.25205
Ld1S_140083500	fatty acid elongase, putative	14	777.514	880.159	2728	2762	3.55235	3.09944
Ld1S_140083600	fatty acid elongase, putative	14	758.259	773.275	3287	3247	4.28218	4.25075
Ld1S_140083700	fatty acid elongase, putative	14	741.755	784.182	1962	2542	3.42701	2.50197
Ld1S_140083800	fatty acid elongase, putative	14	805.02	882.341	3908	3188	3.96015	4.42913
Ld1S_140083900	fatty acid elongase, putative	14	842.612	766.731	34	92	0.109184	0.0443441
Ld1S_140084000	fatty acid elongase, putative	14	848.113	699.111	707	769	0.906718	1.01128
Ld1S_140084100	fatty acid elongase, putative	14	924.214	808.176	799	840	0.90888	0.988646
Ld1S_140084200	fatty acid elongase, putative	14	969.141	837.624	393	452	0.466392	0.469184
Ld1S_140084300	fatty acid elongase, putative	14	882.038	874.706	631	698	0.791349	0.721385
Ld1S_140084400	fatty acid elongase, putative;fatty acid elongase, puatative	14	1095.67	1060.12	73	138	0.12595	0.0688603
Ld1S_140084500	fatty acid elongase, putative	14	1001.23	948.871	85	165	0.164797	0.0895802
Ld1S_140084600	fatty acid elongase, putative;fatty acid elongase, puatative	14	1058.08	978.318	159	278	0.26274	0.162524
Ld1S_140084700	fatty acid elongase, putative	14	794.017	813.629	896	975	1.22793	1.10124
Ld1S_140084800	hypothetical protein	14	4925.48	4838.15	1334	996	0.202214	0.275725
Ld1S_140084900	guanine nucleotide-binding protein-like protein	14	1244.21	1164.82	1202	1154	0.9275	1.03192
Ld1S_140085000	hypothetical protein	14	1117.68	961.959	766	1074	0.960923	0.796292
Ld1S_140085100	ribosomal protein L21, putative	14	634.48	616.221	643	677	1.06701	1.04346
Ld1S_140085200	kinesin K39. Cytoskeleton	14	10876	10206.4	3868	4302	0.395549	0.378979
Ld1S_140085300	hypothetical protein	14	1174.52	1292.43	1225	925	0.787554	0.947829
Ld1S_140085400	kinesin, putative	14	3360.36	3148.72	1372	1350	0.401742	0.435732
Ld1S_140085500	Domain of unknown function (DUF4201), putative	14	1491.76	1520.37	1176	1246	0.835254	0.773494
Ld1S_140085600	protein kinase, putative	14	2579.18	2335.09	688	682	0.264425	0.294635
Ld1S_140085700	SNF2 family helicase-like protein, putative	14	3018.37	3071.29	2924	3322	1.1006	0.952044
Ld1S_140085800	calpain-like cysteine peptidase, putative	14	373.17	391.546	374	405	1.0853	0.955189
Ld1S_140085900	calpain-like cysteine peptidase, putative	14	342.913	295.568	693	1077	3.14074	2.34464
Ld1S_140086000	hypothetical protein	14	450.188	483.161	200	248	0.550881	0.413941
Ld1S_140086100	hypothetical protein	14	1388.16	1360.05	573	696	0.501385	0.421309
Ld1S_140086200	hypothetical protein	14	2810.24	2804.08	937	975	0.346946	0.334156
Ld1S_140086300	hypothetical protein	14	1635.71	1641.44	1004	939	0.574062	0.611659
Ld1S_140086400	protein phosphatase 2C-like protein	14	2529.67	2292.56	761	810	0.3202	0.331943
Ld1S_140086500	hypothetical protein	14	263.144	272.664	410	459	1.74429	1.50368
Ld1S_140086600	glutathione synthetase, putative	14	1643.96	1635.98	8458	7549	4.59195	5.16998
Ld1S_140086700	mitochondrial DNA polymerase I protein C	14	4017.77	3806.39	2062	1936	0.48186	0.541721
Ld1S_140086800	immunodominant antigen, putative	14	2326.12	2126.78	1861	1543	0.663336	0.875032
Ld1S_140086900	hypothetical protein	14	2201.43	2115.87	1420	1071	0.486503	0.671118
Ld1S_140087000	Ribosomal protein L16p/L10e, putative	14	507.951	491.886	497	634	1.24815	1.0104
Ld1S_140087100	RNA editing 3' terminal uridylyl transferase 1	14	2900.09	2816.07	1465	1296	0.446883	0.520228
Ld1S_140087200	Phosphoribulokinase uridine kinase family protein. Nucleotide transport and metabolism;Coenzyme transport and metabolism	14	933.383	829.989	757	524	0.561399	0.91206
Ld1S_140087300	sodium/hydrogen exchanger, putative	14	1694.39	1623.99	663	604	0.35647	0.408255
Ld1S_140087400	ADP/ATP mitochondrial carrier-like protein	14	1053.49	992.497	899	819	0.777413	0.905796
Ld1S_140087500	ADP ATP mitochondrial carrier-like protein. Energy production and conversion	14	1124.09	996.86	551	526	0.467932	0.552736
Ld1S_140087600	hypothetical protein	14	2817.57	2712.46	965	812	0.288192	0.355765
Ld1S_140087700	hypothetical protein	14	838.945	850.712	821	869	1.03583	0.965074
Ld1S_140087800	hypothetical protein	14	1293.72	1315.33	1559	1851	1.43076	1.18525
Ld1S_140087900	Domain of unknown function (DUF202), putative	14	533.624	566.051	1177	1250	2.34247	2.07932
Ld1S_140088000	hypothetical protein	14	605.14	576.957	774	1015	1.6773	1.34152
Ld1S_140088100	COQ9, putative	14	793.101	739.465	585	905	1.14109	0.791113
Ld1S_140088200	dynein heavy chain (pseudogene), putative;Inner arm dynein 5-1;dynein heavy chain, putative;dynein heavy chain, cytosolic, putative	14	10749.5	10223.8	3116	3324	0.309224	0.304779
Ld1S_140088300	protein kinase, putative	14	2633.28	2459.43	747	772	0.293171	0.303729
Ld1S_140088400	hypothetical protein	14	1094.75	1223.72	643	685	0.625711	0.525449
Ld1S_140088500	PQ loop repeat, putative	14	696.828	678.388	601	733	1.05191	0.885924
Ld1S_140088600	hypothetical protein	14	404.344	434.081	178	217	0.536672	0.410062
Ld1S_140088700	hypothetical protein	14	1136.01	1199.72	473	474	0.417249	0.394258
Ld1S_140088800	hypothetical protein	14	1015.9	967.412	451	581	0.571905	0.466192
Ld1S_140088900	kinesin K39, putative (fragment)	14	8680.1	8296.62	2012	2466	0.284098	0.242508
Ld1S_140089000	kinesin K39, putative (fragment)	14	7460.65	7428.46	826	1131	0.151595	0.111194
Ld1S_140089100	kinesin K39, putative (fragment)	14	17568.3	17310.9	1312	1786	0.10166	0.0757904
Ld1S_140089200	hypothetical protein	14	2363.71	2372.18	931	708	0.299529	0.392467
Ld1S_140089300	'Cold-shock' DNA-binding domain containing protein, putative	14	1328.56	1195.36	681	581	0.437316	0.569703
Ld1S_140089400	tub family protein-like protein	14	889.373	935.783	257	300	0.337316	0.274636
Ld1S_140089500	hypothetical protein	14	1005.82	973.956	768	1128	1.12148	0.788537
Ld1S_140089600	enolase	14	1266.21	1234.62	7186	9549	7.5414	5.8204
Ld1S_140089700	ras-like small GTPases, putative	14	1875.94	2012.26	515	455	0.242546	0.255931
Ld1S_140089800	poly(A) polymerase, putative	14	1766.83	1885.74	1161	1105	0.625415	0.615672
Ld1S_140089900	Bifunctional NAD(P)H-hydrate repair enzyme	14	1497.26	1597.81	1244	1541	1.02921	0.778565
Ld1S_140090000	phosphatidylserine synthase, putative	14	1378.07	1364.41	1093	842	0.611	0.801078
Ld1S_140090100	NLI interacting factor-like phosphatase, putative	14	739.005	772.185	488	474	0.641403	0.631973
Ld1S_140090200	hypothetical protein	14	2467.32	2323.1	1717	1984	0.804111	0.739099
Ld1S_140090300	hypothetical protein	14	1570.61	1477.84	809	985	0.627143	0.547421
Ld1S_140090400	hypothetical protein	14	943.469	844.168	658	722	0.765261	0.779466
Ld1S_140090500	hypothetical protein	14	556.546	608.586	1088	1241	2.22983	1.78775
Ld1S_140090600	hypothetical protein	14	497.865	499.52	516	610	1.22523	1.03299
Ld1S_140090700	ubiquitin/ribosomal protein S27a, putative	14	473.11	462.438	5960	8413	17.7823	12.8882
Ld1S_140090800	NADP oxidoreductase coenzyme F420-dependent, putative	14	1551.36	1516.01	517	588	0.379022	0.341026
Ld1S_140090900	hypothetical protein	14	2188.59	2298.01	333	460	0.210181	0.144908
Ld1S_140091000	protein kinase, putative	14	2790.06	2825.89	1154	1312	0.47024	0.408367
Ld1S_140091100	hypothetical protein	14	1012.23	930.33	406	401	0.396153	0.436404
Ld1S_140091200	serine hydroxymethyltranferase (SHMT-S);serine hydroxymethyltransferase (SHMT-L)	14	1249.71	1305.52	1822	2275	1.82043	1.39562
Ld1S_140091300	DnaJ domain containing protein, putative	14	1618.29	1472.39	1416	1735	1.07212	0.961705
Ld1S_140091400	delta-6 fatty acid desaturase, putative	14	1149.77	1119.01	1279	1035	0.900183	1.14297
Ld1S_140091500	hypothetical protein	14	1623.79	1555.28	797	750	0.461881	0.512449
Ld1S_140091600	myo-inositol-1-phosphate synthase	14	1321.22	1524.74	3703	3282	2.48406	2.42862
Ld1S_140091700	tyrosyl-tRNA synthetase, putative	14	1768.66	1585.81	1525	1063	0.60102	0.961651
Ld1S_140091800	hypothetical protein	14	908.627	955.415	572	661	0.727471	0.598693
Ld1S_140091900	emp24/gp25L/p24 family/GOLD, putative	14	639.065	696.929	1052	1450	2.26894	1.50948
Ld1S_140092000	hypothetical protein	14	437.351	377.367	897	871	1.99153	2.377
Ld1S_140092100	phosphoglycan beta 1,3 galactosyltransferase, putative	14	2646.11	2708.1	1159	1217	0.45992	0.427975
Ld1S_140092200	protein kinase, putative	14	1457.84	1392.77	553	522	0.358064	0.397051
Ld1S_140092300	hypothetical protein	14	1794.33	1901.01	503	455	0.253576	0.264596
Ld1S_140092400	WD40. Function unknown	14	4371.68	4411.7	2504	2755	0.630192	0.567581
Ld1S_140092500	cytoskeleton associated protein, putative	14	2510.42	2554.32	3710	4216	1.6794	1.45244
Ld1S_140092600	Vacuolar 14 Fab1-binding region/Vacuolar protein 14 C-terminal Fig4p binding, putative	14	1748.49	1701.42	918	999	0.571351	0.539548
Ld1S_140092700	Mitochondrial pyruvate carrier 2	14	424.515	423.175	807	823	1.93868	1.90701
Ld1S_140092800	hypothetical protein	14	1305.64	1350.23	1178	1269	0.97194	0.872443
Ld1S_140092900	glutathione-S-transferase/glutaredoxin,putative	14	853.615	896.519	1668	1378	1.61431	1.86053
Ld1S_140093000	synaptojanin (N-terminal domain), putative	14	2249.1	2197.67	1145	999	0.444177	0.521006
Ld1S_150093100	histone H4	15	486.863	616.221	8502	9881	20.2952	13.797
Ld1S_150093200	hypothetical protein	15	1697.14	2052.61	870	841	0.495538	0.42385
Ld1S_150093300	ATP diphosphohydrolase	15	1257.96	1425.49	853	784	0.623232	0.598392
Ld1S_150093400	Possible lysine decarboxylase, putative	15	973.726	1093.93	2300	2107	2.16385	2.10251
Ld1S_150093500	cytochrome-b5 reductase, putative	15	880.204	858.346	990	910	1.03385	1.15338
Ld1S_150093600	Eukaryotic translation initiation factor 4 gamma 1	15	2800.15	3194.53	1122	1280	0.457118	0.351225
Ld1S_150093700	hypothetical protein	15	1527.52	1698.15	606	580	0.3797	0.356859
Ld1S_150093800	hypothetical protein	15	1052.58	1119.01	696	669	0.635583	0.621977
Ld1S_150093900	ATP-dependent protease ATPase subunit HslU1, putative	15	1506.43	1538.92	1401	1288	0.855	0.910381
Ld1S_150094000	Flavin-binding monooxygenase-like, putative	15	1654.05	1952.27	746	636	0.384511	0.382118
Ld1S_150094100	hypothetical protein	15	2449.9	2525.96	1006	961	0.392261	0.398265
Ld1S_150094200	mitochondrial carrier protein, putative	15	937.968	1137.55	688	752	0.801734	0.604806
Ld1S_150094300	ATP-dependent RNA helicase, putative	15	2038.22	2205.31	429	298	0.146206	0.194531
Ld1S_150094400	zinc finger (CCCH type) protein, putative	15	728.919	797.27	67	112	0.153652	0.0840368
Ld1S_150094500	WD40. Function unknown	15	684.909	740.555	335	432	0.630741	0.452363
Ld1S_150094600	zinc finger (CCCH type) protein, putative	15	2541.59	2684.1	1092	923	0.363159	0.40684
Ld1S_150094700	protein phosphatase 2C, putative	15	1356.06	1313.15	2886	2869	2.11568	2.19777
Ld1S_150094800	serine/threonine-protein kinase, putative	15	2116.16	2401.62	1648	1619	0.765066	0.686202
Ld1S_150094900	hypothetical protein	15	2069.4	2142.05	690	742	0.358559	0.322122
Ld1S_150095000	cytochrome b5-like Heme/Steroid binding domain containing protein, putative	15	622.561	640.215	509	614	0.986249	0.795045
Ld1S_150095100	hypothetical protein	15	1012.23	1074.3	509	481	0.475186	0.473799
Ld1S_150095200	60S ribosomal protein L13a, putative (fragment)	15	875.62	825.627	2720	3138	3.58375	3.29447
Ld1S_150095300	hypothetical protein	15	1538.52	1630.53	1158	1093	0.710421	0.710198
Ld1S_150095400	protein phosphatase 1 catalitic subunit, putative	15	1069.08	1280.43	725	762	0.712762	0.566216
Ld1S_150095500	hypothetical protein	15	704.163	680.569	726	832	1.18154	1.06675
Ld1S_150095600	WD domain, G-beta repeat, putative	15	1120.43	1183.36	183	155	0.13834	0.154644
Ld1S_150095700	lysyl-tRNA synthetase, putative	15	1638.46	1724.33	4152	3800	2.31925	2.4079
Ld1S_150095800	nonspecific lipid-transfer protein, putative	15	1317.56	1357.87	867	962	0.73014	0.638502
Ld1S_150095900	hypothetical protein	15	5887.28	5926.63	2205	2088	0.354663	0.37205
Ld1S_150096000	hypothetical protein	15	1643.05	1671.98	1035	977	0.594627	0.619028
Ld1S_150096100	replication Factor A 28 kDa subunit, putative	15	725.252	756.915	1185	1430	1.97173	1.56556
Ld1S_150096200	ribonucleoprotein p18, mitochondrial precursor, putative	15	617.06	672.935	1275	1339	2.16997	1.89469
Ld1S_150096300	ribonucleoprotein p18, mitochondrial precursor, putative	15	628.062	639.124	515	531	0.845457	0.80579
Ld1S_150096400	hypothetical protein	15	2505.83	2521.6	985	708	0.282541	0.390625
Ld1S_150096500	Ecotin-like protein	15	508.868	590.045	904	895	1.75881	1.53209
Ld1S_150096600	CTD (Carboxy-terminal domain, RNA polymerase II, polypeptide A) small. Transcription	15	1859.43	1965.36	997	961	0.516825	0.507286
Ld1S_150096700	alpha/beta hydrolase fold, putative;Isoprenylcysteine alpha-carbonyl methylesterase, putative	15	2399.47	2449.61	2219	3421	1.42573	0.905857
Ld1S_150096800	alpha/beta hydrolase fold, putative;Isoprenylcysteine alpha-carbonyl methylesterase, putative	15	3088.97	3225.07	931	858	0.277763	0.288676
Ld1S_150096900	hypothetical protein	15	1498.18	1573.82	1251	1416	0.945146	0.794883
Ld1S_150097000	hypothetical protein	15	2094.15	1957.73	1410	1717	0.819902	0.720223
Ld1S_150097100	RNA pseudouridylate synthase, putative	15	3365.86	3351.59	959	838	0.24897	0.286133
Ld1S_150097200	60S acidic ribosomal protein, putative;60S acidic ribosomal protein, putative (fragment)	15	469.442	458.076	710	751	1.59977	1.54996
Ld1S_150097300	60S acidic ribosomal protein, putative;60S acidic ribosomal protein, putative (fragment)	15	506.117	510.427	560	614	1.21316	1.09712
Ld1S_150097400	cytoplasmic l-asparaginase i-like protein	15	1239.62	1317.51	684	874	0.705054	0.51916
Ld1S_150097500	hypothetical protein	15	2144.58	2075.52	732	787	0.366971	0.352683
Ld1S_150097600	hypothetical protein	15	1949.29	2217.3	1227	1023	0.524808	0.553375
Ld1S_150097700	hypothetical protein	15	684.909	591.136	431	362	0.528537	0.729105
Ld1S_150097800	5'-3' exonuclease. RNA processing and modification	15	1145.18	1107.02	461	348	0.303882	0.416435
Ld1S_150098700	tb-292 membrane associated protein-like protein	15	37753.4	38904.8	2	0	0	5.14075e-05
Ld1S_150098800	hypothetical protein	15	2345.38	2381.99	812	642	0.27373	0.340891
Ld1S_150098900	Fidgetin, putative	15	3051.37	3123.64	1053	1113	0.364754	0.337107
Ld1S_150099000	ecotin, putative	15	674.823	718.742	550	876	1.29812	0.765226
Ld1S_150099100	ecotin, putative	15	1240.54	1345.87	459	515	0.415143	0.341043
Ld1S_150099200	hypothetical protein	15	5737.83	5757.57	1352	1376	0.239812	0.234821
Ld1S_150099300	Coiled-coil domain containing 151. Function unknown	15	2148.25	2241.3	1317	1447	0.673572	0.587606
Ld1S_150099400	hypothetical protein	15	5316.98	5475.09	1173	985	0.185255	0.214243
Ld1S_150099500	hypothetical protein	15	1610.96	1619.62	588	520	0.32279	0.363047
Ld1S_150099600	hypothetical protein	15	1251.54	1250.98	364	477	0.38113	0.290971
Ld1S_150099700	signal peptidase subunit, putative	15	1073.67	1085.2	1077	1165	1.08507	0.992441
Ld1S_150099800	hypothetical protein	15	741.755	772.185	520	554	0.746877	0.673414
Ld1S_150099900	hypothetical protein	15	5356.41	5442.37	1343	1398	0.260996	0.246767
Ld1S_150100000	hypothetical protein	15	3745.45	3840.2	1202	1384	0.369515	0.313005
Ld1S_150100100	CRAL/TRIO domain containing protein, putative	15	1685.22	1576	1239	1531	0.908484	0.786168
Ld1S_150100200	hypothetical protein	15	1460.59	1481.11	497	553	0.378614	0.335559
Ld1S_150100300	hypothetical protein	15	3121.97	3004.76	1014	2370	0.759135	0.337465
Ld1S_150100400	Galactose oxidase, central domain/Kelch motif containing protein, putative	15	3731.7	3992.89	1223	1268	0.339792	0.306294
Ld1S_150100500	hypothetical protein	15	2170.25	2059.16	557	680	0.313327	0.270499
Ld1S_150100600	hypothetical protein	15	1502.77	1616.35	2506	2355	1.56711	1.5504
Ld1S_150100700	Rix1 complex component involved in 60S ribosome maturation, putative	15	3120.14	3142.18	669	537	0.172108	0.212909
Ld1S_150100800	hypothetical protein	15	753.675	737.284	863	825	1.09464	1.17051
Ld1S_150100900	alanyl-tRNA synthetase domain containing 1. Function unknown	15	1563.28	1715.6	1203	1038	0.663989	0.701212
Ld1S_150101000	hypothetical protein	15	3280.59	3279.6	1409	1238	0.377371	0.429625
Ld1S_150101100	hypothetical protein	15	9798.69	9611.95	1954	2217	0.226255	0.203289
Ld1S_150101200	flavoprotein monooxygenase, putative	15	2139.08	2037.35	776	793	0.37072	0.380888
Ld1S_150101300	Putative methyltransferase, putative	15	1529.35	1493.11	542	575	0.375976	0.363001
Ld1S_150101400	hypothetical protein	15	357.583	356.645	314	406	1.1354	0.880428
Ld1S_150101500	Protein of unknown function (DUF2871), putative	15	704.163	724.196	1679	2322	3.29753	2.31843
Ld1S_150101600	tRNA-Asp	15	77.9347	80.7085	19	34	0.436262	0.235415
Ld1S_150101800	5S(MS) ribosomal RNA	15	157.703	167.961	85	104	0.659466	0.50607
Ld1S_150101900	hypothetical protein	15	1785.16	1871.57	237	370	0.207264	0.126632
Ld1S_150102000	ATP-binding cassette protein subfamily A, member 9, putative;ATP-binding cassette protein subfamily A, member 6, putative;ATP-binding cassette protein subfamily A, member 3, putative (fragment);ATP-binding cassette protein subfamily A, member 7, putative;	15	7814.56	7777.47	2654	3613	0.462342	0.341242
Ld1S_150102100	protein kinase, putative	15	1947.45	2048.25	2157	2159	1.10863	1.05309
Ld1S_150102200	hypothetical protein	15	1224.03	1112.47	424	482	0.39378	0.381134
Ld1S_150102300	hypothetical protein	15	2130.83	2186.77	1455	1143	0.536411	0.665366
Ld1S_150102400	hypothetical protein	15	7261.68	7069.63	1792	1738	0.239338	0.253479
Ld1S_150102500	hypothetical protein	15	6517.18	6527.58	2545	2124	0.325908	0.389884
Ld1S_150102600	peroxisomal membrane protein (Pex16), putative	15	1854.85	1889.02	1376	1110	0.598432	0.728421
Ld1S_150102700	dolichol phosphate-mannose biosynthesis regulatory protein (DPM2), putative	15	458.44	429.718	335	334	0.728558	0.77958
Ld1S_150102800	GDP dissociation inhibitor, putative	15	3165.07	3376.67	1548	1394	0.440433	0.45844
Ld1S_150102900	hypothetical protein	15	1399.16	1498.56	581	704	0.50316	0.387705
Ld1S_150103000	hypothetical protein	15	2504.91	2463.79	608	697	0.278253	0.246774
Ld1S_150103100	hypothetical protein	15	3167.82	3251.25	1065	1268	0.400276	0.327567
Ld1S_150103200	Adaptor-related protein complex 3 beta. Intracellular trafficking, secretion, and vesicular transport	15	1062.66	1069.93	518	593	0.558032	0.484142
Ld1S_150103300	Sugar (and other) transporter, putative	15	2075.81	2128.96	763	694	0.334327	0.358391
Ld1S_150103400	myo-inositol-1 phosphatase, putative	15	1521.1	1650.16	413	353	0.232068	0.250278
Ld1S_150103500	ATP-binding cassette protein subfamily G, member 4, putative	15	2347.21	2277.29	1477	1329	0.566204	0.648578
Ld1S_150103600	hypothetical protein	15	1868.6	1812.67	601	517	0.276678	0.331555
Ld1S_150103700	hypothetical protein	15	7790.72	7790.56	2500	2353	0.302026	0.320901
Ld1S_150103800	protein phosphatase 2A regulatory subunit, putative	15	2525.09	2512.87	1106	1010	0.399986	0.440134
Ld1S_150103900	calmodulin-like protein	15	615.226	676.207	933	1266	2.05778	1.37976
Ld1S_150104000	Nucleus and spindle associated protein 2, putative	15	3637.26	3722.41	1418	1335	0.367035	0.380936
Ld1S_150104100	40S ribosomal protein S3, putative	15	836.194	855.074	5832	6933	8.29114	6.82046
Ld1S_150104200	ERV/ALR sulfhydryl oxidase domain-containing protein	15	1138.76	1013.22	400	358	0.314376	0.394781
Ld1S_150104300	NAD/FAD dependent dehydrogenase, putative	15	1346.9	1454.94	2185	3265	2.42409	1.50179
Ld1S_150104400	DNA repair protein Rad9, putative	15	2368.3	2292.56	876	730	0.308238	0.382106
Ld1S_150104500	succinate dehydrogenase, putative	15	740.838	655.484	1525	1672	2.2569	2.32652
Ld1S_150104600	60S ribosomal protein L6, putative (fragment)	15	704.163	622.765	2807	3146	4.46771	4.50732
Ld1S_150104700	glutamate dehydrogenase	15	3039.45	3026.57	9019	6862	2.25764	2.97994
Ld1S_150104800	solanesyl-diphosphate synthase, putative	15	1180.02	1167	1284	1018	0.862695	1.10026
Ld1S_150104900	SKIP/SNW domain containing protein, putative	15	1379.9	1295.7	1066	959	0.694976	0.822722
Ld1S_150105000	tryparedoxin peroxidase	15	705.997	756.915	231	352	0.498586	0.305186
Ld1S_150105100	developmentally regulated protein, putative	15	566.631	548.6	26	26	0.0458852	0.0473934
Ld1S_150105200	tryparedoxin peroxidase	15	680.324	731.83	1103	1794	2.63698	1.50718
Ld1S_150105300	developmentally regulated protein, putative	15	547.377	558.416	24	21	0.0383648	0.0429787
Ld1S_150105400	tryparedoxin peroxidase	15	718.833	708.926	1521	1547	2.1521	2.1455
Ld1S_150105500	TFIIB_C_1 domain-containing protein	15	1340.48	1415.67	1087	1023	0.763161	0.767833
Ld1S_150105600	hypothetical protein	15	9266.9	8874.67	3219	2897	0.312618	0.362718
Ld1S_150105700	cyclic nucleotide-binding domain containing protein, putative	15	3596	3704.96	2406	1596	0.443826	0.6494
Ld1S_150105800	protein kinase, putative	15	8049.28	8155.93	2978	2586	0.321271	0.365133
Ld1S_150105900	60S acidic ribosomal protein P2	15	481.362	458.076	3409	3792	7.87765	7.442
Ld1S_150106000	60S acidic ribosomal protein P2	15	484.112	552.963	316	341	0.704382	0.571467
Ld1S_150106100	inositol/phosphatidylinositol phosphatase, putative	15	2373.8	2269.66	911	665	0.280141	0.401383
Ld1S_150106200	DnaJ domain/DnaJ central domain containing protein, putative	15	1511.93	1397.13	695	622	0.411394	0.497448
Ld1S_150106300	nucleoside transporter 1, putative	15	1309.3	1411.31	68	94	0.0717939	0.0481822
Ld1S_150106400	nucleoside transporter 1, putative	15	1360.65	1356.78	11790	10677	7.84699	8.68972
Ld1S_150106500	E2-like ubiquitin-conjugation enzyme, putative	15	629.896	636.943	1068	1284	2.03843	1.67676
Ld1S_150106600	SET domain containing protein, putative	15	1367.07	1303.33	666	815	0.596167	0.510997
Ld1S_150106700	hypothetical protein	15	1651.3	1652.34	750	711	0.43057	0.453901
Ld1S_150106800	hypothetical protein	15	5457.27	5438.01	2164	1921	0.352008	0.39794
Ld1S_150106900	mitochondrial DNA topoisomerase II;DNA topoisomerase ii	15	3712.44	3732.23	2921	2968	0.799473	0.782643
Ld1S_150107000	ubiquitin hydrolase, putative	15	4124.12	4207.75	1905	1782	0.432092	0.452736
Ld1S_150107100	MGT1 magnesium transporter	15	2643.36	2596.85	1061	905	0.342367	0.408572
Ld1S_150107200	Eukaryotic translation initiation factor 4 gamma 2	15	4107.62	4410.61	3304	2688	0.654394	0.749102
Ld1S_150107300	actin-like protein, putative	15	1436.75	1389.5	1123	1151	0.801114	0.808207
Ld1S_150107400	hypothetical protein	15	1229.54	1267.34	466	370	0.300927	0.367699
Ld1S_150107500	hypothetical protein	15	1114.01	1205.17	408	391	0.350985	0.33854
Ld1S_150107600	hypothetical protein	15	1011.32	1019.76	483	428	0.42321	0.473639
Ld1S_150107700	Rab-GTPase-TBC domain containing protein, putative	15	2044.64	2238.03	814	702	0.343337	0.363713
Ld1S_150107800	2OG-Fe(II) oxygenase superfamily, putative	15	1046.16	1134.28	458	519	0.4961	0.40378
Ld1S_150107900	actin-related protein 3, putative arp3	15	1399.16	1352.41	538	593	0.423826	0.397807
Ld1S_150108000	Putative papain-like cysteine peptidase (DUF1796), putative	15	1201.11	1100.47	530	558	0.46457	0.481612
Ld1S_150108100	nucleolar RNA binding protein, putative	15	1360.65	1374.23	3117	2403	1.76607	2.26818
Ld1S_150108200	TMEM164 family, putative	15	930.633	904.154	873	755	0.811276	0.965544
Ld1S_150108300	hypothetical protein	15	989.313	981.59	1092	1169	1.18163	1.11248
Ld1S_150108400	ERAD-associated E3 ubiquitin-protein ligase HRD1, putative	15	1610.96	1675.25	1039	926	0.574814	0.620207
Ld1S_150108500	mismatch repair protein MSH3, putative	15	3285.18	3068.02	1369	1193	0.363146	0.446217
Ld1S_150108600	hypothetical protein	15	410.762	405.724	159	182	0.443079	0.391892
Ld1S_150108700	glutaminyl-tRNA synthetase, putative	15	1674.22	1713.42	2339	2077	1.24058	1.36511
Ld1S_150108800	proliferative cell nuclear antigen (PCNA), putative	15	922.381	1079.75	1976	2042	2.21384	1.83005
Ld1S_150108900	phosphomevalonate kinase-like protein	15	1465.17	1536.73	945	1036	0.707084	0.61494
Ld1S_150109000	hypothetical protein	15	539.125	533.331	544	540	1.00162	1.02
Ld1S_150109100	ribosomal protein S6, putative	15	556.546	599.861	2506	2174	3.90624	4.17764
Ld1S_150109200	cAMP specific phosphodiesterase, putative	15	2660.78	2732.09	946	1173	0.440848	0.346255
Ld1S_150109300	cAMP specific phosphodiesterase, putative	15	2720.38	3015.66	604	958	0.352157	0.200288
Ld1S_150109400	hypothetical protein	15	1851.18	1820.3	1690	1724	0.931298	0.928416
Ld1S_150109500	hypothetical protein	15	923.297	945.599	709	648	0.701832	0.749789
Ld1S_150109600	hypothetical protein	15	488.697	511.518	682	860	1.75978	1.33329
Ld1S_150109700	hypothetical protein	15	425.432	484.251	1973	3011	7.07751	4.07433
Ld1S_150109800	presenilin-like aspartic peptidase, putative	15	1147.02	1158.28	1024	890	0.775926	0.884072
Ld1S_150109900	Radical SAM superfamily/Wyosine base formation, putative	15	1347.81	1442.94	932	896	0.664781	0.645904
[truncated: 6,632 more rows]

## Sheet: b-RNAsig_RNAnorm_LPlogvsEPlog
Gene id	Product	Chr	DNAnorm_EP.1 log	DNAnorm_LP.1 log	DNA FC LP/EP	DNA log10 FC LP/EP	RNAnorm_LP.1 log	RNAnorm_EP.1 log	RNA FC LP/EP	RNA log10 FC LP/EP	pvalue	padj	EP.1log_RNAnormAbundance	LP.1log_RNAnormAbundance	ratioLP_RNAnormAbundance/EP_RNAnormAbundance
LD11Cs1H1_c1	snoRNA	11	159.537	162.508	1.01862	0.00801267	14	39	0.358974	-0.444937	4.41128e-05	0.000226465	0.244457	0.0861497	0.352412
LD11Cs2H1_c2	snoRNA	11	126.529	131.969	1.04299	0.0182819	267	429	0.622378	-0.205946	1.36447e-07	1.28123e-06	3.39052	2.0232	0.596722
LD14Cs1C2_c7	snoRNA	14	173.29	164.689	0.950366	-0.0221092	46	81	0.567901	-0.245727	0.000118589	0.000540321	0.467424	0.279314	0.597561
LD14Cs1H1_c4	snoRNA	14	179.708	158.145	0.88001	-0.0555124	28	59	0.474576	-0.323694	0.000123658	0.000559643	0.32831	0.177053	0.539285
LD14Cs1H2_c8	snoRNA	14	206.298	217.041	1.05207	0.0220462	37	94	0.393617	-0.404926	8.43002e-12	1.94466e-10	0.455652	0.170475	0.374134
LD14Cs1H3_c3	snoRNA	14	302.57	280.299	0.926392	-0.0332052	90	126	0.714286	-0.146128	0.00136472	0.00460443	0.416432	0.321086	0.77104
LD18Cs1C2_c64	snoRNA	18	205.381	226.856	1.10456	0.043191	40	69	0.57971	-0.236789	0.000616067	0.00230704	0.335961	0.176323	0.524832
Ld1S_010005100	Endonuclease/Exonuclease/phosphatase family, putative	1	1511.02	2320.92	1.536	0.18639	782	529	1.47826	0.169751	1.4467e-09	2.08785e-08	0.350095	0.336936	0.962412
Ld1S_010005200	Kinesin-13 1, putative	1	2013.47	2836.8	1.40891	0.148884	1392	969	1.43653	0.157315	6.442e-06	4.06744e-05	0.481259	0.490694	1.0196
Ld1S_010005600	BSD domain containing protein, putative	1	1688.89	2291.47	1.35679	0.132512	767	488	1.57172	0.196376	3.53342e-13	1.04563e-11	0.288947	0.33472	1.15841
Ld1S_010005700	hypothetical protein	1	727.085	1061.21	1.45954	0.164215	500	352	1.42045	0.152427	3.24055e-07	2.80327e-06	0.484125	0.471161	0.973222
Ld1S_010005900	Glycosyl transferase family 11, putative	1	1014.07	1417.85	1.39818	0.145564	309	187	1.65241	0.218117	5.83544e-09	7.40561e-08	0.184406	0.217935	1.18182
Ld1S_010006100	hypothetical protein	1	1865.85	2837.89	1.52096	0.182119	1141	821	1.38977	0.142942	8.2633e-08	8.15108e-07	0.440014	0.40206	0.913743
Ld1S_010006200	hypothetical protein	1	1147.93	1722.15	1.50021	0.176153	567	370	1.53243	0.185381	1.78649e-08	2.06055e-07	0.322318	0.32924	1.02148
Ld1S_010006400	hypothetical protein	1	414.429	639.124	1.54218	0.188135	326	178	1.83146	0.262798	1.6153e-12	4.18786e-11	0.429506	0.510073	1.18758
Ld1S_010006500	LSM domain containing protein, putative	1	310.822	447.169	1.43867	0.15796	290	195	1.48718	0.172363	2.50496e-05	0.000137343	0.627369	0.648524	1.03372
Ld1S_010006700	CLC-type chloride channel, putative	1	2228.93	3367.95	1.51101	0.179268	1913	1295	1.47722	0.169445	4.91158e-10	7.74091e-09	0.580995	0.568002	0.977636
Ld1S_010006800	hypothetical protein	1	743.589	1003.4	1.34941	0.130143	526	336	1.56548	0.194646	1.00898e-06	7.64477e-06	0.451862	0.524216	1.16012
Ld1S_010007000	CUE domain/Domain of unknown function (DUF1771)/Smr domain containing protein, putative	1	2412.31	3697.32	1.53269	0.185454	1463	957	1.52874	0.184332	5.89074e-10	9.17974e-09	0.396715	0.395692	0.99742
Ld1S_010007200	hypothetical protein	1	452.022	675.116	1.49355	0.174219	445	341	1.30499	0.115606	0.000137414	0.000615877	0.754389	0.659146	0.873748
Ld1S_010007300	DNA excision/repair protein SNF2, putative	1	2845.08	3855.47	1.35514	0.131983	1445	978	1.47751	0.169529	1.27654e-09	1.86371e-08	0.343752	0.374792	1.0903
Ld1S_010007400	Right handed beta helix region, putative	1	2355.46	3501.01	1.48633	0.172117	579	369	1.56911	0.195652	9.89558e-07	7.51056e-06	0.156657	0.165381	1.05569
Ld1S_010007500	Calmodulin-binding, putative	1	911.378	1248.8	1.37023	0.136795	754	593	1.2715	0.104317	0.000437156	0.00171986	0.650663	0.603779	0.927944
Ld1S_010007700	pseudouridylate synthase-like protein	1	1277.21	1826.85	1.43034	0.155439	1116	934	1.19486	0.0773173	0.00117459	0.00404048	0.73128	0.610888	0.835368
Ld1S_010008500	hypothetical protein	1	777.514	1081.93	1.39153	0.143491	695	528	1.31629	0.119351	2.52685e-05	0.000138371	0.679088	0.64237	0.945931
Ld1S_010008600	hypothetical protein	1	2244.52	2952.41	1.31538	0.119052	1380	1021	1.35162	0.130853	4.576e-08	4.85731e-07	0.454886	0.467415	1.02755
Ld1S_010008700	hypothetical protein	1	610.642	961.959	1.57532	0.19737	522	415	1.25783	0.0996224	0.000836169	0.00301192	0.679613	0.542643	0.798459
Ld1S_010008800	Protein of unknown function (DUF788), putative	1	612.475	860.528	1.405	0.147676	488	396	1.23232	0.0907246	0.00258533	0.0080065	0.646557	0.567094	0.877099
Ld1S_010008900	Dyggve-Melchior-Clausen syndrome protein, putative	1	2411.39	3489.01	1.44689	0.160434	1586	1060	1.49623	0.174997	4.62157e-13	1.31453e-11	0.43958	0.45457	1.0341
Ld1S_010009000	hypothetical protein	1	2390.3	3483.56	1.45737	0.16357	1150	719	1.59944	0.203969	1.88102e-11	4.07199e-10	0.300799	0.330122	1.09749
Ld1S_010009100	hypothetical protein	1	1583.45	2374.36	1.49948	0.175942	342	211	1.62085	0.209744	4.01185e-06	2.64121e-05	0.133253	0.144039	1.08094
Ld1S_010009300	ribosomal protein S7, putative;ribosomal protein S7, putative (fragment)	1	630.813	834.352	1.32266	0.121449	2872	2216	1.29603	0.112615	0.00311359	0.00940712	3.51293	3.44219	0.979865
Ld1S_010009400	Ring finger domain/Zn-finger in ubiquitin-hydrolases and other protein, putative	1	2195.01	3170.54	1.44443	0.159697	863	428	2.01636	0.304567	1.26286e-19	1.0471e-17	0.194988	0.272194	1.39595
Ld1S_010009500	Protein of unknown function (DUF791), putative	1	1810.84	2455.07	1.35576	0.132184	1390	907	1.53252	0.185408	8.86634e-10	1.32303e-08	0.500873	0.566176	1.13038
Ld1S_010009600	alpha/beta-hydrolase-like protein	1	738.088	1101.56	1.49245	0.173901	1217	832	1.46274	0.165167	3.30387e-08	3.61615e-07	1.12724	1.10479	0.98009
Ld1S_010009700	conserved protein	1	4222.23	5983.34	1.4171	0.151402	4174	2412	1.73051	0.238175	8.60297e-13	2.34091e-11	0.571262	0.697604	1.22116
Ld1S_010009800	fatty acyl CoA synthetase 2, putative;long chain fatty acid CoA ligase, putative;fatty acyl CoA syntetase 1, putative;long chain fatty Acyl CoA synthetase, putative	1	2044.64	2862.97	1.40023	0.1462	2026	1424	1.42275	0.153129	7.12165e-14	2.40739e-12	0.696455	0.707656	1.01608
Ld1S_010009900	beta eliminating lyase,putative	1	1007.65	1435.3	1.42441	0.153634	1393	804	1.73259	0.238695	1.54024e-16	8.67769e-15	0.797896	0.970527	1.21636
Ld1S_010010000	fatty acyl CoA synthetase 2, putative;long chain fatty acid CoA ligase, putative;fatty acyl CoA syntetase 1, putative;long chain fatty Acyl CoA synthetase, putative	1	2095.07	2746.27	1.31083	0.117545	2199	1261	1.74385	0.24151	6.49123e-25	1.32678e-22	0.601889	0.800722	1.33035
Ld1S_010010100	fatty acyl CoA synthetase 2, putative;long chain fatty acid CoA ligase, putative;fatty acyl CoA syntetase 1, putative;long chain fatty Acyl CoA synthetase, putative	1	1893.36	2834.62	1.49714	0.175262	1302	1680	0.775	-0.110698	3.63126e-05	0.000191223	0.887313	0.459322	0.517654
Ld1S_010010300	fatty acyl CoA synthetase 2, putative;long chain fatty acid CoA ligase, putative;fatty acyl CoA syntetase 1, putative;long chain fatty Acyl CoA synthetase, putative	1	2112.49	3023.3	1.43115	0.155686	3374	2518	1.33995	0.127089	6.1554e-07	4.92264e-06	1.19196	1.116	0.936274
Ld1S_010010400	long chain fatty acid CoA ligase, putative	1	4710.93	6760.98	1.43517	0.156903	1219	640	1.90469	0.279824	2.23959e-20	2.21166e-18	0.135854	0.180299	1.32715
Ld1S_010010500	RING. Posttranslational modification, protein turnover, chaperones	1	2052.89	2862.97	1.3946	0.144451	1671	992	1.68448	0.226465	2.62936e-16	1.40057e-14	0.483221	0.583659	1.20785
Ld1S_010010600	hypothetical protein	1	1053.49	1553.09	1.47423	0.168566	872	468	1.86325	0.270271	1.26217e-14	5.15962e-13	0.444236	0.56146	1.26388
Ld1S_010010700	pre-mRNA processing factor 3 (PRP3)/Protein of unknown function (DUF1115), putative	1	1886.02	2272.93	1.20514	0.0810391	1296	788	1.64467	0.216079	7.3016e-12	1.7113e-10	0.417811	0.57019	1.36471
Ld1S_010010900	hypothetical protein	1	2877.17	4070.33	1.4147	0.150664	961	607	1.5832	0.199535	2.06455e-12	5.29019e-11	0.210971	0.236099	1.1191
Ld1S_010011000	mitochondrial RNA editing ligase 1	1	1327.64	1919.55	1.44584	0.16012	1702	1407	1.20967	0.0826655	0.000148725	0.000660506	1.05977	0.886664	0.836654
Ld1S_010011100	Rab-GTPase-TBC domain containing protein, putative	1	5743.33	7667.31	1.33499	0.125479	1424	809	1.7602	0.245561	4.13065e-20	3.7817e-18	0.140859	0.185723	1.31851
Ld1S_010011200	DNA-damage inducible protein DDI1-like protein	1	738.088	1027.4	1.39197	0.143631	615	456	1.34868	0.12991	1.38593e-05	8.05085e-05	0.617813	0.5986	0.968901
Ld1S_010011300	hypothetical protein	1	1881.44	2601.21	1.38257	0.140687	2120	1497	1.41617	0.151114	1.02195e-07	9.87082e-07	0.795669	0.815004	1.0243
Ld1S_010011400	hypothetical protein	1	2026.3	2882.6	1.42259	0.153081	1432	899	1.59288	0.202183	1.67273e-14	6.59265e-13	0.443665	0.496773	1.1197
Ld1S_010011500	HSP70-like protein	1	3394.29	4606.93	1.35726	0.132663	2485	1581	1.57179	0.196395	8.05258e-08	7.98223e-07	0.465783	0.539405	1.15806
Ld1S_010011600	mitochondrial-processing peptidase subunit beta, putative	1	1437.67	1973	1.37236	0.137468	2525	1792	1.40904	0.148923	1.6255e-10	2.82342e-09	1.24646	1.27978	1.02673
Ld1S_010011700	hypothetical protein	1	4580.73	6241.82	1.36263	0.134377	1743	979	1.78039	0.250515	2.33336e-09	3.23468e-08	0.213721	0.279245	1.30659
Ld1S_010011800	Poly(A)-binding protein. RNA processing and modification;Translation, ribosomal structure and biogenesis	1	892.124	1277.16	1.43159	0.15582	437	282	1.54965	0.190232	8.05059e-08	7.98223e-07	0.3161	0.342166	1.08246
Ld1S_010011900_pseudogene	hypothetical protein	1	2468.24	3554.45	1.44007	0.158385	1017	666	1.52703	0.183847	8.30921e-11	1.55382e-09	0.269828	0.28612	1.06038
Ld1S_010012000	PLAC8 family, putative	1	688.576	971.775	1.41128	0.149613	722	525	1.37524	0.138378	4.14795e-08	4.42969e-07	0.762443	0.742971	0.974461
Ld1S_010012200	ubiquitin activating enzyme, putative	1	1588.95	2219.49	1.39682	0.145141	1021	641	1.59282	0.202168	7.63358e-16	3.79048e-14	0.403411	0.460017	1.14032
Ld1S_010012300	hypothetical protein	1	4891.55	6675.91	1.36478	0.135064	1434	628	2.28344	0.35859	1.65102e-34	9.06925e-32	0.128385	0.214802	1.67312
Ld1S_010012400	Meckel syndrome type 6 protein, putative	1	6698.72	9443.99	1.40982	0.149164	2025	1264	1.60206	0.204678	5.01517e-13	1.41731e-11	0.188693	0.214422	1.13636
Ld1S_010012500	hypothetical protein	1	2186.76	3124.73	1.42893	0.155012	991	575	1.72348	0.236406	2.63615e-09	3.6089e-08	0.262946	0.317147	1.20613
Ld1S_010012600	protein kinase, putative	1	4287.33	5766.3	1.34496	0.12871	1345	817	1.64627	0.2165	2.27619e-17	1.48189e-15	0.190562	0.233252	1.22402
Ld1S_010013000	hypothetical protein	1	1508.27	2151.86	1.42671	0.154337	1177	887	1.32694	0.122853	6.51362e-08	6.61829e-07	0.588092	0.546968	0.930071
Ld1S_010013100_pseudogene	C2H2-type domain-containing protein	1	1649.47	2106.06	1.27681	0.106127	815	501	1.62675	0.21132	9.80887e-11	1.79604e-09	0.303735	0.386979	1.27407
Ld1S_010013200	calcium/potassium channel (CAKC), putative	1	2914.76	4031.06	1.38298	0.140817	1180	840	1.40476	0.147603	1.67612e-11	3.65543e-10	0.288188	0.292727	1.01575
Ld1S_010013300	potassium channel subunit-like protein	1	3341.11	4782.53	1.43142	0.155767	1147	742	1.54582	0.18916	9.164e-13	2.48588e-11	0.222082	0.239831	1.07992
Ld1S_020182700	cytochrome b-domain protein, putative	2	626.229	735.102	1.17386	0.0696148	420	537	0.782123	-0.106725	0.00293046	0.00891204	0.857514	0.571349	0.666285
Ld1S_020183000	hypothetical protein	2	2807.48	3083.28	1.09824	0.0406963	735	568	1.29401	0.111939	5.7316e-05	0.000284927	0.202316	0.238382	1.17826
Ld1S_020183600	Zinc-finger of C2H2 type, putative	2	730.753	727.468	0.995504	-0.00195684	767	974	0.787474	-0.103764	8.20171e-06	5.04796e-05	1.33287	1.05434	0.791031
Ld1S_020183800	Vps51/Vps67, putative	2	5906.54	5872.09	0.994168	-0.00254002	1150	917	1.25409	0.0983285	0.000553528	0.0021024	0.155252	0.195842	1.26145
Ld1S_020184400	phosphoglycan beta 1,3 galactosyltransferase, putative (fragment);phosphoglycan beta 1,3 galactosyltransferase	2	2186.76	2121.33	0.970078	-0.0131931	441	628	0.702229	-0.153521	4.1451e-06	2.72288e-05	0.287183	0.207889	0.723889
Ld1S_020184500	phosphoglycan beta 1,3 galactosyltransferase, putative (fragment);phosphoglycan beta 1,3 galactosyltransferase	2	2582.85	2391.81	0.926035	-0.0333726	189	260	0.726923	-0.138512	0.000954721	0.00337804	0.100664	0.0790197	0.784984
Ld1S_020184600	phosphoglycan beta 1,2 arabinosyltransferase	2	2057.48	2060.25	1.00135	0.000584753	770	376	2.04787	0.311303	2.35724e-22	3.13906e-20	0.182748	0.373741	2.04512
Ld1S_020185000	small GTP binding protein rab6-like protein	2	893.957	867.072	0.969925	-0.0132618	514	377	1.3634	0.134622	2.61744e-05	0.000142975	0.42172	0.5928	1.40567
Ld1S_020185100	hypothetical protein	2	291.568	299.93	1.02868	0.0122812	482	637	0.756672	-0.121092	9.23783e-05	0.000435975	2.18474	1.60704	0.735574
Ld1S_020185400	ATP-binding cassette protein subfamily A, member 9, putative;ATP-binding cassette protein subfamily A, member 6, putative;ATP-binding cassette protein subfamily A, member 3, putative (fragment);ATP-binding cassette protein subfamily A, member 7, putative;	2	7081.98	7108.9	1.0038	0.00164774	1039	1609	0.645743	-0.18994	2.23894e-06	1.55927e-05	0.227196	0.146155	0.643297
Ld1S_020185500	Soluble NSF attachment protein, SNAP, putative	2	2007.05	2270.75	1.13139	0.0536106	951	1432	0.664106	-0.177763	6.27662e-14	2.17186e-12	0.713485	0.418805	0.586985
Ld1S_020185800	UAA transporter family, putative	2	2900.09	2814.98	0.970654	-0.0129355	650	539	1.20594	0.0813246	0.00218145	0.0069066	0.185856	0.230907	1.2424
Ld1S_020186500	Kinetoplastid RNA editing protein 1, putative (fragment)	2	2971.61	3037.48	1.02217	0.00952182	763	505	1.51089	0.179233	2.82761e-10	4.73369e-09	0.169942	0.251195	1.47813
Ld1S_020186800_pseudogene	Transmembrane amino acid transporter protein, putative	2	1154.35	1079.75	0.935374	-0.0290149	316	399	0.79198	-0.101286	0.00175564	0.00571283	0.345649	0.29266	0.846699
Ld1S_020187000	voltage-dependent anion-selective channel, putative	2	923.297	883.431	0.956822	-0.0191688	1732	2398	0.722269	-0.141301	2.49145e-07	2.21858e-06	2.59721	1.96054	0.754862
Ld1S_020187300	hypothetical protein	2	768.345	739.465	0.962413	-0.0166387	257	163	1.57669	0.197746	3.90921e-05	0.000203784	0.212144	0.347549	1.63827
Ld1S_020187900	hypothetical protein	2	2461.82	2325.28	0.944536	-0.0247814	984	1196	0.822742	-0.0847361	0.0015354	0.00508848	0.485819	0.423175	0.871055
Ld1S_020188100	function. Function unknown	2	547.377	508.246	0.928511	-0.0322128	1552	3189	0.486673	-0.312763	3.49488e-34	1.80685e-31	5.82597	3.05364	0.524143
Ld1S_020188900	gamma-glutamyl phosphate reductase-like protein	2	1822.76	1820.3	0.998655	-0.000584396	274	357	0.767507	-0.114918	0.00103746	0.00362698	0.195857	0.150524	0.76854
Ld1S_020189200	Nop14-like family, putative	2	2576.43	2758.27	1.07058	0.0296182	555	400	1.3875	0.142233	9.58378e-06	5.79311e-05	0.155254	0.201213	1.29603
Ld1S_030444900	Leucine rich repeat/Leucine Rich Repeat, putative	3	2595.69	2597.94	1.00087	0.000377535	358	586	0.610922	-0.214015	3.96281e-12	9.63192e-11	0.225759	0.137801	0.610391
Ld1S_030445000	hypothetical protein	3	725.252	807.085	1.11284	0.0464309	330	402	0.820896	-0.0857121	0.0029726	0.00901525	0.55429	0.408879	0.737661
Ld1S_030446100	hypothetical protein	3	494.198	508.246	1.02843	0.0121728	324	421	0.769596	-0.113737	0.000750139	0.00274022	0.851885	0.637487	0.748325
Ld1S_030446200	hypothetical protein	3	813.272	833.261	1.02458	0.0105454	1321	1854	0.712513	-0.147207	2.06784e-06	1.45394e-05	2.27968	1.58534	0.695421
Ld1S_030447200	ribosomal protein L38, putative	3	331.91	343.557	1.03509	0.0149776	6344	7895	0.803547	-0.094989	1.11043e-05	6.63467e-05	23.7865	18.4657	0.776307
Ld1S_030447700	hypothetical protein	3	5613.14	5557.98	0.990175	-0.00428826	595	824	0.722087	-0.14141	0.000293377	0.00121925	0.146799	0.107053	0.729253
Ld1S_030448100	protein kinase, putative	3	3938	3835.84	0.974058	-0.0114152	1052	809	1.30037	0.114067	3.5088e-05	0.000186113	0.205434	0.274256	1.335
Ld1S_030448300	GPR1/FUN34/yaaH family, putative	3	791.267	868.162	1.09718	0.0402779	521	396	1.31566	0.119143	0.00137547	0.00463004	0.500463	0.600118	1.19913
Ld1S_030448600	GPR1/FUN34/yaaH family, putative	3	821.524	840.896	1.02358	0.010122	508	780	0.651282	-0.186231	4.78197e-07	3.93896e-06	0.949455	0.604118	0.636278
Ld1S_030449100	TLD domain protein, conserved	3	4720.09	4640.74	0.983188	-0.00736333	1176	865	1.35954	0.133391	2.63288e-08	2.9366e-07	0.183259	0.253408	1.38278
Ld1S_030449700	phosphate-Repressible Phosphate Permease-like protein;phosphate-repressible phosphate permease	3	1480.76	1524.74	1.0297	0.0127103	465	596	0.780201	-0.107793	0.00146728	0.00488668	0.402496	0.304971	0.757698
Ld1S_030449900	RNA recognition motif. (a.k.a. RRM, RBD, or RNP domain), putative	3	2282.11	2325.28	1.01891	0.00813795	1280	935	1.36898	0.136398	1.06174e-06	8.00998e-06	0.409708	0.550472	1.34357
Ld1S_030450000	hypothetical protein	3	5796.51	5787.02	0.998363	-0.000711599	1752	1352	1.29586	0.112557	3.31529e-06	2.22428e-05	0.233244	0.302746	1.29798
Ld1S_030450100	26S protease regulatory subunit, putative	3	1196.53	1195.36	0.999023	-0.00042431	1202	1545	0.777994	-0.109024	6.89523e-07	5.44494e-06	1.29124	1.00556	0.778754
Ld1S_030450800	kinase-like protein	3	1042.49	1036.12	0.993891	-0.00266121	899	1143	0.786527	-0.104287	2.21268e-05	0.00012285	1.09641	0.867657	0.791361
Ld1S_030451400	hypothetical protein	3	1621.04	1517.1	0.935881	-0.0287795	314	238	1.31933	0.120353	0.00158064	0.00522068	0.146819	0.206973	1.40972
Ld1S_030451500	Uroporphyrinogen-III synthase HemD, putative	3	865.534	958.687	1.10762	0.0443925	221	365	0.605479	-0.217901	7.35656e-08	7.40628e-07	0.421705	0.230524	0.546647
Ld1S_030451700	DEAD/DEAH box helicase, putative	3	5944.13	6060.78	1.01962	0.00844002	5273	3963	1.33056	0.124034	4.27554e-10	6.88236e-09	0.666708	0.870021	1.30495
Ld1S_030451800	hypothetical protein	3	8025.44	7645.5	0.952657	-0.0210633	1445	1142	1.26532	0.102202	0.000466558	0.00182329	0.142297	0.189	1.3282
Ld1S_030452300	TatD related DNase, putative	3	2138.16	2003.54	0.937036	-0.0282437	942	767	1.22816	0.0892555	0.00137894	0.00463724	0.358719	0.470169	1.31069
Ld1S_030453300	hypothetical protein	3	2739.64	2797.53	1.02113	0.00908242	542	263	2.06084	0.314044	3.78039e-14	1.36732e-12	0.0959982	0.193742	2.01819
Ld1S_030453500	hypothetical protein	3	4109.45	3986.35	0.970043	-0.0132088	867	704	1.23153	0.0904464	0.000315289	0.00130281	0.171312	0.217492	1.26957
Ld1S_030453700	hypothetical protein	3	5657.15	5853.55	1.03472	0.0148221	1272	928	1.37069	0.136939	6.055e-06	3.83964e-05	0.16404	0.217304	1.3247
Ld1S_030454000	inorganic pyrophosphatase, putative	3	622.561	636.943	1.0231	0.00991872	884	1361	0.649522	-0.187406	1.02141e-14	4.31596e-13	2.18613	1.38788	0.634856
Ld1S_030454600_pseudogene	MORN repeat, putative	3	993.897	992.497	0.998591	-0.000612243	1107	1504	0.736037	-0.1331	3.7462e-07	3.17812e-06	1.51324	1.11537	0.737076
Ld1S_040797500	hypothetical protein	4	1302.89	1292.43	0.991973	-0.00350008	864	521	1.65835	0.219676	8.18814e-10	1.23229e-08	0.399882	0.668509	1.67177
Ld1S_040797800	DNA topoisomerase type IB small subunit	4	720.667	698.02	0.968575	-0.0138669	538	413	1.30266	0.114832	2.80345e-05	0.000151908	0.57308	0.770752	1.34493
Ld1S_040798100	hypothetical protein	4	4697.17	5154.44	1.09735	0.040345	2490	1962	1.26911	0.1035	1.37679e-05	8.00837e-05	0.417698	0.483079	1.15653
Ld1S_040798200	hypothetical protein	4	1526.6	1693.79	1.10951	0.0451329	871	684	1.27339	0.104962	0.00106422	0.00371161	0.448053	0.514232	1.1477
Ld1S_040798700	hypothetical protein	4	1265.29	1424.4	1.12574	0.0514397	27	55	0.490909	-0.308999	0.000220615	0.000949087	0.0434682	0.0189554	0.436075
Ld1S_040798900	surface antigen-like protein (fragment)	4	1355.15	1422.22	1.04949	0.0209788	213	425	0.501176	-0.300009	6.72288e-16	3.37642e-14	0.313619	0.149766	0.477542
Ld1S_040799000	surface antigen-like protein (fragment)	4	1841.09	2031.89	1.10363	0.0428248	385	825	0.466667	-0.330993	8.28456e-26	1.96792e-23	0.448103	0.189479	0.422846
Ld1S_040799200	surface antigen-like protein	4	783.932	861.618	1.0991	0.0410366	268	535	0.500935	-0.300219	1.80863e-14	7.01166e-13	0.682457	0.311043	0.455769
Ld1S_040799400	hypothetical protein	4	718.833	726.377	1.01049	0.00453381	583	719	0.810848	-0.0910603	0.00152986	0.00507585	1.00023	0.802614	0.802428
Ld1S_040799500	GRAM domain containing protein, putative	4	884.789	985.953	1.11434	0.0470168	892	1269	0.702916	-0.153097	7.92705e-09	9.8128e-08	1.43424	0.904708	0.630792
Ld1S_040799600_pseudogene	RNA pseudouridylate synthase-like protein	4	3827.97	4100.87	1.07129	0.029907	888	638	1.39185	0.143592	8.99536e-07	6.92903e-06	0.166668	0.21654	1.29923
Ld1S_040800200	beta-fructofuranosidase-like protein;beta-fructofuranosidase, putative;beta-fructofuranosidase, putative (fragment)	4	1645.8	1662.16	1.00994	0.00429616	1559	511	3.05088	0.484425	3.63757e-50	1.06569e-46	0.310488	0.937936	3.02085
Ld1S_040800400	mitochondrial exoribonuclease DSS-1, putative	4	2126.24	2319.83	1.09104	0.0378424	1064	814	1.30713	0.116317	3.4791e-06	2.32177e-05	0.382835	0.458655	1.19805
Ld1S_040800500	ADP-ribosylation factor, putative	4	487.78	538.784	1.10456	0.043191	726	884	0.821267	-0.0855156	0.000904754	0.00322853	1.81229	1.34748	0.743521
Ld1S_040800700	hypothetical protein	4	592.304	605.314	1.02197	0.00943611	407	297	1.37037	0.136838	1.85105e-05	0.000104691	0.501432	0.672378	1.34092
Ld1S_040800900	hypothetical protein	4	661.987	734.012	1.1088	0.0448535	295	469	0.628998	-0.201351	1.25637e-10	2.23527e-09	0.708473	0.401901	0.567278
Ld1S_040801000	anaphase promoting complex, subunit 10-like protein	4	857.282	949.961	1.10811	0.0445822	907	1090	0.83211	-0.0798192	0.00111883	0.00387438	1.27146	0.954776	0.750929
Ld1S_040801500	calpain-like cysteine peptidase, putative	4	2357.3	2347.09	0.995671	-0.00188416	1352	1951	0.692978	-0.159281	2.43121e-05	0.000133549	0.827643	0.576032	0.695991
Ld1S_040801600	adenylosuccinate lyase, putative	4	1250.62	1318.6	1.05436	0.0229876	1774	2107	0.841955	-0.0747109	6.6637e-05	0.00032628	1.68476	1.34536	0.798549
Ld1S_040801900	hypothetical protein	4	892.124	939.055	1.05261	0.022266	906	683	1.3265	0.122707	0.000559802	0.00212256	0.765589	0.9648	1.26021
Ld1S_040802000	Nucleotidyltransferase domain containing protein, putative	4	7514.74	7889.81	1.04991	0.0211522	2200	1609	1.36731	0.135867	6.11425e-05	0.000302239	0.214112	0.278841	1.30231
Ld1S_040802100	hypothetical protein	4	3871.98	4016.89	1.03742	0.0159563	1912	1511	1.26539	0.102223	0.000722354	0.00265417	0.390239	0.475991	1.21974
Ld1S_040802700	DENN (AEX-3) domain containing protein, putative	4	3670.27	3756.22	1.02342	0.0100532	1298	1034	1.25532	0.0987542	1.58976e-05	9.12038e-05	0.281723	0.34556	1.22659
Ld1S_040802800	spermidine synthase, putative	4	832.526	892.157	1.07163	0.0300431	1452	1241	1.17002	0.0681948	0.00271281	0.00833668	1.49064	1.62752	1.09182
Ld1S_040803500	hypothetical protein	4	579.468	624.946	1.07848	0.0328132	5123	6159	0.831791	-0.0799858	4.4e-05	0.000226018	10.6287	8.19751	0.77126
Ld1S_040803900	hypothetical protein	4	460.273	450.441	0.978638	-0.00937802	1000	558	1.79211	0.253366	4.5654e-15	1.99628e-13	1.21232	2.22005	1.83123
Ld1S_040804100	axonemal dynein light chain, putative	4	1818.17	1892.29	1.04076	0.0173524	1252	937	1.33618	0.125865	9.64203e-06	5.82431e-05	0.515353	0.661633	1.28384
Ld1S_040804500	Protein of unknown function (DUF974), putative	4	1800.75	1962.09	1.0896	0.0372653	681	572	1.19056	0.0757511	0.00267811	0.00823581	0.317645	0.347079	1.09266
Ld1S_040804900	nascent polypeptide associated complex subunit- like protein, copy 1	4	504.284	600.951	1.19169	0.0761646	910	670	1.35821	0.132967	8.38979e-06	5.13853e-05	1.32862	1.51427	1.13973
Ld1S_040805000	heat shock protein, putative	4	1378.07	1498.56	1.08744	0.0364034	961	804	1.19527	0.0774673	0.00212537	0.00675827	0.583425	0.641282	1.09917
Ld1S_040805200	hypothetical protein	4	1062.66	1086.29	1.02224	0.00955155	857	693	1.23665	0.0922476	0.00057696	0.00217579	0.652135	0.788921	1.20975
Ld1S_040805300	Pescadillo N-terminus/BRCA1 C Terminus (BRCT) domain containing protein, putative	4	1674.22	1686.15	1.00713	0.00308436	1750	1346	1.30015	0.113993	7.83608e-06	4.83542e-05	0.803956	1.03786	1.29095
Ld1S_040805600	tyrosine phospatase-like protein	4	2348.13	2353.64	1.00235	0.00101751	1199	869	1.37975	0.139799	5.58066e-07	4.51643e-06	0.370082	0.509425	1.37652
Ld1S_040805700	rhomboid-like protein	4	1011.32	994.678	0.983547	-0.00720503	1486	1014	1.46548	0.165981	1.98471e-13	6.12057e-12	1.00265	1.49395	1.49
Ld1S_040806400	hypothetical protein	4	1560.53	1577.09	1.01061	0.00458438	762	548	1.39051	0.143174	3.84043e-07	3.25179e-06	0.351163	0.483169	1.37591
Ld1S_040806600	chaperone protein DnaJ, putative	4	1345.98	1273.89	0.946439	-0.0239076	1002	593	1.68971	0.227813	4.08087e-13	1.18372e-11	0.440572	0.786569	1.78534
Ld1S_040807900	hypothetical protein	4	1259.79	1280.43	1.01638	0.00705701	596	455	1.30989	0.117235	0.00011694	0.00053447	0.361171	0.465469	1.28878
Ld1S_040808100	Transcriptional repressor TCF25, putative	4	2257.36	2437.62	1.07985	0.0333651	1328	959	1.38478	0.141379	6.34039e-08	6.4647e-07	0.424833	0.544795	1.28237
Ld1S_040808200	hypothetical protein	4	3394.29	3298.14	0.971675	-0.012479	1532	1200	1.27667	0.106078	0.000129201	0.000582331	0.353535	0.464504	1.31388
Ld1S_040808300_pseudogene	hypothetical protein	4	638.148	695.839	1.0904	0.0375871	579	725	0.798621	-0.0976594	0.000461549	0.00180693	1.1361	0.83209	0.732409
Ld1S_040808600	cytochrome c oxidase assembly factor, putative	4	786.682	809.267	1.02871	0.0122923	713	570	1.25088	0.0972147	0.000683982	0.00252161	0.724562	0.881044	1.21597
Ld1S_040808700	zinc carboxypeptidase. Amino acid transport and metabolism	4	831.61	900.882	1.0833	0.0347484	420	298	1.4094	0.149033	2.94221e-06	1.99222e-05	0.358341	0.46621	1.30102
Ld1S_040809000	hypothetical protein	4	674.823	653.303	0.96811	-0.0140753	603	446	1.35202	0.130982	1.81903e-05	0.000103012	0.660914	0.923002	1.39655
Ld1S_040809300	tRNA nucleotidyltransferase, putative	4	1266.21	1331.69	1.05171	0.0218976	1297	1076	1.20539	0.0811277	0.000314403	0.00129976	0.84978	0.97395	1.14612
Ld1S_040809400	Leucine Rich repeat, putative	4	483.195	431.9	0.893841	-0.0487398	447	332	1.34639	0.129169	0.00030727	0.00127326	0.687093	1.03496	1.50629
Ld1S_040809500	casein kinase I, putative	4	766.511	786.363	1.0259	0.0111046	593	911	0.650933	-0.186464	1.42051e-05	8.23538e-05	1.1885	0.754105	0.6345
Ld1S_040809600	S-phase cyclin A-associated protein in the ER. Function unknown	4	2273.86	2460.52	1.08209	0.0342631	1660	1278	1.2989	0.113577	8.75649e-06	5.35193e-05	0.56204	0.674654	1.20037
Ld1S_050810200	Receptor-type adenylate cyclase. Signal transduction mechanisms	5	2631.44	3334.14	1.26704	0.102789	2398	1808	1.32633	0.122651	1.19657e-05	7.08671e-05	0.687075	0.719227	1.04679
Ld1S_050810700	phosphoprotein phosphatase, putative	5	2028.14	2756.09	1.35893	0.133196	2660	2228	1.1939	0.0769665	0.00129263	0.00438138	1.09855	0.965136	0.878558
Ld1S_050810900	hypothetical protein	5	1171.77	1535.64	1.31053	0.117447	903	641	1.40874	0.14883	6.01456e-09	7.617e-08	0.547035	0.588027	1.07494
Ld1S_050811000	protein kinase, putative	5	1536.69	2064.61	1.34355	0.128252	912	619	1.47334	0.168304	1.03e-07	9.93709e-07	0.402814	0.441729	1.09661
Ld1S_050811100	nucleolar RNA helicase II, putative	5	2272.94	2732.09	1.20201	0.0799069	973	477	2.03983	0.309594	4.68052e-26	1.17535e-23	0.20986	0.356137	1.69702
Ld1S_050811300	Kinesin family member. Cytoskeleton	5	1781.5	2401.62	1.34809	0.12972	771	583	1.32247	0.121386	0.000100403	0.00046814	0.327253	0.321033	0.980992
Ld1S_050811400	basal body component, putative	5	2656.2	3389.76	1.27617	0.105908	1127	714	1.57843	0.198226	2.31446e-12	5.86219e-11	0.268805	0.332472	1.23685
Ld1S_050811500	dihydrolipoamide branched chain transacylase, putative	5	1620.13	2114.78	1.30532	0.115717	1153	664	1.73645	0.239661	3.04285e-20	2.93886e-18	0.409845	0.54521	1.33028
Ld1S_050811600	Fip1 motif/Zinc finger C-x8-C-x5-C-x3-H type (and similar), putative	5	1378.99	1758.14	1.27495	0.105493	1231	802	1.53491	0.186084	5.4222e-11	1.07818e-09	0.581587	0.700173	1.2039
Ld1S_050811700	50S ribosome-binding GTPase, putative	5	2652.53	3435.57	1.2952	0.112338	1635	835	1.95808	0.291831	1.51058e-24	2.82478e-22	0.314794	0.475904	1.5118
Ld1S_050811800	hypothetical protein	5	4779.69	6182.93	1.29358	0.111794	1615	913	1.76889	0.247702	2.74898e-18	1.99676e-16	0.191016	0.261203	1.36744
Ld1S_050811900	dual specificity phosphatase-like protein	5	2142.75	2897.87	1.35241	0.131108	1093	826	1.32324	0.12164	0.000300371	0.00124703	0.385486	0.377173	0.978434
Ld1S_050812400	hypothetical protein	5	1012.23	1370.95	1.35438	0.131742	1206	938	1.28571	0.109144	0.000170106	0.000745667	0.926663	0.879679	0.949298
Ld1S_050812900	glutaredoxin-like protein	5	733.503	959.777	1.30848	0.116768	532	373	1.42627	0.154203	6.43733e-07	5.12944e-06	0.508518	0.554295	1.09002
Ld1S_050813100	DNA replication licensing factor, putative	5	3349.36	4561.12	1.36179	0.13411	1343	948	1.41667	0.151268	6.51509e-07	5.17731e-06	0.283039	0.294445	1.0403
Ld1S_050813400	ATP-dependent RNA helicase, putative	5	2228.93	2552.14	1.145	0.0588065	806	379	2.12665	0.327696	1.7825e-13	5.57523e-12	0.170036	0.315814	1.85733
Ld1S_050813500	hypothetical protein	5	1187.36	1413.49	1.19045	0.0757109	847	654	1.29511	0.112306	7.23603e-05	0.000351562	0.550802	0.599226	1.08791
Ld1S_050813700	protein kinase, putative	5	2456.32	3117.1	1.26901	0.103465	2193	1675	1.30925	0.117024	2.17145e-05	0.00012079	0.681914	0.70354	1.03171
Ld1S_050813800	structural maintenance of chromosome (SMC), putative	5	3991.18	4806.52	1.20429	0.08073	2622	2028	1.2929	0.111565	5.68481e-05	0.000283081	0.508121	0.545509	1.07358
Ld1S_050813900	TPR repeat, putative	5	2882.67	3668.97	1.27277	0.104749	1139	722	1.57756	0.197987	5.07027e-13	1.42829e-11	0.250462	0.310442	1.23947
Ld1S_050814200	hypothetical protein	5	2926.68	3761.67	1.2853	0.109006	1016	674	1.50742	0.178234	2.25499e-09	3.14714e-08	0.230295	0.270093	1.17281
Ld1S_050814400	GTPase, putative	5	1963.96	2552.14	1.29949	0.113772	832	368	2.26087	0.354276	1.41871e-27	4.29966e-25	0.187377	0.326002	1.73982
Ld1S_050814500_pseudogene	hypothetical protein	5	1144.27	1409.13	1.23147	0.0904236	591	466	1.26824	0.103202	0.000525391	0.0020103	0.407248	0.419408	1.02986
Ld1S_050814700	hypothetical protein	5	683.992	856.165	1.25172	0.0975065	1305	1095	1.19178	0.0761964	0.00269527	0.00828566	1.6009	1.52424	0.952116
Ld1S_050815100	nuclear receptor binding factor-like protein	5	1222.2	1502.92	1.22969	0.0897947	688	516	1.33333	0.124939	0.00058978	0.00221615	0.422189	0.457774	1.08429
Ld1S_050815200	kinetoplast-associated protein-like protein	5	6620.79	8011.96	1.21012	0.0828292	2605	1892	1.37685	0.138887	8.53898e-11	1.5934e-09	0.285767	0.325139	1.13778
Ld1S_050815300	u6 snrna-associated sm-like protein lsm3	5	628.062	766.731	1.22079	0.0866404	541	444	1.21847	0.0858143	0.00228107	0.00719611	0.706936	0.705593	0.9981
Ld1S_050815500	hypothetical protein	5	1632.05	1890.11	1.15812	0.0637542	570	383	1.48825	0.172676	1.10115e-08	1.32394e-07	0.234675	0.30157	1.28506
Ld1S_050815700	hypothetical protein	5	2505.83	3210.89	1.28137	0.107674	2560	2143	1.19459	0.0772178	0.000373611	0.00149987	0.855205	0.797286	0.932275
Ld1S_050815800	ATP-dependent RNA helicase, putative	5	3614.34	4257.92	1.17806	0.0711688	1240	785	1.57962	0.198552	6.98236e-11	1.32831e-09	0.217191	0.291222	1.34086
Ld1S_050815900	COG4 transport protein, putative	5	2882.67	3623.16	1.25688	0.0992927	1120	619	1.80937	0.257527	6.24167e-21	6.53072e-19	0.214732	0.309122	1.43958
Ld1S_050816000	Surp module, putative	5	3300.77	4261.19	1.29097	0.110917	1065	622	1.71222	0.233559	4.03579e-18	2.88379e-16	0.188441	0.24993	1.3263
Ld1S_050816100	hypothetical protein	5	3032.12	3952.54	1.30356	0.11513	1300	907	1.4333	0.156336	1.61233e-06	1.16345e-05	0.299131	0.328903	1.09953
Ld1S_050816200	kinesin, putative	5	4158.05	5101	1.22678	0.0887657	2754	2273	1.21161	0.0833645	0.000618845	0.00231645	0.546651	0.539894	0.98764
Ld1S_050816300	Ankyrin repeats (many copies)/Ankyrin repeats (3 copies), putative	5	6205.44	7761.11	1.25069	0.0971512	2445	1728	1.41493	0.150735	9.77746e-08	9.49548e-07	0.278465	0.315032	1.13132
Ld1S_050816400	hypothetical protein	5	3077.05	3748.58	1.21824	0.0857332	1193	854	1.39696	0.145183	7.80715e-07	6.08847e-06	0.277539	0.318253	1.1467
Ld1S_050816500	nitroreductase-like protein	5	1223.12	1561.82	1.27692	0.106163	749	506	1.48024	0.170331	1.10506e-05	6.61156e-05	0.413697	0.479569	1.15923
Ld1S_050816600	hypothetical protein	5	7863.16	10038.4	1.27664	0.106067	2438	1744	1.39794	0.145487	3.94467e-06	2.59893e-05	0.221794	0.242867	1.09501
Ld1S_050816700	sre-2/carboxylate carrier-like protein	5	1314.8	1530.19	1.16382	0.0658842	891	565	1.57699	0.197829	5.45146e-11	1.08155e-09	0.429722	0.58228	1.35502
Ld1S_050816800	Sperm-tail PG-rich repeat, putative	5	8906.57	11152	1.25211	0.0976409	2814	1558	1.80616	0.256757	9.19477e-10	1.36278e-08	0.174927	0.252332	1.4425
Ld1S_050816900	hypothetical protein	5	5932.21	7406.65	1.24855	0.0964051	1407	867	1.62284	0.210275	2.2073e-09	3.09821e-08	0.146151	0.189965	1.29978
Ld1S_050817000	CYC2-like cyclin, putative	5	4632.07	5856.82	1.26441	0.101887	4792	3063	1.56448	0.19437	1.66624e-16	9.21041e-15	0.661259	0.818191	1.23732
Ld1S_050817100	phophatase-like protein	5	4611.9	5818.65	1.26166	0.100942	1867	1287	1.45066	0.161566	1.31757e-12	3.48799e-11	0.279061	0.320865	1.1498
Ld1S_050817200	hypothetical protein	5	2632.36	3175.99	1.20652	0.0815338	1357	839	1.6174	0.208818	2.60838e-11	5.53745e-10	0.318725	0.427268	1.34055
Ld1S_050817300	Vta1 like, putative	5	1364.32	1631.62	1.19593	0.0777043	897	666	1.34685	0.129318	9.42407e-07	7.215e-06	0.488157	0.54976	1.1262
Ld1S_050817400	Flavodoxin/Radical SAM superfamily/Wyosine base formation, putative	5	2896.42	3372.31	1.1643	0.0660655	1389	886	1.56772	0.195269	2.7403e-16	1.45087e-14	0.305895	0.411884	1.34649
Ld1S_050817500	kinesin-like protein	5	4617.4	5492.54	1.18953	0.0753756	3473	2821	1.23112	0.0903017	0.000979271	0.00344824	0.610949	0.632312	1.03497
Ld1S_050817600	hypothetical protein	5	4623.82	5712.86	1.23553	0.0918522	1550	809	1.91595	0.282383	1.37606e-21	1.57068e-19	0.174963	0.271318	1.55071
Ld1S_050817700	hypothetical protein	5	550.128	640.215	1.16376	0.0658625	1438	1135	1.26696	0.102763	1.26009e-05	7.4179e-05	2.06316	2.24612	1.08868
Ld1S_050817900	MYND zinc finger (ZnF) domain-like protein	5	1747.57	2179.13	1.24695	0.0958482	699	485	1.44124	0.158735	1.19525e-07	1.13691e-06	0.277528	0.32077	1.15581
Ld1S_050818100	hypothetical protein	5	3189.82	3915.46	1.22748	0.0890157	951	440	2.16136	0.334728	6.51224e-29	2.20139e-26	0.137939	0.242884	1.76081
Ld1S_050818200	methylthioadenosine phosphorylase, putative	5	1073.67	1264.07	1.17734	0.0709022	3332	2520	1.32222	0.121304	2.14092e-07	1.92595e-06	2.3471	2.63593	1.12306
Ld1S_050818300	hypothetical protein	5	4481.71	5982.25	1.33482	0.125421	2046	1657	1.23476	0.0915831	2.85492e-05	0.000154602	0.369725	0.342012	0.925043
Ld1S_050818400	zinc-finger of a C2HC-type, putative	5	2741.47	3350.5	1.22215	0.0871257	1293	743	1.74024	0.24061	1.47757e-21	1.66492e-19	0.271023	0.385913	1.42391
Ld1S_050818600	hypothetical protein	5	6467.67	8093.76	1.25142	0.0974026	1906	1287	1.48096	0.170544	1.28109e-10	2.26549e-09	0.19899	0.23549	1.18343
Ld1S_050818800	CPSF A subunit region, putative	5	6545.6	8115.57	1.23985	0.0933696	3368	1767	1.90606	0.280136	4.97652e-26	1.21496e-23	0.269952	0.415005	1.53733
Ld1S_050818900	surface antigen-like protein	5	1042.49	1202.99	1.15396	0.0621907	805	1095	0.73516	-0.133618	3.82662e-06	2.52874e-05	1.05037	0.669164	0.637076
Ld1S_050819000	hypothetical protein	5	3684.02	4453.15	1.20877	0.0823451	1142	789	1.4474	0.160589	1.87913e-13	5.83593e-12	0.214168	0.256448	1.19741
Ld1S_050819200	ubiquitin-conjugating enzyme E2, putative	5	1625.63	2019.9	1.24253	0.0943079	731	472	1.54873	0.189975	2.62058e-12	6.61846e-11	0.29035	0.3619	1.24643
Ld1S_050819300	syndrome nuclear autoantigen 1. Function unknown	5	4358.84	5355.12	1.22856	0.089398	1892	1450	1.30483	0.115553	3.12287e-07	2.70946e-06	0.332657	0.353307	1.06207
Ld1S_050819800	3-mercaptopyruvate sulfurtransferase	5	1290.97	1652.34	1.27993	0.107186	961	607	1.5832	0.199535	3.97814e-12	9.63192e-11	0.470191	0.581598	1.23694
Ld1S_050820200	methyltransferase-like protein	5	2218.85	2811.71	1.26719	0.102843	692	391	1.76982	0.247929	1.50607e-17	1.01044e-15	0.176218	0.246113	1.39665
Ld1S_050820300	Coiled-coil domain containing 135. Function unknown	5	2760.72	3395.21	1.22983	0.089844	1761	1352	1.30251	0.114783	2.02402e-05	0.000113379	0.489727	0.518672	1.0591
Ld1S_050820700	ATPase, putative	5	1494.51	2031.89	1.35957	0.133401	1555	1283	1.212	0.0835037	0.000126697	0.000571928	0.858473	0.765296	0.891462
Ld1S_050820900	Phosphatidylinositol 4-phosphate 5-kinase, putative	5	2439.82	3018.94	1.23736	0.0924969	1812	1410	1.28511	0.108939	4.57287e-05	0.000233397	0.577912	0.600211	1.03859
Ld1S_050821000	double-strand-break repair protein rad21 homolog, putative	5	2196.84	2785.54	1.26797	0.10311	1118	858	1.30303	0.114955	0.00128264	0.00435257	0.39056	0.401359	1.02765
Ld1S_050821100	methyltransferase domain containing protein, putative	5	981.978	1216.08	1.2384	0.092861	911	1175	0.775319	-0.110519	0.000260793	0.00110198	1.19656	0.749127	0.626065
Ld1S_050821400	hypothetical protein	5	2043.72	2720.1	1.33095	0.124162	392	247	1.58704	0.200589	1.68824e-06	1.21324e-05	0.120858	0.144113	1.19241
Ld1S_050821500	V-type proton ATPase subunit D, putative	5	1477.09	1525.83	1.03299	0.0140978	638	512	1.24609	0.0955507	0.000289604	0.00120575	0.346627	0.418134	1.20629
Ld1S_050821600	hypothetical protein	5	2930.35	3584.99	1.2234	0.0875686	485	388	1.25	0.09691	0.00160435	0.00527916	0.132408	0.135286	1.02174
Ld1S_050821700	DNA topoisomerase type IB small subunit. Replication, recombination and repair	5	674.823	738.374	1.09417	0.0390865	388	274	1.41606	0.151081	2.08951e-05	0.000116676	0.406032	0.525479	1.29418
Ld1S_050821800	elongation of very long chain fatty acids protein, putative	5	804.103	994.678	1.237	0.0923709	853	679	1.25626	0.0990793	0.000251707	0.00106924	0.844419	0.857564	1.01557
Ld1S_050821900	hypothetical protein	5	1708.15	2035.16	1.19145	0.0760744	725	515	1.40777	0.148531	3.41038e-07	2.92428e-06	0.301496	0.356237	1.18156
Ld1S_050822000	hypothetical protein	5	6236.61	7626.96	1.22293	0.0874025	1542	1029	1.49854	0.175669	4.31533e-11	8.86154e-10	0.164993	0.202178	1.22537
Ld1S_060830400	tRNA methyltransferase 61 homolog. Translation, ribosomal structure and biogenesis	6	871.035	989.225	1.13569	0.0552593	269	356	0.755618	-0.121698	0.00215082	0.00682932	0.408709	0.27193	0.665339
Ld1S_060830700	ATP-binding cassette protein subfamily G, member 2 (fragment);ATP-binding cassette protein subfamily G, member 3, putative;ATP-binding cassette protein subfamily G, member 1, putative (fragment)	6	1855.76	1702.51	0.91742	-0.037432	371	282	1.3156	0.119125	0.00189028	0.00609452	0.151959	0.217913	1.43403
Ld1S_060831000	cyclophilin	6	612.475	544.237	0.888587	-0.0513003	1931	2672	0.72268	-0.141054	2.56019e-06	1.75931e-05	4.36262	3.54808	0.813291
Ld1S_060832000	tRNA	6	193.462	175.596	0.907651	-0.0420809	66	116	0.568966	-0.244914	0.000309728	0.00128224	0.599602	0.375864	0.626855
Ld1S_060832600	5'-3' exoribonuclease A, putative	6	3975.59	4031.06	1.01395	0.00601834	1723	1458	1.18176	0.0725278	0.00312885	0.00943377	0.366738	0.42743	1.16549
Ld1S_060833100	folate/biopterin transporter, putative;biopterin transporter, putative;pteridine transporter, putative;folate/biopterin transporter, putative (fragment)	6	1848.43	1826.85	0.988325	-0.00510007	770	1400	0.55	-0.259637	6.34577e-14	2.18717e-12	0.7574	0.421491	0.556497
Ld1S_060833500	NAD(P)-dependent steroid dehydrogenase protein, putative	6	1012.23	1189.91	1.17552	0.0702313	1538	2153	0.714352	-0.146088	3.29508e-07	2.84484e-06	2.12698	1.29254	0.607688
Ld1S_060833700	glutamine synthetase, putative	6	920.547	1110.29	1.20612	0.0813897	3267	4588	0.712075	-0.147474	3.77984e-09	5.03018e-08	4.98399	2.94248	0.590386
Ld1S_060834200	hypothetical protein	6	617.06	667.482	1.08171	0.034112	505	621	0.813205	-0.0898002	0.00122136	0.0041801	1.00639	0.756575	0.751775
Ld1S_060834700	Zinc finger protein. Signal transduction mechanisms	6	1356.06	1259.71	0.928944	-0.0320105	1205	1700	0.708824	-0.149462	1.34216e-10	2.36873e-09	1.25363	0.956571	0.763042
Ld1S_060835000	hypothetical protein	6	1091.09	1050.3	0.96262	-0.016545	613	746	0.821716	-0.0852784	0.00260521	0.00805388	0.683722	0.583642	0.853624
Ld1S_060835400	Leucine-rich repeat protein. Function unknown	6	5122.6	5143.53	1.00409	0.00177077	828	1087	0.76173	-0.118199	3.55451e-07	3.03012e-06	0.212197	0.160979	0.75863
Ld1S_060835700	hypothetical protein	6	4884.22	4837.06	0.990345	-0.00421343	1108	897	1.23523	0.0917473	0.000832972	0.0030041	0.183653	0.229065	1.24727
Ld1S_060835800	deoxyuridine triphosphatase, putative	6	794.017	782	0.984865	-0.00662309	5756	6749	0.852867	-0.0691186	0.00129666	0.00439334	8.49981	7.36061	0.865973
Ld1S_060836300	carbonic anhydrase family protein, putative	6	964.557	838.715	0.869533	-0.0607138	714	888	0.804054	-0.0947148	3.67205e-05	0.000193024	0.92063	0.851303	0.924696
Ld1S_060836400	Putative Phosphatase/Protein of unknown function DUF89, putative	6	2928.51	2914.23	0.995124	-0.00212281	1415	970	1.45876	0.163985	7.54608e-15	3.26712e-13	0.331226	0.485548	1.46591
Ld1S_060836500	hypothetical protein	6	4748.52	4657.1	0.980748	-0.00844239	1983	2459	0.806425	-0.0934358	0.000325414	0.00133595	0.517846	0.425801	0.822255
Ld1S_060836700	lanosterol synthase, putative	6	2657.12	2521.6	0.948998	-0.0227349	1495	1930	0.774611	-0.110916	4.63592e-07	3.8469e-06	0.726351	0.592878	0.816242
Ld1S_060837200	hypothetical protein	6	6595.11	6543.94	0.99224	-0.00338316	2678	2038	1.31403	0.118606	4.25257e-08	4.53041e-07	0.309017	0.409234	1.32431
Ld1S_060837700	hypothetical protein	6	3005.53	2945.86	0.980147	-0.00870872	820	641	1.27925	0.106956	0.0015487	0.00512481	0.213274	0.278357	1.30516
Ld1S_060838600	lipin, putative	6	3750.04	3456.29	0.921668	-0.0354254	1347	1129	1.19309	0.0766737	0.00304064	0.00921205	0.301064	0.389724	1.29449
Ld1S_060838900	dihydrofolate reductase-thymidylate synthase	6	1461.51	1442.94	0.987296	-0.00555283	1356	1931	0.702227	-0.153523	1.02201e-07	9.87082e-07	1.32124	0.939749	0.711263
Ld1S_060839500	hypothetical protein	6	1250.62	1379.68	1.10319	0.0426518	525	408	1.28676	0.109499	0.00113371	0.0039198	0.326237	0.380523	1.1664
Ld1S_060839800	glucosamine-fructose-6-phosphate aminotransferase, putative	6	1720.07	1713.42	0.996137	-0.001681	665	844	0.787915	-0.103521	1.91025e-05	0.00010746	0.490679	0.388113	0.79097
Ld1S_060839900_pseudogene	cell cycle associated protein MOB1, putative	6	690.41	655.484	0.949413	-0.0225449	662	829	0.798552	-0.0976965	0.00128712	0.00436439	1.20074	1.00994	0.841101
Ld1S_060840000	Domain of unknown function (DUF3883), putative	6	4416.61	4506.59	1.02037	0.00875931	811	659	1.23065	0.0901354	0.00286495	0.00874609	0.14921	0.179959	1.20608
Ld1S_060840200	WD domain, G-beta repeat, putative	6	3362.2	3337.41	0.992627	-0.00321384	974	800	1.2175	0.085469	0.00128609	0.00436257	0.23794	0.291843	1.22654
Ld1S_060840900	protein disulfide isomerase	6	490.53	492.977	1.00499	0.0021603	1279	2024	0.631917	-0.19934	3.56734e-10	5.82776e-09	4.12615	2.59444	0.628781
Ld1S_060841100	deoxyribose-phosphate aldolase, putative	6	837.111	872.525	1.04231	0.0179949	747	930	0.803226	-0.0951623	0.000374222	0.00150116	1.11096	0.856136	0.770624
Ld1S_060841200	Staphylococcal nuclease homologue, putative	6	764.677	834.352	1.09112	0.037871	442	677	0.65288	-0.185166	7.87842e-08	7.85964e-07	0.885341	0.529752	0.59836
Ld1S_060842300	thioredoxin, putative	6	634.48	627.127	0.988411	-0.0050626	549	908	0.604626	-0.218514	5.1987e-08	5.44483e-07	1.43109	0.87542	0.611715
Ld1S_060843300	hypothetical protein	6	583.135	619.493	1.06235	0.0262669	338	508	0.665354	-0.176947	6.27261e-09	7.9127e-08	0.871153	0.545608	0.626305
Ld1S_060843400	folate/biopterin transporter, putative;biopterin transporter, putative;pteridine transporter, putative;folate/biopterin transporter, putative (fragment)	6	1761.33	1863.93	1.05826	0.0245903	2738	984	2.78252	0.444438	1.58387e-23	2.53102e-21	0.55867	1.46894	2.62935
Ld1S_060843500	coproporphyrinogen III oxidase	6	860.033	816.901	0.949849	-0.0223454	937	510	1.83725	0.264169	1.9594e-10	3.37009e-09	0.593001	1.14702	1.93426
Ld1S_060843600	protoporphyrinogen oxidase-like protein	6	717.917	679.479	0.946459	-0.0238981	352	130	2.70769	0.432599	2.70951e-21	3.01442e-19	0.18108	0.518044	2.86087
Ld1S_060843700	Cytochrome b5-like Heme/Steroid binding domain containing protein, putative	6	358.5	346.829	0.967444	-0.014374	162	39	4.15385	0.61845	2.82005e-15	1.27105e-13	0.108787	0.467089	4.29363
Ld1S_070844000_pseudogene	Isy1-like splicing family, putative	7	900.375	977.228	1.08536	0.0355722	440	586	0.750853	-0.124445	0.00118611	0.00407374	0.65084	0.450253	0.691804
Ld1S_070844100	histone-lysine N-methyltransferase, putative	7	869.202	889.975	1.0239	0.0102575	2891	4048	0.71418	-0.146192	7.34272e-09	9.15607e-08	4.65715	3.2484	0.697509
Ld1S_070844200	Peptidase dimerisation domain containing protein, putative	7	782.098	894.338	1.14351	0.0582405	1876	2423	0.774247	-0.111121	0.00013417	0.000602565	3.09808	2.09764	0.677078
Ld1S_070844300	hypothetical protein	7	926.048	880.159	0.950447	-0.0220722	837	1009	0.829534	-0.0811657	0.00165303	0.00541298	1.08958	0.950964	0.872783
Ld1S_070844800	cobalamin-dependent methionine synthase, putative	7	3422.71	3438.84	1.00471	0.00204163	3648	4439	0.821807	-0.0852303	0.00015217	0.000675127	1.29693	1.06082	0.817952
Ld1S_070844900	pitrilysin-like metalloprotease	7	2644.28	2871.7	1.086	0.0358313	1528	1274	1.19937	0.0789539	0.00121515	0.00416048	0.481795	0.532089	1.10439
Ld1S_070845000	mitochondrial calcium uptake 1, putative	7	1032.41	1014.31	0.982472	-0.00767979	516	639	0.807512	-0.0928512	0.00285284	0.00871521	0.618942	0.50872	0.821918
Ld1S_070845600	hypothetical protein	7	485.946	407.905	0.839405	-0.0760286	109	166	0.656627	-0.182682	0.000317635	0.00131065	0.341602	0.267219	0.782253
Ld1S_070845700	protein kinase, putative	7	3152.23	3080.01	0.97709	-0.0100655	623	908	0.686123	-0.163598	0.000160991	0.000710328	0.28805	0.202272	0.702211
Ld1S_070845800	hypothetical protein	7	5796.51	5829.56	1.0057	0.00246887	331	238	1.39076	0.143251	0.000325436	0.00133595	0.0410592	0.0567796	1.38287
Ld1S_070846100	hypothetical protein	7	952.638	1013.22	1.06359	0.0267758	227	297	0.76431	-0.116731	0.0021791	0.00690167	0.311766	0.224038	0.718611
Ld1S_070846700	acetylornithine deacetylase-like protein	7	1091.09	1017.58	0.932632	-0.0302897	688	964	0.713693	-0.146489	2.48771e-08	2.7924e-07	0.883523	0.676113	0.765246
Ld1S_070847100	paraflagellar rod protein, putative	7	2258.27	2183.49	0.966886	-0.0146247	1344	1680	0.8	-0.09691	9.34032e-07	7.16336e-06	0.743931	0.615527	0.827398
Ld1S_070847500	ATP-dependent DEAD H RNA helicase. RNA processing and modification	7	520.787	583.501	1.12042	0.0493811	738	534	1.38202	0.140515	0.000699694	0.00257521	1.02537	1.26478	1.23349
Ld1S_070847800_pseudogene	Protein of unknown function (DUF1674), putative	7	517.12	507.155	0.98073	-0.0084505	339	438	0.773973	-0.111274	0.000263582	0.00111249	0.846999	0.668435	0.78918
Ld1S_070847900	Zinc finger, C3HC4 type (RING finger), putative	7	2503.08	2509.6	1.0026	0.00112962	171	307	0.557003	-0.254142	1.08474e-07	1.03854e-06	0.122649	0.0681384	0.555556
Ld1S_070848400	hypothetical protein	7	383.256	338.103	0.882188	-0.0544389	743	1181	0.629128	-0.201261	2.44717e-05	0.000134258	3.08149	2.19755	0.713145
Ld1S_070848500	maoc family dehydratase-like protein	7	501.533	482.07	0.961193	-0.0171894	1417	2000	0.7085	-0.14966	4.40532e-10	7.05253e-09	3.98777	2.93941	0.737105
Ld1S_070849100	hypothetical protein	7	553.795	568.232	1.02607	0.0111764	159	344	0.462209	-0.335161	5.30132e-13	1.48386e-11	0.621168	0.279815	0.450466
Ld1S_070849200	Dynein heavy chain, N-terminal region 2, putative	7	12388	11662.4	0.941429	-0.0262123	2984	4131	0.722343	-0.141256	0.00037301	0.00149835	0.333469	0.255865	0.767284
Ld1S_070849400	60S ribosomal protein L7a, putative	7	842.612	773.275	0.917712	-0.0372936	675	1005	0.671642	-0.172862	9.68111e-05	0.000454526	1.19272	0.87291	0.731866
Ld1S_070849500	60S ribosomal protein L7a, putative	7	778.431	768.913	0.987773	-0.00534293	780	1105	0.705882	-0.151268	5.63946e-05	0.000281593	1.41952	1.01442	0.71462
Ld1S_070849800	hypothetical protein	7	2974.36	2665.56	0.896182	-0.047604	766	624	1.22756	0.0890442	0.00283305	0.00866678	0.209793	0.287369	1.36977
Ld1S_070850100	Nucleolar protein 54, putative	7	1454.17	1373.14	0.944274	-0.0249018	1036	734	1.41144	0.149664	5.37143e-06	3.44847e-05	0.504755	0.754477	1.49474
Ld1S_070850400	electron transfer flavoprotein-ubiquinone oxidoreductase, putative	7	1482.59	1288.06	0.868791	-0.0610845	1102	1368	0.805556	-0.0939045	6.54992e-05	0.000321965	0.922707	0.855547	0.927214
Ld1S_070851300	40S ribosomal protein S9, putative	7	584.052	514.79	0.88141	-0.0548218	3345	2201	1.51976	0.181776	2.7512e-06	1.87881e-05	3.7685	6.4978	1.72424
Ld1S_070851500	topoisomerase-related function protein-like protein	7	2673.62	2416.89	0.903978	-0.0438421	1123	910	1.23407	0.0913384	0.000346689	0.00140806	0.340362	0.464646	1.36515
Ld1S_070851600	centrin, putative	7	619.81	653.303	1.05404	0.0228558	527	766	0.68799	-0.162418	3.67015e-07	3.11661e-06	1.23586	0.80667	0.652719
Ld1S_070851800	HEAT-like repeat, putative	7	3546.49	3439.93	0.969953	-0.0132491	1416	1113	1.27224	0.104568	8.28773e-05	0.000395659	0.313831	0.411636	1.31165
Ld1S_070852200	Protein kinase domain containing protein, putative	7	386.923	379.548	0.98094	-0.00835756	106	150	0.706667	-0.150785	0.00244417	0.00762306	0.387674	0.279279	0.720397
Ld1S_070852800	flavoprotein subunit-like protein	7	1842.01	1680.7	0.912427	-0.0398017	2967	3624	0.818709	-0.0868706	8.51154e-05	0.000404805	1.96742	1.76533	0.897286
Ld1S_070853000	polyadenylate-binding protein 1. RNA processing and modification	7	940.718	839.805	0.892728	-0.049281	579	827	0.700121	-0.154827	9.04159e-07	6.95854e-06	0.879116	0.689446	0.784249
Ld1S_070853200	cytochrome b5-like protein	7	218.217	203.953	0.934631	-0.0293597	410	556	0.73741	-0.132291	0.000414666	0.00164019	2.54792	2.01027	0.788985
Ld1S_070853400	hypothetical protein	7	5383.92	5202.43	0.966291	-0.014892	422	738	0.571816	-0.242744	3.43521e-15	1.53259e-13	0.137075	0.0811159	0.591763
Ld1S_070853500_pseudogene	hypothetical protein	7	6335.64	6295.27	0.993628	-0.00277608	687	890	0.77191	-0.112433	0.000654891	0.00243067	0.140475	0.10913	0.77686
Ld1S_070853800	splicing factor ptsr1-like protein	7	1591.7	1542.19	0.968892	-0.0137247	1527	1203	1.26933	0.103573	0.000198723	0.00086123	0.755795	0.990152	1.31008
Ld1S_070854000	hypothetical protein	7	1753.99	1757.05	1.00174	0.000756218	789	1358	0.581001	-0.235823	3.58655e-20	3.38948e-18	0.774235	0.449049	0.579991
Ld1S_070854500_pseudogene	Radial spokehead-like protein, putative	7	1017.74	955.415	0.938765	-0.0274432	779	963	0.80893	-0.0920888	0.000304518	0.00126246	0.946218	0.815353	0.861697
Ld1S_070854700	hypothetical protein	7	5380.25	5133.72	0.954179	-0.0203703	1036	1235	0.838866	-0.0763072	0.00035447	0.0014337	0.229543	0.201803	0.87915
Ld1S_070855100	nucleolar RNA-binding protein, putative	7	897.625	861.618	0.959887	-0.01778	5097	3885	1.31197	0.117924	0.000350327	0.00141956	4.32809	5.91561	1.3668
Ld1S_070855500	peptidyl-prolyl cis-trans isomerase/rotamase, putative	7	365.835	400.271	1.09413	0.0390688	830	1293	0.641918	-0.19252	8.51381e-13	2.33109e-11	3.53438	2.0736	0.586693
Ld1S_070855700	hypothetical protein	7	629.896	623.855	0.99041	-0.00418506	406	589	0.689304	-0.161589	6.6056e-07	5.23976e-06	0.935075	0.650792	0.695978
Ld1S_070856300	hypothetical protein	7	2200.51	2291.47	1.04133	0.0175905	1833	2274	0.806069	-0.093628	0.000159046	0.000703728	1.0334	0.799924	0.774072
Ld1S_070856600	hypothetical protein	7	400.676	314.109	0.783947	-0.105713	278	400	0.695	-0.158015	2.16408e-05	0.000120456	0.998312	0.885043	0.88654
Ld1S_070856800	hypothetical protein	7	1062.66	1141.92	1.07458	0.0312389	1516	1910	0.793717	-0.100334	4.57258e-06	2.97472e-05	1.79737	1.32759	0.73863
Ld1S_080857400	adaptor complex protein (AP) 3 delta subunit 1, putative	8	2822.15	3036.39	1.07591	0.0317763	2763	3338	0.827741	-0.0821054	0.00241484	0.0075407	1.18278	0.909963	0.76934
Ld1S_080857700	hypothetical protein	8	616.143	680.569	1.10456	0.043191	1393	1742	0.799656	-0.097097	0.000119101	0.000541532	2.82727	2.04682	0.723956
Ld1S_080857900	phosphoglycerate mutase protein, putative	8	577.634	567.141	0.981835	-0.00796156	606	779	0.77792	-0.109065	0.00259076	0.00801766	1.3486	1.06852	0.792313
Ld1S_080858600	hypothetical protein	8	3062.38	3014.57	0.98439	-0.00683278	1613	1250	1.2904	0.110724	0.000598194	0.00224489	0.40818	0.535067	1.31086
Ld1S_080858900	GPI-GlcNAc transferase complex, PIG-H component, putative	8	1378.99	1422.22	1.03135	0.0134054	795	665	1.19549	0.0775455	0.0027476	0.00843181	0.482238	0.558987	1.15915
Ld1S_080859000	hypothetical protein	8	700.496	701.292	1.00114	0.000493262	1438	1886	0.76246	-0.117783	3.53012e-05	0.00018713	2.69238	2.0505	0.761595
Ld1S_080859600	ubiquitin-activating enzyme-like protein	8	2801.98	2918.6	1.04162	0.0177084	1077	921	1.16938	0.0679561	0.0022837	0.00719923	0.328696	0.369013	1.12266
Ld1S_080859900_pseudogene	hypothetical protein	8	400.676	450.441	1.1242	0.0508443	572	784	0.729592	-0.13692	7.10418e-06	4.43141e-05	1.95669	1.26987	0.648987
Ld1S_080860300	iron superoxide dismutase A, mitochondrial	8	632.647	554.053	0.87577	-0.0576097	2040	2575	0.792233	-0.101147	0.00159226	0.00524921	4.0702	3.68196	0.904613
Ld1S_080860600	mitochondrial associated ribonuclease, putative	8	803.186	703.473	0.875853	-0.0575687	1081	1617	0.668522	-0.174884	4.26609e-14	1.518e-12	2.01323	1.53666	0.763281
Ld1S_080861300	hypothetical protein	8	5167.53	4941.76	0.95631	-0.0194013	1560	1305	1.1954	0.0775141	0.000906435	0.00323322	0.252538	0.315677	1.25002
Ld1S_080861400	hypothetical protein	8	3196.24	3179.26	0.994688	-0.00231318	1123	888	1.26464	0.101967	5.8397e-05	0.000289645	0.277826	0.353227	1.27139
Ld1S_080861600	hypothetical protein	8	5025.42	4857.78	0.966643	-0.0147339	2138	1665	1.28408	0.108593	5.86966e-06	3.73559e-05	0.331316	0.440119	1.3284
Ld1S_080861700_pseudogene	hypothetical protein	8	2543.42	2503.06	0.984129	-0.00694812	1325	924	1.43398	0.156544	5.08636e-08	5.34099e-07	0.36329	0.529353	1.45711
Ld1S_080861800	hypothetical protein	8	6323.72	6046.6	0.956178	-0.0194614	2202	1572	1.40076	0.146365	2.64599e-12	6.64445e-11	0.248588	0.364172	1.46496
Ld1S_080862100	small ubiquitin protein, putative	8	403.427	316.29	0.784009	-0.105679	417	549	0.759563	-0.119436	0.000511819	0.00196607	1.36084	1.31841	0.968819
Ld1S_080862800	hypothetical protein	8	1044.33	966.321	0.925307	-0.0337144	826	1069	0.772685	-0.111998	3.80645e-06	2.51919e-05	1.02363	0.854788	0.835058
Ld1S_080863000	translation initiation factor-like protein	8	913.212	924.876	1.01277	0.00551216	3184	2555	1.24618	0.0955822	0.000133039	0.000598708	2.79782	3.44262	1.23047
Ld1S_080863200	hypothetical protein	8	636.314	570.413	0.896433	-0.0474821	182	302	0.602649	-0.219936	8.24884e-09	1.01397e-07	0.474608	0.319067	0.672274
Ld1S_080863400	hypothetical protein	8	1320.31	1141.92	0.864888	-0.0630402	286	484	0.590909	-0.228479	4.71655e-08	4.98242e-07	0.366582	0.250456	0.68322
Ld1S_080863500	hypothetical protein	8	404.344	400.271	0.989927	-0.00439688	90	150	0.6	-0.221849	1.77306e-05	0.000100733	0.370971	0.224848	0.606105
Ld1S_080865000	tuzin-like protein;tuzin, putative	8	1720.98	1598.9	0.929063	-0.0319547	659	817	0.80661	-0.0933366	0.000543269	0.00206791	0.474729	0.412158	0.868196
Ld1S_080865100	tuzin, putative (fragment)	8	1317.56	1191	0.903944	-0.0438585	704	935	0.752941	-0.123239	1.00113e-05	6.0308e-05	0.709647	0.591102	0.832951
Ld1S_080865200	amastin-like protein	8	745.423	646.759	0.86764	-0.0616602	201	268	0.75	-0.124939	0.00230487	0.00725815	0.359527	0.31078	0.864413
Ld1S_080866200	Beta-lactamase superfamily domain containing protein, putative	8	5841.44	5395.48	0.923655	-0.03449	1023	781	1.30986	0.117225	1.60342e-05	9.18076e-05	0.1337	0.189603	1.41813
Ld1S_080866500	protein kinase, putative	8	3220.08	3287.24	1.02086	0.00896439	755	985	0.766497	-0.115489	3.34364e-05	0.000178104	0.305893	0.229676	0.750838
Ld1S_080866700_pseudogene	hypothetical protein	8	492.364	490.795	0.996813	-0.00138612	442	649	0.681048	-0.166822	4.02992e-09	5.31705e-08	1.31813	0.900579	0.683225
Ld1S_080866800	Dpy-30 motif containing protein, putative	8	1574.28	1521.47	0.96645	-0.0148204	1125	1474	0.763229	-0.117345	9.72955e-05	0.000456313	0.9363	0.739419	0.789724
Ld1S_080867000	hypothetical protein	8	543.709	536.603	0.986929	-0.00571394	64	97	0.659794	-0.180592	0.000659822	0.00244073	0.178404	0.119269	0.668532
Ld1S_080867100	hypothetical protein	8	2920.26	2807.35	0.961335	-0.0171252	351	588	0.596939	-0.22407	6.03972e-10	9.32919e-09	0.201352	0.125029	0.620948
Ld1S_080868200	Ring finger domain containing protein, putative	8	973.726	1138.64	1.16937	0.0679516	495	696	0.711207	-0.148004	2.30317e-07	2.05926e-06	0.71478	0.434727	0.608197
Ld1S_080868300	hypothetical protein	8	992.98	953.233	0.959972	-0.0177414	7284	8263	0.88152	-0.0547678	0.001225	0.00418929	8.32141	7.64136	0.918277
Ld1S_080871000	protein kinase, putative	8	4669.67	5078.09	1.08746	0.0364149	1018	1537	0.662329	-0.178926	9.35892e-12	2.14207e-10	0.329146	0.200469	0.609058
Ld1S_080871100	beta tubulin (fragment)	8	2330.71	2413.62	1.03557	0.0151815	1597	2598	0.614704	-0.211334	3.12786e-14	1.15024e-12	1.11468	0.661661	0.593587
Ld1S_090871300	hypothetical protein	9	520.787	536.603	1.03037	0.0129924	147	246	0.597561	-0.223618	2.14801e-08	2.44545e-07	0.472362	0.273946	0.579949
Ld1S_090871400	WD repeat domain 74. Function unknown	9	1071.83	1158.28	1.08065	0.0336857	795	953	0.834208	-0.0787258	0.003089	0.00933926	0.889132	0.686364	0.771949
Ld1S_090871500	hypothetical protein	9	419.931	428.628	1.02071	0.00890272	2857	3420	0.83538	-0.0781159	0.00336145	0.0099945	8.1442	6.66546	0.81843
Ld1S_090872000	RNA-binding protein 5, putative	9	475.86	458.076	0.962626	-0.0165424	1897	2827	0.671029	-0.173258	9.62546e-09	1.1701e-07	5.94082	4.14124	0.697082
Ld1S_090872100	RNA helicase, putative	9	3293.43	3394.12	1.03057	0.0130789	1213	638	1.90125	0.27904	4.18209e-32	1.67074e-29	0.193719	0.357383	1.84485
Ld1S_090872300	RNA-binding protein 5-like protein	9	815.106	864.89	1.06108	0.0257471	225	460	0.48913	-0.310575	0.000353028	0.00142985	0.564344	0.260149	0.460975
Ld1S_090874100	hypothetical protein	9	529.956	479.889	0.905525	-0.0430995	206	307	0.67101	-0.173271	2.32079e-05	0.000128447	0.579293	0.429266	0.741017
Ld1S_090874300	Domain of unknown function (DUF4586), putative	9	950.804	888.885	0.934877	-0.0292455	675	947	0.712777	-0.147046	3.46492e-06	2.31583e-05	0.995999	0.759379	0.762429
Ld1S_090874900	integral membrane transport protein, putative	9	1763.16	1796.31	1.0188	0.00808996	632	473	1.33615	0.125856	1.65279e-05	9.43272e-05	0.268269	0.351832	1.31149
Ld1S_090875000	hypothetical protein	9	2151	2089.7	0.971501	-0.0125569	663	534	1.24157	0.0939723	0.00208351	0.00663238	0.248257	0.317271	1.27799
Ld1S_090875400	CHASE domain-containing protein	9	2590.18	2480.15	0.95752	-0.0188523	682	886	0.769752	-0.113649	0.0014197	0.00474982	0.342061	0.274983	0.803902
Ld1S_090876400	hypothetical protein	9	5426.09	5292.95	0.975463	-0.010789	924	754	1.22546	0.0883006	0.000656933	0.00243505	0.138958	0.174572	1.25629
Ld1S_090876700	tyrosine phosphatase, putative	9	3057.79	2952.41	0.965535	-0.0152319	614	442	1.38914	0.142746	1.33113e-05	7.76332e-05	0.144549	0.207966	1.43873
Ld1S_090877800	leucine-rich repeat protein, putative	9	2827.66	2801.9	0.99089	-0.00397462	1565	2232	0.701165	-0.15418	9.88059e-11	1.80167e-09	0.789346	0.55855	0.707611
Ld1S_090878100	Histidine phosphatase superfamily (branch 1), putative	9	940.718	879.069	0.934466	-0.0294367	694	955	0.726702	-0.138644	4.62553e-10	7.37763e-09	1.01518	0.789472	0.777665
Ld1S_090878500	cyclin 1	9	1025.07	995.769	0.971415	-0.0125954	2194	4185	0.524253	-0.280459	8.6807e-39	8.47719e-36	4.08264	2.20332	0.53968
Ld1S_090878600	Glucosidase II beta subunit-like, putative	9	2320.62	2231.48	0.961588	-0.0170109	2353	3007	0.782507	-0.106512	5.1645e-09	6.66532e-08	1.29577	1.05446	0.813766
Ld1S_090878900	palmitoyl acyltransferase 5, putative	9	1449.59	1355.69	0.935222	-0.0290851	1585	1989	0.796883	-0.0986055	2.44711e-05	0.000134258	1.37212	1.16915	0.852078
Ld1S_090879100	Methyltransferase TYW3, putative	9	1100.26	1060.12	0.96352	-0.0161393	660	839	0.786651	-0.104218	0.00287122	0.00876102	0.76255	0.622572	0.816434
Ld1S_090881100	DEAD/DEAH box helicase-like protein	9	2334.37	2328.55	0.997505	-0.00108487	1387	1155	1.20087	0.0794945	0.00156135	0.00516279	0.494779	0.595649	1.20387
Ld1S_090881400	hypothetical protein	9	486.863	437.353	0.898308	-0.0465745	361	571	0.632224	-0.199129	6.45019e-09	8.12188e-08	1.17281	0.82542	0.703794
Ld1S_090881500	Translation initiation factor IF-2. Translation, ribosomal structure and biogenesis	9	1668.72	1537.83	0.921559	-0.0354766	625	482	1.29668	0.112833	0.000266393	0.00112294	0.288844	0.406418	1.40705
Ld1S_090881800	ubiquitin-fusion protein	9	468.525	468.982	1.00097	0.000423203	402	541	0.743068	-0.128971	1.43189e-05	8.29046e-05	1.15469	0.857176	0.742345
Ld1S_090882000	calmodulin, putative	9	494.198	528.968	1.07036	0.0295286	349	623	0.560193	-0.251663	2.1821e-15	1.00411e-13	1.26063	0.659775	0.52337
Ld1S_090882200	calmodulin, putative	9	527.206	490.795	0.930937	-0.0310797	599	843	0.710558	-0.148401	6.00873e-07	4.80972e-06	1.599	1.22047	0.763271
Ld1S_090882300	translation-associated element 2, putative	9	3529.99	3169.45	0.897864	-0.0467895	1867	1432	1.30377	0.115201	1.21008e-05	7.15708e-05	0.405667	0.589062	1.45208
Ld1S_090882500	hypothetical protein	9	1913.53	1776.68	0.928484	-0.0322257	1122	885	1.2678	0.10305	0.000845843	0.00304178	0.462497	0.631515	1.36545
Ld1S_090883100	PUB domain containing protein, putative	9	858.199	855.074	0.996359	-0.00158414	531	825	0.643636	-0.191359	1.59388e-09	2.28525e-08	0.961315	0.620999	0.645988
Ld1S_090883800	hypothetical protein	9	343.83	313.018	0.910387	-0.0407737	261	347	0.752161	-0.123689	0.000735249	0.00269366	1.00922	0.833817	0.826199
Ld1S_090884400_pseudogene	LEM3 (ligand-effect modulator 3) family / CDC50 family, putative	9	1650.38	1635.98	0.991276	-0.0038056	875	1048	0.834924	-0.0783532	0.00213617	0.0067877	0.635004	0.534846	0.842272
Ld1S_090885600	heat shock protein family B (small), member 11. Function unknown	9	667.488	657.666	0.985284	-0.00643842	689	845	0.815385	-0.0886375	0.000732158	0.00268346	1.26594	1.04764	0.827563
Ld1S_090886300	Zinc finger, C3HC4 type (RING finger), putative	9	1200.2	1352.41	1.12683	0.0518577	859	1040	0.825962	-0.0830402	0.000483534	0.00187794	0.866526	0.635161	0.732997
Ld1S_090886400	AAA family ATPase, putative	9	3607	3688.6	1.02262	0.00971489	1729	1332	1.29805	0.113291	8.77136e-06	5.35729e-05	0.369282	0.468742	1.26933
Ld1S_090886600	ATP-dependent helicase, putative (fragment)	9	6210.02	6152.39	0.990719	-0.00404933	1692	1283	1.31878	0.120174	5.21874e-06	3.35534e-05	0.206601	0.275015	1.33114
Ld1S_090886900	mitochondrial carrier protein, putative	9	1100.26	978.318	0.889174	-0.0510132	793	1124	0.705516	-0.151493	5.76318e-10	8.9969e-09	1.02158	0.810574	0.793451
Ld1S_090887300	PPPDE putative peptidase domain containing protein, putative	9	781.181	716.561	0.917279	-0.0374986	188	264	0.712121	-0.147446	0.000639722	0.00238261	0.33795	0.262364	0.776341
Ld1S_090887400	hypothetical protein	9	1111.26	1059.03	0.952999	-0.0209077	1034	1265	0.817391	-0.08757	0.000919875	0.00327452	1.13835	0.976368	0.857705
Ld1S_090887500	paraflagellar rod component, putative	9	1643.96	1688.34	1.02699	0.0115663	1240	1540	0.805195	-0.094099	0.00021852	0.000941456	0.93676	0.734451	0.784034
Ld1S_090888400	SET domain containing protein, putative	9	1707.23	1588	0.930159	-0.0314427	459	373	1.23056	0.0901039	0.0031203	0.00942416	0.218483	0.289044	1.32296
Ld1S_090888700	DnaJ domain containing protein, putative	9	1160.77	1172.46	1.01007	0.00435041	627	507	1.23669	0.0922596	0.00160376	0.00527916	0.436779	0.534775	1.22436
Ld1S_090888900	Rhodanese-like domain containing protein, putative	9	540.959	567.141	1.0484	0.020527	1010	1285	0.785992	-0.104582	0.000350247	0.00141956	2.37541	1.78086	0.749706
Ld1S_090889000	Rhodanese-like domain containing protein, putative	9	394.258	460.257	1.1674	0.0672196	703	875	0.803429	-0.0950527	0.000321015	0.00132088	2.21936	1.52741	0.688221
Ld1S_090889100	J-binding protein	9	2360.96	2198.76	0.931299	-0.0309111	2020	2569	0.786298	-0.104413	1.6032e-05	9.18076e-05	1.08811	0.918699	0.844303
Ld1S_090889200	cytochrome b5-like, putative	9	389.674	459.166	1.17834	0.0712688	650	1016	0.639764	-0.19398	2.10038e-12	5.36634e-11	2.60731	1.41561	0.542939
Ld1S_090889700	Radial spoke protein 11	9	551.044	567.141	1.02921	0.0125045	536	858	0.624709	-0.204322	5.83868e-11	1.14545e-09	1.55704	0.945091	0.606978
Ld1S_090889800	hypothetical protein	9	1844.76	1908.65	1.03463	0.0147857	634	790	0.802532	-0.0955378	0.00126627	0.00430866	0.42824	0.332172	0.775669
Ld1S_090889900	hypothetical protein	9	593.221	535.512	0.90272	-0.0444471	493	674	0.731454	-0.135813	5.729e-05	0.000284927	1.13617	0.920614	0.810278
Ld1S_100013900_pseudogene	FAD binding domain containing protein, putative	10	1253.37	1317.51	1.05117	0.0216741	521	1046	0.498088	-0.302694	1.14099e-20	1.16607e-18	0.834547	0.395442	0.47384
Ld1S_100014200	thymidylate kinase-like protein	10	868.285	939.055	1.08151	0.0340288	925	1153	0.802255	-0.0956876	0.00011622	0.000532286	1.32791	0.985033	0.741794
Ld1S_100015000	DEAD/DEAH box helicase, putative	10	2092.32	2106.06	1.00657	0.00284228	993	838	1.18496	0.0737052	0.00234752	0.00737828	0.400513	0.471497	1.17723
Ld1S_100015200	hypothetical protein	10	1452.34	1486.56	1.02357	0.0101163	579	411	1.40876	0.148837	1.5182e-05	8.74409e-05	0.282992	0.389489	1.37632
Ld1S_100015400	leucine-rich repeat protein, putative	10	705.08	656.575	0.931206	-0.0309542	423	556	0.760791	-0.118734	0.000116619	0.000533279	0.788563	0.644252	0.816996
Ld1S_100015800	Mitogen-activated protein kinase 10, putative	10	1112.17	1089.57	0.979671	-0.00891967	743	975	0.762051	-0.118016	5.38962e-05	0.000270682	0.876661	0.681923	0.777864
Ld1S_100015900	hypothetical protein	10	540.042	463.529	0.85832	-0.0663507	258	342	0.754386	-0.122406	0.00158645	0.00523398	0.633284	0.5566	0.87891
Ld1S_100016300	Amastin surface glycoprotein, putative	10	1277.21	1261.89	0.988002	-0.00524211	679	847	0.801653	-0.0960136	0.00259832	0.00803645	0.663163	0.538082	0.811388
Ld1S_100016400	Amastin surface glycoprotein, putative	10	1049.83	1003.4	0.95578	-0.019642	450	657	0.684932	-0.164353	1.4179e-05	8.22569e-05	0.625818	0.448474	0.71662
Ld1S_100016600	pterin 4 alpha carbinolamine dehydratase, putative	10	915.046	785.272	0.858178	-0.0664224	467	583	0.801029	-0.0963517	0.000967679	0.00341426	0.637127	0.594698	0.933406
Ld1S_100016700	COPI associated protein, putative	10	387.84	349.01	0.899881	-0.0458147	1814	2380	0.762185	-0.11794	0.000949454	0.00336345	6.13655	5.19756	0.846984
Ld1S_100016800	exonuclease, putative	10	2580.1	2387.45	0.925331	-0.0337027	1110	899	1.23471	0.0915633	0.000271075	0.00113668	0.348436	0.464932	1.33434
Ld1S_100017200	protein transport protein SEC23, putative	10	2267.44	2196.58	0.968748	-0.013789	1053	846	1.24468	0.095058	0.000678122	0.0025021	0.373108	0.479381	1.28483
Ld1S_100017500	folate/biopterin transporter, putative;biopterin transporter, putative;pteridine transporter, putative;folate/biopterin transporter, putative (fragment)	10	1897.94	1929.37	1.01656	0.00713313	533	779	0.684211	-0.16481	5.56653e-08	5.76937e-07	0.410445	0.276256	0.673064
Ld1S_100017700_pseudogene	pteridine transporter (truncated), putative	10	1489.01	1524.74	1.02399	0.0102968	390	604	0.645695	-0.189972	1.44254e-08	1.69047e-07	0.405638	0.255782	0.630566
Ld1S_100017900	pteridine transporter (truncated), putative	10	1878.69	1753.77	0.933512	-0.0298803	548	715	0.766434	-0.115525	0.00017625	0.000771445	0.380585	0.312469	0.821022
Ld1S_100018300	Eukaryotic translation initiation factor 4 gamma. Translation, ribosomal structure and biogenesis	10	1707.23	1615.26	0.94613	-0.024049	680	488	1.39344	0.144089	7.56266e-06	4.68416e-05	0.285843	0.420984	1.47278
Ld1S_100018400	Zinc finger, C3HC4 type (RING finger), putative	10	420.848	495.158	1.17657	0.0706188	253	397	0.63728	-0.19567	1.65003e-08	1.91826e-07	0.943334	0.510948	0.541641
Ld1S_100018700	4F5 protein family/Zinc-binding, putative	10	348.414	364.279	1.04553	0.0193385	474	657	0.721461	-0.141787	5.88005e-08	6.05858e-07	1.88569	1.3012	0.69004
Ld1S_100018800	GP63, leishmanolysin (fragment)	10	2160.17	2123.51	0.983029	-0.00743369	142	481	0.295218	-0.529857	6.93191e-42	1.01541e-38	0.222668	0.0668705	0.300315
Ld1S_100018900	GP63, leishmanolysin (fragment)	10	3187.99	3122.55	0.979473	-0.0090077	75	157	0.477707	-0.320838	1.27211e-11	2.82338e-10	0.0492473	0.0240188	0.487719
Ld1S_100019100	GP63, leishmanolysin (fragment)	10	2446.23	2448.52	1.00094	0.000406167	198	98	2.02041	0.305439	5.55489e-09	7.11799e-08	0.0400616	0.0808651	2.01852
Ld1S_100020000	GP63, leishmanolysin (fragment)	10	2587.43	2624.12	1.01418	0.00611426	113	214	0.528037	-0.277335	2.20907e-10	3.77e-09	0.0827074	0.0430621	0.520655
Ld1S_100020200	GP63, leishmanolysin (fragment)	10	1923.61	2005.72	1.04268	0.0181519	127	190	0.668421	-0.17495	5.02783e-05	0.000253817	0.0987725	0.063319	0.641059
Ld1S_100020600	mitogen-activated protein kinase 3, putative	10	1015.9	1063.39	1.04674	0.0198405	1019	1257	0.81066	-0.0911611	0.000841226	0.00302642	1.23732	0.958256	0.774459
Ld1S_100020900	hypothetical protein	10	406.178	418.812	1.03111	0.0133031	10	29	0.344828	-0.462398	0.000139528	0.000623443	0.0713974	0.0238771	0.334425
Ld1S_100021000	hypothetical protein	10	2338.04	2279.47	0.974949	-0.0110182	607	481	1.26195	0.101044	0.000461108	0.001806	0.205728	0.26629	1.29438
Ld1S_100021100	hypothetical protein	10	3021.12	2988.4	0.98917	-0.00472921	1296	949	1.36565	0.135339	6.49599e-06	4.09271e-05	0.314122	0.433677	1.3806
Ld1S_100021200	hypothetical protein	10	2834.99	2822.62	0.995636	-0.00189957	1854	1451	1.27774	0.106442	0.00034472	0.00140331	0.511818	0.656837	1.28334
Ld1S_100021500	zinc-binding dehydrogenase-like protein	10	1293.72	1098.29	0.848942	-0.0711219	474	365	1.29863	0.113485	9.30298e-05	0.000438412	0.282133	0.43158	1.5297
Ld1S_100021600_pseudogene	chromatin assembly factor 1 subunit A, putative	10	2048.31	1898.83	0.927025	-0.0329088	864	643	1.3437	0.128303	3.78842e-05	0.000198429	0.313918	0.455017	1.44948
Ld1S_100021700	hypothetical protein	10	824.275	718.742	0.87197	-0.0594986	497	620	0.801613	-0.0960353	0.000388847	0.00155147	0.752177	0.691486	0.919313
Ld1S_100022200	C3H1-type domain-containing protein	10	767.428	731.83	0.953614	-0.0206273	586	729	0.803841	-0.0948299	0.000425493	0.00167773	0.949926	0.800732	0.842941
Ld1S_100022800	RNA recognition motif. (a.k.a. RRM, RBD, or RNP domain), putative	10	2747.89	2636.12	0.959325	-0.0180344	711	537	1.32402	0.121895	1.02644e-05	6.17902e-05	0.195423	0.269715	1.38016
Ld1S_100023300	hypothetical protein	10	548.294	499.52	0.911045	-0.0404601	849	1217	0.697617	-0.156383	1.03182e-07	9.94375e-07	2.21961	1.69963	0.765733
Ld1S_100023600	hypothetical protein	10	1534.86	1628.35	1.06091	0.02568	595	745	0.798658	-0.0976393	0.00237962	0.00745614	0.485388	0.365401	0.752802
Ld1S_100024400	nuclear transport factor 2, putative	10	375.921	332.65	0.884895	-0.0531084	1316	1556	0.845758	-0.0727537	0.00175986	0.00572445	4.13917	3.95611	0.955773
Ld1S_100025000	small GTP-binding protein Rab11, putative	10	719.75	664.21	0.922833	-0.0348767	1068	1331	0.802404	-0.0956068	3.3319e-05	0.000177695	1.84925	1.60793	0.869501
Ld1S_100025100	hypothetical protein	10	671.156	657.666	0.9799	-0.00881812	608	830	0.73253	-0.135175	4.74331e-08	4.99868e-07	1.23667	0.924482	0.747556
Ld1S_100026200	histone H3	10	463.941	410.087	0.88392	-0.053587	2825	3710	0.761456	-0.118355	0.000261351	0.0011038	7.99671	6.88879	0.861453
Ld1S_100026400	nucleoside phosphorylase-like protein	10	939.801	929.239	0.988761	-0.00490862	516	650	0.793846	-0.100264	0.00107775	0.00375441	0.691636	0.555293	0.80287
Ld1S_100026500	carrier protein, putative	10	1089.25	1216.08	1.11644	0.0478341	456	567	0.804233	-0.0946182	0.00127205	0.00432328	0.52054	0.374975	0.720357
Ld1S_100026600	RNA-binding protein-like protein	10	1049.83	1088.47	1.03681	0.0157007	684	538	1.27138	0.104274	0.000162197	0.000714563	0.512465	0.628402	1.22623
Ld1S_100026700	Domain of Unknown Function (DUF1042), putative	10	3275.09	3268.7	0.998047	-0.00084906	1162	955	1.21675	0.0852028	0.00322989	0.00969849	0.291595	0.355493	1.21914
Ld1S_100026900	hypothetical protein	10	968.225	983.772	1.01606	0.00691827	478	360	1.32778	0.123125	0.000167732	0.000736728	0.371815	0.485885	1.30679
Ld1S_100027300	hypothetical protein	10	465.775	503.883	1.08182	0.0341539	726	1017	0.713864	-0.146384	3.69144e-06	2.45231e-05	2.18346	1.44081	0.659875
Ld1S_100027900	Zinc finger, C3HC4 type (RING finger), putative	10	1007.65	1016.49	1.00877	0.00379387	769	986	0.779919	-0.107951	3.86802e-05	0.000201997	0.978514	0.756524	0.773135
Ld1S_100028400	flagellar protofilament ribbon protein-like protein	10	1067.25	1036.12	0.970837	-0.0128537	1499	1916	0.782359	-0.106594	1.5744e-05	9.03813e-05	1.79527	1.44674	0.80586
Ld1S_100028900_pseudogene	hypothetical protein	10	815.106	846.349	1.03833	0.0163356	1142	1433	0.79693	-0.0985801	5.39566e-05	0.000270831	1.75805	1.34932	0.76751
Ld1S_100029000	kinetoplastid kinetochore protein 20	10	690.41	703.473	1.01892	0.00814039	351	543	0.646409	-0.189493	3.52275e-08	3.82713e-07	0.786489	0.498953	0.634405
Ld1S_100029500	Protein of unknown function (DUF1861), putative	10	944.386	948.871	1.00475	0.00205768	1275	1718	0.742142	-0.129513	7.37195e-05	0.000356945	1.81917	1.3437	0.738634
Ld1S_110030500	hypothetical protein	11	556.546	606.405	1.08959	0.0372617	109	246	0.443089	-0.353509	7.17023e-17	4.17345e-15	0.442012	0.179748	0.406658
Ld1S_110030600	Endoplasmic Reticulum-Golgi Intermediate Compartment (ERGIC)/Endoplasmic reticulum vesicle transporter, putative	11	946.219	1033.94	1.09271	0.0385043	596	812	0.73399	-0.13431	3.66832e-07	3.11661e-06	0.858152	0.576435	0.671716
Ld1S_110030700	Bacterial transferase hexapeptide (six repeats), putative	11	806.854	897.61	1.11248	0.0462928	835	1162	0.718589	-0.14352	6.03955e-09	7.63764e-08	1.44016	0.930248	0.645933
Ld1S_110030800	ATP-binding cassette protein subfamily H, member 1, putative	11	881.121	952.143	1.0806	0.0336665	976	1191	0.819479	-0.0864619	0.000361587	0.00145846	1.35169	1.02506	0.758353
Ld1S_110031000	protein kinase, putative	11	2886.34	2924.05	1.01307	0.00563774	1721	1416	1.2154	0.0847176	0.00332131	0.00991206	0.490587	0.588567	1.19972
Ld1S_110031400	seryl-tRNA synthetase	11	1261.63	1337.14	1.05986	0.0252477	2494	3291	0.757824	-0.120431	6.42137e-08	6.53968e-07	2.60854	1.86517	0.715024
Ld1S_110031600	hypothetical protein	11	584.969	622.765	1.06461	0.0271911	384	285	1.34737	0.129486	0.000440633	0.00173199	0.487205	0.616605	1.2656
Ld1S_110031900	listerin E3 ubiquitin protein ligase 1. Posttranslational modification, protein turnover, chaperones	11	2489.33	2404.9	0.966083	-0.0149856	979	819	1.19536	0.0774988	0.00313634	0.00944989	0.329005	0.407086	1.23733
Ld1S_110032100	myotubularin-associated protein, putative	11	1781.5	1858.48	1.04321	0.0183724	787	639	1.23161	0.0904739	0.00078965	0.00286668	0.358687	0.423465	1.1806
Ld1S_110032200	cytoplasmic translation machinery associated protein, putative	11	546.46	499.52	0.914102	-0.0390051	604	741	0.815115	-0.0887813	0.00329284	0.00984714	1.356	1.20916	0.89171
Ld1S_110032600	pterin-4-alpha-carbinolamine dehydratase, putative	11	445.603	464.619	1.04268	0.018149	446	684	0.652047	-0.185721	2.66145e-05	0.000145109	1.535	0.959925	0.62536
Ld1S_110032800	proteasome alpha 7 subunit, putative	11	749.09	805.995	1.07596	0.031798	2144	2743	0.781626	-0.107001	3.81017e-06	2.51976e-05	3.66177	2.66007	0.726442
Ld1S_110032900	serine/threonine protein kinase, putative	11	2559.93	2508.51	0.979914	-0.00881193	528	668	0.790419	-0.102143	0.00315652	0.00948519	0.260945	0.210484	0.806621
Ld1S_110033400	hypothetical protein	11	1339.56	1332.78	0.994939	-0.00220336	1083	1342	0.807004	-0.0931241	0.000740282	0.00271097	1.00182	0.812586	0.811109
Ld1S_110033700	PIF1 helicase-like protein, putative	11	3196.24	3073.47	0.961588	-0.0170107	1241	1481	0.837947	-0.0767833	0.00246793	0.00768369	0.463357	0.403778	0.87142
Ld1S_110033800	PIF1 helicase-like protein, putative	11	2676.37	2675.38	0.99963	-0.000160899	914	1129	0.809566	-0.0917477	0.00117905	0.00405266	0.42184	0.341634	0.809866
Ld1S_110034000	14-3-3 protein 2, putative	11	752.758	683.841	0.908448	-0.0417	3069	4525	0.678232	-0.168622	1.06207e-08	1.28574e-07	6.01123	4.48788	0.746583
Ld1S_110034600	Nucleolar protein 89, putative	11	2296.78	2224.94	0.96872	-0.0138019	1324	893	1.48264	0.171037	4.68621e-07	3.87097e-06	0.388805	0.595073	1.53052
Ld1S_110034700	regulator of chromatin condensation, putative	11	2157.42	2126.78	0.985799	-0.00621167	750	551	1.36116	0.13391	2.64623e-06	1.81276e-05	0.255398	0.352646	1.38077
Ld1S_110035200	pumilio-repeat, RNA-binding protein, putative	11	2111.57	2152.96	1.0196	0.00842886	1096	663	1.65309	0.218297	6.37121e-13	1.77767e-11	0.313984	0.509068	1.62132
Ld1S_110036000	mRNA cap guanine-N7 methyltransferase, putative	11	2879.92	2746.27	0.953594	-0.0206366	1680	1051	1.59848	0.203707	8.13105e-13	2.23324e-11	0.364941	0.611738	1.67627
Ld1S_110036200	hypothetical protein	11	451.105	416.631	0.923579	-0.0345261	627	795	0.788679	-0.1031	0.000179486	0.000784048	1.76234	1.50493	0.853938
Ld1S_110036500	Pseudouridylate synthase 10. Translation, ribosomal structure and biogenesis	11	1941.03	1616.35	0.832728	-0.079497	365	239	1.5272	0.183895	1.39145e-06	1.01658e-05	0.12313	0.225817	1.83397
Ld1S_110036600	Protein of unknown function (DUF563), putative	11	1811.75	1819.21	1.00412	0.00178475	1466	2063	0.710616	-0.148365	2.70133e-11	5.72097e-10	1.13868	0.805842	0.707701
Ld1S_110037100	cytochrome b5, putative	11	519.871	495.158	0.952464	-0.0211516	356	531	0.670433	-0.173645	8.01377e-08	7.96754e-07	1.02141	0.718963	0.703894
Ld1S_110037300	Nucleolar protein 47, putative	11	1578.87	1409.13	0.892493	-0.049395	942	735	1.28163	0.107764	7.65169e-06	4.73263e-05	0.465524	0.668499	1.43601
Ld1S_110038500	Ankyrin repeats (3 copies)/Ankyrin repeats (many copies), putative	11	790.35	738.374	0.934237	-0.0295429	426	535	0.796262	-0.0989442	0.00119992	0.00411315	0.676915	0.576943	0.852312
Ld1S_110038800	PUF nine target 1	11	1832.84	1576	0.859866	-0.0655693	3685	4597	0.80161	-0.096037	0.000810294	0.00293194	2.50813	2.3382	0.93225
Ld1S_110039400	hypothetical protein	11	640.899	638.034	0.99553	-0.00194566	660	811	0.81381	-0.0894769	0.00121449	0.00415985	1.26541	1.03443	0.817464
Ld1S_110039500	hypothetical protein	11	528.122	556.235	1.05323	0.0225233	437	630	0.693651	-0.158859	0.000920401	0.00327506	1.19291	0.78564	0.658594
Ld1S_110040000_pseudogene	Alpha/beta hydrolase family, putative	11	1290.97	1312.06	1.01634	0.00703862	944	1111	0.849685	-0.0707421	0.00137237	0.0046249	0.860596	0.71948	0.836025
Ld1S_110040300	START domain containing protein, putative	11	1122.26	1109.2	0.98836	-0.00508482	1232	1656	0.743961	-0.12845	1.5416e-06	1.11607e-05	1.47559	1.11071	0.752723
Ld1S_110040400	hypothetical protein	11	1142.43	1060.12	0.927948	-0.0324761	2661	3564	0.746633	-0.126893	0.000142298	0.000633884	3.11966	2.5101	0.804606
Ld1S_110040500	Leucine Rich repeat, putative	11	2530.59	2421.26	0.956796	-0.0191805	1597	1856	0.860453	-0.0652731	0.00290362	0.00883961	0.733427	0.659575	0.899306
Ld1S_110040700	ATPase, putative	11	4309.33	4004.89	0.929352	-0.0318195	1328	917	1.4482	0.160829	2.63177e-12	6.62769e-11	0.212794	0.331595	1.55829
Ld1S_110041100	5S(MS) ribosomal RNA	11	134.781	117.791	0.873941	-0.0585179	15	38	0.394737	-0.403692	7.00203e-05	0.000341325	0.281938	0.127344	0.451675
Ld1S_110041200	hypothetical protein	11	1065.41	964.14	0.904944	-0.0433782	632	781	0.809219	-0.091934	0.00161856	0.00531795	0.733049	0.655506	0.89422
Ld1S_110041600	40S ribosomal protein S5 (fragment)	11	623.478	555.144	0.890399	-0.0504155	4196	7130	0.588499	-0.230254	3.6017e-08	3.89844e-07	11.4358	7.5584	0.660939
Ld1S_110041900	pyruvate phosphate dikinase, putative	11	2456.32	2325.28	0.946652	-0.0238099	6189	8589	0.720573	-0.142322	3.81519e-10	6.17526e-09	3.49669	2.66162	0.761181
Ld1S_110042100	hypothetical protein	11	3087.13	3178.17	1.02949	0.0126221	677	957	0.707419	-0.150323	5.64353e-08	5.84228e-07	0.309996	0.213016	0.687155
Ld1S_110042200_pseudogene	hypothetical protein	11	848.113	759.097	0.895041	-0.0481568	1875	1548	1.21124	0.0832303	3.3385e-05	0.000177939	1.82523	2.47004	1.35328
Ld1S_110042300	hypothetical protein	11	2268.36	2175.86	0.959221	-0.0180811	514	689	0.746009	-0.127256	0.000350049	0.00141956	0.303744	0.236229	0.777723
Ld1S_110042400	protein transport protein SEC61 subunit alpha, putative	11	1215.78	1192.09	0.980511	-0.00854771	2138	2522	0.84774	-0.0717374	0.000683283	0.00252009	2.07439	1.79349	0.86459
Ld1S_110042500	hypothetical protein	11	766.511	714.38	0.931989	-0.0305893	170	280	0.607143	-0.216709	7.21143e-07	5.66916e-06	0.365292	0.237969	0.651449
Ld1S_110042600	hypothetical protein	11	1165.35	1125.56	0.96585	-0.0150902	357	612	0.583333	-0.234083	5.93681e-10	9.22228e-09	0.525162	0.317176	0.603958
Ld1S_110042700	hypothetical protein	11	1284.55	1348.05	1.04944	0.020956	348	445	0.782022	-0.106781	0.000613743	0.00230029	0.346425	0.25815	0.745184
Ld1S_110042800	hypothetical protein	11	450.188	454.804	1.01025	0.00443021	145	242	0.599174	-0.222447	5.23009e-08	5.45929e-07	0.537554	0.318819	0.593092
Ld1S_110042900	hypothetical protein	11	702.33	682.751	0.972123	-0.0122788	261	343	0.760933	-0.118654	0.00143639	0.00479471	0.488375	0.382277	0.782754
Ld1S_110043000	zinc finger domain protein, putative	11	1456	1448.39	0.994771	-0.00227678	1102	1293	0.852282	-0.0694169	0.00284167	0.00869014	0.888047	0.760844	0.856761
Ld1S_110043200	Lanosterol 14-alpha demethylase	11	1254.29	1121.19	0.893887	-0.0487173	1584	2320	0.682759	-0.165733	1.48727e-13	4.77066e-12	1.84965	1.41278	0.763809
Ld1S_110043400	hypothetical protein	11	954.471	876.887	0.918715	-0.036819	742	949	0.781876	-0.106862	0.00303807	0.00920746	0.994268	0.846175	0.851053
Ld1S_110044200_pseudogene	ATP-binding cassette subfamily A, member 1, putative	11	4660.5	4546.95	0.975635	-0.0107126	612	894	0.684564	-0.164586	1.45741e-06	1.06036e-05	0.191825	0.134596	0.70166
Ld1S_110044900_pseudogene	ATP-binding cassette subfamily A, member 1, putative	11	10823.8	11382.1	1.05158	0.0218437	1418	2087	0.679444	-0.167846	2.88243e-08	3.19063e-07	0.192817	0.124582	0.646115
Ld1S_110045000	ATP-binding cassette protein subfamily A, member 2, putative	11	1058.08	1085.2	1.02564	0.0109929	218	326	0.668712	-0.174761	7.31322e-06	4.55211e-05	0.308106	0.200884	0.651998
Ld1S_110045100	ATP-binding cassette protein subfamily A, member 9, putative;ATP-binding cassette protein subfamily A, member 6, putative;ATP-binding cassette protein subfamily A, member 3, putative (fragment);ATP-binding cassette protein subfamily A, member 7, putative;	11	5386.67	5182.8	0.962153	-0.0167558	486	913	0.532311	-0.273835	1.37996e-10	2.43055e-09	0.169493	0.0937717	0.55325
Ld1S_110045300_pseudogene	ATP-binding cassette protein subfamily A, member 9, putative;ATP-binding cassette protein subfamily A, member 6, putative;ATP-binding cassette protein subfamily A, member 3, putative (fragment);ATP-binding cassette protein subfamily A, member 7, putative;	11	3845.39	3786.76	0.984752	-0.00667306	455	883	0.515289	-0.287949	2.314e-14	8.72865e-13	0.229625	0.120156	0.523267
Ld1S_110045400	hypothetical protein	11	507.034	560.597	1.10564	0.0436136	378	542	0.697417	-0.156507	8.0219e-09	9.91625e-08	1.06896	0.674281	0.630781
Ld1S_110045500	hypothetical protein	11	1108.51	1092.84	0.985864	-0.00618293	758	1066	0.711069	-0.148088	4.74875e-06	3.08248e-05	0.961654	0.693607	0.721265
Ld1S_110045900	hypothetical protein	11	661.987	591.136	0.892972	-0.0491623	762	1027	0.741967	-0.129615	2.11037e-06	1.47793e-05	1.55139	1.28904	0.830896
Ld1S_110046000	ribosomal protein L4/L1 family, putative	11	1158.02	1257.53	1.08593	0.0358016	1034	853	1.21219	0.0835715	0.00304655	0.00922677	0.736603	0.822249	1.11627
Ld1S_110046300	Variant SH3 domain containing protein, putative	11	1025.07	1085.2	1.05866	0.0247569	805	987	0.815603	-0.0885213	0.00328394	0.00982387	0.96286	0.741797	0.77041
Ld1S_120046400	translation initiation factor EIF-2b alpha subunit, putative	12	811.438	1193.18	1.47045	0.16745	1103	907	1.2161	0.0849682	0.00131953	0.00446651	1.11777	0.924422	0.827025
Ld1S_120046700	Mitochondrial SSU ribosomal protein 29, putative	12	1232.29	1773.41	1.43912	0.158097	1763	1416	1.24506	0.0951891	0.000109851	0.000506015	1.14908	0.994132	0.865151
Ld1S_120046900	kinetoplastid-specific phospho-protein phosphatase	12	1333.14	1777.77	1.33352	0.124999	1440	1122	1.28342	0.10837	0.000108163	0.00049955	0.84162	0.810004	0.962434
Ld1S_120047100	hypothetical protein	12	1949.29	2619.76	1.34396	0.128385	1338	867	1.54325	0.188437	1.51745e-14	6.06223e-13	0.444778	0.510735	1.14829
Ld1S_120047200	hypothetical protein	12	344.747	444.988	1.29077	0.110848	197	105	1.87619	0.273277	8.13743e-09	1.0042e-07	0.304572	0.442709	1.45355
Ld1S_120047400	hypothetical protein	12	1522.02	1845.39	1.21246	0.0836679	1338	950	1.40842	0.148733	5.91185e-08	6.08422e-07	0.624171	0.72505	1.16162
Ld1S_120047500	ornithine decarboxylase, putative	12	805.937	1115.74	1.3844	0.141262	756	411	1.83942	0.26468	2.00546e-15	9.32592e-14	0.509965	0.677577	1.32867
Ld1S_120047600	FYVE-type domain-containing protein	12	2098.74	2760.45	1.31529	0.119022	1309	833	1.57143	0.196295	1.62407e-16	9.03413e-15	0.396905	0.474198	1.19474
Ld1S_120047700	hypothetical protein	12	3269.59	4437.88	1.35732	0.132682	2130	1451	1.46795	0.166712	2.10133e-15	9.7203e-14	0.443786	0.479959	1.08151
Ld1S_120047800	Cell division protein kinase, putative	12	1543.11	2277.29	1.47578	0.169022	1758	1397	1.25841	0.0998225	0.000267989	0.00112782	0.905316	0.77197	0.852708
Ld1S_120047900_pseudogene	hypothetical protein	12	1359.73	1793.04	1.31867	0.120136	1241	888	1.39752	0.145359	1.94472e-08	2.22844e-07	0.65307	0.692121	1.0598
Ld1S_120048000	leucine-rich repeat protein, putative	12	3143.98	4276.46	1.36021	0.133605	1545	1045	1.47847	0.169812	3.89844e-12	9.54413e-11	0.332381	0.36128	1.08694
Ld1S_120048100	dolichyl-P-Man:GDP-Man5GlcNAc2-PP-dolichyl alpha-1,2-mannosyltransferase, putative	12	2359.13	3207.62	1.35966	0.133431	978	725	1.34897	0.130001	2.74883e-08	3.05043e-07	0.307317	0.304899	0.992133
Ld1S_120048200	hypothetical protein	12	1332.23	1707.97	1.28204	0.107902	581	438	1.32648	0.122702	9.87092e-05	0.000462696	0.328773	0.34017	1.03467
Ld1S_120048300	hypothetical protein	12	2503.08	3372.31	1.34726	0.129452	923	561	1.64528	0.216239	1.60407e-14	6.35055e-13	0.224124	0.2737	1.2212
Ld1S_120048400	ubiquitin hydrolase, putative	12	4760.44	6370.52	1.33822	0.126528	1721	1134	1.51764	0.181168	5.23795e-17	3.15317e-15	0.238213	0.270151	1.13407
Ld1S_120048500	hypothetical protein	12	3090.8	4378.98	1.41678	0.151302	1241	985	1.2599	0.100336	3.09234e-05	0.000165925	0.318688	0.283399	0.889269
Ld1S_120048700	glyoxalase II, putative	12	823.358	1183.36	1.43724	0.157529	1247	1009	1.23588	0.0919753	0.00200727	0.00642692	1.22547	1.05378	0.859897
Ld1S_120048800	hypothetical protein	12	3399.79	4568.76	1.34384	0.128346	1440	837	1.72043	0.235637	1.4681e-15	7.08963e-14	0.246192	0.315184	1.28024
Ld1S_120049000	cysteinyl-tRNA synthetase, putative	12	2332.54	3185.81	1.36581	0.13539	5147	3472	1.48243	0.170974	5.33109e-12	1.27323e-10	1.48851	1.6156	1.08539
Ld1S_120049100	Helicase associated domain (HA2), putative	12	7554.17	9847.53	1.30359	0.115141	2156	1366	1.57833	0.198198	9.72115e-12	2.20773e-10	0.180827	0.218938	1.21076
Ld1S_120049200	hypothetical protein	12	1807.17	2414.71	1.33619	0.125867	584	411	1.42092	0.152571	5.69251e-06	3.63336e-05	0.227428	0.241851	1.06342
Ld1S_120049300	ornithine decarboxylase	12	2098.74	2734.27	1.30282	0.114884	1895	2196	0.862933	-0.0640231	0.00271589	0.00834322	1.04634	0.693054	0.662358
Ld1S_120049400	hypothetical protein	12	4584.4	6189.47	1.35012	0.130372	1474	1148	1.28397	0.108556	2.78646e-06	1.89993e-05	0.250415	0.238146	0.951008
Ld1S_120049500	hypothetical protein	12	5394.92	7089.26	1.31406	0.118616	2291	1070	2.14112	0.330641	1.3837e-55	1.21613e-51	0.198335	0.323165	1.62939
Ld1S_120049600	hypothetical protein	12	1893.36	2397.26	1.26614	0.102483	869	518	1.67761	0.22469	2.63165e-15	1.19842e-13	0.273588	0.362497	1.32497
Ld1S_120049700	Myotubularin-related protein, putative	12	8916.65	11853.3	1.32934	0.123636	2445	1763	1.38684	0.142027	7.85853e-05	0.000377631	0.19772	0.206273	1.04326
Ld1S_120049800	hypothetical protein	12	2598.44	3333.04	1.28271	0.108129	788	553	1.42495	0.153801	3.63598e-05	0.000191357	0.21282	0.23642	1.11089
Ld1S_120049900	hypothetical protein	12	5803.85	7365.2	1.26902	0.103469	1522	1186	1.28331	0.10833	0.000775145	0.00282101	0.204347	0.206647	1.01126
Ld1S_120050000	CCR4-NOT transcription complex subunit 2, putative	12	1658.63	2139.87	1.29014	0.110636	1549	971	1.59526	0.202832	3.30585e-17	2.0903e-15	0.585421	0.723877	1.23651
Ld1S_120050100	Glutathione S-transferase, N-terminal domain containing protein, putative	12	1124.09	1321.88	1.17595	0.0703878	794	503	1.57853	0.198253	2.90184e-12	7.24553e-11	0.447471	0.600662	1.34235
Ld1S_120050300_pseudogene	pumillio protein 4, putative	12	4220.4	5525.26	1.30918	0.117	1911	1143	1.67192	0.223214	5.18296e-20	4.5553e-18	0.270828	0.345866	1.27707
Ld1S_120050500_pseudogene	3'-nucleotidase/nuclease, putative	12	746.34	1041.58	1.39558	0.144755	3785	2823	1.34077	0.127355	0.000236367	0.00100757	3.78246	3.63391	0.960728
Ld1S_120050900	hypothetical protein	12	1959.37	2619.76	1.33704	0.126144	659	452	1.45796	0.163747	6.26498e-08	6.40811e-07	0.230686	0.25155	1.09044
Ld1S_120051000	hypothetical protein	12	1864.93	2460.52	1.31936	0.120364	904	536	1.68657	0.227004	2.06896e-13	6.35808e-12	0.28741	0.367402	1.27832
Ld1S_120051100	hypothetical protein	12	2961.52	3930.72	1.32727	0.122958	2888	1983	1.45638	0.163274	3.94876e-14	1.42236e-12	0.669589	0.734725	1.09728
Ld1S_120051200	hypothetical protein	12	2275.69	2890.24	1.27005	0.10382	115	223	0.515695	-0.287607	1.94075e-07	1.75848e-06	0.0979921	0.0397891	0.406044
Ld1S_120051300	hypothetical protein	12	2108.82	2662.29	1.26245	0.101216	55	96	0.572917	-0.241909	0.000101	0.000470674	0.045523	0.0206589	0.453812
Ld1S_120051800	WW domain containing protein, putative	12	2687.37	3388.67	1.26096	0.100701	1208	830	1.45542	0.162989	1.3393e-05	7.8006e-05	0.308852	0.356482	1.15422
Ld1S_120052200	Mannosyltransferase-like protein. Cell wall/membrane/envelope biogenesis	12	1586.2	2168.22	1.36693	0.135746	491	358	1.37151	0.137198	4.23224e-05	0.000218421	0.225696	0.226453	1.00335
Ld1S_120052300	General transcription factor IIIC, polypeptide 3. Transcription	12	3825.22	4855.6	1.26936	0.103587	1548	1171	1.32195	0.121214	2.44015e-08	2.74955e-07	0.306126	0.318807	1.04142
Ld1S_120052400	Fusaric acid resistance protein-like, putative	12	5173.03	6681.36	1.29157	0.11112	1165	643	1.81182	0.258115	8.79885e-15	3.77235e-13	0.124298	0.174366	1.4028
Ld1S_120052600	hypothetical protein	12	1499.1	2164.95	1.44417	0.159618	1618	1243	1.30169	0.114507	2.87452e-06	1.95392e-05	0.829165	0.747361	0.901341
Ld1S_120052700	TPR repeat, putative	12	3037.62	3922	1.29114	0.110974	834	458	1.82096	0.260301	8.00639e-14	2.68049e-12	0.150776	0.212647	1.41035
Ld1S_120052800	hypothetical protein	12	4000.34	5130.45	1.2825	0.108058	1199	890	1.34719	0.129429	1.62889e-06	1.17347e-05	0.222481	0.233703	1.05044
Ld1S_120053100	hypothetical protein	12	2079.48	2498.69	1.20159	0.0797577	1648	1286	1.28149	0.107716	1.98517e-07	1.79134e-06	0.618423	0.659545	1.06649
Ld1S_120053300	cytochrome oxidase subunit IV, putative	12	1230.45	1577.09	1.28171	0.107791	5012	3892	1.28777	0.109838	0.000563819	0.00213503	3.16307	3.17801	1.00472
Ld1S_120053400	Bardet-Biedl syndrome 5 protein	12	1466.09	1739.6	1.18655	0.0742879	1342	1005	1.33532	0.125586	2.65498e-07	2.34283e-06	0.685497	0.771443	1.12538
Ld1S_120053600	Leucine Rich repeat, putative	12	2450.82	3090.92	1.26118	0.100777	1486	1044	1.42337	0.153318	2.27741e-10	3.87161e-09	0.42598	0.480763	1.1286
Ld1S_120053800	Protein of unknown function (DUF962), putative	12	439.185	522.424	1.18953	0.0753756	182	267	0.681648	-0.16644	2.82471e-06	1.92304e-05	0.607944	0.348376	0.573039
Ld1S_120053900_pseudogene	hypothetical protein	12	1460.59	1737.42	1.18953	0.0753756	163	86	1.89535	0.277689	0.00285082	0.00871206	0.0588804	0.0938175	1.59336
Ld1S_120054000	hypothetical protein	12	4931.89	5703.04	1.15636	0.0630927	1032	1448	0.712707	-0.147089	0.000476169	0.00185343	0.293599	0.180956	0.616337
Ld1S_120054200_pseudogene	protein, conserved. Source GeneDB. Function unknown	12	4605.48	5938.62	1.28947	0.11041	139	84	1.65476	0.218736	0.000293403	0.00121925	0.0182391	0.0234061	1.28329
Ld1S_120055200	hypothetical protein	12	8983.58	10548.8	1.17423	0.0697545	3688	6246	0.590458	-0.228811	4.62952e-16	2.40312e-14	0.695268	0.349612	0.502845
Ld1S_120055900_pseudogene	protein, conserved. Source GeneDB. Function unknown	12	4619.24	5663.78	1.22613	0.0885358	37	17	2.17647	0.337753	0.00290974	0.00885517	0.00368026	0.00653274	1.77508
Ld1S_120056000	Coiled-coil domain containing 104. Function unknown	12	3165.07	3980.89	1.25776	0.0995977	801	1348	0.594214	-0.226057	2.78571e-14	1.03744e-12	0.425899	0.201211	0.472438
Ld1S_120056100	hypothetical protein	12	1695.31	1989.36	1.17345	0.0694636	69	18	3.83333	0.583577	0.000277278	0.00115808	0.0106175	0.0346846	3.26673
Ld1S_120056200	hypothetical protein	12	1482.59	2110.42	1.42346	0.153347	609	818	0.744499	-0.128136	8.02696e-07	6.25434e-06	0.551736	0.288568	0.523019
Ld1S_120056400_pseudogene	protein, conserved. Source GeneDB. Function unknown	12	5107.93	6192.75	1.21238	0.0836379	150	68	2.20588	0.343582	3.46915e-06	2.31689e-05	0.0133126	0.0242219	1.81947
Ld1S_120056600	hypothetical protein	12	4642.16	5968.07	1.28562	0.109114	2124	1685	1.26053	0.100555	6.66453e-07	5.27224e-06	0.362978	0.355894	0.980485
Ld1S_120057100	n-ethylmaleimide reductase-like protein	12	2418.73	2940.41	1.21568	0.0848207	566	801	0.706617	-0.150816	3.61251e-06	2.40533e-05	0.331166	0.19249	0.58125
Ld1S_120057300	Putative integral membrane protein conserved region (DUF2404), putative	12	2485.66	3461.74	1.39269	0.143853	922	683	1.34993	0.13031	4.95034e-07	4.05864e-06	0.274776	0.26634	0.969298
Ld1S_120057500	hypothetical protein	12	2467.32	3241.43	1.31374	0.118511	1145	669	1.71151	0.233379	1.68617e-14	6.61594e-13	0.271144	0.353239	1.30277
Ld1S_120057600	ABC transporter, putative	12	4648.58	6006.24	1.29206	0.111283	1275	924	1.37987	0.139838	9.43605e-07	7.21788e-06	0.19877	0.212279	1.06796
Ld1S_120057800	transfer protein. Lipid transport and metabolism	12	2887.25	3673.33	1.27226	0.104575	879	556	1.58094	0.198914	1.30208e-14	5.29814e-13	0.192571	0.239292	1.24262
Ld1S_120057900	WD repeat and HMG-box DNA-binding protein, putative	12	3859.15	5045.38	1.30738	0.116402	1101	699	1.57511	0.19731	6.00862e-12	1.42729e-10	0.181128	0.21822	1.20478
Ld1S_120058100	function. Posttranslational modification, protein turnover, chaperones	12	2568.18	3337.41	1.29952	0.113784	1159	880	1.31705	0.119601	1.98262e-06	1.403e-05	0.342655	0.347276	1.01348
Ld1S_120058200	puromycin-sensitive aminopeptidase-like protein	12	3905.91	4935.22	1.26353	0.101585	1507	1110	1.35766	0.13279	2.22398e-10	3.7881e-09	0.284185	0.305356	1.0745
Ld1S_120058400	arginine N-methyltransferase-like protein	12	1068.16	1346.96	1.261	0.100717	2820	1760	1.60227	0.204736	7.46221e-19	5.80401e-17	1.64769	2.0936	1.27063
Ld1S_120058500_pseudogene	hypothetical protein	12	1754.91	2424.53	1.38157	0.140373	779	578	1.34775	0.12961	5.47025e-07	4.43525e-06	0.329362	0.3213	0.975521
Ld1S_120058600	hypothetical protein	12	695.911	787.454	1.13154	0.0536711	389	303	1.28383	0.108507	0.00119081	0.00408829	0.4354	0.493997	1.13458
Ld1S_120058700	SET domain containing protein, putative	12	1809	2266.38	1.25284	0.0978941	1395	1058	1.31853	0.120089	3.40154e-07	2.92081e-06	0.584853	0.615518	1.05243
Ld1S_120058900	FAM91 N-terminus/FAM91 C-terminus, putative	12	2459.07	3145.45	1.27912	0.106912	784	596	1.31544	0.11907	3.72064e-06	2.46612e-05	0.242368	0.249249	1.02839
Ld1S_120059000	Vacuolar sorting protein 39 domain 1/Vacuolar sorting protein 39 domain 2, putative	12	2832.24	3603.53	1.27232	0.104598	1092	726	1.50413	0.177286	3.80634e-12	9.34468e-11	0.256334	0.303036	1.18219
Ld1S_120059100	Alpha/beta hydrolase domain-containing protein	12	1751.24	2339.46	1.33589	0.12577	955	627	1.52313	0.182736	7.13662e-09	8.94775e-08	0.358032	0.408214	1.14016
Ld1S_120059200	hypothetical protein	12	1279.05	1632.71	1.27651	0.106023	470	294	1.59864	0.203751	1.95513e-09	2.76264e-08	0.229859	0.287865	1.25235
Ld1S_130059300	WD40. Function unknown	13	1848.43	1826.85	0.988325	-0.00510007	621	439	1.41458	0.150627	2.52938e-07	2.25007e-06	0.237499	0.33993	1.43129
Ld1S_130059400	cis-prenyltransferase-like protein	13	1076.42	1148.46	1.06693	0.0281359	792	1029	0.769679	-0.11369	9.80019e-07	7.44459e-06	0.95595	0.689619	0.721396
Ld1S_130059500	hypothetical protein	13	681.241	751.462	1.10308	0.0426061	651	808	0.805693	-0.0938304	0.00215914	0.00685078	1.18607	0.866311	0.730405
Ld1S_130059600	hypothetical protein	13	772.012	805.995	1.04402	0.018708	886	1207	0.734051	-0.134274	3.41706e-08	3.7169e-07	1.56345	1.09926	0.703102
Ld1S_130059700	ribonuclease HII, putative	13	687.659	765.641	1.1134	0.0466515	691	942	0.733546	-0.134573	5.4735e-06	3.50887e-05	1.36986	0.902512	0.658833
Ld1S_130059800	hypothetical protein	13	1567.86	1447.3	0.923104	-0.0347495	502	677	0.741507	-0.129885	9.93346e-05	0.000464636	0.431798	0.346853	0.803276
Ld1S_130059900	hypothetical protein	13	809.604	840.896	1.03865	0.0164693	754	981	0.768603	-0.114298	7.30397e-07	5.72655e-06	1.2117	0.896663	0.740002
Ld1S_130060100	carboxypeptidase, putative;metallo-peptidase, Clan MA(E) Family M32	13	1400.99	1416.76	1.01126	0.00486144	2574	3253	0.79127	-0.101676	0.00077426	0.00281896	2.32193	1.81682	0.782462
Ld1S_130060200	hypothetical protein	13	1016.82	1066.66	1.04902	0.020783	262	375	0.698667	-0.15573	0.00021491	0.000927722	0.368797	0.245626	0.66602
Ld1S_130060500	Kinesin-13 2, putative	13	1996.96	1962.09	0.982537	-0.00765106	700	871	0.803674	-0.0949201	0.00108524	0.00377751	0.436162	0.356762	0.817958
Ld1S_130060800	protein kinase A regulatory subunit	13	1261.63	1308.79	1.03738	0.0159385	1803	3018	0.597416	-0.223724	1.0465e-14	4.40081e-13	2.39215	1.37761	0.575888
Ld1S_130060900	MOZ/SAS family acetyltransferase, putative	13	1763.16	1654.53	0.938387	-0.0276181	989	1309	0.755539	-0.121743	1.44995e-06	1.05581e-05	0.742417	0.597755	0.805146
Ld1S_130061100	hypothetical protein	13	714.249	761.278	1.06584	0.0276936	243	564	0.430851	-0.365673	5.50501e-20	4.79045e-18	0.789641	0.3192	0.404235
Ld1S_130061200	Lipase (class 3), putative	13	2036.39	1986.08	0.975297	-0.010863	475	724	0.656077	-0.183045	4.61212e-07	3.835e-06	0.355531	0.239164	0.672695
Ld1S_130061300	Triglyceride lipase, putative	13	1724.65	1895.56	1.0991	0.0410366	416	510	0.815686	-0.0884768	0.00284463	0.00869617	0.295712	0.21946	0.742141
Ld1S_130061600	Domain of unknown function (DUF4200), putative	13	843.529	761.278	0.902492	-0.0445568	949	1319	0.719484	-0.142979	6.21133e-10	9.54395e-09	1.56367	1.24659	0.79722
Ld1S_130062800	alpha tubulin	13	1172.69	1023.04	0.872385	-0.0592921	45	83	0.542169	-0.265866	0.000862222	0.00309309	0.0707775	0.0439867	0.621479
Ld1S_130063200	long-chain-fatty-acid-CoA ligase, putative	13	1627.46	1737.42	1.06756	0.0283931	1855	2216	0.837094	-0.0772258	0.000674534	0.00249109	1.36163	1.06768	0.784117
Ld1S_130063300	Flagellar radial spoke protein 4/6	13	1607.29	1585.81	0.986639	-0.00584186	1570	1889	0.831128	-0.0803323	0.000359685	0.00145146	1.17527	0.990028	0.842383
Ld1S_130063500	ALBA-domain protein 1	13	415.346	466.801	1.12388	0.0507212	15046	21850	0.688604	-0.16203	1.87321e-11	4.06509e-10	52.6067	32.2322	0.612701
Ld1S_130063600	C2 domain containing protein, putative	13	1288.22	1272.8	0.98803	-0.00522982	4631	6188	0.748384	-0.125876	2.08087e-06	1.46076e-05	4.80354	3.63845	0.757451
Ld1S_130063900	Histidine phosphatase superfamily (branch 1), putative	13	1445	1398.22	0.967626	-0.0142925	1125	1393	0.807609	-0.0927986	0.000277365	0.00115808	0.964013	0.804594	0.83463
Ld1S_130064500	Uncharacterized ACR, COG1678, putative	13	1875.02	1741.78	0.928939	-0.0320127	1148	915	1.25464	0.0985208	4.24881e-06	2.78262e-05	0.487995	0.659097	1.35062
Ld1S_130064800	hypothetical protein	13	5146.44	4893.77	0.950904	-0.0218633	2196	1818	1.20792	0.0820385	0.000385657	0.00154271	0.353254	0.448733	1.27029
Ld1S_130064900	hypothetical protein	13	972.809	911.788	0.937274	-0.0281335	825	1137	0.725594	-0.139307	9.15654e-07	7.03469e-06	1.16878	0.904815	0.774153
Ld1S_130065100	actyltransferase-like protein	13	885.705	905.245	1.02206	0.00947661	695	1006	0.690855	-0.160613	7.9998e-10	1.20808e-08	1.13582	0.767748	0.675943
Ld1S_130065400	importin. Intracellular trafficking, secretion, and vesicular transport;Nuclear structure	13	3850.89	3650.43	0.947943	-0.0232179	1807	1501	1.20386	0.0805775	0.00228624	0.00720465	0.38978	0.495011	1.26998
Ld1S_130065800	Metallopeptidase family M24, putative	13	1653.13	1555.28	0.940805	-0.0265006	677	483	1.40166	0.146642	0.000147904	0.000657194	0.292172	0.435293	1.48985
Ld1S_130066100	Putative GTPase activating protein for Arf, putative	13	1367.07	1325.15	0.969336	-0.0135257	431	159	2.71069	0.43308	1.45589e-17	9.84291e-16	0.116307	0.325247	2.79644
Ld1S_130066200	oxidoreductase-like protein	13	883.872	898.701	1.01678	0.00722583	359	264	1.35985	0.133491	0.000195069	0.000846648	0.298686	0.399466	1.33741
Ld1S_130066300	ubiquitin-like protein	13	2228.93	2227.12	0.999186	-0.000353574	1622	1194	1.35846	0.133047	5.08446e-06	3.28101e-05	0.535682	0.728295	1.35957
Ld1S_130066400	Calcium-activated chloride channel, putative	13	2570.01	2447.43	0.952304	-0.0212246	820	653	1.25574	0.0989007	5.42767e-05	0.000272126	0.254084	0.335045	1.31864
Ld1S_130066800	protein kinase, putative	13	1579.78	1610.9	1.0197	0.00847087	1479	1957	0.755749	-0.121623	6.54029e-06	4.11767e-05	1.23878	0.918121	0.741151
Ld1S_130066900	hypothetical protein	13	2056.56	2079.88	1.01134	0.00489707	816	617	1.32253	0.121405	9.0946e-06	5.52783e-05	0.300016	0.39233	1.3077
Ld1S_130067800	hypothetical protein	13	1830.09	1753.77	0.958299	-0.0184988	2096	2755	0.760799	-0.11873	0.00237176	0.00743968	1.50539	1.19514	0.793905
Ld1S_130068400	N(2), N(2)-dimethylguanosine tRNA methyltransferase, putative	13	1942.87	1979.54	1.01888	0.00812132	1106	888	1.2455	0.0953422	0.000143139	0.000636987	0.457056	0.558715	1.22242
Ld1S_130068800	AMP deaminase, putative	13	4929.14	4768.35	0.967379	-0.0144035	1905	1546	1.23221	0.0906855	0.00038581	0.00154271	0.313645	0.399509	1.27376
Ld1S_130069000	hypothetical protein	13	1537.61	1416.76	0.921407	-0.0355483	598	469	1.27505	0.105528	0.00307766	0.00930927	0.30502	0.422089	1.38381
Ld1S_130069200	Cryptococcal mannosyltransferase 1, putative	13	3393.37	3358.13	0.989615	-0.00453375	1638	1346	1.21694	0.0852688	3.89256e-05	0.000203037	0.396656	0.487771	1.22971
Ld1S_130069600	Dpy-30 motif containing protein, putative	13	676.657	664.21	0.981605	-0.00806342	539	674	0.799703	-0.0970711	0.000521444	0.00199694	0.996073	0.811491	0.81469
Ld1S_130069700	NADH-cytochrome b5 reductase, putative	13	945.303	870.344	0.920704	-0.0358801	996	1269	0.78487	-0.105202	1.22204e-06	9.04846e-06	1.34243	1.14438	0.852468
Ld1S_130070400	Uncharacterised ACR, YagE family COG1723, putative	13	1665.97	1679.61	1.00819	0.00354144	940	774	1.21447	0.0843869	0.0024698	0.00768663	0.464594	0.559654	1.20461
Ld1S_130070600	hypothetical protein	13	890.29	799.451	0.897967	-0.0467396	980	1315	0.745247	-0.1277	6.63734e-06	4.17279e-05	1.47705	1.22584	0.829927
Ld1S_130070700	calmodulin, putative	13	650.067	556.235	0.855657	-0.0677004	736	974	0.755647	-0.121681	0.000141768	0.000631846	1.49831	1.32318	0.883119
Ld1S_130070900	dynein light chain Tctex-type, putative	13	408.928	381.73	0.933488	-0.0298912	546	860	0.634884	-0.197306	3.84592e-10	6.21357e-09	2.10306	1.43033	0.68012
Ld1S_130071200	nucleobase transporter	13	1256.12	1282.61	1.02109	0.0090624	11868	8725	1.36023	0.133612	0.000234862	0.00100253	6.94597	9.253	1.33214
Ld1S_130071700	hypothetical protein	13	498.782	482.07	0.966494	-0.014801	289	373	0.774799	-0.110811	0.000698237	0.00257093	0.747821	0.599498	0.80166
Ld1S_130071800	hypothetical protein	13	541.876	536.603	0.990269	-0.00424673	282	516	0.546512	-0.262401	1.65717e-15	7.83058e-14	0.952248	0.525528	0.551882
Ld1S_130072200	hypothetical protein	13	2404.06	2219.49	0.923225	-0.0346926	937	779	1.20282	0.0802021	0.00287828	0.00877766	0.324036	0.42217	1.30285
Ld1S_130072400	hypothetical protein	13	1089.25	982.681	0.902161	-0.044716	506	662	0.76435	-0.116707	0.000171813	0.000752399	0.607756	0.514918	0.847244
Ld1S_130072500	hypothetical protein	13	1205.7	1062.3	0.881067	-0.0549911	71	155	0.458065	-0.339073	0.00173953	0.0056646	0.128556	0.0668362	0.519898
Ld1S_130072600	vacuolar protein sorting 51 homolog (S. cerevisiae). Intracellular trafficking, secretion, and vesicular transport	13	1439.5	1243.35	0.863736	-0.0636192	1688	2175	0.776092	-0.110087	3.29422e-06	2.21184e-05	1.51094	1.35762	0.898529
Ld1S_130072900	hypothetical protein	13	2044.64	1966.45	0.96176	-0.0169335	2032	2825	0.719292	-0.143095	6.98549e-06	4.36667e-05	1.38166	1.03333	0.747892
Ld1S_130073400_pseudogene	hypothetical protein	13	3737.2	3655.88	0.97824	-0.00955452	541	965	0.560622	-0.25133	6.22723e-11	1.20553e-09	0.258215	0.147981	0.573092
Ld1S_130074200	Ran-binding protein 1, putative	13	526.289	475.526	0.903546	-0.0440498	1862	2359	0.789318	-0.102748	3.45658e-05	0.000183453	4.48233	3.91566	0.873578
Ld1S_130074600	hypothetical protein	13	455.689	462.438	1.01481	0.00638512	484	667	0.725637	-0.13928	5.58034e-06	3.56695e-05	1.46372	1.04663	0.715047
Ld1S_130074900	hypothetical protein	13	1227.7	1337.14	1.08914	0.0370855	1448	1878	0.771033	-0.112927	0.000540665	0.00205889	1.52969	1.0829	0.707925
Ld1S_130076000	dynein heavy chain (pseudogene), putative;Inner arm dynein 5-1;dynein heavy chain, putative;dynein heavy chain, cytosolic, putative	13	11062.1	11689.7	1.05673	0.0239621	7897	10528	0.750095	-0.124884	0.000917237	0.00326645	0.951714	0.675555	0.70983
Ld1S_130076300	pyrroline-5-carboxylate reductase	13	754.592	795.088	1.05367	0.0227033	5838	7231	0.807357	-0.0929343	7.42703e-05	0.000359252	9.58267	7.34258	0.766236
Ld1S_130076400	Protein Associated with Differentiation, putative;major facilitator superfamily, putative	13	1394.57	1483.29	1.06362	0.0267853	562	1323	0.424792	-0.371824	6.41984e-22	8.06057e-20	0.948677	0.378887	0.399384
Ld1S_140076600	exosome complex exonuclease, putative	14	940.718	933.602	0.992435	-0.00329795	759	943	0.804878	-0.0942699	0.000637396	0.0023788	1.00243	0.812981	0.811013
Ld1S_140076700	phosphatidylinositol 3-kinase 2, putative	14	2552.59	2793.17	1.09425	0.039116	1431	2021	0.708065	-0.149927	6.43304e-08	6.54398e-07	0.791744	0.512321	0.647079
Ld1S_140078300	carboxypeptidase, putative;metallo-peptidase, Clan MA(E) Family M32	14	1347.81	1326.24	0.983993	-0.00700811	3077	5451	0.564484	-0.248349	2.56334e-14	9.62788e-13	4.04433	2.3201	0.573666
Ld1S_140078600	Domain of unknown function (DUF4201), putative	14	1325.81	1334.96	1.00691	0.00298877	1025	1408	0.727983	-0.137879	1.07005e-05	6.42393e-05	1.06199	0.767812	0.72299
Ld1S_140078700	PX domain containing protein, putative	14	1396.41	1449.48	1.03801	0.0162007	452	355	1.27324	0.10491	0.000972597	0.00342886	0.254224	0.311836	1.22662
Ld1S_140079000	HIT domain containing protein, putative	14	464.858	405.724	0.872792	-0.0590894	624	790	0.789873	-0.102443	0.000138187	0.000619023	1.69944	1.53799	0.904996
Ld1S_140079100	hypothetical protein	14	541.876	555.144	1.02449	0.0105059	1158	1510	0.766887	-0.115268	3.55351e-05	0.000188143	2.78662	2.08595	0.748558
Ld1S_140079400	Nucleus and spindle associated protein 3, putative	14	2671.79	2567.4	0.960932	-0.0173074	1738	1424	1.22051	0.0865398	0.000571613	0.00216175	0.532977	0.676948	1.27013
Ld1S_140079500	NAD dependent epimerase dehydratase family protein. Carbohydrate transport and metabolism;Cell wall/membrane/envelope biogenesis	14	763.76	785.272	1.02817	0.0120631	1283	1806	0.71041	-0.148491	1.15396e-05	6.8621e-05	2.36462	1.63383	0.690949
Ld1S_140079700	proteasome alpha 3 subunit, putative	14	820.607	848.53	1.03403	0.0145322	1458	2085	0.699281	-0.155349	7.44505e-11	1.40117e-09	2.5408	1.71826	0.676269
Ld1S_140079800	Polyamine transporter 1, putative	14	2168.42	2195.49	1.01248	0.00538828	1728	2277	0.758893	-0.119819	3.49192e-07	2.98256e-06	1.05007	0.787068	0.749536
Ld1S_140080400	Plasma-membrane choline transporter, putative	14	1754.91	1682.88	0.958958	-0.0182004	811	1084	0.748155	-0.126008	7.00619e-05	0.000341338	0.617697	0.481911	0.780175
Ld1S_140080800	hypothetical protein	14	597.805	606.405	1.01439	0.00620284	440	588	0.748299	-0.125925	1.25397e-05	7.38683e-05	0.983598	0.725588	0.737688
Ld1S_140081700	Amastin surface glycoprotein, putative	14	826.108	780.91	0.945287	-0.0244361	94	135	0.696296	-0.157206	0.00276719	0.00847416	0.163417	0.120372	0.736597
Ld1S_140081800	amastin-like surface protein-like protein. Function unknown	14	849.947	773.275	0.909792	-0.0410579	638	979	0.651685	-0.185962	0.000111557	0.000512801	1.15184	0.825062	0.716301
Ld1S_140082000	stearic acid desaturase, putative;fatty-acid desaturase, putative	14	1261.63	1175.73	0.931914	-0.030624	120	173	0.693642	-0.158865	0.00027991	0.00116815	0.137125	0.102064	0.744319
Ld1S_140082300	ion transport protein-like protein	14	1275.38	1258.62	0.986857	-0.00574567	1333	1593	0.836786	-0.0773856	0.000110446	0.000508226	1.24904	1.0591	0.84793
Ld1S_140082600	hypothetical protein	14	734.42	771.094	1.04994	0.0211625	519	661	0.785174	-0.105034	0.000323576	0.00132955	0.90003	0.67307	0.747831
Ld1S_140082700	WD domain, G-beta repeat, putative	14	3189.82	2916.41	0.914287	-0.0389174	1879	1328	1.41491	0.150729	3.73141e-11	7.75305e-10	0.416324	0.644284	1.54755
Ld1S_140083700	fatty acid elongase, putative	14	741.755	784.182	1.0572	0.024156	1962	2542	0.771833	-0.112477	1.48939e-06	1.08258e-05	3.42701	2.50197	0.730075
Ld1S_140083800	fatty acid elongase, putative	14	805.02	882.341	1.09605	0.0398297	3908	3188	1.22585	0.0884362	0.000829108	0.00299385	3.96015	4.42913	1.11842
Ld1S_140083900	fatty acid elongase, putative	14	842.612	766.731	0.909946	-0.0409845	34	92	0.369565	-0.432309	7.62448e-10	1.15338e-08	0.109184	0.0443441	0.40614
Ld1S_140084400	fatty acid elongase, putative;fatty acid elongase, puatative	14	1095.67	1060.12	0.967551	-0.014326	73	138	0.528986	-0.276556	3.03796e-07	2.6384e-06	0.12595	0.0688603	0.546726
Ld1S_140084500	fatty acid elongase, putative	14	1001.23	948.871	0.947703	-0.0233277	85	165	0.515152	-0.288065	8.68052e-10	1.2975e-08	0.164797	0.0895802	0.543579
Ld1S_140084600	fatty acid elongase, putative;fatty acid elongase, puatative	14	1058.08	978.318	0.924618	-0.0340377	159	278	0.571942	-0.242648	2.35612e-08	2.67199e-07	0.26274	0.162524	0.618572
Ld1S_140084800	hypothetical protein	14	4925.48	4838.15	0.982271	-0.00776882	1334	996	1.33936	0.126896	1.88904e-07	1.72151e-06	0.202214	0.275725	1.36353
Ld1S_140085000	hypothetical protein	14	1117.68	961.959	0.860678	-0.0651595	766	1074	0.713222	-0.146776	4.13036e-08	4.41627e-07	0.960923	0.796292	0.828674
Ld1S_140085300	hypothetical protein	14	1174.52	1292.43	1.10039	0.0415449	1225	925	1.32432	0.121994	1.26272e-05	7.42844e-05	0.787554	0.947829	1.20351
Ld1S_140085900	calpain-like cysteine peptidase, putative	14	342.913	295.568	0.861933	-0.0645267	693	1077	0.643454	-0.191482	3.95274e-05	0.000205688	3.14074	2.34464	0.746525
Ld1S_140086800	immunodominant antigen, putative	14	2326.12	2126.78	0.914302	-0.0389102	1861	1543	1.20609	0.0813804	0.0010583	0.00369398	0.663336	0.875032	1.31914
Ld1S_140086900	hypothetical protein	14	2201.43	2115.87	0.961137	-0.0172148	1420	1071	1.32586	0.122499	3.27089e-05	0.000174866	0.486503	0.671118	1.37947
Ld1S_140087200	Phosphoribulokinase uridine kinase family protein. Nucleotide transport and metabolism;Coenzyme transport and metabolism	14	933.383	829.989	0.889227	-0.0509875	757	524	1.44466	0.159765	1.26707e-08	1.50084e-07	0.561399	0.91206	1.62462
Ld1S_140087600_pseudogene	hypothetical protein	14	2817.57	2712.46	0.962695	-0.0165111	965	812	1.18842	0.0749713	0.00132176	0.00446976	0.288192	0.355765	1.23448
Ld1S_140087800	hypothetical protein	14	1293.72	1315.33	1.01671	0.00719594	1559	1851	0.842247	-0.0745603	0.00108653	0.00377751	1.43076	1.18525	0.828407
Ld1S_140088000	hypothetical protein	14	605.14	576.957	0.953427	-0.0207126	774	1015	0.762562	-0.117725	0.000220226	0.000947878	1.6773	1.34152	0.799811
Ld1S_140088100	COQ9, putative	14	793.101	739.465	0.932372	-0.0304108	585	905	0.646409	-0.189493	3.80598e-10	6.17172e-09	1.14109	0.791113	0.693295
Ld1S_140088500	PQ loop repeat, putative	14	696.828	678.388	0.973537	-0.0116476	601	733	0.819918	-0.0862295	0.00205975	0.00656864	1.05191	0.885924	0.842205
Ld1S_140088800	hypothetical protein	14	1015.9	967.412	0.952269	-0.0212405	451	581	0.776248	-0.11	0.0016681	0.0054522	0.571905	0.466192	0.815156
Ld1S_140088900	kinesin K39, putative (fragment)	14	8680.1	8296.62	0.955821	-0.0196233	2012	2466	0.815896	-0.0883651	0.00275827	0.00845567	0.284098	0.242508	0.853607
Ld1S_140089000	kinesin K39, putative (fragment)	14	7460.65	7428.46	0.995686	-0.00187779	826	1131	0.730327	-0.136483	8.19886e-09	1.00924e-07	0.151595	0.111194	0.733492
Ld1S_140089100	kinesin K39, putative (fragment)	14	17568.3	17310.9	0.985347	-0.00641087	1312	1786	0.734602	-0.133948	4.51011e-05	0.000230461	0.10166	0.0757904	0.745527
Ld1S_140089200	hypothetical protein	14	2363.71	2372.18	1.00358	0.001552	931	708	1.31497	0.118916	1.48543e-05	8.57221e-05	0.299529	0.392467	1.31028
Ld1S_140089500	hypothetical protein	14	1005.82	973.956	0.968324	-0.0139795	768	1128	0.680851	-0.166948	1.02489e-06	7.75193e-06	1.12148	0.788537	0.703124
Ld1S_140089600	enolase	14	1266.21	1234.62	0.975053	-0.0109716	7186	9549	0.75254	-0.123471	2.12822e-07	1.91649e-06	7.5414	5.8204	0.771793
Ld1S_140089900	Bifunctional NAD(P)H-hydrate repair enzyme	14	1497.26	1597.81	1.06715	0.0282271	1244	1541	0.807268	-0.0929823	0.000163194	0.000718239	1.02921	0.778565	0.756468
Ld1S_140090000	phosphatidylserine synthase, putative	14	1378.07	1364.41	0.990088	-0.00432602	1093	842	1.2981	0.113308	5.39939e-06	3.46389e-05	0.611	0.801078	1.31109
Ld1S_140090300	hypothetical protein	14	1570.61	1477.84	0.940931	-0.0264424	809	985	0.82132	-0.0854877	0.00180772	0.00586059	0.627143	0.547421	0.87288
Ld1S_140090700	ubiquitin/ribosomal protein S27a, putative	14	473.11	462.438	0.977444	-0.0099082	5960	8413	0.708427	-0.149705	7.49032e-09	9.31152e-08	17.7823	12.8882	0.724776
Ld1S_140090900	hypothetical protein	14	2188.59	2298.01	1.05	0.0211878	333	460	0.723913	-0.140314	0.000217383	0.000937476	0.210181	0.144908	0.689443
Ld1S_140091200	serine hydroxymethyltranferase (SHMT-S);serine hydroxymethyltransferase (SHMT-L)	14	1249.71	1305.52	1.04466	0.0189739	1822	2275	0.800879	-0.096433	1.43585e-05	8.30242e-05	1.82043	1.39562	0.766643
Ld1S_140091300	DnaJ domain containing protein, putative	14	1618.29	1472.39	0.909839	-0.0410353	1416	1735	0.816138	-0.0882362	7.57901e-06	4.69098e-05	1.07212	0.961705	0.897014
Ld1S_140091400_pseudogene	delta-6 fatty acid desaturase, putative	14	1149.77	1119.01	0.973252	-0.0117745	1279	1035	1.23575	0.0919302	0.00191187	0.00615058	0.900183	1.14297	1.26971
Ld1S_140091700	tyrosyl-tRNA synthetase, putative	14	1768.66	1585.81	0.896619	-0.0473922	1525	1063	1.43462	0.156737	4.03512e-09	5.31705e-08	0.60102	0.961651	1.60003
Ld1S_140091900	emp24/gp25L/p24 family/GOLD, putative	14	639.065	696.929	1.09055	0.0376437	1052	1450	0.725517	-0.139352	4.27467e-05	0.000220352	2.26894	1.50948	0.665279
Ld1S_140092900	glutathione-S-transferase/glutaredoxin,putative	14	853.615	896.519	1.05026	0.0212978	1668	1378	1.21045	0.0829468	0.000861439	0.00309154	1.61431	1.86053	1.15252
Ld1S_150094300	ATP-dependent RNA helicase, putative	15	2038.22	2205.31	1.08198	0.0342173	429	298	1.4396	0.158241	2.12926e-05	0.000118669	0.146206	0.194531	1.33053
Ld1S_150094400	zinc finger (CCCH type) protein, putative	15	728.919	797.27	1.09377	0.0389259	67	112	0.598214	-0.223143	3.56966e-05	0.000188618	0.153652	0.0840368	0.546929
Ld1S_150094500	WD40. Function unknown	15	684.909	740.555	1.08125	0.0339248	335	432	0.775463	-0.110439	0.000413541	0.00163648	0.630741	0.452363	0.717193
Ld1S_150096100	replication Factor A 28 kDa subunit, putative	15	725.252	756.915	1.04366	0.0185586	1185	1430	0.828671	-0.0816177	0.00146613	0.0048847	1.97173	1.56556	0.794006
Ld1S_150096400	hypothetical protein	15	2505.83	2521.6	1.00629	0.00272385	985	708	1.39124	0.143403	1.79179e-07	1.63871e-06	0.282541	0.390625	1.38254
Ld1S_150096700	alpha/beta hydrolase fold, putative;Isoprenylcysteine alpha-carbonyl methylesterase, putative	15	2399.47	2449.61	1.0209	0.00898168	2219	3421	0.648641	-0.187996	6.48808e-13	1.79886e-11	1.42573	0.905857	0.635364
Ld1S_150097000	hypothetical protein	15	2094.15	1957.73	0.934854	-0.029256	1410	1717	0.8212	-0.0855512	0.00325038	0.00974932	0.819902	0.720223	0.878425
Ld1S_150097400	cytoplasmic l-asparaginase i-like protein	15	1239.62	1317.51	1.06284	0.0264659	684	874	0.782609	-0.106455	0.000214855	0.000927722	0.705054	0.51916	0.736341
Ld1S_150097600	hypothetical protein	15	1949.29	2217.3	1.1375	0.0559498	1227	1023	1.19941	0.0789689	0.0010234	0.00358212	0.524808	0.553375	1.05443
Ld1S_150097800	5'-3' exonuclease. RNA processing and modification	15	1145.18	1107.02	0.966672	-0.0147207	461	348	1.32471	0.122122	0.000386347	0.00154416	0.303882	0.416435	1.37038
Ld1S_150098800	hypothetical protein	15	2345.38	2381.99	1.01561	0.00672774	812	642	1.2648	0.102021	9.92124e-05	0.000464312	0.27373	0.340891	1.24536
Ld1S_150099000	ecotin, putative	15	674.823	718.742	1.06508	0.0273832	550	876	0.627854	-0.202141	1.87886e-15	8.83066e-14	1.29812	0.765226	0.589488
Ld1S_150099400	hypothetical protein	15	5316.98	5475.09	1.02974	0.0127263	1173	985	1.19086	0.0758618	0.00125268	0.00427232	0.185255	0.214243	1.15647
Ld1S_150099600	hypothetical protein	15	1251.54	1250.98	0.999554	-0.000193586	364	477	0.763103	-0.117417	5.67164e-05	0.000282906	0.38113	0.290971	0.763443
Ld1S_150100000	hypothetical protein	15	3745.45	3840.2	1.0253	0.0108496	1202	1384	0.868497	-0.0612316	0.00331213	0.00989393	0.369515	0.313005	0.847069
Ld1S_150100100_pseudogene	CRAL/TRIO domain containing protein, putative	15	1685.22	1576	0.935186	-0.029102	1239	1531	0.809275	-0.0919039	0.000140961	0.000628886	0.908484	0.786168	0.865363
Ld1S_150100300	hypothetical protein	15	3121.97	3004.76	0.962454	-0.0166199	1014	2370	0.427848	-0.36871	6.93666e-55	3.04832e-51	0.759135	0.337465	0.444539
Ld1S_150101400	hypothetical protein	15	357.583	356.645	0.997376	-0.00114121	314	406	0.773399	-0.111596	0.000848919	0.00305035	1.1354	0.880428	0.775434
Ld1S_150101500	Protein of unknown function (DUF2871), putative	15	704.163	724.196	1.02845	0.0121825	1679	2322	0.723084	-0.140812	8.67012e-08	8.50466e-07	3.29753	2.31843	0.703082
Ld1S_150101900	hypothetical protein	15	1785.16	1871.57	1.0484	0.020527	237	370	0.640541	-0.193453	7.82672e-09	9.70226e-08	0.207264	0.126632	0.61097
Ld1S_150102000_pseudogene	ATP-binding cassette protein subfamily A, member 9, putative;ATP-binding cassette protein subfamily A, member 6, putative;ATP-binding cassette protein subfamily A, member 3, putative (fragment);ATP-binding cassette protein subfamily A, member 7, putative;	15	7814.56	7777.47	0.995253	-0.0020664	2654	3613	0.73457	-0.133967	2.87969e-09	3.89978e-08	0.462342	0.341242	0.738073
Ld1S_150102300	hypothetical protein	15	2130.83	2186.77	1.02625	0.0112539	1455	1143	1.27297	0.104817	0.000514632	0.00197429	0.536411	0.665366	1.2404
Ld1S_150102600	peroxisomal membrane protein (Pex16), putative	15	1854.85	1889.02	1.01842	0.00792765	1376	1110	1.23964	0.0932955	0.000232037	0.000992881	0.598432	0.728421	1.21722
Ld1S_150103100	hypothetical protein	15	3167.82	3251.25	1.02634	0.0112896	1065	1268	0.839905	-0.0757696	0.00332917	0.00992539	0.400276	0.327567	0.818353
Ld1S_150103900	calmodulin-like protein	15	615.226	676.207	1.09912	0.0410448	933	1266	0.736967	-0.132552	9.76845e-09	1.18555e-07	2.05778	1.37976	0.670507
Ld1S_150104100	40S ribosomal protein S3, putative	15	836.194	855.074	1.02258	0.00969687	5832	6933	0.841194	-0.0751037	0.00282044	0.00863123	8.29114	6.82046	0.82262
Ld1S_150104300	NAD/FAD dependent dehydrogenase, putative	15	1346.9	1454.94	1.08021	0.0335097	2185	3265	0.669219	-0.174432	2.96627e-18	2.13693e-16	2.42409	1.50179	0.619525
Ld1S_150104700	glutamate dehydrogenase	15	3039.45	3026.57	0.995761	-0.0018449	9019	6862	1.31434	0.118708	8.87997e-08	8.68143e-07	2.25764	2.97994	1.31994
Ld1S_150104800	solanesyl-diphosphate synthase, putative	15	1180.02	1167	0.988965	-0.00481912	1284	1018	1.2613	0.100817	2.35388e-05	0.00012987	0.862695	1.10026	1.27537
Ld1S_150105000	tryparedoxin peroxidase	15	705.997	756.915	1.07212	0.0302444	231	352	0.65625	-0.182931	2.0585e-06	1.45075e-05	0.498586	0.305186	0.612104
Ld1S_150105200	tryparedoxin peroxidase	15	680.324	731.83	1.07571	0.0316943	1103	1794	0.614827	-0.211247	1.11893e-14	4.63883e-13	2.63698	1.50718	0.571556
Ld1S_150105700	cyclic nucleotide-binding domain containing protein, putative	15	3596	3704.96	1.0303	0.0129636	2406	1596	1.50752	0.178263	6.03458e-10	9.32919e-09	0.443826	0.6494	1.46318
Ld1S_150106100	inositol/phosphatidylinositol phosphatase, putative	15	2373.8	2269.66	0.956127	-0.0194843	911	665	1.36992	0.136697	7.04071e-07	5.54985e-06	0.280141	0.401383	1.43279
Ld1S_150106600	SET domain containing protein, putative	15	1367.07	1303.33	0.95338	-0.0207341	666	815	0.817178	-0.0876834	0.00106462	0.00371161	0.596167	0.510997	0.857138
Ld1S_150107200	Eukaryotic translation initiation factor 4 gamma 2	15	4107.62	4410.61	1.07376	0.0309088	3304	2688	1.22917	0.0896108	0.000133996	0.00060209	0.654394	0.749102	1.14473
Ld1S_150107400	hypothetical protein	15	1229.54	1267.34	1.03075	0.013153	466	370	1.25946	0.100184	0.00110766	0.00384183	0.300927	0.367699	1.22189
Ld1S_150108100	nucleolar RNA binding protein, putative	15	1360.65	1374.23	1.00998	0.00431229	3117	2403	1.29713	0.112983	0.000558607	0.00211986	1.76607	2.26818	1.28431
Ld1S_150109300	cAMP specific phosphodiesterase, putative	15	2720.38	3015.66	1.10854	0.0447532	604	958	0.63048	-0.200329	5.20505e-10	8.16914e-09	0.352157	0.200288	0.568746
Ld1S_150109600	hypothetical protein	15	488.697	511.518	1.0467	0.0198213	682	860	0.793023	-0.100714	0.000114295	0.000524017	1.75978	1.33329	0.757643
Ld1S_150109700	hypothetical protein	15	425.432	484.251	1.13826	0.0562406	1973	3011	0.655264	-0.183584	1.13511e-09	1.66552e-08	7.07751	4.07433	0.575673
Ld1S_150110100	protein kinase, putative	15	1124.09	1180.09	1.04981	0.0211124	1035	1273	0.81304	-0.0898881	0.000458115	0.00179631	1.13247	0.877052	0.774461
Ld1S_150110300	hypothetical protein	15	1635.71	1807.22	1.10485	0.0433033	501	385	1.3013	0.114377	0.000723669	0.00265789	0.235371	0.277222	1.17781
Ld1S_160110600	AAA domain containing protein, putative	16	638.148	640.215	1.00324	0.00140451	369	511	0.722114	-0.141395	2.1556e-05	0.000120061	0.800755	0.576369	0.719782
Ld1S_160110900	DEAD/DEAH box helicase/Helicase conserved C-terminal domain containing protein, putative	16	1770.49	1834.48	1.03614	0.0154194	599	470	1.27447	0.105329	0.00011639	0.000532685	0.265463	0.326522	1.23001
Ld1S_160111100	hypothetical protein	16	1064.5	1136.46	1.06761	0.0284111	582	779	0.747112	-0.126614	1.33741e-05	7.79475e-05	0.731801	0.512115	0.699801
Ld1S_160111700	hypothetical protein	16	2177.59	2055.89	0.944112	-0.0249766	648	528	1.22727	0.0889411	0.00237183	0.00743968	0.24247	0.315192	1.29992
Ld1S_160111800	hypothetical protein	16	675.74	619.493	0.916762	-0.0377435	237	337	0.703264	-0.152882	5.28805e-06	3.39742e-05	0.498712	0.382571	0.767118
Ld1S_160112100	50S ribosomal protein L17, putative	16	901.292	858.346	0.952351	-0.0212031	942	1287	0.731935	-0.135528	0.00031682	0.00130791	1.42795	1.09746	0.768556
Ld1S_160112500	mitochondrial ornithine carrier protein-like protein	16	787.599	723.105	0.918113	-0.037104	625	796	0.785176	-0.105033	0.000140284	0.000626183	1.01067	0.864328	0.855206
Ld1S_160112700	hypothetical protein	16	463.024	423.175	0.913936	-0.039084	566	829	0.68275	-0.165738	1.67723e-07	1.54358e-06	1.7904	1.33751	0.747044
Ld1S_160113000	protein tyrosine phosphatase-likie protein	16	523.538	524.606	1.00204	0.000884615	535	666	0.803303	-0.0951204	0.000832348	0.0030041	1.27211	1.01981	0.801669
Ld1S_160113100	Ankyrin repeats (many copies)/Alpha/beta hydrolase family, putative	16	1550.44	1433.12	0.924331	-0.0341726	1294	1741	0.743251	-0.128864	1.32969e-06	9.77145e-06	1.1229	0.902924	0.804096
Ld1S_160113300	inositol 1,4,5-trisphosphate receptor, putative	16	7549.58	7312.85	0.968643	-0.0138364	1269	1773	0.715736	-0.145247	4.06727e-05	0.000210898	0.234847	0.17353	0.738906
Ld1S_160113400	proteasome 26S non-ATPase subunit 9, putative	16	766.511	729.649	0.951909	-0.0214045	909	1501	0.605596	-0.217817	4.58027e-07	3.81574e-06	1.95822	1.2458	0.636191
Ld1S_160113500	protein kinase, putative	16	1532.11	1426.58	0.931123	-0.0309931	1064	1333	0.7982	-0.0978885	3.88741e-06	2.56565e-05	0.870045	0.745841	0.857244
Ld1S_160113700	FHA domain containing protein, putative	16	3426.38	3096.37	0.903687	-0.0439821	1010	773	1.3066	0.116142	2.58838e-05	0.000141476	0.225603	0.326188	1.44585
Ld1S_160114100	hypothetical protein	16	1868.6	1729.78	0.925709	-0.0335253	959	1348	0.711424	-0.147871	8.24439e-08	8.14157e-07	0.721396	0.554406	0.768518
Ld1S_160114300	tubulin tyrosine ligase, putative	16	2419.64	2172.59	0.897895	-0.0467744	995	801	1.2422	0.0941906	0.00022553	0.00096881	0.33104	0.457979	1.38345
Ld1S_160114500_pseudogene	hypothetical protein	16	1089.25	1112.47	1.02131	0.00915938	433	679	0.637703	-0.195382	1.03711e-10	1.88329e-09	0.623363	0.389224	0.624394
Ld1S_160115100	60S ribosomal protein L21, putative	16	608.808	496.249	0.815115	-0.088781	3096	3889	0.796092	-0.099037	0.000619336	0.0023173	6.38789	6.23881	0.976661
Ld1S_160115800_pseudogene	dihydroorotate dehydrogenase	16	869.202	847.44	0.974963	-0.0110117	1614	1902	0.84858	-0.071307	0.00314805	0.0094754	2.18822	1.90456	0.870372
Ld1S_160116500	dihydroorotase, putative	16	1106.67	1170.27	1.05747	0.0242681	415	318	1.30503	0.115621	0.000789131	0.00286598	0.287348	0.354618	1.23411
Ld1S_160117200	RING-H2 zinc finger, putative	16	425.432	404.633	0.951112	-0.0217684	239	413	0.578692	-0.237552	3.50557e-10	5.75896e-09	0.970778	0.590658	0.608438
Ld1S_160118100	ubiquitin hydrolase, putative	16	5025.42	4622.2	0.919765	-0.0363232	1524	1293	1.17865	0.0713864	0.00261929	0.0080832	0.257292	0.329713	1.28147
Ld1S_160118400	transaldolase, putative	16	993.897	953.233	0.959087	-0.0181422	2559	3211	0.796948	-0.09857	7.0829e-05	0.000344693	3.23072	2.68455	0.830945
Ld1S_160118600	hypothetical protein	16	2051.98	1943.55	0.94716	-0.0235767	1136	915	1.24153	0.0939572	0.00252679	0.0078418	0.445912	0.584498	1.31079
Ld1S_160118900	membrane transport protein, putative	16	1988.71	1858.48	0.934514	-0.0294143	1540	1928	0.798755	-0.0975863	6.65456e-06	4.18062e-05	0.969472	0.828635	0.854728
Ld1S_160119300	hypothetical protein	16	2382.05	2216.21	0.93038	-0.0313398	614	448	1.37054	0.13689	1.82393e-06	1.30012e-05	0.188073	0.277049	1.47309
Ld1S_160119900	hypothetical protein	16	829.776	824.536	0.993685	-0.00275114	378	516	0.732558	-0.135158	8.63685e-06	5.28248e-05	0.621855	0.45844	0.737213
Ld1S_160120100	flagellar calcium-binding protein, putative	16	398.843	382.82	0.959828	-0.0178065	177	316	0.560127	-0.251714	5.3702e-09	6.92063e-08	0.792293	0.462358	0.58357
Ld1S_160120200	flagellar calcium-binding protein, putative	16	457.523	447.169	0.97737	-0.00994104	312	655	0.476336	-0.322087	8.66973e-23	1.2095e-20	1.43162	0.697723	0.487365
Ld1S_160120400	dynein light chain, putative	16	373.17	406.815	1.09016	0.0374901	655	1237	0.529507	-0.276128	1.18729e-14	4.87623e-13	3.31484	1.61007	0.485715
Ld1S_160120500	sucrose-phosphate synthase-like protein	16	1278.13	1199.72	0.938654	-0.0274944	2530	3344	0.756579	-0.121146	1.11028e-05	6.63467e-05	2.61632	2.10882	0.806025
Ld1S_160121000	Protein of unknown function (DUF3184), putative	16	2589.27	2405.99	0.929216	-0.0318835	40	87	0.45977	-0.337459	1.19138e-08	1.4218e-07	0.0336002	0.0166252	0.494794
Ld1S_160121400	Protein of unknown function (DUF3184), putative	16	2636.94	2520.51	0.955843	-0.0196133	94	239	0.393305	-0.40527	1.01662e-15	4.96392e-14	0.0906352	0.0372941	0.411475
Ld1S_160121500	Protein of unknown function (DUF3184), putative	16	2857	2663.38	0.932232	-0.0304761	589	730	0.806849	-0.0932076	0.00195469	0.00627688	0.255513	0.221147	0.865503
Ld1S_160121700_pseudogene	ubiquitin fold modifier protein, putative	16	736.254	713.289	0.968808	-0.0137621	663	917	0.72301	-0.140856	1.14278e-05	6.80478e-05	1.24549	0.929497	0.746288
Ld1S_160122400_pseudogene	hypothetical protein	16	803.186	748.19	0.931527	-0.0308043	289	390	0.741026	-0.130167	0.00158215	0.00522176	0.485566	0.386265	0.795495
Ld1S_160122500	tyrosyl or methionyl-tRNA synthetase-like protein	16	552.878	542.056	0.980426	-0.00858528	283	188	1.50532	0.177629	2.1317e-06	1.49049e-05	0.340039	0.522086	1.53537
Ld1S_160122600	tRNA-Gln	16	207.215	201.771	0.973731	-0.0115611	15	77	0.194805	-0.710399	5.09524e-14	1.77707e-12	0.371595	0.0743416	0.200061
Ld1S_160122800	hypothetical protein	16	373.17	344.647	0.923567	-0.0345317	503	812	0.619458	-0.207988	8.90897e-10	1.32714e-08	2.17595	1.45946	0.670724
Ld1S_160122900	hypothetical protein	16	716.083	722.014	1.00828	0.0035826	658	1148	0.573171	-0.241716	1.16356e-19	9.83317e-18	1.60317	0.911339	0.568462
Ld1S_160123200	coatomer delta subunit-like protein	16	1697.14	1511.65	0.890702	-0.0502675	1992	2873	0.693352	-0.159046	2.29449e-06	1.59543e-05	1.69284	1.31777	0.778433
Ld1S_160123700	hypothetical protein	16	5061.17	4856.69	0.959598	-0.0179107	3203	2693	1.18938	0.0753206	0.00298622	0.00905343	0.53209	0.659502	1.23946
Ld1S_160124200	hypothetical protein	16	330.077	335.922	1.01771	0.00762386	429	608	0.705592	-0.151446	2.3383e-06	1.61822e-05	1.842	1.27708	0.693314
Ld1S_160124500	cytochrome c, putative	16	419.931	383.911	0.914224	-0.0389472	399	505	0.790099	-0.102318	0.00334766	0.00996364	1.20258	1.0393	0.864229
Ld1S_160124600	cytochrome c, putative	16	443.77	389.364	0.877402	-0.0568015	701	512	1.36914	0.136448	8.64403e-05	0.000410661	1.15375	1.80037	1.56045
Ld1S_160124900	DNA-directed rna polymerase I largest subunit, putative	16	5032.75	4841.42	0.961983	-0.0168324	1780	1404	1.26781	0.103053	0.000522136	0.00199872	0.278973	0.367661	1.31791
Ld1S_160125000	amidase, putative	16	1754.91	1677.43	0.955851	-0.01961	1188	1427	0.832516	-0.0796075	0.00213869	0.00679325	0.813148	0.708227	0.870968
Ld1S_160125200	ADP-ribosylation factor-like, putative	16	523.538	508.246	0.97079	-0.0128745	566	717	0.7894	-0.102703	0.00159869	0.00526637	1.36953	1.11363	0.813152
Ld1S_160125400	EMG1/NEP1 methyltransferase, putative	16	861.867	774.366	0.898475	-0.0464939	315	220	1.43182	0.155888	2.95652e-05	0.000159612	0.25526	0.406784	1.59361
Ld1S_160127000	hypothetical protein	16	379.588	414.449	1.09184	0.0381589	556	693	0.802309	-0.0956584	0.000928556	0.00329741	1.82566	1.34154	0.734823
Ld1S_160127800	u1 small nuclear ribonucleoprotein 70 kDa	16	1012.23	1030.67	1.01821	0.00783838	1001	1281	0.781421	-0.107115	7.67375e-05	0.000370168	1.26552	0.971213	0.767444
Ld1S_160127900	eukaryotic translation initiation factor 4 gamma 3	16	1725.57	1740.69	1.00876	0.00378892	929	748	1.24198	0.0941141	0.000580504	0.00218503	0.433481	0.533697	1.23119
Ld1S_160128100	WD domain, G-beta repeat, putative	16	1189.19	1242.26	1.04462	0.0189594	788	642	1.22741	0.0889912	0.0017919	0.00581789	0.539862	0.634329	1.17498
Ld1S_160128500	Flagellar Member 3	16	11054.8	11135.6	1.00731	0.00316213	1472	2192	0.671533	-0.172933	9.45634e-07	7.22711e-06	0.198285	0.132189	0.666661
Ld1S_170128900	Protein of unknown function (DUF3522), putative	17	614.309	677.297	1.10254	0.0423924	190	323	0.588235	-0.230449	5.74937e-10	8.99132e-09	0.525794	0.280527	0.53353
Ld1S_170129200	DnaJ domain containing protein, putative	17	770.179	809.267	1.05075	0.0215003	595	729	0.816187	-0.0882106	0.00312875	0.00943377	0.946534	0.735233	0.776764
Ld1S_170129300	hypothetical protein	17	688.576	682.751	0.99154	-0.00368996	996	1296	0.768519	-0.114346	1.8132e-06	1.29457e-05	1.88214	1.4588	0.775076
Ld1S_170129500	ADP-ribosylation factor, putative	17	556.546	632.581	1.13662	0.0556149	355	466	0.761803	-0.118158	0.00033631	0.00137161	0.837308	0.561193	0.670236
Ld1S_170131200	receptor-type adenylate cyclase b (fragment);receptor-type adenylate cyclase, putative (fragment);receptor-type adenylate cyclase a (fragment)	17	3745.45	3551.18	0.94813	-0.023132	2841	4739	0.599494	-0.222215	2.46733e-08	2.77306e-07	1.26527	0.800017	0.63229
Ld1S_170131400	receptor-type adenylate cyclase b (fragment);receptor-type adenylate cyclase, putative (fragment);receptor-type adenylate cyclase a (fragment)	17	3713.36	3763.85	1.0136	0.00586558	363	818	0.443765	-0.352847	3.70167e-23	5.60931e-21	0.220286	0.0964437	0.437812
Ld1S_170131500	receptor-type adenylate cyclase b (fragment);receptor-type adenylate cyclase, putative (fragment);receptor-type adenylate cyclase a (fragment)	17	3932.5	3775.85	0.960167	-0.0176533	417	540	0.772222	-0.112258	0.00153836	0.00509446	0.137317	0.110439	0.804258
Ld1S_170132500	WD domain, G-beta repeat, putative	17	1718.23	1826.85	1.06321	0.0266209	689	1059	0.650614	-0.186677	5.77048e-08	5.95267e-07	0.616331	0.377152	0.611931
Ld1S_170132600	Regulator of chromosome condensation (RCC1) repeat, putative	17	3099.97	2862.97	0.923549	-0.0345402	1016	861	1.18002	0.0718906	0.00325187	0.00974932	0.277745	0.354876	1.27771
Ld1S_170132900	NADH-ubiquinone oxidoreductase, mitochondrial, putative	17	865.534	748.19	0.864426	-0.0632722	539	686	0.785714	-0.104735	0.000185103	0.000806577	0.792574	0.720405	0.908943
Ld1S_170133000	histone H2A variant Z	17	576.717	584.592	1.01365	0.00588979	635	930	0.682796	-0.165709	3.52859e-08	3.82873e-07	1.61258	1.08623	0.673598
Ld1S_170133400	hypothetical protein	17	983.812	981.59	0.997742	-0.000981565	203	261	0.777778	-0.109144	0.00164182	0.0053803	0.265295	0.206807	0.779538
Ld1S_170133600_pseudogene	hypothetical protein	17	534.541	479.889	0.897759	-0.0468402	1580	2295	0.688453	-0.162126	4.33372e-10	6.96326e-09	4.29341	3.29243	0.766857
Ld1S_170134100	protein kinase, putative	17	3139.39	3066.92	0.976916	-0.0101428	427	881	0.484677	-0.314548	2.20949e-22	2.98756e-20	0.280627	0.139227	0.496129
Ld1S_170135000_pseudogene	Phenazine biosynthesis-like protein, putative	17	1441.33	1511.65	1.04878	0.0206863	515	668	0.770958	-0.112969	0.00198371	0.00635844	0.463459	0.340687	0.735097
Ld1S_170136100	hypothetical protein	17	4684.34	4534.95	0.968109	-0.0140758	997	1248	0.798878	-0.0975194	0.000269017	0.00113074	0.26642	0.219848	0.825195
Ld1S_170136200	calcium-transporting ATPase, putative;P-type ATPase, putative	17	3071.55	2953.5	0.961567	-0.0170205	1880	2389	0.78694	-0.104058	1.66476e-05	9.49488e-05	0.777784	0.636534	0.818394
Ld1S_170136300	Acyl CoA binding protein, putative	17	1394.57	1337.14	0.95882	-0.0182631	226	353	0.640227	-0.193666	1.97869e-07	1.78733e-06	0.253124	0.169017	0.667724
Ld1S_170136400	Acyl CoA binding protein, putative	17	302.57	296.658	0.980462	-0.00856939	377	549	0.686703	-0.163231	9.28954e-06	5.63074e-05	1.81446	1.27082	0.700388
Ld1S_170136800	hypothetical protein	17	1177.27	1097.2	0.931984	-0.0305914	112	164	0.682927	-0.165626	0.00136167	0.00459943	0.139305	0.102078	0.732766
Ld1S_170137800	VID27 cytoplasmic protein, putative	17	1521.1	1428.76	0.939292	-0.0271994	975	1178	0.827674	-0.0821407	0.00074837	0.00273603	0.774438	0.68241	0.881168
Ld1S_170138600	hypothetical protein	17	2216.1	2146.41	0.968555	-0.0138759	647	521	1.24184	0.0940666	0.000563051	0.00213304	0.235098	0.301433	1.28216
Ld1S_170139000	OSM3-like kinesin, putative	17	2448.98	2379.81	0.971754	-0.0124435	1398	1879	0.744013	-0.12842	3.93301e-05	0.000204782	0.767257	0.587441	0.765639
Ld1S_170139500	hypothetical protein	17	1404.66	1281.52	0.912336	-0.0398453	895	735	1.21769	0.0855357	0.00172816	0.00562965	0.523259	0.698389	1.33469
Ld1S_170139700	hypothetical protein	17	478.611	461.348	0.96393	-0.0159545	1197	1999	0.598799	-0.222719	1.10027e-12	2.9393e-11	4.17667	2.59457	0.621206
Ld1S_170139800	META domain containing protein	17	1175.44	1097.2	0.933438	-0.0299144	4216	5757	0.732326	-0.135296	1.37088e-08	1.61295e-07	4.89774	3.84251	0.784547
Ld1S_170140000	META domain containing protein, putative	17	372.253	319.562	0.858454	-0.0662828	2401	5954	0.403258	-0.394417	1.69302e-32	7.43998e-30	15.9945	7.5134	0.469749
Ld1S_170140300	ATP-dependent RNA helicase, putative	17	6408.07	6100.04	0.951931	-0.0213946	2739	2121	1.29137	0.111051	1.78988e-05	0.000101558	0.330989	0.449013	1.35658
Ld1S_170140500	Phosphorylated CTD interacting factor 1 WW domain containing protein, putative	17	2921.18	2805.17	0.960287	-0.0175992	881	745	1.18255	0.0728196	0.00254109	0.0078834	0.255034	0.314063	1.23146
Ld1S_170140800	Mak10 subunit, NatC N(alpha)-terminal acetyltransferase, putative	17	1961.2	1962.09	1.00045	0.000196026	1984	1562	1.27017	0.103861	4.18464e-05	0.000216346	0.796449	1.01117	1.26959
Ld1S_170140900	hypothetical protein	17	322.742	334.831	1.03746	0.0159714	282	362	0.779006	-0.108459	0.0023429	0.00736999	1.12164	0.842215	0.750878
Ld1S_170141400	hypothetical protein	17	429.1	423.175	0.986192	-0.00603848	308	486	0.633745	-0.198086	0.000116428	0.000532685	1.1326	0.727832	0.642618
Ld1S_170141500	hypothetical protein	17	2226.18	2426.71	1.09008	0.037457	369	527	0.70019	-0.154784	0.000117478	0.000536156	0.236728	0.152058	0.642331
Ld1S_170142200	3-oxo-5-alpha-steroid 4-dehydrogenase-like protein	17	1563.28	1486.56	0.950927	-0.0218529	599	723	0.828492	-0.0817115	0.00104354	0.0036439	0.462489	0.402943	0.871247
Ld1S_170142500	NOL1/NOP2/sun family, putative	17	3425.46	3141.09	0.916983	-0.0376387	560	407	1.37592	0.138594	1.30747e-05	7.64562e-05	0.118816	0.178282	1.50049
Ld1S_170142600	hypothetical protein	17	421.764	375.186	0.889562	-0.0508237	215	292	0.736301	-0.132944	0.000416407	0.00164634	0.69233	0.57305	0.827712
Ld1S_170143800	RNA cytidine acetyltransferase	17	2801.07	2772.45	0.989783	-0.00446002	1419	1063	1.3349	0.125449	2.19855e-06	1.53236e-05	0.379498	0.511822	1.34868
Ld1S_170143900	Organic solute transport protein 1, putative	17	1198.36	1218.26	1.01661	0.00715323	717	856	0.837617	-0.0769546	0.00155942	0.00515834	0.714309	0.588543	0.823933
Ld1S_170144000	hypothetical protein	17	910.461	931.42	1.02302	0.00988427	679	862	0.787703	-0.103637	9.40127e-05	0.000442333	0.946773	0.728994	0.769978
Ld1S_170144200	eukaryotic translation initiation factor 3 subunit b	17	1864.93	1882.47	1.00941	0.00406549	4481	3708	1.20847	0.0822352	0.00243342	0.00759222	1.98828	2.38038	1.19721
Ld1S_170144400	methyltransferase domain containing protein, putative	17	2923.93	2883.69	0.98624	-0.00601742	775	636	1.21855	0.0858446	0.00330725	0.00988687	0.217516	0.268752	1.23555
Ld1S_170144700	hypothetical protein	17	826.108	771.094	0.933405	-0.0299297	728	1052	0.692015	-0.159884	3.37101e-11	7.05423e-10	1.27344	0.944113	0.741388
Ld1S_170144900	cytochrome b5-like Heme/Steroid binding domain containing protein, putative	17	557.463	502.792	0.90193	-0.044827	413	550	0.750909	-0.124413	5.09842e-06	3.2876e-05	0.986613	0.821412	0.832558
Ld1S_170145200	NUC130/3NT domain/SDA1, putative	17	2347.21	2262.02	0.963706	-0.0160556	911	751	1.21305	0.0838784	0.00113923	0.00393736	0.319954	0.402737	1.25873
Ld1S_170146200	ion transport protein, putative	17	3811.47	3674.42	0.964044	-0.0159034	961	1434	0.670153	-0.173826	1.53362e-10	2.6691e-09	0.376233	0.261538	0.695149
Ld1S_180146800	RNA-binding protein 27, putative	18	902.209	894.338	0.991276	-0.0038056	1079	1539	0.701105	-0.154217	7.09576e-05	0.000345128	1.70581	1.20648	0.707275
Ld1S_180147200	zinc-finger of a C2HC-type/Double zinc ribbon, putative	18	2023.55	2100.6	1.03808	0.0162296	419	539	0.777365	-0.109375	0.00154257	0.00510646	0.266363	0.199466	0.748851
Ld1S_180147300	3-beta hydroxysteroid dehydrogenase/isomerase family, putative	18	1247.87	1362.23	1.09164	0.03808	850	1129	0.752879	-0.123275	6.83363e-06	4.27783e-05	0.90474	0.623977	0.689676
Ld1S_180147700	ADP-ribosylation factor-like protein 2-binding protein, putative	18	413.513	377.367	0.912589	-0.0397248	501	667	0.751124	-0.124288	0.000312209	0.00129191	1.61301	1.32762	0.82307
Ld1S_180147800	Domain of unknown function DUF21, putative	18	1872.27	1781.04	0.951275	-0.0216939	742	894	0.829978	-0.0809336	0.000409526	0.00162424	0.477496	0.41661	0.87249
Ld1S_180148400	RNA recognition motif. (a.k.a. RRM, RBD, or RNP domain), putative	18	882.038	877.978	0.995397	-0.00200354	9	29	0.310345	-0.508155	6.46333e-06	4.07505e-05	0.0328784	0.0102508	0.31178
Ld1S_180148900	hypothetical protein	18	991.147	959.777	0.968351	-0.0139674	292	382	0.764398	-0.116681	0.000348127	0.00141325	0.385412	0.304237	0.789381
Ld1S_180149000	hypothetical protein	18	480.445	431.9	0.898958	-0.0462605	269	342	0.78655	-0.104274	0.0026715	0.00822121	0.71184	0.62283	0.874957
Ld1S_180149100	hypothetical protein	18	407.094	399.18	0.980559	-0.00852624	359	458	0.783843	-0.105771	0.00141654	0.00474285	1.12505	0.899343	0.799384
Ld1S_180149600	hypothetical protein	18	345.664	304.293	0.880316	-0.0553615	412	507	0.812623	-0.0901107	0.00261552	0.00808184	1.46674	1.35396	0.923104
Ld1S_180150700	hypothetical protein	18	400.676	408.996	1.02076	0.00892548	487	691	0.704776	-0.151949	3.22759e-08	3.54591e-07	1.72458	1.19072	0.690439
Ld1S_180150800	PAP2 superfamily, putative	18	1091.09	953.233	0.873655	-0.0586599	555	797	0.696361	-0.157165	8.42508e-07	6.54713e-06	0.730465	0.582229	0.797066
Ld1S_180150900_pseudogene	phosphatidic acid phosphatase, putative	18	1157.1	1221.53	1.05568	0.0235343	579	754	0.767905	-0.114693	2.26289e-05	0.000125322	0.651628	0.473994	0.727399
Ld1S_180151400	btb/poz domain containing protein, putative	18	867.368	772.185	0.890262	-0.0504822	700	896	0.78125	-0.10721	2.10168e-05	0.000117239	1.03301	0.906519	0.877551
Ld1S_180151700	hypothetical protein	18	1970.37	1891.2	0.959817	-0.0178117	1672	1983	0.843167	-0.0740864	0.000657177	0.00243505	1.00641	0.884096	0.878467
Ld1S_180152000	hypothetical protein	18	974.643	1041.58	1.06868	0.0288458	1531	1990	0.769347	-0.113878	1.65746e-07	1.52859e-06	2.04177	1.46989	0.719907
Ld1S_180152500	hypothetical protein	18	342.913	344.647	1.00506	0.00219113	709	1022	0.693738	-0.158805	6.93354e-10	1.06351e-08	2.98035	2.05718	0.690246
Ld1S_180153300	PA26 p53-induced protein (sestrin), putative	18	3446.55	3369.04	0.97751	-0.00987877	946	776	1.21907	0.0860294	0.000275759	0.00115302	0.225153	0.280792	1.24712
Ld1S_180153600	citrate synthase, putative (fragment)	18	1383.57	1345.87	0.972751	-0.0119984	729	897	0.812709	-0.0900649	0.00138462	0.0046537	0.648322	0.541657	0.835475
Ld1S_180154900	GCN1 general control of amino-acid synthesis 1-like 1 (Yeast). Translation, ribosomal structure and biogenesis	18	7429.47	6963.84	0.937326	-0.0281093	3159	2392	1.32065	0.120788	4.63741e-08	4.91655e-07	0.321961	0.453629	1.40896
Ld1S_180155000	Periodic tryptophan protein 2 homolog, putative	18	2390.3	2410.35	1.00839	0.00362689	926	612	1.51307	0.17986	3.77278e-10	6.1292e-09	0.256034	0.384177	1.50049
Ld1S_180155700	rab7 GTP binding protein, putative	18	735.337	718.742	0.977432	-0.00991331	779	960	0.811458	-0.0907338	0.000982791	0.00345648	1.30552	1.08384	0.830194
Ld1S_180156000	actin-related protein 2/3 complex subunit 1, putative	18	1699.89	1717.78	1.01052	0.00454648	679	839	0.809297	-0.0918922	0.00315027	0.00947885	0.49356	0.395277	0.800869
Ld1S_180156200	Nrap protein, putative	18	3522.65	3408.3	0.967539	-0.0143317	1217	810	1.50247	0.176806	1.86428e-09	2.63852e-08	0.229941	0.357069	1.55288
Ld1S_180156700	UDP-glucose pyrophosphorylase	18	1381.74	1273.89	0.921945	-0.0352948	1456	1838	0.792165	-0.101184	5.50917e-06	3.52916e-05	1.33021	1.14296	0.859232
Ld1S_180156900	Outer arm dynein light chain 7	18	379.588	357.735	0.94243	-0.0257509	505	953	0.529906	-0.275802	4.90097e-21	5.25301e-19	2.51062	1.41166	0.562276
Ld1S_180157500_pseudogene	cysteine peptidase, Clan CA, family C2, putative	18	1998.8	1946.82	0.973996	-0.0114426	1753	2263	0.774635	-0.110903	1.50027e-05	8.65216e-05	1.13218	0.900442	0.795316
Ld1S_180158000	Multisite-specific tRNA:(cytosine-C(5))-methyltransferase, putative	18	2178.51	2136.6	0.980762	-0.00843635	561	390	1.43846	0.157898	6.34976e-06	4.01496e-05	0.179022	0.262567	1.46668
Ld1S_180158200	Ras-related protein Rab5A, putative	18	800.436	855.074	1.06826	0.0286775	622	844	0.736967	-0.132552	1.27888e-05	7.50336e-05	1.05443	0.727422	0.689875
Ld1S_180158600	hypothetical protein	18	647.317	624.946	0.965441	-0.0152744	720	896	0.803571	-0.0949755	0.00108129	0.00376524	1.38418	1.1521	0.832336
Ld1S_180159700	mitochondrial carrier protein, putative	18	1069.08	985.953	0.922243	-0.0351545	231	304	0.759868	-0.119262	0.00206398	0.00657734	0.284356	0.234291	0.823935
Ld1S_180160200	hypothetical protein	18	1674.22	1536.73	0.91788	-0.0372141	125	231	0.541126	-0.266702	0.00131978	0.00446651	0.137975	0.0813413	0.589538
Ld1S_180160600	hypothetical protein	18	770.179	686.023	0.890732	-0.050253	769	995	0.772864	-0.111897	0.000638092	0.00238039	1.29191	1.12095	0.867673
Ld1S_180160700	60S ribosomal protein L34, putative	18	617.977	579.138	0.937153	-0.0281897	4157	5463	0.760937	-0.118651	0.000267665	0.00112722	8.84014	7.1779	0.811967
Ld1S_180161500	hypothetical protein	18	1089.25	1015.4	0.9322	-0.0304911	667	877	0.760547	-0.118874	5.90853e-07	4.73814e-06	0.805139	0.656883	0.815863
Ld1S_180161600	NADH-ubiquinone oxidoreductase complex I subunit, putative	18	877.454	897.61	1.02297	0.00986354	342	423	0.808511	-0.0923143	0.00217618	0.00689737	0.482077	0.381012	0.790355
Ld1S_180162200	UAA transporter family, putative	18	931.549	1011.04	1.08533	0.0355617	887	1098	0.807832	-0.0926787	0.000254595	0.00107994	1.17868	0.877316	0.74432
Ld1S_180162600	nonspecific nucleoside hydrolasewith	18	846.28	774.366	0.915024	-0.0385677	4469	6913	0.646463	-0.189456	8.24509e-22	1.00647e-19	8.16869	5.77117	0.706499
Ld1S_180162900	Noc2p family, putative	18	1642.13	1530.19	0.931832	-0.0306623	889	601	1.4792	0.170027	7.45412e-10	1.13151e-08	0.365988	0.580973	1.58741
Ld1S_180163000	Got1/Sft2-like family, putative	18	547.377	470.073	0.858773	-0.0661214	330	443	0.744921	-0.12789	0.000373729	0.00149987	0.809314	0.702019	0.867424
Ld1S_180163100	hypothetical protein	18	672.989	556.235	0.826513	-0.0827502	720	906	0.794702	-0.0997957	0.000486344	0.00188635	1.34623	1.29442	0.961512
Ld1S_180163300	hypothetical protein	18	395.175	400.271	1.0129	0.00556444	1555	2434	0.638866	-0.19459	1.57353e-15	7.51618e-14	6.1593	3.88487	0.630733
Ld1S_180163600	hypothetical protein	18	366.752	330.469	0.901069	-0.0452417	326	423	0.770686	-0.113123	0.000808878	0.00292923	1.15337	0.986477	0.855301
Ld1S_190164200	histone H2B	19	422.681	391.546	0.926337	-0.0332308	2032	2777	0.731725	-0.135652	0.00043347	0.00170689	6.56996	5.18969	0.789912
Ld1S_190164400_pseudogene	peroxin 13, putative	19	1293.72	1305.52	1.00912	0.00394278	937	720	1.30139	0.114407	9.21174e-06	5.5913e-05	0.556536	0.717724	1.28963
Ld1S_190164700	fibrillarin, putative;fibrillarin	19	863.7	739.465	0.856159	-0.0674456	2940	2298	1.27937	0.106997	0.000920819	0.00327522	2.66065	3.97585	1.49432
Ld1S_190165100	Associated kinase of Tb14-3-3, putative	19	1606.37	1608.72	1.00146	0.000633566	1299	1101	1.17984	0.0718218	0.00180162	0.00584512	0.685395	0.807475	1.17812
Ld1S_190165300	metallo-peptidase, Clan MG, Family M24	19	1009.48	921.604	0.912946	-0.039555	5053	4361	1.15868	0.0639632	0.00141878	0.00474853	4.32003	5.48283	1.26917
Ld1S_190165600	multiprotein-bridging factor 1, putative	19	518.954	531.15	1.0235	0.0100882	1405	1917	0.732916	-0.134946	4.77149e-08	5.02235e-07	3.69397	2.64521	0.716087
Ld1S_190166000	Complex 1 protein (LYR family), putative	19	1706.31	1606.54	0.941525	-0.026168	1238	1481	0.835922	-0.0778344	0.00245389	0.00764524	0.867954	0.770602	0.887838
Ld1S_190166100	GNL3L/Grn1 putative GTPase, putative	19	1818.17	1694.88	0.932189	-0.0304961	779	522	1.49234	0.173867	3.78308e-09	5.03018e-08	0.287102	0.45962	1.6009
Ld1S_190166200	centrosomal protein of 104 kDa	19	2381.14	2362.36	0.992115	-0.00343785	395	253	1.56126	0.193477	3.43321e-07	2.93812e-06	0.106252	0.167206	1.57367
Ld1S_190166500	Sarcalumenin, putative;Dynamin family, putative	19	1495.43	1478.93	0.988966	-0.00481862	1019	818	1.24572	0.0954209	3.35737e-05	0.00017867	0.547	0.689012	1.25962
Ld1S_190166600	hypothetical protein	19	3470.39	3465.01	0.998452	-0.000673022	436	318	1.37107	0.137059	7.54206e-06	4.67799e-05	0.0916324	0.125829	1.3732
Ld1S_190167200	hypothetical protein	19	1209.36	1199.72	0.992027	-0.00347646	747	606	1.23267	0.090848	0.00132649	0.00448405	0.50109	0.622644	1.24258
Ld1S_190167800	Vesicle-trafficking protein SEC22, putative	19	708.748	770.003	1.08643	0.0360009	1239	1545	0.801942	-0.0958572	0.000402427	0.00160187	2.1799	1.60908	0.738145
Ld1S_190168600	hypothetical protein	19	736.254	591.136	0.802896	-0.0953406	224	140	1.6	0.20412	1.53472e-05	8.82766e-05	0.190152	0.378932	1.99279
Ld1S_190169000	hypothetical protein	19	1631.13	1592.36	0.976231	-0.0104474	2146	2931	0.732173	-0.135386	1.44535e-07	1.3471e-06	1.79692	1.34769	0.75
Ld1S_190169500	hypothetical protein	19	1399.16	1242.26	0.887861	-0.0516552	119	207	0.574879	-0.240423	5.91703e-07	4.74063e-06	0.147946	0.0957934	0.647488
Ld1S_190169900	hypothetical protein	19	302.57	304.293	1.00569	0.00246591	648	878	0.738041	-0.13192	4.43082e-07	3.70528e-06	2.90181	2.12953	0.733862
Ld1S_190170300	ATPdependent RNA helicase. RNA processing and modification	19	4973.15	4790.16	0.963204	-0.0162817	1956	1372	1.42566	0.154015	4.83009e-10	7.63519e-09	0.275881	0.408337	1.48012
Ld1S_190170400	DNA-directed RNA polymerases I and III subunit RPAC1, putative	19	1204.78	1225.9	1.01753	0.00754659	475	278	1.70863	0.232649	1.06477e-10	1.92557e-09	0.230748	0.387471	1.6792
Ld1S_190170900	glycosomal malate dehydrogenase	19	942.552	958.687	1.01712	0.00737141	2626	3498	0.750715	-0.124525	3.26099e-06	2.19287e-05	3.7112	2.73916	0.73808
Ld1S_190171200	Vacuolar protein sorting protein 36 Vps36/EAP30/Vps36 family, putative	19	1248.79	1222.63	0.979048	-0.00919585	788	934	0.843683	-0.0738207	0.000895742	0.00320158	0.747924	0.644515	0.861738
Ld1S_190171400	transporter, putative	19	1520.19	1388.41	0.913313	-0.0393805	1321	1861	0.709833	-0.148844	1.14459e-10	2.06568e-09	1.22419	0.951451	0.777207
Ld1S_190171700	signal recognition particle protein, putative	19	2018.05	1868.29	0.925791	-0.033487	853	694	1.22911	0.0895896	0.000647999	0.00240916	0.343896	0.456566	1.32763
Ld1S_190172000	ATG8/AUT7/APG8/PAZ2, putative	19	470.359	381.73	0.811571	-0.0906737	62	190	0.326316	-0.486362	1.51317e-26	4.156e-24	0.403947	0.162419	0.402079
Ld1S_190172100	Autophagy protein Atg8 ubiquitin like, putative	19	1063.58	1036.12	0.974185	-0.0113587	192	319	0.601881	-0.220489	1.20975e-06	8.96499e-06	0.29993	0.185306	0.61783
Ld1S_190172200	ATG8/AUT7/APG8/PAZ2, putative	19	403.427	316.29	0.784009	-0.105679	367	880	0.417045	-0.379817	3.40752e-28	1.07013e-25	2.18131	1.16033	0.53194
Ld1S_190173600	folate/biopterin transporter, putative;biopterin transporter, putative;pteridine transporter, putative;folate/biopterin transporter, putative (fragment)	19	1892.44	1759.23	0.929609	-0.0316997	1266	1715	0.738192	-0.13183	0.000308257	0.00127675	0.906238	0.719634	0.794089
Ld1S_190174200	FYVE zinc finger, putative	19	2119.82	2028.62	0.956975	-0.0190992	589	449	1.3118	0.117869	3.58579e-05	0.000189055	0.21181	0.290345	1.37078
Ld1S_190174500	4-coumarate:coa ligase-like protein	19	1626.54	1710.15	1.0514	0.0217681	1447	1802	0.802997	-0.0952863	0.000404294	0.00160858	1.10787	0.846125	0.76374
Ld1S_190174800	hypothetical protein	19	739.922	739.465	0.999383	-0.000268194	969	1174	0.825383	-0.0833443	0.00100668	0.00353625	1.58665	1.31041	0.825893
Ld1S_190175400	hypothetical protein	19	681.241	686.023	1.00702	0.00303748	239	335	0.713433	-0.146647	5.16523e-05	0.000260156	0.491749	0.348385	0.70846
Ld1S_190175800	proteasome regulatory non-ATP-ase subunit 9, putative	19	1296.47	1163.73	0.897616	-0.0469093	1289	1567	0.822591	-0.0848161	0.000505189	0.00194656	1.20867	1.10765	0.916417
Ld1S_190176200	hypothetical protein	19	1121.34	1201.9	1.07184	0.0301308	4232	5056	0.837025	-0.0772614	4.77779e-05	0.000242588	4.50888	3.52108	0.780922
Ld1S_190176700	Fcf1, putative	19	572.133	584.592	1.02178	0.00935585	325	219	1.48402	0.171439	1.44712e-06	1.05462e-05	0.382778	0.555944	1.45239
Ld1S_190177400	SPFH domain / Band 7 family, putative	19	766.511	802.723	1.04724	0.0200472	1651	2370	0.696624	-0.157001	7.28295e-07	5.71517e-06	3.09193	2.05675	0.665199
Ld1S_190177600	Protein kinase domain containing protein, putative	19	2225.27	2272.93	1.02142	0.00920359	786	1197	0.656642	-0.182672	1.09832e-09	1.61695e-08	0.537913	0.34581	0.642872
Ld1S_190177900	glycerol uptake protein, putative (fragment)	19	1537.61	1538.92	1.00085	0.000369598	176	233	0.755365	-0.121843	0.00314711	0.0094754	0.151534	0.114366	0.754722
Ld1S_190178000_pseudogene	glycerol uptake protein, putative (fragment)	19	1991.46	2046.07	1.02742	0.0117487	472	812	0.581281	-0.235614	5.71419e-11	1.12858e-09	0.407741	0.230686	0.565767
Ld1S_190178600	glycerol uptake protein, putative (fragment)	19	2171.17	2068.97	0.952931	-0.0209387	94	149	0.630872	-0.200058	0.00192552	0.00618998	0.0686266	0.0454331	0.662034
Ld1S_190178700	membrane-bound O-acyltransferase, putative	19	2031.8	1937.01	0.953342	-0.0207511	1766	2166	0.815328	-0.0886678	0.000653022	0.00242478	1.06605	0.911717	0.855231
Ld1S_190178800	phosphatidic acid phosphatase protein-like protein	19	1141.51	1129.92	0.989842	-0.00443395	937	1255	0.746614	-0.126904	5.57317e-06	3.56497e-05	1.09942	0.829262	0.754275
Ld1S_190178900	hypothetical protein	19	413.513	398.089	0.962702	-0.016508	562	1128	0.498227	-0.302573	1.81233e-27	5.30951e-25	2.72785	1.41174	0.51753
Ld1S_190179000	hypothetical protein	19	625.312	663.119	1.06046	0.0254949	250	177	1.41243	0.149967	0.000273053	0.00114225	0.283059	0.377006	1.3319
Ld1S_190179300	TATA-box-binding protein	19	893.04	870.344	0.974585	-0.0111804	428	350	1.22286	0.0873757	0.00331047	0.00989314	0.39192	0.49176	1.25475
Ld1S_190179400	Tetratricopeptide repeat, putative	19	676.657	669.663	0.989664	-0.00451234	1435	1854	0.774002	-0.111258	3.03476e-05	0.000163434	2.73994	2.14287	0.782086
Ld1S_190179600	cysteine peptidase A (CBA)	19	843.529	802.723	0.951625	-0.0215344	3747	5612	0.667676	-0.175434	9.38029e-11	1.732e-09	6.653	4.66786	0.701617
Ld1S_190179700	Protein of unknown function (DUF3586), putative	19	293.401	274.845	0.936755	-0.0283738	1249	1932	0.64648	-0.189445	4.77881e-09	6.20398e-08	6.58484	4.54437	0.690127
Ld1S_190179800	pre-RNA processing PIH1/Nop17, putative	19	1036.99	1003.4	0.967611	-0.0142991	429	596	0.719799	-0.142789	1.1393e-05	6.78866e-05	0.57474	0.427545	0.743892
Ld1S_190179900	mitogen-activated protein kinase 4	19	1054.41	1220.44	1.15747	0.0635079	889	1419	0.626498	-0.203081	3.98459e-10	6.42579e-09	1.34577	0.728423	0.541267
Ld1S_190180000	oxidoreductase-like protein	19	1576.12	1535.64	0.974322	-0.0112976	11172	14070	0.79403	-0.100163	1.49041e-06	1.08258e-05	8.92701	7.27512	0.814956
Ld1S_190180300	Eukaryotic translation initiation factor 4E-2	19	783.932	804.904	1.02675	0.0114659	1003	1368	0.733187	-0.134785	7.13773e-07	5.61625e-06	1.74505	1.24611	0.714083
Ld1S_190180400	hypothetical protein	19	393.341	431.9	1.09803	0.0406135	571	360	1.58611	0.200334	1.17807e-10	2.11308e-09	0.915236	1.32207	1.44451
Ld1S_190180500	Triose-phosphate Transporter family, putative	19	869.202	972.865	1.11926	0.0489322	953	1227	0.776691	-0.109752	6.96414e-05	0.000339666	1.41164	0.979581	0.693931
Ld1S_190180600	hypothetical protein	19	2021.72	2157.32	1.06707	0.0281933	1160	949	1.22234	0.0871918	0.000506806	0.00195108	0.469403	0.537705	1.14551
Ld1S_190180900	WD domain, G-beta repeat, putative	19	1146.1	1100.47	0.960189	-0.0176432	1002	1168	0.857877	-0.0665751	0.00114804	0.00396064	1.01911	0.910518	0.893446
Ld1S_190181600	potassium voltage-gated channel, putative	19	895.791	923.786	1.03125	0.0133645	485	380	1.27632	0.105958	0.00217743	0.00689885	0.424206	0.525014	1.23764
Ld1S_200189900	DNA-directed RNA polymerase II subunit 2, putative	20	3238.42	3761.67	1.16158	0.0650481	1334	936	1.42521	0.15388	1.26947e-10	2.25402e-09	0.28903	0.354629	1.22696
Ld1S_200190200	phosphate-Repressible Phosphate Permease-like protein;phosphate-repressible phosphate permease	20	1632.05	1845.39	1.13072	0.053356	362	231	1.5671	0.195097	6.92222e-08	6.99303e-07	0.14154	0.196164	1.38593
Ld1S_200190700_pseudogene	hypothetical protein	20	1898.86	2301.28	1.21193	0.083478	1224	943	1.29799	0.11327	4.92384e-06	3.18437e-05	0.496615	0.531877	1.07101
Ld1S_200190800	Ion channel/Calcium-activated BK potassium channel alpha subunit, putative	20	3138.48	3685.33	1.17424	0.0697569	791	650	1.21692	0.0852631	0.00117003	0.00402727	0.207107	0.214635	1.03635
Ld1S_200191000	phosphoglycerate kinase C, glycosomal	20	1419.33	1630.53	1.1488	0.0602459	343	492	0.697154	-0.156671	4.53581e-07	3.78228e-06	0.346643	0.210361	0.606852
Ld1S_200191500	wd40 repeat domain-containing protein	20	2726.8	2991.67	1.09714	0.0402605	723	587	1.23169	0.0905002	0.00326571	0.00978266	0.215271	0.241671	1.12264
Ld1S_200191700	hypothetical protein	20	2640.61	3025.48	1.14575	0.0590896	1065	887	1.20068	0.079426	0.00220633	0.00698288	0.335907	0.35201	1.04794
Ld1S_200192900	E3 ubiquitin-protein ligase KCMF1, putative	20	2443.48	2777.9	1.13686	0.0557074	740	587	1.26065	0.100594	0.000322322	0.00132564	0.240231	0.266388	1.10888
Ld1S_200193200	Nucleolar protein 49, putative	20	1980.46	2134.41	1.07774	0.0325127	748	548	1.36496	0.135121	4.86863e-06	3.15099e-05	0.276703	0.350447	1.26651
Ld1S_200193600	major facilitator superfamily, putative	20	2260.11	2455.07	1.08626	0.0359342	1110	1312	0.846037	-0.0726109	0.000970272	0.00342204	0.580503	0.452126	0.778852
Ld1S_200193700	hypothetical protein	20	965.474	1091.75	1.13079	0.0533814	180	117	1.53846	0.187087	3.59917e-05	0.000189647	0.121184	0.164873	1.36052
Ld1S_200193800	Protein of unknown function (DUF2946), putative	20	1031.49	1049.21	1.01718	0.0073982	336	469	0.716418	-0.144834	8.89113e-06	5.42291e-05	0.454682	0.320241	0.704317
Ld1S_200194100	NUDIX domain containing protein, putative	20	1512.85	1520.37	1.00497	0.00215448	528	416	1.26923	0.103541	0.000156001	0.000691074	0.274978	0.347283	1.26295
Ld1S_200194400	conserved protein, unknown function	20	4182.8	4581.85	1.0954	0.039573	1259	1009	1.24777	0.0961346	1.53719e-05	8.83608e-05	0.241226	0.27478	1.1391
Ld1S_200195100	kinetoplast ribosomal PPR-repeat containing protein 3, putative	20	1823.67	1981.72	1.08667	0.0360958	600	444	1.35135	0.130768	1.62848e-05	9.31209e-05	0.243465	0.302767	1.24358
Ld1S_200195200	RNA polymerase subunit, putative	20	385.089	438.444	1.13855	0.0563524	1112	1413	0.786978	-0.104037	0.000126275	0.000570607	3.66928	2.53624	0.69121
Ld1S_200195700	RWD domain-containing protein	20	817.856	819.083	1.0015	0.00065073	530	423	1.25296	0.0979355	0.00111924	0.00387438	0.517206	0.647065	1.25108
Ld1S_200195800	chaperone protein DNAJ-like protein	20	1681.56	1835.57	1.09159	0.0380604	802	633	1.26698	0.102771	7.91833e-05	0.000379881	0.376437	0.436921	1.16067
Ld1S_200196600	kinesin heavy chain, putative	20	3159.57	3199.98	1.01279	0.00552048	1516	1186	1.27825	0.106615	1.05362e-06	7.96236e-06	0.375368	0.473752	1.2621
Ld1S_200196700	rRNA biogenesis protein-like protein	20	2338.96	2402.72	1.02726	0.0116797	996	725	1.37379	0.137921	1.58705e-06	1.14803e-05	0.309967	0.414531	1.33734
Ld1S_200196800	serine/threonine protein phosphatase 2A regulatory subunit, putative	20	1775.08	1933.73	1.08938	0.037179	1712	1460	1.1726	0.0691509	0.000950879	0.0033658	0.822499	0.885334	1.0764
Ld1S_200197500	Tubulin/FtsZ family, putative	20	2245.44	2251.11	1.00253	0.00109656	2197	1743	1.26047	0.100533	0.000514407	0.00197429	0.776241	0.975961	1.25729
Ld1S_200197600	tubulin-tyrosine ligase, putative	20	2176.67	2404.9	1.10485	0.0433035	1021	810	1.26049	0.100541	0.000405079	0.00161024	0.372128	0.42455	1.14087
Ld1S_200198400	ATP-dependent RNA helicase, putative	20	2459.99	2601.21	1.05741	0.0242434	1020	740	1.37838	0.139368	8.32735e-09	1.02219e-07	0.300815	0.392124	1.30354
Ld1S_200198700	RNA-editing nuclease 1	20	2674.54	3048.38	1.13978	0.056821	1281	1042	1.22937	0.0896814	0.000571039	0.00216051	0.3896	0.420223	1.0786
Ld1S_200199000	transmembrane protein, conserved	20	6349.39	6928.94	1.09128	0.0379347	2442	1741	1.40264	0.146947	4.14968e-14	1.48258e-12	0.2742	0.352435	1.28532
Ld1S_200199100	cyclophilin 15, putative	20	1532.11	1533.46	1.00089	0.000384518	793	620	1.27903	0.106881	0.000833363	0.00300428	0.404672	0.51713	1.2779
Ld1S_200199200	conserved protein, unknown function	20	2173.92	2358	1.08468	0.0352998	1253	915	1.3694	0.13653	2.60959e-07	2.30973e-06	0.420898	0.531383	1.2625
Ld1S_200199300	protein kinase, putative	20	11299.6	11627.5	1.02902	0.0124219	1410	1913	0.737062	-0.132496	4.8424e-06	3.13632e-05	0.169298	0.121264	0.716279
Ld1S_200199600_pseudogene	Golgi SNARE protein-like. Intracellular trafficking, secretion, and vesicular transport	20	1671.47	1736.32	1.0388	0.016532	842	683	1.2328	0.0908914	0.000899619	0.00321282	0.408622	0.484932	1.18675
Ld1S_200199800	glutaredoxin, putative	20	367.669	454.804	1.23699	0.0923673	376	280	1.34286	0.12803	0.000505786	0.00194801	0.761555	0.826731	1.08558
Ld1S_200199900	hypothetical protein	20	3082.55	3232.7	1.04871	0.0206561	673	459	1.46623	0.166202	3.86068e-08	4.16337e-07	0.148903	0.208185	1.39813
Ld1S_200200100	hypothetical protein	20	2570.93	2847.7	1.10765	0.0444045	88	149	0.590604	-0.228704	5.37804e-05	0.000270255	0.0579557	0.0309021	0.533202
Ld1S_200200600	WD40 repeat-containing protein	20	7643.11	8260.63	1.08079	0.0337432	1529	1066	1.43433	0.15665	1.18333e-10	2.11389e-09	0.139472	0.185095	1.32711
Ld1S_200200700	ATPase family, AAA domain containing 5. Function unknown	20	5992.72	6356.34	1.06068	0.0255831	2089	1688	1.23756	0.092566	0.00031972	0.00131668	0.281675	0.328648	1.16676
Ld1S_200201500	calpain-like cysteine peptidase, putative (fragment)	20	3018.37	3168.36	1.04969	0.021062	2658	4164	0.638329	-0.194956	1.20254e-08	1.43179e-07	1.37955	0.838921	0.60811
Ld1S_200201600	calpain-like cysteine peptidase, putative (fragment)	20	2545.26	2708.1	1.06398	0.0269329	145	226	0.641593	-0.19274	0.00142233	0.00475638	0.0887926	0.0535431	0.603013
Ld1S_200201800	calpain-like cysteine peptidase, putative	20	2265.61	2342.73	1.03404	0.0145372	502	778	0.645244	-0.190276	1.18803e-10	2.11798e-09	0.343396	0.21428	0.624003
Ld1S_200202100	Domain of unknown function (DUF1935), putative	20	422.681	437.353	1.03471	0.0148191	366	483	0.757764	-0.120466	0.00161216	0.00530036	1.1427	0.836852	0.732344
Ld1S_200202900	calpain-like cysteine peptidase, putative	20	470.359	488.614	1.03881	0.0165363	587	791	0.742099	-0.129538	6.9374e-06	4.3397e-05	1.68169	1.20136	0.714373
Ld1S_200203400	coatomer beta subunit, putative	20	3044.04	3134.55	1.02973	0.0127243	3114	2142	1.45378	0.162499	6.09232e-12	1.44327e-10	0.70367	0.993445	1.41181
Ld1S_200203600	pumilio protein, putative (fragment)	20	1906.19	1973	1.03505	0.0149597	512	351	1.45869	0.163963	2.43088e-05	0.000133549	0.184137	0.259504	1.4093
Ld1S_200203800	hypothetical protein	20	3770.21	4115.05	1.09146	0.0380093	1461	1154	1.26603	0.102444	2.34245e-05	0.000129374	0.306084	0.355039	1.15994
Ld1S_200204100	hypothetical protein	20	2952.35	3324.32	1.12599	0.0515347	822	587	1.40034	0.146234	8.17368e-08	8.08082e-07	0.198825	0.247269	1.24365
Ld1S_200204500	hypothetical protein	20	1347.81	1516.01	1.12479	0.0510731	385	230	1.67391	0.223733	2.85634e-07	2.49546e-06	0.170647	0.253956	1.48819
Ld1S_200204600	hypothetical protein	20	885.705	870.344	0.982656	-0.00759859	599	408	1.46814	0.166767	1.07295e-07	1.03174e-06	0.46065	0.688234	1.49405
Ld1S_200204700	hypothetical protein	20	1819.09	2071.16	1.13857	0.0563589	728	568	1.28169	0.107783	0.000575766	0.00217465	0.312244	0.351495	1.1257
Ld1S_200204900	Myotubularin-related protein, putative	20	3128.39	3479.19	1.11213	0.0461573	928	632	1.46835	0.166831	4.10966e-11	8.45896e-10	0.202021	0.266729	1.3203
Ld1S_200205000	hypothetical protein	20	3175.15	3271.97	1.03049	0.0130444	937	663	1.41327	0.150226	1.97294e-09	2.78334e-08	0.208809	0.286372	1.37146
Ld1S_200205100	hypothetical protein	20	3213.66	3427.93	1.06667	0.028032	1375	1009	1.36274	0.134412	9.78579e-07	7.44008e-06	0.313972	0.401116	1.27755
Ld1S_200205200	hypothetical protein	20	6725.31	7038	1.0465	0.0197372	2085	1670	1.2485	0.0963896	4.28842e-06	2.8023e-05	0.248316	0.296249	1.19303
Ld1S_200205300	Domain of unknown function (DUF4455)/Domain of unknown function (DUF4456), putative	20	5042.84	5688.86	1.12811	0.0523505	1711	1421	1.20408	0.0806559	0.00100973	0.00354466	0.281786	0.300763	1.06735
Ld1S_200205400	cell division cycle protein-like protein	20	2843.24	3124.73	1.099	0.0409985	705	481	1.4657	0.166044	7.80152e-08	7.79177e-07	0.169173	0.22562	1.33366
Ld1S_200205900	hypothetical protein	20	1311.14	1465.84	1.11799	0.0484389	744	611	1.21768	0.0855317	0.00149734	0.00497734	0.466008	0.507558	1.08916
Ld1S_200206000	ribosome biogenesis protein, putative	20	1115.84	1131.01	1.01359	0.00586383	828	648	1.27778	0.106455	9.9525e-05	0.000465261	0.580727	0.732089	1.26064
Ld1S_200206100	Peptidase C50 separase, putative	20	3934.33	4396.43	1.11745	0.0482299	1727	1320	1.30833	0.116718	2.73133e-07	2.40779e-06	0.335508	0.392818	1.17082
Ld1S_200206500	hypothetical protein	20	801.353	896.519	1.11876	0.048736	498	337	1.47774	0.169599	3.3518e-07	2.88813e-06	0.420539	0.555482	1.32088
Ld1S_200207200	Pentatricopeptide repeat domain containing protein, putative	20	2984.44	3423.57	1.14714	0.059616	2113	1490	1.41812	0.151713	4.05395e-12	9.7885e-11	0.499256	0.617192	1.23622
Ld1S_200207500	hypothetical protein	20	701.413	767.822	1.09468	0.0392869	692	905	0.764641	-0.116542	9.70375e-05	0.000455346	1.29025	0.901251	0.698507
Ld1S_200207600	CHORD, putative	20	904.96	1028.49	1.1365	0.0555702	1039	1281	0.811085	-0.0909336	0.00259866	0.00803645	1.41553	1.01022	0.713668
Ld1S_210208300	proteasome subunit alpha type-5, putative	21	781.181	746.009	0.954975	-0.0200078	1369	1609	0.850839	-0.0701526	0.00240904	0.00752686	2.0597	1.8351	0.890954
Ld1S_210208500	GPI transamidase component GAA1, putative	21	1298.3	1325.15	1.02068	0.00888867	561	734	0.764305	-0.116733	3.0795e-05	0.000165337	0.565354	0.423349	0.748821
Ld1S_210208600	vacuolar ATP synthase, putative	21	626.229	598.77	0.956153	-0.0194727	372	505	0.736634	-0.132748	5.2924e-05	0.000266256	0.806415	0.621273	0.770414
Ld1S_210208700	vacuolar ATP synthase, putative	21	589.553	650.031	1.10258	0.0424109	612	855	0.715789	-0.145215	1.0905e-06	8.19882e-06	1.45025	0.941494	0.649194
Ld1S_210209100	SET domain containing protein, putative	21	992.063	1061.21	1.0697	0.0292612	1237	1581	0.782416	-0.106562	6.6381e-05	0.000325389	1.59365	1.16565	0.731436
Ld1S_210209200	RNA polymerase II, putative	21	1059.91	1104.83	1.04238	0.0180273	630	896	0.703125	-0.152967	1.06998e-08	1.29355e-07	0.845353	0.570221	0.674536
Ld1S_210209300	hypothetical protein	21	353.915	349.01	0.986139	-0.00606168	116	210	0.552381	-0.257761	2.25588e-09	3.14714e-08	0.593362	0.332369	0.560145
Ld1S_210209400	60S ribosomal protein L32	21	450.188	467.891	1.03933	0.0167514	9142	15849	0.576819	-0.238961	0.000345045	0.00140345	35.2053	19.5387	0.554994
Ld1S_210209600	proteasome alpha 2 subunit, putative	21	621.644	700.201	1.12637	0.051681	1635	2303	0.709944	-0.148776	1.1673e-05	6.93201e-05	3.70469	2.33504	0.630294
Ld1S_210209700	Protein of unknown function, DUF607, putative	21	749.09	732.921	0.978414	-0.00947714	1091	1580	0.690506	-0.160832	4.53056e-09	5.92547e-08	2.10922	1.48856	0.70574
Ld1S_210209900	hypothetical protein	21	405.261	479.889	1.18415	0.0734061	216	306	0.705882	-0.151268	4.38059e-05	0.000225284	0.75507	0.450104	0.59611
Ld1S_210210700	hypothetical protein	21	555.629	490.795	0.883315	-0.0538845	330	415	0.795181	-0.0995342	0.0019932	0.00638651	0.746901	0.672378	0.900223
Ld1S_210210800	hypothetical protein	21	626.229	688.204	1.09897	0.0409843	673	811	0.82984	-0.0810058	0.00296467	0.00899431	1.29505	0.977908	0.755109
Ld1S_210211100	function. Function unknown	21	1671.47	1610.9	0.963761	-0.0160305	1219	1989	0.612871	-0.212631	3.40373e-16	1.79134e-14	1.18997	0.75672	0.635916
Ld1S_210211400	hypothetical protein	21	425.432	406.815	0.956239	-0.0194335	516	637	0.810047	-0.0914897	0.000412039	0.001632	1.4973	1.26839	0.847118
Ld1S_210211600	serine/threonine-protein kinase, putative	21	2008.88	2016.62	1.00385	0.00167018	1538	1841	0.835416	-0.0780975	0.00186334	0.00602534	0.91643	0.762661	0.832209
Ld1S_210214700_pseudogene	PB1 domain containing protein, putative	21	4668.75	4666.92	0.999608	-0.000170461	1749	1439	1.21543	0.084729	0.000489998	0.00189701	0.30822	0.374766	1.2159
Ld1S_210215800	adenylate kinase, putative	21	794.017	796.179	1.00272	0.00118062	921	1316	0.699848	-0.154996	1.12522e-08	1.35104e-07	1.65739	1.15678	0.697948
Ld1S_210216200	thymidine kinase, putative	21	837.111	724.196	0.865113	-0.0629271	654	887	0.737317	-0.132346	0.00072443	0.00265957	1.0596	0.903071	0.852278
Ld1S_210216500	Ribosomal protein L1p/L10e family, putative	21	769.262	850.712	1.10588	0.0437083	544	423	1.28605	0.109259	0.000491523	0.00189973	0.549878	0.639465	1.16292
Ld1S_210217100	U4/U6 small nuclear ribonuclear protein, putative	21	1766.83	1609.81	0.91113	-0.0404197	466	359	1.29805	0.113291	0.00117029	0.00402727	0.203189	0.289475	1.42466
Ld1S_210217400	tRNA-Lys	21	84.3529	74.1646	0.879218	-0.0559033	12	35	0.342857	-0.464887	0.000409746	0.00162438	0.414924	0.161802	0.389957
Ld1S_210217500	tRNA-Val	21	66.0153	78.5272	1.18953	0.0753756	22	48	0.458333	-0.338819	0.000964747	0.00340529	0.727104	0.280158	0.385306
Ld1S_210217600	tRNA-Pro	21	76.101	65.4394	0.859902	-0.0655512	19	47	0.404255	-0.393344	5.56426e-05	0.000278181	0.6176	0.290345	0.470118
Ld1S_210217700	5S(MS) ribosomal RNA	21	153.119	186.502	1.21802	0.0856553	12	43	0.27907	-0.554287	4.25811e-07	3.58472e-06	0.280828	0.0643424	0.229117
Ld1S_210217900	cell division protein kinase 2	21	797.685	749.281	0.939319	-0.0271869	1010	1254	0.805423	-0.0939762	0.00092814	0.00329726	1.57205	1.34796	0.857454
Ld1S_210218000	40S ribosomal protein S23, putative	21	529.039	444.988	0.841124	-0.07514	982	1349	0.727947	-0.1379	0.000491391	0.00189973	2.5499	2.2068	0.865445
Ld1S_210218100	40S ribosomal protein S23, putative	21	533.624	509.336	0.954486	-0.0202305	1569	2195	0.714806	-0.145812	6.91508e-05	0.000337461	4.11339	3.08048	0.748891
Ld1S_210218200	60S ribosomal protein L9, putative	21	610.642	540.965	0.885897	-0.0526169	1590	2060	0.771845	-0.11247	7.464e-05	0.000360842	3.3735	2.93919	0.871258
Ld1S_210218500	dynein arm light chain, putative	21	849.947	849.621	0.999616	-0.000166629	715	925	0.772973	-0.111836	6.09575e-05	0.000301495	1.0883	0.841552	0.77327
Ld1S_210219300_pseudogene	hypothetical protein	21	1079.17	969.593	0.898465	-0.0464991	1581	1860	0.85	-0.0705811	0.00177217	0.0057602	1.72355	1.63058	0.946058
Ld1S_210219400	histone H2A, putative	21	485.946	467.891	0.962847	-0.0164429	71	112	0.633929	-0.19796	0.000189562	0.000824374	0.230478	0.151745	0.65839
Ld1S_210219600	histone H2A	21	535.458	499.52	0.932885	-0.0301717	2557	3643	0.701894	-0.153728	0.000135954	0.000609643	6.80353	5.11891	0.75239
Ld1S_210220300	Domain of unknown function (DUF4499), putative	21	717	698.02	0.973529	-0.0116511	637	916	0.695415	-0.157756	5.72781e-08	5.92255e-07	1.27755	0.912581	0.714324
Ld1S_210220400	hypothetical protein	21	418.097	404.633	0.967798	-0.0142153	403	556	0.72482	-0.13977	0.00022549	0.00096881	1.32984	0.995963	0.748937
Ld1S_210220600	Domain of unknown function (DUF4042)/HEAT-like repeat, putative	21	3496.06	3353.77	0.959299	-0.018046	1069	850	1.25765	0.0995588	6.28429e-05	0.000309947	0.243131	0.318746	1.31101
Ld1S_210220800	hypothetical protein	21	1338.64	1236.8	0.923923	-0.0343642	144	206	0.699029	-0.155505	0.000135543	0.000608109	0.153887	0.116429	0.756588
Ld1S_210221400	hypoxanthine-guanine phosphoribosyltransferase	21	660.153	567.141	0.859105	-0.0659535	1647	2448	0.672794	-0.172118	6.48062e-14	2.22493e-12	3.70823	2.90404	0.783133
Ld1S_210221500	hypothetical protein	21	1058.08	1035.03	0.978219	-0.00956395	567	749	0.757009	-0.120899	8.93113e-07	6.90735e-06	0.707887	0.547809	0.773865
Ld1S_210221700	hypothetical protein	21	906.794	882.341	0.973034	-0.0118721	644	831	0.77497	-0.110715	2.57348e-05	0.000140749	0.916416	0.729877	0.796447
Ld1S_210222100	Protein kinase domain containing protein, putative	21	2578.26	2605.58	1.01059	0.00457648	1019	771	1.32166	0.12112	1.74248e-06	1.25018e-05	0.299038	0.391084	1.30781
Ld1S_210222500	CCR4-NOT transcription complex subunit 1	21	6011.06	5720.49	0.951661	-0.0215178	2914	2443	1.1928	0.0765661	0.000799034	0.00289716	0.406417	0.509397	1.25338
Ld1S_210222900	proteasome regulatory non-ATP-ase subunit 5, putative	21	1288.22	1276.07	0.99057	-0.00411482	1734	2120	0.817925	-0.0872868	0.000248409	0.00105676	1.64569	1.35886	0.825711
Ld1S_210223000	Nucleolar protein 91, putative	21	1983.21	1859.57	0.937656	-0.0279565	1400	1050	1.33333	0.124939	8.17329e-08	8.08082e-07	0.529445	0.752863	1.42199
Ld1S_210223200_pseudogene	Domain of unknown function (DUF543), putative	21	508.868	506.064	0.994491	-0.00239936	633	849	0.745583	-0.127504	0.000112916	0.000517964	1.66841	1.25083	0.749714
Ld1S_210223300	60S ribosomal protein L36, putative	21	380.505	333.741	0.8771	-0.056951	6820	9510	0.71714	-0.144396	6.73074e-05	0.000329013	24.9931	20.435	0.817626
Ld1S_210223400	leu phe-trna protein transferase. Function unknown	21	960.89	1024.13	1.06581	0.02768	714	1172	0.609215	-0.215229	4.49896e-15	1.97707e-13	1.2197	0.69718	0.571598
Ld1S_210223500	hypothetical protein	21	1092.92	978.318	0.895142	-0.0481082	1582	2009	0.787456	-0.103773	8.95414e-07	6.90939e-06	1.83819	1.61706	0.8797
Ld1S_210223800	hypothetical protein	21	478.611	486.433	1.01634	0.00704	268	434	0.617512	-0.209355	2.20354e-09	3.09821e-08	0.906791	0.55095	0.607582
Ld1S_210223900	histone deacetylase, putative	21	1169.02	1067.75	0.913373	-0.0393518	484	659	0.734446	-0.13404	9.08425e-07	6.98526e-06	0.563719	0.453289	0.804103
Ld1S_210224000	metallo-beta-lactamase family-like protein	21	964.557	880.159	0.912501	-0.0397666	426	566	0.75265	-0.123407	4.77633e-06	3.09809e-05	0.586798	0.484003	0.824821
Ld1S_210224300	phosphoglucomutase, putative	21	1706.31	1597.81	0.936412	-0.0285331	1179	1623	0.726433	-0.138805	8.36557e-10	1.25684e-08	0.951174	0.737884	0.775762
Ld1S_210224600	RNA helicase, putative	21	1913.53	1885.74	0.985481	-0.00635181	821	638	1.28683	0.109522	0.000233396	0.000998012	0.333416	0.435372	1.30579
Ld1S_210224900	hypothetical protein	21	1389.07	1295.7	0.93278	-0.0302205	392	520	0.753846	-0.122717	2.76554e-05	0.000150039	0.374351	0.302539	0.808171
Ld1S_210225000	hypothetical protein	21	1312.97	1281.52	0.976046	-0.0105295	398	541	0.735675	-0.133314	0.000281613	0.0011747	0.412043	0.310568	0.753729
Ld1S_210225300	Lupus La protein homolog, putative	21	989.313	975.047	0.98558	-0.00630828	2425	1899	1.27699	0.106187	7.36618e-06	4.5786e-05	1.91951	2.48706	1.29567
Ld1S_210225400	Tetratricopeptide repeat, putative	21	3291.6	3104.01	0.94301	-0.0254839	952	720	1.32222	0.121304	0.00234428	0.00737169	0.218739	0.3067	1.40213
Ld1S_210225600	5S(MS) ribosomal RNA	21	125.612	112.338	0.894319	-0.0485077	3	27	0.111111	-0.954243	4.34397e-07	3.63957e-06	0.214947	0.0267052	0.124241
Ld1S_210225800	hypothetical protein	21	1582.53	1528.01	0.965546	-0.015227	636	378	1.68254	0.225965	5.75363e-11	1.13129e-09	0.238857	0.416228	1.74258
Ld1S_210225900	hypothetical protein	21	683.075	654.394	0.958011	-0.0186294	555	748	0.741979	-0.129609	4.94093e-05	0.000250293	1.09505	0.848113	0.774499
Ld1S_210226400	hypothetical protein	21	926.965	723.105	0.780078	-0.107862	394	541	0.728281	-0.137701	2.68491e-05	0.000146297	0.583625	0.544872	0.9336
Ld1S_210226800	PIWI-like protein	21	3402.54	3383.22	0.994321	-0.00247351	742	587	1.26405	0.101766	0.000102367	0.00047654	0.172518	0.219318	1.27127
Ld1S_210226900	Peptidase C19, ubiquitin carboxyl-terminal hydrolase, putative	21	1963.96	1797.4	0.915194	-0.0384866	630	804	0.783582	-0.105915	0.00229696	0.00723583	0.409378	0.350506	0.856192
Ld1S_210227000	hypothetical protein	21	1059	997.95	0.942355	-0.0257852	1030	1288	0.799689	-0.0970786	2.33508e-05	0.000129157	1.21625	1.03212	0.848607
Ld1S_210227100	Protein of unknown function (DUF667), putative	21	664.738	635.852	0.956547	-0.0192938	798	1046	0.762906	-0.117529	2.37323e-06	1.6411e-05	1.57355	1.25501	0.797563
Ld1S_210227500	mitochondrial processing peptidase alpha subunit, putative	21	1460.59	1270.61	0.869933	-0.0605142	3791	3101	1.22251	0.087252	0.000192478	0.000835816	2.12312	2.9836	1.40529
Ld1S_210228000	hypothetical protein	21	3047.71	3122.55	1.02456	0.010536	1324	1090	1.21468	0.0844615	5.49176e-05	0.000275183	0.357646	0.424013	1.18557
Ld1S_210228200	protein kinase, putative	21	2923.93	2920.78	0.998922	-0.000468299	810	665	1.21805	0.0856634	0.00305518	0.00924974	0.227434	0.277323	1.21936
Ld1S_210229600	serine/threonine protein kinase, putative	21	4368.01	4496.77	1.02948	0.0126172	1928	2566	0.751364	-0.12415	7.20038e-06	4.48506e-05	0.587452	0.428752	0.729849
Ld1S_210230000	hypothetical protein	21	530.873	527.878	0.994357	-0.00245755	650	927	0.701187	-0.154166	3.54759e-08	3.84461e-07	1.74618	1.23135	0.705166
Ld1S_210230600	syntaxin, putative	21	766.511	716.561	0.934835	-0.0292653	1175	1550	0.758065	-0.120294	0.000182219	0.0007948	2.02215	1.63978	0.810908
Ld1S_210230700	BAR domain containing protein, putative	21	791.267	786.363	0.993803	-0.00269988	795	1034	0.768859	-0.114153	8.91571e-06	5.43413e-05	1.30677	1.01098	0.773653
Ld1S_210230800	hypothetical protein	21	848.113	792.907	0.934907	-0.0292317	1473	1931	0.762817	-0.11758	1.83331e-06	1.30575e-05	2.27682	1.85772	0.815929
Ld1S_210231000	ring-box protein 1, putative	21	397.009	395.908	0.997228	-0.00120562	376	511	0.735812	-0.133233	5.33937e-05	0.000268465	1.28713	0.949715	0.737858
Ld1S_210231100	methyltransferase domain containing protein, putative	21	1018.65	928.148	0.911153	-0.0404089	256	432	0.592593	-0.227244	1.80228e-12	4.63164e-11	0.424089	0.275818	0.650377
Ld1S_210231200	histone H4	21	408.928	465.71	1.13886	0.0564687	47	111	0.423423	-0.373225	3.05703e-06	2.06361e-05	0.271441	0.100921	0.371797
Ld1S_220231400	CLN3 protein, putative	22	1687.97	1758.14	1.04157	0.0176869	615	1036	0.593629	-0.226485	1.16501e-10	2.09391e-09	0.613753	0.349802	0.569939
Ld1S_220231600	hypothetical protein	22	497.865	582.41	1.16981	0.0681171	474	676	0.701183	-0.154168	3.40301e-07	2.92081e-06	1.3578	0.813859	0.599397
Ld1S_220231800	SET domain containing protein, putative	22	862.783	822.355	0.953141	-0.0208426	533	691	0.771346	-0.112751	0.00254357	0.0078883	0.800896	0.648139	0.809267
Ld1S_220232600	RNA recognition motif. (a.k.a. RRM, RBD, or RNP domain), putative	22	287.9	299.93	1.04179	0.0177787	300	422	0.7109	-0.148191	7.80415e-05	0.000375428	1.46579	1.00023	0.682386
Ld1S_220233400	Nucleolar protein 168, putative	22	3983.84	3877.28	0.973252	-0.0117745	1706	966	1.76605	0.247002	5.20369e-17	3.15317e-15	0.24248	0.439999	1.81458
Ld1S_220233800	phosphoinositide phosphatase	22	767.428	720.924	0.939402	-0.0271484	408	873	0.467354	-0.330354	1.08714e-25	2.38871e-23	1.13757	0.565941	0.497501
Ld1S_220234800	methylenetetrahydrofolate dehydrogenase-like protein	22	1290.97	1280.43	0.991839	-0.00355891	798	1002	0.796407	-0.0988648	0.000930716	0.00330374	0.776163	0.623228	0.80296
Ld1S_220234900	hypothetical protein	22	746.34	741.646	0.993711	-0.00273984	707	913	0.77437	-0.111051	1.20319e-06	8.92538e-06	1.2233	0.953285	0.779271
Ld1S_220235200	Nucleoporin NUP132	22	3229.25	3082.19	0.954462	-0.0202415	2140	1826	1.17196	0.068913	0.000323107	0.00132824	0.565457	0.694311	1.22788
Ld1S_220235300	DNA primase small subunit, putative	22	1199.28	1141.92	0.95217	-0.0212854	896	1151	0.778454	-0.108767	1.90492e-05	0.000107392	0.959744	0.784646	0.817557
Ld1S_220235600	hypothetical protein	22	10579.9	10296.9	0.973252	-0.0117745	95	150	0.633333	-0.198368	0.000701095	0.00257929	0.0141779	0.00922609	0.650739
Ld1S_220236400	40S ribosomal protein S15, putative	22	549.211	508.246	0.925411	-0.0336653	2800	3576	0.782998	-0.106239	7.62914e-05	0.00036842	6.51116	5.50915	0.846108
Ld1S_220236700	40S ribosomal protein S15, putative	22	539.125	561.688	1.04185	0.0178056	3047	4261	0.71509	-0.145639	0.000375352	0.001505	7.90355	5.42472	0.686365
Ld1S_220237600	kinesin, putative	22	2385.72	2307.83	0.967351	-0.014416	1799	2116	0.850189	-0.0704845	0.000370663	0.00149028	0.886944	0.779521	0.878884
Ld1S_220238400	hypothetical protein	22	4699.92	4380.07	0.931946	-0.0306093	1109	905	1.22541	0.088283	0.00261609	0.00808184	0.192556	0.253192	1.3149
Ld1S_220240000	Major Facilitator superfamily. Carbohydrate transport and metabolism	22	1257.96	1171.36	0.931163	-0.0309742	4134	5161	0.801008	-0.0963634	0.00027269	0.00114182	4.10268	3.52922	0.860222
Ld1S_220240400	NADH-cytochrome b5 reductase, putative	22	771.096	789.635	1.02404	0.0103182	1611	2023	0.796342	-0.0989003	0.00193302	0.00620955	2.62354	2.04018	0.777645
Ld1S_220240500	NADH-cytochrome b5 reductase, putative	22	736.254	837.624	1.13768	0.0560213	1856	2338	0.793841	-0.100267	0.000267643	0.00112722	3.17553	2.21579	0.69777
Ld1S_220240600	translation initiation factor SUI1, putative	22	1561.45	1665.43	1.0666	0.028	2338	2834	0.824982	-0.0835553	0.00088166	0.00315895	1.81498	1.40384	0.773472
Ld1S_220241100_pseudogene	5'a2rel-related protein	22	4433.11	4409.52	0.994679	-0.00231709	136	91	1.49451	0.174498	0.000956593	0.00338194	0.0205273	0.0308423	1.5025
Ld1S_220241400_pseudogene	Protein of unknown function (DUF3184), putative	22	3666.6	3594.8	0.980418	-0.00858855	495	341	1.45161	0.161851	5.774e-05	0.00028671	0.0930017	0.137699	1.48061
Ld1S_220242600	F-box and WD40 domain containing protein	22	2079.48	1959.91	0.942499	-0.0257193	1542	1246	1.23756	0.0925663	7.79769e-05	0.000375323	0.599188	0.786771	1.31306
Ld1S_220242700	hypothetical protein	22	3384.2	3312.32	0.97876	-0.00932361	1513	1132	1.33657	0.125993	1.47205e-08	1.72274e-07	0.334495	0.456779	1.36558
Ld1S_220243100	Galactose oxidase, central domain/Kelch motif containing protein, putative	22	3360.36	3294.87	0.980511	-0.00854761	824	1148	0.71777	-0.144015	2.32055e-09	3.222e-08	0.34163	0.250086	0.732037
Ld1S_220243200_pseudogene	hypothetical protein	22	2158.33	2197.67	1.01823	0.00784424	863	673	1.28232	0.107996	0.0011051	0.00383691	0.311815	0.392688	1.25936
Ld1S_220243700	CRAL/TRIO domain containing protein, putative	22	2003.38	1829.03	0.912972	-0.0395427	576	412	1.39806	0.145525	1.21263e-07	1.14971e-06	0.205652	0.314921	1.53133
Ld1S_220243800	Zinc finger, C3HC4 type (RING finger), putative	22	6940.78	6937.66	0.999551	-0.000194837	929	1203	0.772236	-0.11225	0.000884679	0.00316719	0.173324	0.133907	0.772583
Ld1S_220244600	immunodominant antigen. Function unknown	22	1608.21	1438.58	0.894522	-0.0484091	974	1299	0.749808	-0.12505	8.80433e-05	0.000417826	0.807732	0.677059	0.838222
Ld1S_220244900	WD domain, G-beta repeat, putative	22	4711.84	4325.54	0.918015	-0.0371503	723	495	1.46061	0.164533	6.46894e-09	8.13384e-08	0.105054	0.167147	1.59105
Ld1S_220245200	translation initiation factor IF-2, putative	22	2115.24	2011.17	0.9508	-0.021911	856	614	1.39414	0.144305	2.02179e-07	1.82251e-06	0.290274	0.425623	1.46628
Ld1S_220245300	WD domain, G-beta repeat, putative	22	1376.24	1363.32	0.990615	-0.00409503	403	285	1.41404	0.15046	1.149e-05	6.83723e-05	0.207087	0.295602	1.42743
Ld1S_220245400	hypothetical protein	22	3099.05	2900.05	0.935788	-0.0288227	273	180	1.51667	0.18089	8.41432e-07	6.54455e-06	0.0580823	0.0941362	1.62074
Ld1S_220246100	Kinesin family member. Cytoskeleton	22	6675.8	6285.45	0.941528	-0.0261668	810	1193	0.678961	-0.168155	0.000119941	0.000544223	0.178705	0.128869	0.721126
Ld1S_220246200	Kinesin family member. Cytoskeleton	22	5097.85	4918.86	0.964889	-0.0155226	1296	1636	0.792176	-0.101178	0.000955278	0.00337865	0.32092	0.263476	0.821002
Ld1S_220246400	palmitoyl acyltransferase 11, putative	22	1157.1	1069.93	0.924667	-0.0340147	577	439	1.31435	0.118711	0.000218769	0.000942068	0.379396	0.539286	1.42143
Ld1S_220246500	farnesyl pyrophosphate synthase	22	995.731	1004.49	1.0088	0.00380545	1655	2570	0.643969	-0.191135	9.2581e-14	3.04754e-12	2.58102	1.6476	0.638351
Ld1S_220246900	MORN repeat, putative	22	1357.9	1237.89	0.911625	-0.0401835	991	1201	0.825146	-0.0834694	0.000958782	0.00338801	0.884455	0.800553	0.905137
Ld1S_220247200	fk506-binding protein 1-like protein	22	408.011	369.732	0.906182	-0.0427847	449	607	0.739703	-0.130942	1.098e-05	6.57381e-05	1.4877	1.21439	0.816286
Ld1S_220247300	hypothetical protein	22	1471.59	1221.53	0.830077	-0.0808814	434	648	0.669753	-0.174085	2.92716e-05	0.000158222	0.44034	0.355291	0.806856
Ld1S_220247500	i/6 autoantigen-like protein	22	608.808	618.402	1.01576	0.00679063	3457	5040	0.685913	-0.163731	5.62026e-17	3.3603e-15	8.27847	5.59021	0.675271
Ld1S_220247700	Mitochondrial glycoprotein, putative	22	758.259	753.643	0.993913	-0.00265181	268	411	0.652068	-0.185707	1.17434e-05	6.9691e-05	0.542031	0.355606	0.656062
Ld1S_220248200	40S ribosomal protein L14, putative	22	633.564	699.111	1.10346	0.0427556	1506	2201	0.684234	-0.164795	7.88099e-05	0.000378503	3.474	2.15417	0.620082
Ld1S_220249500	hypothetical protein	22	366.752	356.645	0.972441	-0.0121366	2826	3452	0.818656	-0.0868986	0.000269323	0.00113123	9.41236	7.92386	0.841856
Ld1S_220249900	phosphoinositide-specific phospholipase C, putative	22	1990.54	2003.54	1.00653	0.00282498	1356	2367	0.572877	-0.241939	1.89364e-23	2.972e-21	1.18912	0.676804	0.569163
Ld1S_230250000	hypothetical protein	23	1456.92	2363.45	1.62222	0.210111	1797	1445	1.2436	0.0946802	0.00202599	0.00647272	0.991818	0.760329	0.766601
Ld1S_230250100	hypothetical protein	23	1084.67	1621.81	1.49521	0.174702	1518	1212	1.25248	0.0977692	7.72327e-05	0.000372352	1.11739	0.935994	0.837659
Ld1S_230250300	Beta propeller protein 1	23	1299.22	1793.04	1.38009	0.139908	2233	1503	1.4857	0.17193	6.4303e-13	1.78848e-11	1.15685	1.24537	1.07652
Ld1S_230250400	peroxidoxin	23	696.828	965.231	1.38518	0.141505	12787	10574	1.20929	0.0825294	0.00043532	0.0017134	15.1745	13.2476	0.87302
Ld1S_230250500	cyclophilin, putative	23	850.864	1231.35	1.44718	0.160522	1030	645	1.5969	0.203278	2.72379e-09	3.7126e-08	0.758053	0.83648	1.10346
Ld1S_230250600	hypothetical protein	23	594.138	834.352	1.40431	0.147462	480	335	1.43284	0.156196	5.86858e-06	3.73559e-05	0.563842	0.575297	1.02032
Ld1S_230250700	agmatinase-like protein	23	981.061	1504.01	1.53305	0.185556	1643	1291	1.27266	0.104711	1.16099e-05	6.89922e-05	1.31592	1.09241	0.830147
Ld1S_230250900	Domain of unknown function (DUF1767), putative	23	920.547	1446.21	1.57103	0.196185	668	371	1.80054	0.255403	1.73244e-18	1.29037e-16	0.403021	0.461897	1.14609
Ld1S_230251000	Putative methyltransferase, putative	23	816.023	1116.83	1.36863	0.136286	801	636	1.25943	0.100175	8.82929e-05	0.000418558	0.77939	0.717207	0.920216
Ld1S_230251100	GDP-mannose pyrophosphorylase	23	1023.24	1519.28	1.48478	0.171663	1636	1179	1.38762	0.142269	1.13598e-06	8.48268e-06	1.15223	1.07682	0.934559
Ld1S_230251200	Concanavalin A-like lectin/glucanases superfamily/Beige/BEACH domain containing protein, putative	23	6963.7	10277.3	1.47583	0.169037	2689	1742	1.54363	0.188543	1.87863e-10	3.24387e-09	0.250154	0.261646	1.04594
Ld1S_230251300	cyclophilin type peptidyl-prolyl cis-trans isomerase, putative	23	551.044	786.363	1.42704	0.154436	521	689	0.756168	-0.121381	0.00119452	0.00409944	1.25035	0.662544	0.529886
Ld1S_230251700	hypothetical protein	23	1445.92	2098.42	1.45127	0.161749	1076	811	1.32676	0.122791	2.29906e-06	1.59568e-05	0.560889	0.512766	0.914202
Ld1S_230252100	endoribonuclease L-PSP (pb5), putative	23	504.284	671.844	1.33227	0.124594	4016	3237	1.24065	0.093651	0.000546102	0.00207779	6.41901	5.97758	0.931231
Ld1S_230252400_pseudogene	argininosuccinate synthase, putative	23	123.779	147.239	1.18953	0.0753756	8	19	0.421053	-0.375664	0.000472974	0.00184508	0.1535	0.0543336	0.353965
Ld1S_230252500	hypothetical protein	23	926.965	1238.99	1.3366	0.126003	957	775	1.23484	0.0916102	0.00166445	0.00544229	0.836062	0.772406	0.923863
Ld1S_230252700	p-glycoprotein e (fragment);pentamidine resistance protein 1;ATP-binding cassette protein subfamily C, member 1, putative (fragment);ATP-binding cassette protein subfamily C, member 5, putative (fragment);ATP-binding cassette protein subfamily C, member 6	23	5840.52	7542.98	1.29149	0.111091	3403	2637	1.29048	0.110752	0.000417431	0.00164964	0.451501	0.451148	0.999219
Ld1S_230252800	argininosuccinate synthase, putative	23	1448.67	2039.53	1.40786	0.14856	270	376	0.718085	-0.143824	0.000316181	0.00130588	0.259549	0.132384	0.510054
Ld1S_230252900	pteridine reductase 1	23	871.035	1284.79	1.47502	0.168797	1870	1542	1.21271	0.0837572	0.00273711	0.00840546	1.77031	1.45549	0.822167
Ld1S_230253000	Zinc finger, C3HC4 type (RING finger), putative	23	2780.89	4168.49	1.49897	0.175794	1581	1178	1.34211	0.127787	2.27546e-07	2.03656e-06	0.423605	0.379274	0.89535
Ld1S_230253100	Checkpoint protein HUS1, putative	23	1030.57	1380.77	1.33981	0.127043	907	638	1.42163	0.152787	9.52366e-08	9.27976e-07	0.619073	0.65688	1.06107
Ld1S_230253200	tryptophanyl-tRNA synthetase, putative	23	1278.13	1802.85	1.41054	0.149386	941	712	1.32163	0.12111	1.09513e-06	8.21954e-06	0.557064	0.52195	0.936966
Ld1S_230253300	hypothetical protein	23	3643.68	5243.87	1.43917	0.158112	1363	876	1.55594	0.191992	6.74186e-13	1.86334e-11	0.240416	0.259922	1.08113
Ld1S_230253400	hypothetical protein	23	904.96	1245.53	1.37634	0.138725	621	447	1.38926	0.142784	0.00140863	0.00471996	0.493945	0.498583	1.00939
Ld1S_230253500	hypothetical protein	23	749.09	958.687	1.2798	0.107142	659	521	1.26488	0.102048	0.000572566	0.00216368	0.69551	0.687399	0.988337
Ld1S_230253600	(H+)-ATPase G subunit, putative	23	330.993	500.611	1.51245	0.179681	1719	1357	1.26676	0.102696	0.000353525	0.0014312	4.09978	3.4338	0.837558
Ld1S_230253900	NADP-dependent alcohol dehydrogenase, putative	23	957.222	1377.5	1.43906	0.158078	6525	4306	1.51533	0.180506	2.9886e-07	2.60068e-06	4.49843	4.73685	1.053
Ld1S_230254000	cytochrome c oxidase subunit 10, putative	23	439.185	624.946	1.42297	0.153195	2574	2094	1.22923	0.0896319	0.000334833	0.00136686	4.76792	4.11876	0.863848
Ld1S_230254100	ATP-binding cassette protein subfamily G, member 5	23	3446.55	4971.21	1.44237	0.159078	2141	1752	1.22203	0.0870826	0.000144592	0.000643125	0.508335	0.43068	0.847237
Ld1S_230254200	hypothetical protein	23	5263.8	7317.21	1.3901	0.143046	2172	1623	1.33826	0.126541	1.30246e-06	9.60347e-06	0.308332	0.296834	0.96271
Ld1S_230254300	hypothetical protein	23	496.032	763.459	1.53913	0.187276	101	68	1.48529	0.171812	0.00248446	0.00772405	0.137088	0.132293	0.965019
Ld1S_230254400	aldose 1-epimerase-like protein	23	1241.45	1718.87	1.38456	0.141313	1215	902	1.34701	0.12937	2.34638e-07	2.09364e-06	0.726567	0.706858	0.972874
Ld1S_230254500	hypothetical protein	23	956.305	1290.25	1.3492	0.130076	1255	984	1.27541	0.105649	0.000119435	0.000542767	1.02896	0.972683	0.945306
Ld1S_230254700	trypanothione synthetase, putative	23	869.202	1258.62	1.44802	0.160773	435	287	1.51568	0.180607	2.31572e-09	3.22039e-08	0.330188	0.345617	1.04673
Ld1S_230254900	hypothetical protein	23	3973.75	5459.82	1.37397	0.137978	2076	1380	1.50435	0.177348	2.19879e-17	1.44218e-15	0.347279	0.380232	1.09489
Ld1S_230255000	Adaptor-related protein complex 3 beta. Intracellular trafficking, secretion, and vesicular transport	23	682.158	1092.84	1.60203	0.20467	909	695	1.30791	0.116579	1.12051e-06	8.3814e-06	1.01883	0.83178	0.816411
Ld1S_230255100	5'-AMP-activated protein kinase subunit beta, putative	23	1033.32	1327.33	1.28452	0.108742	868	455	1.90769	0.280508	9.03016e-25	1.76369e-22	0.440327	0.653945	1.48514
Ld1S_230255200	hypothetical protein	23	905.877	1224.81	1.35207	0.130998	633	488	1.29713	0.112984	0.000218111	0.000940154	0.538705	0.516816	0.959368
Ld1S_230255300	hypothetical protein	23	351.165	498.43	1.41936	0.152093	333	191	1.74346	0.241411	1.17124e-08	1.40054e-07	0.543904	0.668098	1.22834
Ld1S_230255400	SET domain containing protein, putative	23	967.308	1334.96	1.38008	0.139905	582	345	1.68696	0.227104	7.58484e-15	3.2678e-13	0.35666	0.435967	1.22236
Ld1S_230255800	5'-3' exoribonuclease C, putative	23	2973.44	4407.34	1.48224	0.170918	1620	1067	1.51828	0.181351	3.0255e-10	5.01719e-09	0.358844	0.367569	1.02431
Ld1S_230255900	hypothetical protein	23	2369.22	3191.26	1.34697	0.129357	1619	1036	1.56274	0.193887	3.27072e-09	4.39793e-08	0.437275	0.507323	1.16019
Ld1S_230256200	hypothetical protein	23	1034.24	1581.45	1.5291	0.184435	1234	1010	1.22178	0.0869938	0.000540617	0.00205889	0.976563	0.780296	0.799023
Ld1S_230256300	hypothetical protein	23	1746.66	2344.91	1.34251	0.127919	781	492	1.5874	0.200686	4.08114e-11	8.41999e-10	0.281681	0.333062	1.18241
Ld1S_230256400	poly(A)-specific ribonuclease PARN, putative	23	1805.34	2403.81	1.3315	0.124342	540	282	1.91489	0.282145	2.18468e-12	5.54945e-11	0.156204	0.224644	1.43815
Ld1S_230257600	Galactose oxidase, central domain containing protein, putative	23	8755.28	12700.7	1.45063	0.161557	2081	1376	1.51235	0.179654	1.5214e-08	1.77578e-07	0.157162	0.163849	1.04255
Ld1S_230257700	Putative tRNA binding domain containing protein, putative	23	612.475	742.737	1.21268	0.0837463	1441	1081	1.33302	0.124838	0.000345074	0.00140345	1.76497	1.94012	1.09924
Ld1S_230257800	metallo-beta-lactamase family protein-like protein	23	1007.65	1457.12	1.44605	0.160184	801	558	1.43548	0.156998	4.73069e-08	4.99136e-07	0.553764	0.549716	0.992691
Ld1S_230257900	PAP2 superfamily, putative	23	695.911	979.409	1.40738	0.14841	3702	1415	2.61625	0.41768	4.61698e-42	8.11573e-39	2.0333	3.77983	1.85896
Ld1S_230258000	ubiquitin-activating enzyme E1, putative	23	2811.15	3992.89	1.42038	0.152403	2080	1308	1.59021	0.201456	1.58514e-13	5.04774e-12	0.46529	0.520926	1.11957
Ld1S_230258100	kinesin-C	23	1859.43	2568.5	1.38133	0.140299	972	764	1.27225	0.104573	0.00171486	0.00559463	0.410878	0.378432	0.921031
Ld1S_230258200	MYCBP-associated protein family, putative	23	2869.83	4163.03	1.45062	0.161553	1611	1106	1.4566	0.16334	7.73425e-12	1.79831e-10	0.385388	0.386977	1.00412
Ld1S_230258300	hypothetical protein	23	2801.07	3830.38	1.36747	0.135919	801	539	1.48609	0.172044	1.93739e-07	1.75724e-06	0.192427	0.209117	1.08674
Ld1S_230258400	hypothetical protein	23	1139.68	1613.08	1.41538	0.150873	1159	762	1.521	0.182128	1.08081e-07	1.03591e-06	0.668608	0.718501	1.07462
Ld1S_230258500	hypothetical protein	23	976.476	1283.7	1.31463	0.118803	895	696	1.28592	0.109214	6.86281e-05	0.000335096	0.712767	0.697202	0.978163
Ld1S_230258600_pseudogene	hypothetical protein	23	1630.21	2364.54	1.45045	0.161503	637	496	1.28427	0.108658	0.00114306	0.00394749	0.304255	0.269397	0.885431
Ld1S_230258700	WD domain, G-beta repeat/BING4CT (NUC141) domain containing protein, putative	23	2019.89	2787.72	1.38014	0.139922	877	445	1.97079	0.29464	7.94438e-23	1.14464e-20	0.22031	0.314594	1.42797
Ld1S_230258800	leucine rich repeat. Signal transduction mechanisms	23	953.554	1356.78	1.42286	0.153163	126	194	0.649485	-0.187431	7.35847e-05	0.000356744	0.203449	0.0928672	0.456464
Ld1S_230258900	exocyst complex component Sec10, putative	23	3414.46	4474.96	1.31059	0.117467	1056	675	1.56444	0.19436	1.56673e-08	1.82383e-07	0.197689	0.23598	1.19369
Ld1S_230259000	hypothetical protein	23	1757.66	2308.92	1.31363	0.118474	4254	3453	1.23197	0.0906009	0.00251441	0.00780613	1.96455	1.84242	0.937835
Ld1S_230259100	spliceosomal U5 snRNP-specific protein, putative	23	681.241	967.412	1.42007	0.15231	410	250	1.64	0.214844	3.2851e-09	4.40805e-08	0.366977	0.423811	1.15487
Ld1S_230259200	oxidoreductase-like protein. Carbohydrate transport and metabolism;Secondary metabolites biosynthesis, transport and catabolism	23	2206.93	3255.61	1.47518	0.168844	1025	571	1.7951	0.254088	3.57831e-14	1.30497e-12	0.258731	0.314841	1.21687
Ld1S_230259300	oxidoreductase-like protein	23	1014.07	1320.78	1.30246	0.114765	1003	733	1.36835	0.136197	8.61896e-08	8.46391e-07	0.722831	0.759397	1.05059
Ld1S_230259400	mitochondrial DNA primase, putative	23	1533.94	1970.82	1.28481	0.108838	1275	790	1.61392	0.207883	4.47672e-13	1.28162e-11	0.515014	0.64694	1.25616
Ld1S_230259700	acetyl-CoA synthetase, putative (fragment)	23	2081.32	3003.67	1.44316	0.159314	2617	1721	1.52063	0.182023	3.92479e-08	4.21699e-07	0.826881	0.871268	1.05368
Ld1S_230260000	50S ribosome-binding GTPase, putative	23	1389.07	1861.75	1.34028	0.127197	991	530	1.86981	0.271798	4.98795e-23	7.30652e-21	0.38155	0.532295	1.39509
Ld1S_230260100_pseudogene	hypothetical protein	23	2644.28	3689.69	1.39535	0.144682	1080	859	1.25728	0.0994306	0.000750048	0.00274022	0.324852	0.292708	0.901049
Ld1S_230260200	mitochondrial RNA binding protein, putative	23	942.552	1308.79	1.38856	0.142564	1354	1067	1.26898	0.103454	4.73115e-05	0.000240776	1.13203	1.03455	0.913883
Ld1S_230260300	hypothetical protein	23	3906.82	5248.24	1.34335	0.12819	1325	925	1.43243	0.156074	1.73959e-10	3.0097e-09	0.236765	0.252466	1.06631
Ld1S_230260400	Putative serine esterase (DUF676), putative	23	2579.18	3728.95	1.44579	0.160105	366	596	0.614094	-0.211765	7.50357e-10	1.13705e-08	0.231081	0.0981509	0.424747
Ld1S_230260500	SET domain containing protein, putative	23	2468.24	3577.35	1.44935	0.161174	1089	549	1.98361	0.297456	1.07767e-29	3.94653e-27	0.222426	0.304415	1.36861
Ld1S_230260600	hypothetical protein	23	1424.83	1728.69	1.21326	0.0839539	786	511	1.53816	0.187002	1.18126e-10	2.11389e-09	0.358639	0.45468	1.26779
Ld1S_230260700	actin interacting protein-like protein	23	1448.67	2023.17	1.39657	0.145062	991	583	1.69983	0.230405	4.67422e-20	4.19201e-18	0.402438	0.489826	1.21715
Ld1S_230260800	SET domain containing protein, putative	23	1322.14	1688.34	1.27697	0.106181	1008	722	1.39612	0.144923	7.76906e-07	6.06414e-06	0.546084	0.597038	1.09331
Ld1S_230260900	Na/H antiporter-like protein	23	4262.57	5838.28	1.36966	0.136613	3522	2542	1.38552	0.141614	9.9646e-14	3.24366e-12	0.596354	0.60326	1.01158
Ld1S_230261000	hypothetical protein	23	1221.28	1699.24	1.39136	0.143439	2057	1595	1.28966	0.110474	0.000270579	0.00113514	1.306	1.21054	0.926904
Ld1S_230261600	hypothetical protein	23	2207.85	2900.05	1.31352	0.118438	807	509	1.58546	0.200156	1.5155e-12	3.96419e-11	0.230542	0.278271	1.20703
Ld1S_230261700	putative NAD(P)H quinone oxidoreductase, PIG3 family, putative;quinone oxidoreductase-like protein	23	983.812	1445.12	1.4689	0.166992	1521	1208	1.25911	0.100062	1.13804e-05	6.78575e-05	1.22788	1.05251	0.857177
Ld1S_230261800	tRNA	23	185.21	266.12	1.43686	0.157414	52	30	1.73333	0.238882	0.0024819	0.00771882	0.161979	0.195401	1.20634
Ld1S_230262000	beta-fructosidase-like protein (fragment)	23	1440.42	1954.46	1.35687	0.132537	848	626	1.35463	0.131822	1.27091e-05	7.46661e-05	0.434596	0.43388	0.998353
Ld1S_230262100	Putative S-adenosyl-L-methionine-dependent methyltransferase, putative	23	1183.69	1605.45	1.3563	0.132357	1432	1007	1.42205	0.152914	2.8922e-10	4.8143e-09	0.850729	0.891964	1.04847
Ld1S_230262200	hypothetical protein	23	7974.1	10868.4	1.36296	0.134483	4470	2963	1.50861	0.178576	6.13779e-17	3.59633e-15	0.371578	0.411285	1.10686
Ld1S_230262300	Helicase conserved C-terminal domain containing protein, putative	23	1121.34	1632.71	1.45603	0.163171	1131	726	1.55785	0.192526	4.62763e-12	1.11431e-10	0.647438	0.692712	1.06993
Ld1S_230262400	SNF2 family N-terminal domain containing protein, putative	23	702.33	946.689	1.34793	0.129667	530	373	1.42091	0.152567	1.31243e-05	7.65934e-05	0.53109	0.559846	1.05415
Ld1S_230262500	hypothetical protein	23	1464.26	1992.63	1.36085	0.133809	788	542	1.45387	0.162527	5.5512e-09	7.11799e-08	0.370154	0.395458	1.06836
Ld1S_230262700	cytosolic leucyl aminopeptidase	23	1713.65	2342.73	1.3671	0.135801	1536	1051	1.46147	0.164788	1.03449e-10	1.88243e-09	0.613312	0.655646	1.06903
Ld1S_230262900	hypothetical protein	23	1318.47	1678.52	1.27308	0.104855	1147	704	1.62926	0.211991	2.35192e-17	1.51993e-15	0.533951	0.68334	1.27978
Ld1S_230263000	hypothetical protein	23	835.277	1354.59	1.62173	0.209979	979	698	1.40258	0.146927	5.97965e-10	9.26899e-09	0.835651	0.722725	0.864865
Ld1S_230263100	hypothetical protein	23	2161.08	2792.08	1.29198	0.111256	2942	2247	1.3093	0.11704	3.2034e-06	2.1558e-05	1.03976	1.05369	1.01341
Ld1S_230263300	hypothetical protein	23	3121.06	4239.38	1.35832	0.133001	1558	960	1.62292	0.210296	6.9809e-19	5.47813e-17	0.307588	0.367507	1.1948
Ld1S_230263500	hydrophilic acylated surface protein a	23	288.817	385.002	1.33303	0.12484	2713	4099	0.661869	-0.179228	1.50541e-05	8.67612e-05	14.1924	7.04672	0.496515
Ld1S_230263600	hydrophilic acylated surface protein a (fragment)	23	1151.6	1710.15	1.48502	0.171732	886	629	1.40859	0.148783	4.25317e-06	2.7834e-05	0.546196	0.518084	0.94853
Ld1S_230263800	hypothetical protein	23	1743.9	2223.85	1.27521	0.105582	1260	1044	1.2069	0.08167	0.000933266	0.00331146	0.598657	0.566586	0.946428
Ld1S_230263900	hypothetical protein	23	1940.12	2735.37	1.4099	0.149188	827	563	1.46892	0.166997	4.4471e-11	9.06173e-10	0.290189	0.302336	1.04186
Ld1S_230264000	5-formyltetrahydrofolate cyclo-ligase family, putative	23	1404.66	1785.4	1.27106	0.104166	762	544	1.40074	0.146356	1.1239e-07	1.07369e-06	0.387283	0.426794	1.10202
Ld1S_230264100	HIT domain containing protein, putative	23	973.726	1297.88	1.3329	0.124798	629	433	1.45266	0.162163	1.28698e-08	1.52238e-07	0.444684	0.484636	1.08984
Ld1S_230264200	hypothetical protein	23	1361.57	1786.49	1.31209	0.117963	1223	909	1.34543	0.128863	5.56504e-08	5.76937e-07	0.667614	0.684581	1.02541
Ld1S_230264900	hypothetical protein	23	3733.53	4959.21	1.32829	0.123293	1644	982	1.67413	0.22379	7.78275e-17	4.47076e-15	0.263022	0.331504	1.26037
Ld1S_230265000	hypothetical protein	23	1796.17	2473.61	1.37716	0.138984	1637	1317	1.24298	0.0944629	0.000751023	0.00274231	0.733228	0.661786	0.902565
Ld1S_230265300	coronin, putative	23	1519.27	2198.76	1.44725	0.160544	1742	1184	1.47128	0.167696	2.39421e-09	3.30341e-08	0.779322	0.792264	1.01661
Ld1S_230265400	hypothetical protein	23	957.222	1459.3	1.52451	0.183131	1276	801	1.59301	0.202218	3.24631e-11	6.80951e-10	0.836796	0.874393	1.04493
Ld1S_230265600	membrane-bound acid phosphatase 2, putative;membrane-bound acid phosphatase, putative;membrane-bound acid phosphatase 2	23	1555.03	2053.71	1.32069	0.1208	1854	1341	1.38255	0.140681	3.32535e-08	3.63514e-07	0.862364	0.902759	1.04684
Ld1S_230265700	S-adenosyl-methyltransferase mraW-like protein	23	1219.45	1827.94	1.49899	0.175798	586	372	1.57527	0.197355	1.41705e-07	1.32353e-06	0.305056	0.32058	1.05089
Ld1S_230265800	sir2-family protein-like protein	23	906.794	1441.85	1.59005	0.201411	449	302	1.48675	0.172239	8.51305e-07	6.60381e-06	0.333042	0.311406	0.935037
[truncated: 1,725 more rows]

## Sheet: c-All_RNAnormEPstatvsLPstat
Gene id	Product	Chr	norm_gDNA EP.1 stat	norm_gDNA LP.1 stat	norm_RNA LP.1 stat	norm_RNA EP.1 stat	EP_RNAnormAbundance	LP_RNAnormAbundance
[truncated: 8,640 more rows]

## Sheet: d-gene dosage dependent
Gene id	Product	Chr	DNAnorm_EP log	DNAnorm_LP log	DNA FC LP/EP	DNA log10 FC LP/EP	RNA_LP log norm reads	RNA_EP log norm reads	RNA FC LP log/EP log	RNA log10 FC LP log/EP log	pvalue	padj	EP log_RNAnormAbundance	LP log_RNAnormAbundance	ratioLP log_RNAnormAb/EP log_RNAnormAb
[truncated: 1,104 more rows]

[truncated: 6 more sheets: e-gene dosage independent, f-RNAnormCoverChr5_LPlog-EPlog, g-RNAnormCoverChr26_LPlog-EPlog, h-RNAnormCoverChr36_LPlog-EPlog, i-GO_RNAnormAbundance_BP, j- Categories ]
